# Supplementary material for: Transcriptomic Analysis of the Effects of Chemokine Receptor CXCR3 Deficiency on Immune Responses in the Mouse Brain during Toxoplasma gondii Infection
Source: Microorganisms. 2021 Nov 12;9(11):2340. doi: 10.3390/microorganisms9112340 (PMC8620038; doi:10.3390/microorganisms9112340)
Supplement: Supplementary file 1 [file microorganisms-09-02340-s001.zip]

Archive with 6 entries (6 files):
- CXCR3_Supplementary_211031.pdf
- TableS1_DEG by KO only.xlsx
- TableS2_Primers.xlsx
- TableS3_DEG.xlsx
- TableS4_GO.xlsx
- TableS5_KEGG.xlsx
