# Supplementary material for: Transcriptomic Analysis of the Effects of Chemokine Receptor CXCR3 Deficiency on Immune Responses in the Mouse Brain during Toxoplasma gondii Infection
Source: Microorganisms. 2021 Nov 12;9(11):2340. doi: 10.3390/microorganisms9112340 (PMC8620038; doi:10.3390/microorganisms9112340)
Supplement: Supplementary file 1 [file microorganisms-09-02340-s001.zip › TableS1_DEG by KO only.xlsx]

## Sheet: Astrocyte_down
Genes downregulated by CXCR3-deficiency in astrocytes
ENSEMBL ID	Gene symbol	Mean normalized count				Log2 fold change	FDR
		uninfected WT	infected WT	uninfected KO	infected KO
ENSMUSG00000050708	Ftl1	10990.3	13899.9	77.1397	80.0402	-7.13606	0
ENSMUSG00000028927	Padi2	1971.66	872.817	227.279	110.562	-3.11206	1.17334e-182
ENSMUSG00000020932	Gfap	65782	33546.3	12464.8	8210.36	-2.39821	2.63004e-170
ENSMUSG00000020591	Ntsr2	4926.05	3096.69	934.728	566.918	-2.39441	2.30556e-152
ENSMUSG00000031980	Agt	1357.26	1006.29	154.778	120.68	-3.13501	6.40387e-144
ENSMUSG00000021091	Serpina3n	6246.85	10777.8	1336.16	3204.72	-2.22346	1.96479e-138
ENSMUSG00000040093	Bmf	1791.43	1404.5	406.771	251.074	-2.13712	2.0164e-113
ENSMUSG00000024899	Papss2	1294	824.709	288.264	333.187	-2.16108	2.28019e-99
ENSMUSG00000021136	Smoc1	2327.31	1669.68	620.737	540.549	-1.90739	2.14355e-96
ENSMUSG00000044037	Als2cl	3943.2	2026.27	1144.4	422.289	-1.78283	2.87677e-95
ENSMUSG00000018411	Mapt	1384.02	840.314	324.199	187.876	-2.08672	7.43997e-94
ENSMUSG00000029005	Draxin	1220.8	574.427	278.479	133.703	-2.12613	1.63065e-92
ENSMUSG00000015829	Tnr	3242.11	1657.67	920.478	590.198	-1.81412	2.39537e-89
ENSMUSG00000073418	C4b	2298.32	2666.42	593.181	685.525	-1.95485	1.51876e-88
ENSMUSG00000032492	Pth1r	521.453	268.721	103.173	59.2346	-2.33775	2.61545e-86
ENSMUSG00000029095	Ablim2	500.716	232.717	92.7923	38.4721	-2.44483	1.01029e-83
ENSMUSG00000040373	Cacng5	2047.11	999.141	637.218	329.053	-1.68315	1.86283e-76
ENSMUSG00000024347	Psd2	3025.66	1708.62	1001.98	445.775	-1.59226	1.67807e-73
ENSMUSG00000004951	Hspb1	2661.84	2607.05	686.676	792.028	-1.95669	2.19169e-72
ENSMUSG00000005716	Pvalb	287.645	307.128	45.0051	71.5299	-2.66969	2.62806e-72
ENSMUSG00000072945	Ripply1	430.797	174.301	77.013	58.529	-2.46834	2.79138e-68
ENSMUSG00000026701	Prdx6	12834.2	10244.9	4868.87	4635.58	-1.39676	9.33981e-65
ENSMUSG00000005686	Ampd3	3626.21	2489.53	1315.13	914.569	-1.46163	1.60353e-63
ENSMUSG00000064246	Chil1	274.154	3444.79	51.5381	721.718	-2.39745	1.75157e-63
ENSMUSG00000021250	Fos	1666.5	2170.58	563.292	714.912	-1.56374	1.22081e-61
ENSMUSG00000043323	Fbrsl1	2419.15	1657.86	794.346	695.478	-1.60555	6.52573e-59
ENSMUSG00000002985	Apoe	27379.6	23163.9	10630.1	8867.57	-1.36338	1.12725e-58
ENSMUSG00000028214	Gem	1217.02	1324.08	313.077	513.519	-1.95818	2.81483e-58
ENSMUSG00000054477	Kcnn2	355.642	237.548	77.7876	50.1951	-2.18143	3.46662e-58
ENSMUSG00000041423	Paqr6	275.339	104.491	44.5139	18.4642	-2.5991	3.6994e-58
ENSMUSG00000039533	Mmd2	7983.26	4933.42	3149.49	1575.24	-1.33997	5.14941e-58
ENSMUSG00000022790	Igsf11	4360.24	2583.95	1683.77	1020.25	-1.37072	1.44414e-57
ENSMUSG00000004558	Ndrg2	9289.62	8455.06	3570.87	3564.6	-1.37715	1.10585e-55
ENSMUSG00000036040	Adamtsl2	453.486	137.312	113.283	37.6704	-2.01886	1.92075e-55
ENSMUSG00000026576	Atp1b1	7680.16	5292.23	2895.94	2343.65	-1.40557	3.13666e-55
ENSMUSG00000086503	Xist	17979.3	19406.4	5317.94	5531.12	-1.7557	1.71917e-54
ENSMUSG00000022479	Vdr	365.311	505.342	83.5968	114.07	-2.11664	5.65808e-54
ENSMUSG00000034648	Lrrn1	2377.93	1362.89	912.238	485.349	-1.3813	2.11362e-53
ENSMUSG00000027381	Bcl2l11	1931.06	1433.62	737.95	640.766	-1.38642	3.00855e-53
ENSMUSG00000055022	Cntn1	2738.44	1699.96	878.078	582.638	-1.63992	9.08415e-53
ENSMUSG00000020034	Tcp11l2	660.427	487.228	204.848	136.632	-1.6833	9.70074e-53
ENSMUSG00000030428	Ttyh1	9929.53	5838.81	4113.24	2432.89	-1.26972	1.10043e-52
ENSMUSG00000071847	Apcdd1	1445.69	788.212	538.513	280.586	-1.42437	1.66839e-52
ENSMUSG00000070337	Gpr179	518.063	214.011	141.81	60.9752	-1.86554	7.03657e-52
ENSMUSG00000026442	Nfasc	3434.36	2697.24	1268.1	847.973	-1.43507	9.51261e-52
ENSMUSG00000022122	Ednrb	28586.3	18792.3	11090.7	8014.45	-1.36434	3.20273e-50
ENSMUSG00000097767	Miat	3137.81	1296.59	1181.78	436.008	-1.40705	3.40924e-50
ENSMUSG00000049555	Tmie	419.074	261.839	113.985	58.8535	-1.85784	4.67477e-50
ENSMUSG00000020674	Pxdn	10352.6	7788.55	4478.9	4873.34	-1.20696	3.06334e-48
ENSMUSG00000033174	Mgll	1526.63	1636.26	523.607	812.804	-1.53631	4.78842e-47
ENSMUSG00000061718	Ppp1r1b	259.076	68.5311	57.4141	21.6534	-2.18551	8.3058e-47
ENSMUSG00000067586	S1pr3	6253.77	12209.2	2634.4	5679.45	-1.24536	9.33611e-47
ENSMUSG00000015085	Entpd2	288.671	247.169	67.7347	79.8948	-2.06841	1.00016e-46
ENSMUSG00000029778	Adcyap1r1	9109.07	3992.04	3958.05	1492.96	-1.20067	1.46084e-46
ENSMUSG00000037348	Paqr7	1280.71	548.851	491.952	212.369	-1.37465	7.24661e-46
ENSMUSG00000031613	Hpgd	676.817	378.03	220.368	80.0392	-1.61668	3.40159e-44
ENSMUSG00000017390	Aldoc	10792.8	6003.35	4786.27	2890.86	-1.17157	5.6999e-44
ENSMUSG00000045994	B3gat1	511.355	309.711	151.797	109.3	-1.74388	1.01151e-43
ENSMUSG00000026077	Npas2	208.577	146.847	46.0471	56.2926	-2.15321	1.06577e-43
ENSMUSG00000038668	Lpar1	1347.25	1187.58	541.729	528.05	-1.30925	1.40187e-43
ENSMUSG00000019577	Pdk4	710.991	407.282	215.702	143.734	-1.71554	2.28471e-43
ENSMUSG00000038077	Kcna6	2863.48	1362.96	1110.57	527.865	-1.36419	8.58374e-43
ENSMUSG00000045532	C1ql1	940.402	614.415	258.954	275.78	-1.86081	8.58374e-43
ENSMUSG00000022265	Ank	3999.02	2770.54	1720.36	1345.97	-1.21422	9.10971e-43
ENSMUSG00000024978	Gpam	5034.01	3475.39	2147.18	1498.33	-1.22749	1.97777e-42
ENSMUSG00000036995	Asap3	1394.5	2056.3	567.639	921.338	-1.29365	4.13694e-42
ENSMUSG00000055254	Ntrk2	25120.7	18937.1	11496.1	8072.36	-1.12609	1.03032e-41
ENSMUSG00000075590	Nrbp2	3551.74	2088.27	1419.87	774.384	-1.3203	3.90798e-41
ENSMUSG00000017639	Rab11fip4	2886.22	1923.76	1100.6	946.622	-1.38946	1.08781e-40
ENSMUSG00000016028	Celsr1	2534.34	2072.69	1133.88	1038.44	-1.15872	3.9301e-40
ENSMUSG00000036502	Tmem255a	509.952	324.027	172.871	93.6181	-1.56634	4.36285e-40
ENSMUSG00000072672	Duxbl3	69.7197	49.6491	3.21352	1.24343	-4.12176	2.81408e-38
ENSMUSG00000022358	Fbxo32	601.425	510.426	220.873	200.541	-1.44278	2.9435e-38
ENSMUSG00000070498	Tmem132b	4023.63	3203.06	1770.11	1245.45	-1.18289	3.11131e-38
ENSMUSG00000030307	Slc6a11	742.684	459.461	267.022	121.151	-1.48026	4.07102e-38
ENSMUSG00000036560	Lgi4	225.942	114.785	55.2171	32.1303	-2.04897	7.25723e-38
ENSMUSG00000032181	Scg3	2632.62	2210.5	1167.68	1025.44	-1.17049	1.97668e-37
ENSMUSG00000024411	Aqp4	33208.6	35074.9	13528.1	15926.7	-1.29399	5.70499e-37
ENSMUSG00000041708	Mpped1	81.9121	19.0603	9.18177	2.77772	-3.11265	6.11014e-37
ENSMUSG00000028803	Nipal3	894.642	675.072	366.848	256.118	-1.28384	2.12596e-36
ENSMUSG00000033083	Tbc1d4	1341.91	931.737	594.556	425.719	-1.17065	3.05969e-36
ENSMUSG00000022132	Cldn10	233.931	96.1076	69.8832	27.821	-1.7301	1.8625e-35
ENSMUSG00000000732	Icosl	184.614	964.631	47.6122	525.117	-1.96459	1.91026e-35
ENSMUSG00000023169	Slc38a1	15180.6	10730	7266.13	6362.83	-1.06125	2.04016e-35
ENSMUSG00000052430	Bmpr1b	577.494	286.971	217.913	127.113	-1.40396	2.13613e-35
ENSMUSG00000028600	Podn	309.202	283.363	94.7843	110.923	-1.69697	6.18584e-35
ENSMUSG00000061080	Lsamp	1074.66	694.831	459.916	286.518	-1.22011	1.27186e-34
ENSMUSG00000019772	Vip	94.4031	39.1131	14.9887	5.05449	-2.55401	4.01195e-34
ENSMUSG00000003279	Dlgap1	640.586	404.267	270.954	234.873	-1.23629	4.01195e-34
ENSMUSG00000028517	Plpp3	12230	10834.9	6056.81	5604.28	-1.01213	1.13684e-33
ENSMUSG00000005338	Cadm3	402.047	341.292	143.586	158.472	-1.47877	4.50621e-33
ENSMUSG00000022270	Retreg1	781.554	566.528	287.886	226.771	-1.43162	5.74671e-33
ENSMUSG00000059970	Hspa2	1580.09	1243.98	706.562	564.06	-1.16046	1.09129e-32
ENSMUSG00000020014	Cfap54	944.621	629.862	360.799	247.898	-1.37933	2.13285e-32
ENSMUSG00000035279	Ssc5d	1431.09	1479.29	667.317	615.744	-1.09996	2.33647e-32
ENSMUSG00000007097	Atp1a2	29734.2	25029.8	15243.6	11083.3	-0.962235	3.88758e-32
ENSMUSG00000079484	Phyhd1	560.317	490.544	227.863	272.689	-1.28708	6.35011e-32
ENSMUSG00000031070	Mrgprf	133.511	73.6311	29.1013	10.7583	-2.18609	7.61521e-32
ENSMUSG00000031765	Mt1	10543	13741	4603.49	6497.34	-1.19365	2.00141e-31
ENSMUSG00000075510	Fam187a	97.8405	25.8591	17.3122	2.63229	-2.49126	2.15121e-31
ENSMUSG00000022469	Rapgef3	3310.88	3274.96	1621.59	1562.15	-1.02784	2.92725e-31
ENSMUSG00000071324	Armc2	806.402	530.718	366.34	255.311	-1.13527	3.33092e-31
ENSMUSG00000028944	Prkag2	2256.09	1528.58	1107.26	758.517	-1.0245	3.66631e-31
ENSMUSG00000048677	Tpcn2	632.217	391.116	257.771	224.727	-1.28724	8.39987e-31
ENSMUSG00000040111	Gramd1b	867.307	635.443	370.36	318.627	-1.22893	1.39006e-30
ENSMUSG00000035237	Lcat	796.331	754.662	326.794	292.335	-1.2867	7.09899e-30
ENSMUSG00000050315	Synpo2	681.373	453.805	266.814	212.84	-1.3453	9.33319e-30
ENSMUSG00000034891	Sncb	290.543	223.665	106.808	114.996	-1.45616	9.41647e-30
ENSMUSG00000042254	Cilp	77.308	64.6687	12.363	19.2067	-2.64867	1.58153e-29
ENSMUSG00000022096	Hr	1157.94	896.369	535.233	508.429	-1.11048	2.50432e-29
ENSMUSG00000024292	Cyp4f14	118.803	46.7045	25.9846	10.2296	-2.15135	2.95065e-29
ENSMUSG00000047793	Sned1	1521.82	615.905	692.226	340.922	-1.13691	3.13385e-29
ENSMUSG00000033717	Adra2a	469.53	285.078	181.184	164.466	-1.37165	3.90747e-29
ENSMUSG00000020642	Rnf144a	2040.83	1574.91	960.866	698.819	-1.08606	4.90393e-29
ENSMUSG00000071550	Cfap44	1313.49	918.231	628.221	366.062	-1.05953	7.40057e-29
ENSMUSG00000021453	Gadd45g	3018.51	2158.73	1348.28	1037.21	-1.16187	9.48163e-29
ENSMUSG00000024219	Anks1	2138.98	1212.23	997.402	792.132	-1.09953	1.271e-27
ENSMUSG00000045875	Adra1a	223.624	183.165	79.0554	55.8343	-1.51264	1.27837e-27
ENSMUSG00000033857	Engase	255.075	137.763	87.9282	79.4201	-1.52813	1.39637e-27
ENSMUSG00000021215	Net1	3413.25	3664.61	1677.51	1715.73	-1.02234	1.45647e-27
ENSMUSG00000017446	C1qtnf1	988.687	835.984	465.938	452.518	-1.08176	2.44576e-27
ENSMUSG00000038393	Txnip	3757.91	2235.76	1905.36	1132.22	-0.977128	2.65588e-27
ENSMUSG00000035200	Chrnb4	65.8612	21.8016	8.21811	2.38801	-2.92381	2.66193e-27
ENSMUSG00000034059	Ypel4	368.853	323.203	140.444	122.428	-1.38225	3.1516e-27
ENSMUSG00000038453	Srcin1	463.147	215.546	134.404	53.9967	-1.78789	3.82528e-27
ENSMUSG00000062209	Erbb4	635.697	430.264	256.025	168.987	-1.30843	5.0637e-27
ENSMUSG00000036611	Eepd1	621.5	366.938	280.803	190.734	-1.13755	7.51578e-27
ENSMUSG00000037705	Tecta	127.558	72.8477	33.1607	28.8821	-1.93026	1.28203e-26
ENSMUSG00000038860	Garnl3	459.696	258.998	191.039	139.71	-1.2725	1.32714e-26
ENSMUSG00000049556	Lingo1	835.176	431.485	335.241	184.208	-1.31577	1.38717e-26
ENSMUSG00000064373	Selenop	1026.24	571.799	415.295	256.575	-1.30496	1.71076e-26
ENSMUSG00000027875	Hmgcs2	47.6308	51.8296	4.29701	10.4122	-3.326	1.94538e-26
ENSMUSG00000029769	Ccdc136	1997.18	1495.85	1014.08	823.544	-0.975253	1.97667e-26
ENSMUSG00000025978	Rftn2	1558.29	1169.72	786.074	616.689	-0.984864	2.86743e-26
ENSMUSG00000015533	Itga2	1356.88	1582.54	640.812	893.832	-1.07858	4.88609e-26
ENSMUSG00000022272	Myo10	20322.7	14884.9	11003.1	8217.73	-0.883556	5.56478e-26
ENSMUSG00000020333	Acsl6	1295.78	852.323	617.108	395.54	-1.06551	6.81641e-26
ENSMUSG00000033768	Nrxn2	2463.84	1645.31	1007.89	706.873	-1.28842	9.76634e-26
ENSMUSG00000015354	Pcolce2	417.844	268.466	169.034	147.047	-1.29546	2.03434e-25
ENSMUSG00000057092	Fxyd3	36.5578	12.2978	0.772285	2.26439	-4.87089	2.12966e-25
ENSMUSG00000049939	Lrrc4	661.012	340.305	301.902	134.019	-1.13085	3.20348e-25
ENSMUSG00000002475	Abhd3	338.988	156.326	105.738	62.9517	-1.67812	3.20778e-25
ENSMUSG00000025537	Phkg1	297.369	148.075	96.4695	45.3916	-1.62777	6.17902e-25
ENSMUSG00000091722	Siah3	69.2412	29.9212	9.9217	11.532	-2.72134	8.44713e-25
ENSMUSG00000023055	Calcoco1	2374.79	2099.32	1258.52	1173	-0.914773	9.19548e-25
ENSMUSG00000027544	Nfatc2	413.46	673.438	172.078	231.966	-1.26615	1.06059e-24
ENSMUSG00000038530	Rgs4	330.95	264.553	129.593	168.099	-1.35467	1.2132e-24
ENSMUSG00000042834	Nrep	4746.93	3136.66	2545.07	2164.29	-0.897056	1.64377e-24
ENSMUSG00000032826	Ank2	14166.8	12845.7	7638.82	7684.05	-0.889395	1.74401e-24
ENSMUSG00000040759	Cmtm5	117.585	64.5201	27.5178	18.758	-2.06454	1.86002e-24
ENSMUSG00000033276	Stk36	942.418	665.726	445.044	337.682	-1.0759	1.90751e-24
ENSMUSG00000078670	Fam174b	331.66	211.167	142.47	123.873	-1.21573	1.95421e-24
ENSMUSG00000083282	Ctsf	642.21	585.326	309.198	329.402	-1.0515	2.09392e-24
ENSMUSG00000018822	Sfrp5	82.7571	19.4762	7.67182	4.08011	-3.31847	2.09392e-24
ENSMUSG00000026821	Ralgds	3715.35	3027.86	1835.12	1780.04	-1.01569	2.43921e-24
ENSMUSG00000021933	Gucy1b2	28.4106	13.6633	0.504832	0.414477	-5.65316	4.08249e-24
ENSMUSG00000019359	Gdpd2	1860.52	1433.9	981.219	770.281	-0.920299	4.4777e-24
ENSMUSG00000025348	Itga7	3363.69	2919.48	1826.04	1570.03	-0.878934	6.11861e-24
ENSMUSG00000021846	Peli2	1989.02	1457.63	976.379	752.354	-1.02512	7.23245e-24
ENSMUSG00000041329	Atp1b2	60876.8	45734.8	26876.7	17052.4	-1.178	1.02992e-23
ENSMUSG00000020926	Adam11	887.866	560.957	422.962	194.312	-1.06612	1.24925e-23
ENSMUSG00000029406	Pitpnm2	3841.34	2556.34	1880.37	1478.18	-1.02904	1.40603e-23
ENSMUSG00000041696	Rasl12	292.995	220.788	108.266	103.558	-1.41908	1.52017e-23
ENSMUSG00000039552	Rsph4a	442.691	263.578	202.496	92.0511	-1.13146	3.47443e-23
ENSMUSG00000027333	Smox	1613.02	1528.89	800.863	903.875	-1.0091	3.63287e-23
ENSMUSG00000046598	Bdh1	2081.17	1181.74	1036.45	693.937	-1.00528	3.79949e-23
ENSMUSG00000033059	Pygb	8258.9	5253.37	4645.87	3146.56	-0.82828	5.02307e-23
ENSMUSG00000018581	Dnah11	246.924	173.259	92.7255	42.1213	-1.39707	5.16137e-23
ENSMUSG00000031385	Plxnb3	108.128	45.9786	30.9292	20.2427	-1.81555	5.4006e-23
ENSMUSG00000027309	4930402H24Rik	3950.38	2639.27	2116.95	1633.79	-0.897086	5.67151e-23
ENSMUSG00000034135	Sik3	3799.93	4559.67	2060.63	2857.63	-0.880968	7.97306e-23
ENSMUSG00000002831	Plin4	79.755	58.6886	17.9348	15.0399	-2.12026	1.11707e-22
ENSMUSG00000081534	Slc48a1	3885.87	3555.31	1950.56	1780.77	-0.992605	1.1409e-22
ENSMUSG00000040260	Daam2	7164.22	4867.16	3990.25	2847.11	-0.842666	1.1471e-22
ENSMUSG00000041607	Mbp	183.719	341.382	46.8121	84.5648	-1.96469	1.53747e-22
ENSMUSG00000025545	Clybl	708.334	718.375	356.157	426.781	-0.9946	1.58719e-22
ENSMUSG00000072676	Tmem254a	95.0337	108.364	16.1045	6.58878	-2.44033	2.02239e-22
ENSMUSG00000041771	Slc24a4	81.3511	94.8905	17.4805	20.3911	-2.21919	2.14887e-22
ENSMUSG00000036181	Hist1h1c	492.261	261.731	228.857	137.477	-1.10244	2.18421e-22
ENSMUSG00000036949	Slc39a12	461.403	225.462	218.379	87.6095	-1.07647	2.95239e-22
ENSMUSG00000001095	Slc13a2	40.6333	35.594	3.31946	6.23623	-3.6888	4.49597e-22
ENSMUSG00000043557	Mdga1	1253.28	1124.96	650.744	594.663	-0.942135	5.08377e-22
ENSMUSG00000022037	Clu	8562.55	8296.3	4694.22	4963.54	-0.86549	6.53241e-22
ENSMUSG00000037747	Phyhipl	1937.31	1725.34	1045.06	1087.24	-0.887141	6.82526e-22
ENSMUSG00000042675	Ypel3	620.217	598.008	314.788	314.041	-0.97702	7.47757e-22
ENSMUSG00000026389	Steap3	435.31	410.775	168.022	131.68	-1.37388	9.19656e-22
ENSMUSG00000049252	Lrp1b	234.301	143.591	92.2902	62.2216	-1.32508	9.32979e-22
ENSMUSG00000033595	Lgi3	194.101	124.674	73.189	54.2663	-1.37599	1.51282e-21
ENSMUSG00000020334	Slc22a4	296.365	205.55	82.3632	77.2184	-1.84202	2.85502e-21
ENSMUSG00000005089	Slc1a2	8913.94	9807.04	4897.16	4466.62	-0.862364	2.88091e-21
ENSMUSG00000051590	Map3k19	466.587	221.249	223.383	82.1059	-1.06476	3.08023e-21
ENSMUSG00000022489	Pde1b	2420.01	2690.48	1330.46	1782.78	-0.860199	3.22269e-21
ENSMUSG00000036913	Trim67	254.355	186.003	105.635	53.858	-1.27729	3.23687e-21
ENSMUSG00000039960	Rhou	854.562	1046.86	434.192	512.285	-0.971434	3.32871e-21
ENSMUSG00000030701	Plekhb1	3037.44	2534.2	1704.11	1629	-0.832789	3.44329e-21
ENSMUSG00000049112	Oxtr	149.288	37.7243	43.797	20.7038	-1.73841	3.82243e-21
ENSMUSG00000027570	Col9a3	642.409	665.139	317.971	280.867	-1.01662	6.17874e-21
ENSMUSG00000071604	Fam189a2	348.302	403.84	155.308	133.691	-1.15242	7.71974e-21
ENSMUSG00000013921	Clip3	8825.47	8302.08	4213.43	4310.04	-1.06495	8.65463e-21
ENSMUSG00000031700	Gpt2	4624.45	2433.98	2548.68	1395.39	-0.85786	1.14252e-20
ENSMUSG00000072812	Ahnak2	2739.09	1861.31	1441.52	1149.03	-0.9251	1.14252e-20
ENSMUSG00000029096	Htra3	693.704	486.079	258.793	176.562	-1.42213	1.55701e-20
ENSMUSG00000017631	Abr	1727.06	942.685	958.939	806.811	-0.846886	1.61145e-20
ENSMUSG00000031762	Mt2	5865.05	8489.71	3026.29	4660.19	-0.953072	2.07233e-20
ENSMUSG00000006342	Susd2	125.529	90.1202	42.0242	30.8252	-1.60383	2.14628e-20
ENSMUSG00000064115	Cadm2	704.582	627.484	270.543	278.44	-1.37691	3.11121e-20
ENSMUSG00000045655	Fam216b	83.6258	27.7611	13.617	7.74574	-2.49216	3.27948e-20
ENSMUSG00000027457	Snph	523.812	292.871	230.888	116.927	-1.17837	3.29841e-20
ENSMUSG00000059336	Slc14a1	1145.4	502.769	602.032	415.316	-0.922892	3.55609e-20
ENSMUSG00000037852	Cpe	19615.3	17779.8	11601.8	10640.2	-0.755931	4.55663e-20
ENSMUSG00000024055	Cyp4f13	432.625	354.47	208.524	188.889	-1.05309	4.86674e-20
ENSMUSG00000052942	Glis3	3343.02	3225.97	1876.05	2172.44	-0.83046	5.04185e-20
ENSMUSG00000030276	Ttll3	268.489	173.039	119.662	80.829	-1.15377	5.60439e-20
ENSMUSG00000022425	Enpp2	404.732	1480.98	181.228	1201.11	-1.14977	8.11983e-20
ENSMUSG00000022010	Tsc22d1	7547.09	6966.18	4376.41	3782.84	-0.784477	8.22561e-20
ENSMUSG00000031111	Igsf1	178.65	106.198	64.9684	35.5452	-1.45426	8.44279e-20
ENSMUSG00000020672	Sntg2	125.29	93.4787	40.2887	36.5535	-1.60294	9.89596e-20
ENSMUSG00000039157	Fam102a	1436.52	1019.05	669.996	517.332	-1.09702	1.15106e-19
ENSMUSG00000070509	Rgma	4367.01	4388.59	2107.81	1969.64	-1.04946	1.20375e-19
ENSMUSG00000027253	Lrp4	5320.5	3541.09	2984.15	2195.51	-0.832285	1.3696e-19
ENSMUSG00000020593	Lpin1	3366.38	3212.38	1761.17	1507.23	-0.932891	1.56003e-19
ENSMUSG00000058297	Spock2	680.445	584.463	340.474	277.933	-0.996188	1.60414e-19
ENSMUSG00000046240	Hepacam	5916.23	4255.73	3257.93	2302.88	-0.858903	1.89351e-19
ENSMUSG00000032609	Klhdc8b	323.851	194.474	149.794	113.86	-1.10564	2.02571e-19
ENSMUSG00000051159	Cited1	273.168	285.194	123.867	149.21	-1.12722	2.07005e-19
ENSMUSG00000021340	Gpld1	253.663	188.508	103.915	82.7391	-1.26709	2.15019e-19
ENSMUSG00000021314	Amph	692.523	485.11	363.128	255.873	-0.9319	2.24826e-19
ENSMUSG00000046157	Tmem229b	922.6	652.174	470.526	357.573	-0.965781	2.41978e-19
ENSMUSG00000025025	Mxi1	1963.6	2053.45	1114.8	1286.87	-0.814632	3.02604e-19
ENSMUSG00000027254	Map1a	7217.15	4302.03	3899.5	2257.87	-0.886744	3.6425e-19
ENSMUSG00000040055	Gjb6	28.0635	13.7014	1.43157	3.94707	-3.84842	3.6425e-19
ENSMUSG00000059895	Ptp4a3	1657.55	2020.04	786.007	830.964	-1.07434	4.29727e-19
ENSMUSG00000026227	2810459M11Rik	2391.41	1100.25	1330.22	611.56	-0.845359	5.03629e-19
ENSMUSG00000063704	Mapk15	221.539	149.161	81.9145	51.4886	-1.41769	5.16682e-19
ENSMUSG00000033720	Sfxn5	8568.74	5537.95	5041.35	3450.69	-0.763465	6.21963e-19
ENSMUSG00000022454	Nell2	4119.43	3069.24	2366.11	1570.69	-0.798296	6.26214e-19
ENSMUSG00000022658	Tagln3	634.844	349.647	319.921	262.79	-0.993758	6.8477e-19
ENSMUSG00000049571	Cfap46	347.367	234.201	140.997	103.75	-1.29477	7.2512e-19
ENSMUSG00000027452	Acss1	1325.49	753.167	677.329	406.648	-0.965113	7.59684e-19
ENSMUSG00000001313	Rnd2	824.721	419.232	417.265	261.077	-0.983588	1.10225e-18
ENSMUSG00000085886	D030047H15Rik	252.783	119.561	104.519	44.2747	-1.25829	1.34009e-18
ENSMUSG00000047361	Gm973	543.823	249.136	272.129	105.396	-1.00779	1.38557e-18
ENSMUSG00000033420	Antxr1	3485.9	2642.67	2040.41	1537.35	-0.77133	1.38557e-18
ENSMUSG00000064036	Mro	571.551	317.653	288.695	170.146	-0.984789	1.63836e-18
ENSMUSG00000061576	Dpp6	164.591	112.339	63.2233	44.3612	-1.37586	1.72165e-18
ENSMUSG00000039782	Cpeb2	1260.49	1262.92	702.999	675.472	-0.838512	1.82524e-18
ENSMUSG00000025350	Rdh5	388.456	236.271	189.381	131.584	-1.0342	2.28749e-18
ENSMUSG00000076431	Sox4	8371.85	6888.2	4691.53	5310.72	-0.833869	2.35278e-18
ENSMUSG00000024500	Ppp2r2b	485.927	330.941	244.189	164.977	-0.987482	2.39202e-18
ENSMUSG00000032816	Igdcc4	7137.69	6554.16	4226.93	3723.41	-0.753926	3.33252e-18
ENSMUSG00000027577	Chrna4	561.688	235.831	248.073	122.701	-1.18287	3.43812e-18
ENSMUSG00000038354	Ankrd35	100.327	32.7999	30.3827	20.6171	-1.7499	3.69397e-18
ENSMUSG00000024330	Col11a2	152.455	83.7865	53.4907	36.5904	-1.50971	3.69397e-18
ENSMUSG00000005413	Hmox1	1711.66	4443.83	979.955	2277.65	-0.804093	3.93448e-18
ENSMUSG00000021559	Dapk1	1527.42	1466.16	860.542	789.953	-0.825003	4.39116e-18
ENSMUSG00000003534	Ddr1	14103.3	13872	7565.76	7941.98	-0.896763	4.90106e-18
ENSMUSG00000031351	Zfp185	129.972	86.4052	44.6871	28.8078	-1.48955	6.20014e-18
ENSMUSG00000021360	Gcnt2	633.551	1146.05	313.673	588.691	-1.00153	6.76664e-18
ENSMUSG00000107667	C530044C16Rik	159.647	162.901	47.8109	65.1666	-1.67797	7.13493e-18
ENSMUSG00000030519	Apba2	1512.23	948.798	837.35	432.467	-0.853957	7.37817e-18
ENSMUSG00000022562	Oplah	396.141	296.485	187.865	159.671	-1.06403	8.84784e-18
ENSMUSG00000031714	Gab1	2973.5	2731.99	1739.75	1406.15	-0.772139	1.03926e-17
ENSMUSG00000022759	Lrrc74b	120.055	70.0591	36.8471	20.4033	-1.63975	1.13789e-17
ENSMUSG00000020930	Ccdc103	190.79	103.598	80.699	66.2188	-1.24033	1.3196e-17
ENSMUSG00000049612	Omg	127.676	53.1811	40.155	26.6432	-1.65473	1.78166e-17
ENSMUSG00000022629	Kif21a	3603.84	3217.9	1942.74	1893.8	-0.889841	1.81945e-17
ENSMUSG00000024892	Pcx	1766.73	1386.28	1022.3	812.959	-0.786433	2.16399e-17
ENSMUSG00000045761	Togaram2	201.394	305.288	82.8362	82.8333	-1.28566	2.41825e-17
ENSMUSG00000022462	Slc38a2	5700.66	7075.95	3274.24	4556.7	-0.798162	2.59669e-17
ENSMUSG00000031425	Plp1	324.08	269.104	156.94	136.696	-1.03437	3.11407e-17
ENSMUSG00000029723	Tsc22d4	4495.53	3856.47	1930.35	1676.23	-1.21797	3.60789e-17
ENSMUSG00000057103	Nat8f1	270.281	124.671	127.564	64.6969	-1.07934	3.74585e-17
ENSMUSG00000030111	A2m	26495.3	31328.9	15810.6	17927.5	-0.743187	3.76002e-17
ENSMUSG00000063297	Luzp2	2610.85	1653.73	1395.42	849.829	-0.901695	3.86074e-17
ENSMUSG00000020828	Pld2	1401.05	1244.77	783.01	679.663	-0.839355	4.05318e-17
ENSMUSG00000066392	Nrxn3	473.148	406.248	239.184	137.21	-0.978554	5.35439e-17
ENSMUSG00000037738	Nek5	115.074	105.074	39.4934	45.1931	-1.48253	6.04778e-17
ENSMUSG00000030747	Dgat2	216.036	209.426	94.1983	90.6432	-1.20253	6.29741e-17
ENSMUSG00000022094	Slc39a14	2254.09	2689.81	1304.47	1462.84	-0.786212	6.87842e-17
ENSMUSG00000003849	Nqo1	253.11	148.088	115.133	89.7156	-1.11776	7.22177e-17
ENSMUSG00000036854	Hspb6	2678.97	2742.94	1424.54	1590.49	-0.909869	8.48739e-17
ENSMUSG00000040189	Ccdc114	429.276	319.214	218.596	159.64	-0.96216	8.59734e-17
ENSMUSG00000049608	Gpr55	61.8123	18.5916	14.9541	9.15937	-1.96461	9.19452e-17
ENSMUSG00000029922	Mkrn1	1000.05	906.961	560.065	568.153	-0.832775	9.66868e-17
ENSMUSG00000020647	Ncoa1	2527.09	1849.11	1501.13	1121.38	-0.748718	9.72001e-17
ENSMUSG00000034908	Sidt2	4674.39	4394.6	2566.85	2726.46	-0.862883	1.02869e-16
ENSMUSG00000043262	Uevld	885.835	909.306	491.169	411.496	-0.844078	1.11971e-16
ENSMUSG00000051048	P4ha3	1466.87	1037.69	833.532	598.935	-0.814283	1.33701e-16
ENSMUSG00000006611	Hfe	393.729	380.163	204.91	185.413	-0.936622	1.38535e-16
ENSMUSG00000029765	Plxna4	592.797	441.39	315.477	257.776	-0.911489	1.59678e-16
ENSMUSG00000089809	Rasgef1b	254.427	381.088	116.167	258.61	-1.13081	1.63797e-16
ENSMUSG00000038831	Ralgps1	931.303	760.807	502.551	412.195	-0.88761	1.80623e-16
ENSMUSG00000024245	Tmem178	305.105	148.681	114.809	60.7681	-1.40759	1.92346e-16
ENSMUSG00000026489	Coq8a	132.664	88.9607	42.3652	23.2001	-1.67589	2.12971e-16
ENSMUSG00000019478	Rab4a	258.832	185.158	120.199	130.341	-1.11104	2.30707e-16
ENSMUSG00000000594	Gm2a	3736.7	3764.59	2282.92	2336.02	-0.709104	2.36027e-16
ENSMUSG00000036002	Fam214b	1446.86	1223.83	815.158	758.038	-0.824793	2.42371e-16
ENSMUSG00000010021	Kif19a	79.9656	34.4986	23.79	14.4829	-1.71392	2.53492e-16
ENSMUSG00000049313	Sorl1	13074.5	10728.7	8055.26	6110.83	-0.697048	2.8781e-16
ENSMUSG00000087408	Cers1	863.907	648.13	393.219	269.359	-1.12982	3.37828e-16
ENSMUSG00000053141	Ptprt	692.303	862.421	371.857	432.325	-0.895885	3.38907e-16
ENSMUSG00000046167	Gldn	291.269	262.601	134.941	120.197	-1.11188	3.43633e-16
ENSMUSG00000009487	Otog	64.7916	23.5941	14.3848	3.53259	-2.1143	3.62007e-16
ENSMUSG00000034949	Zfr2	314.256	281.916	147.53	147.113	-1.08662	3.95067e-16
ENSMUSG00000026424	Gpr37l1	1303.13	1024.93	663.008	553.536	-0.974115	4.08853e-16
ENSMUSG00000013846	St3gal1	495.409	812.436	271.558	554.033	-0.863346	4.6232e-16
ENSMUSG00000024942	Capn1	677.95	452.503	330.781	282.276	-1.03237	4.84438e-16
ENSMUSG00000050953	Gja1	13143.2	8710.04	7728.88	7505.8	-0.764307	5.47408e-16
ENSMUSG00000021794	Glud1	10078.2	7788.99	6241.48	5019.49	-0.689601	7.52605e-16
ENSMUSG00000032009	Sesn3	4859.15	4369.29	2779.23	2566.46	-0.804191	8.25345e-16
ENSMUSG00000050666	Vstm4	281.241	119.977	129.529	73.4326	-1.10078	9.29582e-16
ENSMUSG00000001156	Mxd1	656.028	1794.04	362.205	801.689	-0.851266	9.48024e-16
ENSMUSG00000029442	Wdr66	152.837	121.518	64.1339	53.1742	-1.24102	1.07497e-15
ENSMUSG00000016494	Cd34	205.303	171.634	91.8867	179.298	-1.13483	1.10473e-15
ENSMUSG00000060924	Csmd1	399.442	691.393	191.973	399.776	-1.04884	1.10473e-15
ENSMUSG00000091971	Hspa1a	239.602	241.685	98.9316	126.363	-1.25798	1.22403e-15
ENSMUSG00000039518	Cdsn	186.931	179.077	67.8917	95.2101	-1.45129	1.35801e-15
ENSMUSG00000050271	Prag1	2706.78	1590.19	1369.79	888.932	-0.980988	1.49428e-15
ENSMUSG00000038156	Spon1	4592.81	3638.64	2766.72	2092.57	-0.728958	1.58463e-15
ENSMUSG00000035606	Ky	65.5032	18.9916	18.5802	14.2139	-1.7709	1.62106e-15
ENSMUSG00000043154	Ppp2r3a	4831.47	4197.91	2894.45	2570.72	-0.737157	1.63766e-15
ENSMUSG00000042707	Dnali1	278.92	178.906	128.526	87.9616	-1.11839	1.65873e-15
ENSMUSG00000022708	Zbtb20	33322.9	28295.1	19869.5	16200.6	-0.744485	1.82952e-15
ENSMUSG00000047557	Lxn	4722.09	4011.59	2824.28	2820.78	-0.740674	1.87553e-15
ENSMUSG00000032280	Tle3	5589.3	4500.53	3359.99	3188.34	-0.732621	1.88817e-15
ENSMUSG00000040997	Abhd4	3690.62	3778.92	2153.04	2272.51	-0.77585	2.18768e-15
ENSMUSG00000032514	Ttc21a	221.071	153.674	102.82	65.0457	-1.092	2.22975e-15
ENSMUSG00000028270	Gbp2	285.601	10274.1	123.11	5431.5	-1.21614	2.3408e-15
ENSMUSG00000017417	Plxdc1	190.191	98.2092	80.9112	34.5525	-1.25153	2.39303e-15
ENSMUSG00000066687	Zbtb16	164.515	121.172	69.5439	39.2819	-1.24038	2.41078e-15
ENSMUSG00000054520	Sh3bp2	310.339	260.723	148.27	148.724	-1.06802	2.52164e-15
ENSMUSG00000099041	Gm28035	1332.28	1473.79	695.636	718.967	-0.939852	3.26513e-15
ENSMUSG00000026587	Astn1	4015.5	3048.71	2496.35	1803.88	-0.683859	3.31668e-15
ENSMUSG00000016239	Lonrf3	883.212	732.844	518.045	571.739	-0.768958	3.45994e-15
ENSMUSG00000021943	Gdf10	249.255	149.695	117.014	51.467	-1.07952	3.75703e-15
ENSMUSG00000022946	Dopey2	963.833	949.307	565.848	566.906	-0.768944	4.0977e-15
ENSMUSG00000068299	Nat8f4	307.961	127.394	155.306	65.2037	-0.974711	4.30481e-15
ENSMUSG00000057963	Itpk1	1105.36	849.685	644.098	546.437	-0.77522	4.30481e-15
ENSMUSG00000005045	Chd5	303.448	207.331	146.02	114.883	-1.06726	4.93729e-15
ENSMUSG00000040003	Magi2	985.658	667.277	563.098	412.153	-0.806845	5.33138e-15
ENSMUSG00000027784	Ppm1l	1936.73	1535.44	1085.95	938.205	-0.833229	5.34191e-15
ENSMUSG00000025207	Sema4g	932.283	941.417	492.158	469.58	-0.920654	5.55676e-15
ENSMUSG00000056698	Elmod3	593.677	531.852	296.363	282.507	-0.99824	5.70537e-15
ENSMUSG00000021190	Lgmn	3821.06	3315.34	2352.19	2101.68	-0.698057	5.78722e-15
ENSMUSG00000059974	Ntm	668.144	549.554	304.444	311.596	-1.1292	6.03854e-15
ENSMUSG00000032303	Chrna3	43.5167	7.7595	4.76721	2.13135	-3.12848	6.83258e-15
ENSMUSG00000020611	Gna13	5359.21	5715.15	3356.97	3649.35	-0.67286	6.91651e-15
ENSMUSG00000056679	Gpr173	592.22	426.624	333.219	257.774	-0.825903	7.59415e-15
ENSMUSG00000020388	Pdlim4	1393.16	1976.72	807.657	1722.91	-0.783589	7.86596e-15
ENSMUSG00000022108	Itm2b	8953.45	10180.5	5664.26	6543.17	-0.658841	8.67594e-15
ENSMUSG00000074643	Cpne1	1785.68	1450.83	952.545	1021.24	-0.90204	8.75244e-15
ENSMUSG00000031983	2310022B05Rik	2201.75	1992.75	1235.37	1186.82	-0.832465	9.6186e-15
ENSMUSG00000037196	Pacrg	246.353	186.038	120.158	107.737	-1.02189	1.02486e-14
ENSMUSG00000025425	St8sia5	130.007	93.9167	49.447	26.6242	-1.40513	1.1158e-14
ENSMUSG00000006464	Bbs1	742.903	522.559	419.58	301.953	-0.817044	1.24018e-14
ENSMUSG00000049281	Scn3b	278.394	279.266	119.326	147.57	-1.20513	1.27146e-14
ENSMUSG00000030827	Fgf21	38.1259	30.3018	7.19	12.7041	-2.33843	1.50435e-14
ENSMUSG00000035984	Nme5	375.071	300.482	198.49	157.608	-0.909452	1.50435e-14
ENSMUSG00000027832	Ptx3	513.03	5843.62	276.394	2586.99	-0.889688	1.60943e-14
ENSMUSG00000107978	Gm44109	64.2533	54.7445	17.1302	25.455	-1.9039	1.65084e-14
ENSMUSG00000032087	Dscaml1	47.3945	36.0006	10.2445	16.7072	-2.13222	2.74572e-14
ENSMUSG00000006127	Inpp5k	481.072	431.984	262.651	261.439	-0.862474	3.09519e-14
ENSMUSG00000052572	Dlg2_2	59.4723	37.3949	15.6917	31.6138	-1.83527	3.11187e-14
ENSMUSG00000040721	Zfhx2	915.603	851.163	528.325	584.961	-0.786512	3.82836e-14
ENSMUSG00000031812	Map1lc3b	2130.18	1845.76	1329.28	1297.58	-0.679128	3.8398e-14
ENSMUSG00000022262	Dnah5	297.619	200.154	152.555	134.034	-0.96042	3.89376e-14
ENSMUSG00000026380	Tfcp2l1	229.835	324.184	109.252	127.546	-1.06442	4.53691e-14
ENSMUSG00000052688	Rab7b	301.881	386.143	156.347	154.462	-0.950917	4.54979e-14
ENSMUSG00000030088	Aldh1l1	9288.45	8314.74	5988.06	5086.94	-0.631679	4.79849e-14
ENSMUSG00000089736	Tgfbr3l	122.99	136.686	49.4172	50.7387	-1.32519	4.85436e-14
ENSMUSG00000042453	Reln	246.953	194.391	120.128	108.51	-1.02646	4.86286e-14
ENSMUSG00000076435	Acsf2	1613.88	1353.17	948.099	815.634	-0.767529	5.06483e-14
ENSMUSG00000073102	Drc1	625.33	485.224	351.302	254.059	-0.832417	5.08312e-14
ENSMUSG00000048240	Gng7	367.286	314.103	194.112	147.443	-0.905815	5.22037e-14
ENSMUSG00000029219	Slc10a4	39.7756	17.6038	7.54037	3.19219	-2.35509	5.30675e-14
ENSMUSG00000022805	Maats1	232.718	139.454	95.5515	74.5682	-1.27544	5.30675e-14
ENSMUSG00000032489	Kif9	288.004	195.519	145.755	89.7117	-0.980953	5.55044e-14
ENSMUSG00000020599	Rgs9	381.317	388.386	179.983	172.793	-1.06917	6.47941e-14
ENSMUSG00000040978	Gm11992	183.071	167.472	85.6531	95.246	-1.10028	6.89815e-14
ENSMUSG00000097649	Gm10561	197.827	130.325	89.42	75.9655	-1.13702	7.10789e-14
ENSMUSG00000029206	Nsun7	377.864	305.679	180.04	132.838	-1.06542	7.22023e-14
ENSMUSG00000038967	Pdk2	1332.61	1140.18	723.51	597.77	-0.878045	7.9113e-14
ENSMUSG00000021939	Ctsb	11738.5	11549.4	7410.22	7705.12	-0.661932	8.33541e-14
ENSMUSG00000061411	Nol4l	1052.32	668.809	629.75	486.753	-0.736343	8.56727e-14
ENSMUSG00000014773	Dll1	493.85	310.949	271.412	202.274	-0.871059	8.69575e-14
ENSMUSG00000047216	Cdh19	299.991	243.75	129.094	89.4637	-1.22285	9.16826e-14
ENSMUSG00000066129	Kndc1	112.56	55.8926	43.5505	25.127	-1.3626	9.71535e-14
ENSMUSG00000028294	Cfap206	146.45	102.19	64.6501	33.8035	-1.17011	1.02293e-13
ENSMUSG00000026255	Efhd1	363.351	246.846	197.922	135.507	-0.881317	1.02679e-13
ENSMUSG00000066842	Hmcn1	220.255	256.268	107.984	119.158	-1.02246	1.03169e-13
ENSMUSG00000047021	Cfap65	66.5764	35.9003	19.0504	9.91698	-1.78043	1.03359e-13
ENSMUSG00000017754	Pltp	955.809	989.697	555.195	563.887	-0.776814	1.06565e-13
ENSMUSG00000028159	Dapp1	359.655	514.38	192.793	301.978	-0.898399	1.08949e-13
ENSMUSG00000029675	Eln	2492.7	2270.69	1431.58	1537.77	-0.797058	1.2274e-13
ENSMUSG00000026664	Phyh	1025.38	1006.09	623.249	590.564	-0.716149	1.30877e-13
ENSMUSG00000015090	Ptgds	88.6519	72.2554	31.1113	44.3704	-1.55294	1.31647e-13
ENSMUSG00000031786	Drc7	173.562	117.187	75.4892	76.4769	-1.19867	1.32696e-13
ENSMUSG00000042246	Tmc7	881.123	811.809	485.195	492.927	-0.856858	1.35396e-13
ENSMUSG00000040258	Nxph4	118.61	144.489	44.634	42.4407	-1.40802	1.35812e-13
ENSMUSG00000039763	Dnajc28	244.952	152.327	117.652	99.914	-1.04745	1.42504e-13
ENSMUSG00000016024	Lbp	321.508	495.421	161.417	271.206	-0.98745	1.45736e-13
ENSMUSG00000010505	Myt1	62.6664	25.0469	14.7005	12.1472	-1.99422	1.5394e-13
ENSMUSG00000032717	Mdfi	805.281	504.576	333.913	256.37	-1.27008	1.816e-13
ENSMUSG00000073155	1810058I24Rik	1340.15	1018.44	816.822	695.949	-0.710933	1.90881e-13
ENSMUSG00000066113	Adamtsl1	966.591	874.232	522.412	413.779	-0.884646	2.00196e-13
ENSMUSG00000024140	Epas1	1046.97	947.524	539.37	728.863	-0.959444	2.18418e-13
ENSMUSG00000040164	Kcns1	154.931	79.9564	66.9647	34.2027	-1.19115	2.30659e-13
ENSMUSG00000049001	Ndnf	1220.27	975.681	644.944	505.351	-0.918887	2.40286e-13
ENSMUSG00000060224	Pyroxd2	284.786	238.257	144.098	126.807	-0.977689	2.55714e-13
ENSMUSG00000024059	Clip4	1589	2125.71	959.917	1044.63	-0.72577	2.63467e-13
ENSMUSG00000044461	Shisa2	61.3884	25.4562	18.2713	6.78944	-1.78141	2.64857e-13
ENSMUSG00000030708	Dnajb13	165.313	114.544	78.3685	57.8541	-1.07735	2.75049e-13
ENSMUSG00000042599	Kdm7a	1964.21	1911.92	1078	1008.64	-0.862965	2.81668e-13
ENSMUSG00000021884	Hacl1	470.785	393.911	221.576	194.9	-1.07897	2.95017e-13
ENSMUSG00000024665	Fads2	7403.84	7212.75	4584.89	4988.53	-0.689761	3.02781e-13
ENSMUSG00000020538	Srebf1	5697.5	4593.64	3504.16	2652.86	-0.69959	3.43423e-13
ENSMUSG00000053646	Plxnb1	7938.21	7059.47	4763.13	4270.79	-0.735094	3.47558e-13
ENSMUSG00000030083	Abtb1	335.088	283.109	181.35	173.382	-0.890485	3.56345e-13
ENSMUSG00000070532	Ccdc190	296.96	154.823	139.032	57.7028	-1.11582	3.6454e-13
ENSMUSG00000086006	Gm13293	185.79	365.465	83.3063	127.407	-1.13873	4.38934e-13
ENSMUSG00000036192	Rorb	2024.4	1298.69	1257.96	828.652	-0.684151	4.8334e-13
ENSMUSG00000039452	Snx22	82.5571	54.4501	27.7526	14.4705	-1.55867	4.89451e-13
ENSMUSG00000010663	Fads1	9549.43	8985.6	6236.81	5756.45	-0.612863	5.35335e-13
ENSMUSG00000028756	Pink1	1728.56	1555.24	935.505	759.583	-0.884192	5.35727e-13
ENSMUSG00000021127	Zfp36l1	5258.27	8364.39	3081.68	4889.57	-0.769114	5.57726e-13
ENSMUSG00000034312	Iqsec1	4650.25	3953.98	2456.36	2117.19	-0.919157	5.76876e-13
ENSMUSG00000032017	Grik4	271.774	194.352	128.517	105.334	-1.08059	5.94581e-13
ENSMUSG00000040249	Lrp1	33035.5	36570.5	20883.6	21313.1	-0.659933	6.05302e-13
ENSMUSG00000037287	Tbcel	1752.45	1253.92	1071.7	830.431	-0.705254	6.25457e-13
ENSMUSG00000040859	Bsdc1	1103.16	1118.66	654.931	790.98	-0.747674	6.77309e-13
ENSMUSG00000087042	Gm11611	62.0681	35.4844	19.871	6.41858	-1.70076	7.23563e-13
ENSMUSG00000048387	Osr1	301.703	263.283	160.281	139.256	-0.897667	7.44043e-13
ENSMUSG00000028542	Slc6a9	1745.1	1034.68	1010.51	624.869	-0.785288	7.52062e-13
ENSMUSG00000043541	Casc1	205.936	118.753	99.8925	43.9772	-1.04469	7.95448e-13
ENSMUSG00000062480	Acat3	293.29	151.288	67.8177	27.574	-2.12253	9.27237e-13
ENSMUSG00000035357	Pdzrn3	1984.36	2223.35	1266.92	1283.53	-0.645619	9.70592e-13
ENSMUSG00000003526	Prodh	115.986	75.4747	49.5302	44.491	-1.2127	1.04176e-12
ENSMUSG00000029361	Nos1	52.1091	36.3171	14.0941	17.7341	-1.87924	1.07358e-12
ENSMUSG00000097587	4930578M01Rik	44.8034	36.8852	11.3808	20.7286	-1.98395	1.27588e-12
ENSMUSG00000035539	Ccdc180	47.7733	29.6679	12.9231	11.0586	-1.83599	1.38096e-12
ENSMUSG00000033006	Sox10	103.008	117.245	39.4772	42.0691	-1.35138	1.41406e-12
ENSMUSG00000033308	Dpyd	177.649	176.269	86.8495	82.0345	-1.01928	1.51955e-12
ENSMUSG00000015243	Abca1	18967.1	23301.3	11904	14889.3	-0.67041	1.59908e-12
ENSMUSG00000036885	Arhgef26	3122.11	2218.69	2023.71	1587.16	-0.623668	1.60137e-12
ENSMUSG00000035936	Aldh5a1	1766.92	1310.42	1088.62	791.282	-0.696698	1.71771e-12
ENSMUSG00000039457	Ppl	210.834	188.723	101.363	141.152	-1.07524	1.74889e-12
ENSMUSG00000026469	Xpr1	6067.97	4878.86	3868.57	3134.05	-0.647484	1.80845e-12
ENSMUSG00000079235	Ccdc13	162.204	81.0444	67.5989	39.4618	-1.22321	1.81985e-12
ENSMUSG00000028064	Sema4a	112.299	139.731	38.7257	61.6533	-1.54529	1.95719e-12
ENSMUSG00000049807	Arhgap23	1834.72	1490.35	1062.04	871.218	-0.78747	1.96959e-12
ENSMUSG00000059554	Ccdc28a	189.05	173.781	87.3683	92.803	-1.10141	1.99025e-12
ENSMUSG00000107283	Mpv17	846.552	679.244	511.568	493.409	-0.721106	2.38581e-12
ENSMUSG00000024112	Cacna1h	2237.84	2557.9	1339.36	1296.18	-0.73873	2.38783e-12
ENSMUSG00000053279	Aldh1a1	1225.95	882.502	754.28	523.005	-0.69861	2.79227e-12
ENSMUSG00000064368	mt-Nd6	23207.3	16443.4	13584.5	13713.9	-0.771058	2.98098e-12
ENSMUSG00000027574	Nkain4	142.968	59.0553	66.3238	28.5358	-1.08459	3.09234e-12
ENSMUSG00000092274	Neat1	3011.4	2184.24	1650.29	1232.8	-0.865033	3.13069e-12
ENSMUSG00000086155	9430041J12Rik	130.909	67.2436	54.9086	20.5611	-1.21697	3.27077e-12
ENSMUSG00000051359	Ncald	1085.89	651.299	656.93	441.259	-0.722469	3.27077e-12
ENSMUSG00000060376	Bckdha	822.624	815.643	480.435	514.961	-0.77625	3.49721e-12
ENSMUSG00000038178	Slc43a2	735.253	2204.18	442.09	1128.24	-0.733633	3.91606e-12
ENSMUSG00000030030	1700003E16Rik	288.193	243.617	156.161	126.143	-0.879795	3.91675e-12
ENSMUSG00000033849	B3galt2	122.595	74.6532	52.7854	41.4569	-1.18251	4.01982e-12
ENSMUSG00000029335	Bmp3	75.9	91.8328	27.7872	14.693	-1.42284	4.24381e-12
ENSMUSG00000038481	Cdk19	1325.82	1214.08	791.658	752.731	-0.742188	4.31946e-12
ENSMUSG00000039963	Ccdc40	344.666	250.585	188.968	143.808	-0.867267	4.52423e-12
ENSMUSG00000025422	Agap2	457.735	296.722	249.965	124.063	-0.879516	5.2722e-12
ENSMUSG00000110357	A030001D20Rik	106.636	93.9799	43.4653	26.2498	-1.25672	5.39442e-12
ENSMUSG00000034664	Itga2b	209.041	200.02	89.5537	87.1879	-1.20475	5.55435e-12
ENSMUSG00000021903	Galnt15	94.8312	50.8827	37.3538	28.2793	-1.39449	5.65233e-12
ENSMUSG00000023033	Scn8a	443.962	286.911	259.755	156.987	-0.770018	5.77229e-12
ENSMUSG00000022025	Cnmd	141.003	70.4434	64.5004	25.4922	-1.10656	5.7816e-12
ENSMUSG00000028088	Fmo5	187.259	134.587	85.7979	69.3951	-1.1319	5.82283e-12
ENSMUSG00000022762	Ncam2	1107.09	827.764	671.597	398.668	-0.721435	5.85777e-12
ENSMUSG00000036766	Dner	995.368	615.746	622.448	451.951	-0.676453	6.36477e-12
ENSMUSG00000038576	Susd4	690.864	891.472	385.202	389.389	-0.837975	6.67838e-12
ENSMUSG00000027375	Mal	203.923	100.438	87.1976	48.9118	-1.20697	7.19302e-12
ENSMUSG00000020799	Tekt1	135.679	97.2874	62.9743	39.5141	-1.09195	7.47531e-12
ENSMUSG00000072663	Spef2	340.122	212.128	183.41	108.508	-0.89386	7.53903e-12
ENSMUSG00000027244	Atg13	586.42	542.859	351.96	350.396	-0.732397	7.67071e-12
ENSMUSG00000034472	Rasd2	60.7667	66.3785	19.7812	13.8953	-1.61791	8.0212e-12
ENSMUSG00000026628	Atf3	170.86	372.553	56.2732	158.826	-1.56282	8.65759e-12
ENSMUSG00000075273	Ttc30b	723.433	460.238	434.999	324.522	-0.729592	8.91493e-12
ENSMUSG00000095407	Tmem200c	172.689	153.61	79.8972	83.3528	-1.10728	9.04785e-12
ENSMUSG00000067786	Nnat	1970.28	1486.56	1147.56	1150.98	-0.7778	9.47945e-12
ENSMUSG00000071398	2410004P03Rik	312.851	206.754	167.456	115.57	-0.908045	1.0034e-11
ENSMUSG00000026173	Plcd4	2530.68	1807.21	1646.98	1109.52	-0.617052	1.04177e-11
ENSMUSG00000028957	Per3	1307	1305.03	801.928	618.588	-0.699778	1.10167e-11
ENSMUSG00000074622	Mafb	181.576	150.94	79.2424	75.3786	-1.16665	1.20831e-11
ENSMUSG00000103332	Pcdhga2	314.398	269.689	176.433	151.193	-0.832473	1.22734e-11
ENSMUSG00000041757	Plekha6	297.078	282.851	163.881	187.239	-0.857327	1.2766e-11
ENSMUSG00000036095	Dgkb	336.657	257.308	190.666	136.13	-0.811029	1.2766e-11
ENSMUSG00000009394	Syn2	558.336	534.043	325.6	324.252	-0.777641	1.51786e-11
ENSMUSG00000085069	Gm13111	327	229.449	174.103	120.061	-0.899649	1.71526e-11
ENSMUSG00000071424	Grid2	376.222	278.55	209.425	150.601	-0.839078	1.83824e-11
ENSMUSG00000028078	Dclk2	6398.31	6141.24	4191.92	3836.53	-0.608086	1.89617e-11
ENSMUSG00000029098	Acox3	912.42	798.353	572.776	496.522	-0.668354	2.00064e-11
ENSMUSG00000032269	Htr3a	73.7574	35.3804	28.2691	17.4001	-1.3834	2.19666e-11
ENSMUSG00000026223	Itm2c	7175.36	5648.48	4139.23	3873.34	-0.791997	2.22015e-11
ENSMUSG00000046329	Slc25a23	6120.26	5242.44	3841.89	3070.99	-0.670059	2.34285e-11
ENSMUSG00000013236	Ptprs	22234.1	21750.3	14470.2	13890.2	-0.61795	2.37369e-11
ENSMUSG00000022180	Slc7a8	197.433	112.046	101.384	87.9623	-0.948208	2.41337e-11
ENSMUSG00000026185	Igfbp5	30121.3	20595.7	19870	15244.8	-0.59855	2.43861e-11
ENSMUSG00000040447	Spns2	84.4444	66.0499	32.6515	26.1975	-1.31339	2.96418e-11
ENSMUSG00000037016	Frem2	1948.51	2334.32	1241.47	1033.62	-0.648257	3.06799e-11
ENSMUSG00000029309	Sparcl1	17308.5	16823.5	10696.9	10017.2	-0.692714	3.33287e-11
ENSMUSG00000003420	Fcgrt	342.81	301.282	183.545	176.978	-0.882925	3.45134e-11
ENSMUSG00000030494	Rhpn2	77.1327	55.9771	29.9727	17.6875	-1.3571	3.56794e-11
ENSMUSG00000021779	Thrb	212.345	120.006	86.932	53.143	-1.29631	3.73542e-11
ENSMUSG00000019775	Rgs17	565.862	462.404	348.915	408.595	-0.697983	3.85214e-11
ENSMUSG00000026649	Cfap126	183.633	167.034	94.6157	96.8918	-0.960048	4.01396e-11
ENSMUSG00000019055	Plod1	2908	2715.73	1800.81	1585.72	-0.689014	4.13545e-11
ENSMUSG00000072294	Klf12	253.51	251.202	140.704	146.556	-0.847785	4.16223e-11
ENSMUSG00000021709	Erbin	13609.5	13693.3	8138.32	7812.56	-0.740209	4.42233e-11
ENSMUSG00000029413	Naaa	588.465	513.472	346.492	408.756	-0.759605	4.96254e-11
ENSMUSG00000033029	1700088E04Rik	362.285	277.853	173.998	156.699	-1.07214	4.98325e-11
ENSMUSG00000072680	Tmem254c	901.644	920.448	117.212	132.851	-2.93502	5.01775e-11
ENSMUSG00000039904	Gpr37	84.1031	36.9122	34.4469	9.39127	-1.30622	5.39676e-11
ENSMUSG00000040327	Cul9	1261.02	1131.44	777.468	704.141	-0.692183	5.41903e-11
ENSMUSG00000006782	Cnp	2512.74	1750.38	1588.63	1181.86	-0.660134	5.64064e-11
ENSMUSG00000036641	Ccdc148	197.848	120.158	96.7803	71.8666	-1.02066	6.01689e-11
ENSMUSG00000055652	Klhl25	1338	1464.85	861.748	818.19	-0.634107	6.10987e-11
ENSMUSG00000032679	Cd59a	126.546	72.2405	49.7283	49.02	-1.32215	6.16958e-11
ENSMUSG00000059439	Bcas3	594.949	519.479	355.572	339.316	-0.744192	6.20161e-11
ENSMUSG00000059883	Irak4	499.279	402.775	285.094	263.347	-0.810966	6.21609e-11
ENSMUSG00000041992	Rapgef5	66.6625	207.666	22.9991	81.8123	-1.56369	6.61417e-11
ENSMUSG00000038916	Soga3	333.42	220.968	187.397	169.188	-0.820148	7.06317e-11
ENSMUSG00000020604	Arsg	252.207	213.343	127.752	113.643	-0.956977	7.26104e-11
ENSMUSG00000024172	St6gal2	76.2933	35.3312	30.588	13.4342	-1.33576	7.58561e-11
ENSMUSG00000037686	Aspg	100.465	50.6117	41.2685	17.1217	-1.23489	7.67485e-11
ENSMUSG00000032340	Neo1	8012.63	6831.71	5422.18	4561.58	-0.561675	7.75438e-11
ENSMUSG00000040855	Reps2	163.414	102.502	75.471	55.095	-1.09024	7.86724e-11
ENSMUSG00000040280	Ndufa4l2	233.863	272.538	99.3488	119.406	-1.23632	9.23807e-11
ENSMUSG00000015305	Sash1	2969.97	2642.2	1985.18	1559.84	-0.579902	9.70604e-11
ENSMUSG00000002332	Dhrs1	12666.7	18126.8	8485.77	14928.9	-0.57624	9.97565e-11
ENSMUSG00000022574	Naprt	442.117	324.844	235.551	188.166	-0.908617	1.02214e-10
ENSMUSG00000019558	Slc6a8	2339.8	2432.49	1437.15	1488.2	-0.700864	1.10048e-10
ENSMUSG00000037996	Slc24a2	60.5633	45.5201	20.8301	16.9544	-1.50592	1.10852e-10
ENSMUSG00000059854	Hydin	79.7922	45.3659	33.0269	27.3666	-1.28199	1.13767e-10
ENSMUSG00000020883	Fbxl20	1940.99	2123.57	1266.98	1169.03	-0.613312	1.17656e-10
ENSMUSG00000057193	Slc44a2	2513.42	2671.1	1579.21	1657.12	-0.667799	1.19214e-10
ENSMUSG00000040929	Rfx3	2659.46	2073.08	1533.6	1168.68	-0.792627	1.21278e-10
ENSMUSG00000006920	Ezh1	438.505	448.929	260.099	238.167	-0.743287	1.22838e-10
ENSMUSG00000019929	Dcn	419.894	603.065	249.061	468.697	-0.750379	1.32945e-10
ENSMUSG00000064220	Hist2h2aa1	29.3528	3.17102	4.43049	15.4518	-2.89922	1.33725e-10
ENSMUSG00000072675	Duxbl2	224.18	138.147	15.4728	8.32373	-3.79828	1.34751e-10
ENSMUSG00000056752	Dnah9	411.87	235.595	222.712	111.344	-0.892778	1.35021e-10
ENSMUSG00000056749	Nfil3	520.702	923.317	319.832	531.486	-0.705144	1.54581e-10
ENSMUSG00000041548	Hspb8	2411.64	2554.24	1471.81	1652.25	-0.711175	1.56491e-10
ENSMUSG00000054793	Cadm4	8792.04	7736.4	5147.51	4432.61	-0.77067	1.58231e-10
ENSMUSG00000041540	Sox5	876.336	565.221	563.645	313.959	-0.6338	1.63976e-10
ENSMUSG00000063428	Ddo	293.132	223.178	161.735	115.105	-0.851151	1.66421e-10
ENSMUSG00000035376	Hacd2	1329.19	1360.22	841.912	917.715	-0.65874	1.71245e-10
ENSMUSG00000034467	Dynlrb2	50.0054	30.0475	14.652	18.2199	-1.82512	1.71348e-10
ENSMUSG00000101299	Gm28175	86.0769	60.9796	31.7157	26.723	-1.36238	1.90063e-10
ENSMUSG00000032523	Hhatl	24.2791	8.14471	3.68828	0.414477	-2.74462	1.91289e-10
ENSMUSG00000057176	Ccdc189	302.689	189.969	162.77	106.986	-0.883754	1.95816e-10
ENSMUSG00000042613	Pbxip1	8190.65	7284.15	5552.82	4457.58	-0.559039	2.02185e-10
ENSMUSG00000026471	Mr1	540.021	463.561	311.527	265.708	-0.783953	2.0391e-10
ENSMUSG00000005949	Ctns	388.461	288.576	212.914	182.092	-0.855037	2.11832e-10
ENSMUSG00000070564	Ntn5	53.3529	59.1778	16.1665	20.6513	-1.77063	2.15092e-10
ENSMUSG00000015224	Cyp2j9	325.814	187.633	153.355	84.7659	-1.08232	2.16063e-10
ENSMUSG00000047789	Slc38a9	504.552	355.773	300.575	253.492	-0.738346	2.21376e-10
ENSMUSG00000030352	Tspan9	2981.91	2110.75	1957.17	1531.21	-0.605307	2.30885e-10
ENSMUSG00000006522	Itih3	468.512	347.115	263.503	218.701	-0.830619	2.36314e-10
ENSMUSG00000028354	Fmn2	1686.6	1151.64	1095.35	710.611	-0.62025	2.51725e-10
ENSMUSG00000044788	Fads6	154.145	94.6771	75.1782	46.0476	-1.00913	2.60586e-10
ENSMUSG00000020644	Id2	1822.86	1502.5	1206.14	1017.48	-0.593397	3.09636e-10
ENSMUSG00000033722	BC034090	794.159	635.234	490.392	489.055	-0.694398	3.30877e-10
ENSMUSG00000023153	Tmem52	13.7001	3.66579	0.504832	0	-4.61251	3.4411e-10
ENSMUSG00000026385	Dbi	13057.1	11374.4	8841.13	8357.32	-0.560819	3.46546e-10
ENSMUSG00000038013	Wipf2	1257.11	1182.59	778.38	738.083	-0.689335	3.79981e-10
ENSMUSG00000022453	Naga	1170.12	1170.59	698.732	594.556	-0.742804	3.97421e-10
ENSMUSG00000036523	Greb1	576.356	415.203	358.155	280.1	-0.679998	4.42503e-10
ENSMUSG00000040746	Rnf167	570.819	498.423	345.877	344.97	-0.71609	4.73899e-10
ENSMUSG00000022388	Ttll8	194.447	152.511	104.605	67.1527	-0.886616	4.73899e-10
ENSMUSG00000037169	Mycn	283.143	145.048	144.162	123.74	-0.9583	5.0241e-10
ENSMUSG00000004565	Pnpla6	1158.49	1035.73	721.453	678.271	-0.677505	5.13906e-10
ENSMUSG00000103567	Pcdhga5	380.463	338.738	232.529	184.917	-0.706424	5.13906e-10
ENSMUSG00000041361	Myzap	113.486	58.1511	49.7723	16.7347	-1.16424	5.52219e-10
ENSMUSG00000037820	Tgm2	1099.92	2378.76	691.729	1445.84	-0.666699	5.64317e-10
ENSMUSG00000054364	Rhob	3227.45	3282	2036.16	2749.65	-0.663625	5.67734e-10
ENSMUSG00000079415	Cntf	145.013	106.509	73.1266	78.6052	-0.979731	6.30881e-10
ENSMUSG00000026224	4933407L21Rik	62.0642	19.4892	23.654	8.78182	-1.35219	6.40886e-10
ENSMUSG00000021756	Il6st	9161.23	9440.99	6282.8	5970.02	-0.542458	6.78553e-10
ENSMUSG00000057716	Tmem178b	89.8838	64.4922	39.2672	30.021	-1.19693	7.64726e-10
ENSMUSG00000031837	Necab2	142.369	158.993	70.2286	52.3483	-1.04232	7.66675e-10
ENSMUSG00000112121	AC163903.1	46.248	18.5693	14.6406	4.45743	-1.62191	7.8095e-10
ENSMUSG00000057880	Abat	3335.74	3235.32	2245.23	2101.87	-0.569478	7.91991e-10
ENSMUSG00000024998	Plce1	5553.29	4172.64	3713.18	2705.95	-0.578641	7.91991e-10
ENSMUSG00000038319	Kcnh2	156.778	83.2333	76.9534	98.1333	-1.0053	8.23123e-10
ENSMUSG00000020175	Rab36	616.12	396.647	383.067	265.461	-0.678678	8.32542e-10
ENSMUSG00000038224	Serpinf2	43.7537	14.5879	8.47648	0.974381	-2.34554	8.39836e-10
ENSMUSG00000030123	Plxnd1	2323.31	4871.81	1496.15	3345.59	-0.633308	8.52321e-10
ENSMUSG00000023031	Cela1	53.0458	44.4525	14.7882	13.1434	-1.70933	8.81269e-10
ENSMUSG00000015850	Adamtsl4	1253.88	1446.53	606.736	549.195	-1.04602	9.10411e-10
ENSMUSG00000039382	Wdr45	293.395	270.068	170.292	170.526	-0.785316	9.41213e-10
ENSMUSG00000073600	Prob1	206.429	125.272	115.796	72.257	-0.829311	9.66594e-10
ENSMUSG00000041544	Disp3	369.294	295.69	218.047	184.666	-0.74797	9.71312e-10
ENSMUSG00000101556	Gm28869	42.4182	35.8288	13.156	4.55925	-1.62171	1.04151e-09
ENSMUSG00000021238	Aldh6a1	1449.82	1255.45	927.86	729.784	-0.640561	1.04382e-09
ENSMUSG00000056598	Drc3	195.44	161.001	100.918	78.6047	-0.95336	1.1209e-09
ENSMUSG00000060962	Dmkn	14.012	7.7233	0.968203	2.27678	-3.48375	1.13099e-09
ENSMUSG00000057054	Inca1	116.874	105.492	56.4272	51.4794	-1.06673	1.14467e-09
ENSMUSG00000031129	Slc9a9	218.603	123.594	116.472	76.3555	-0.894866	1.17297e-09
ENSMUSG00000037685	Atp8a1	1767.25	1685.78	1141.72	1254.56	-0.628812	1.17432e-09
ENSMUSG00000024206	Rfx2	686.075	667.84	408.423	359.158	-0.745314	1.19526e-09
ENSMUSG00000024975	Pdcd4	1453.28	1395.45	905.057	888.236	-0.681541	1.22278e-09
ENSMUSG00000004360	9330159F19Rik	218.119	129.504	107.209	82.5298	-1.01389	1.28629e-09
ENSMUSG00000066058	Cldn19	72.8128	46.8094	28.2734	22.9461	-1.41694	1.2975e-09
ENSMUSG00000039372	March4	256.247	193.898	143.997	137.548	-0.814818	1.33315e-09
ENSMUSG00000031373	Car5b	322.181	267.746	187.355	162.343	-0.780597	1.3524e-09
ENSMUSG00000028838	Extl1	113.502	268.475	35.1044	163.532	-1.67453	1.38912e-09
ENSMUSG00000029245	Epha5	331.777	253.339	171.523	101.992	-0.944073	1.40268e-09
ENSMUSG00000099767	Gm28884	39.1159	9.51485	11.6114	0.828954	-1.75354	1.4167e-09
ENSMUSG00000037971	1110032A03Rik	451.495	325.313	277.914	227.498	-0.696946	1.49105e-09
ENSMUSG00000045092	S1pr1	2598.51	3640.45	1747.66	2830.44	-0.569618	1.64639e-09
ENSMUSG00000085133	B930095G15Rik	647.452	468.32	409.874	327.158	-0.660585	1.72317e-09
ENSMUSG00000024413	Npc1	3670.18	3036.74	2496.36	2078.17	-0.553682	1.77942e-09
ENSMUSG00000022199	Slc22a17	2309.76	1990.71	1242.24	1157.14	-0.892851	1.84397e-09
ENSMUSG00000002980	Bcam	278.033	314.987	165.483	170.776	-0.741945	1.94073e-09
ENSMUSG00000052188	Gm14964	89.1251	53.6211	40.678	25.7459	-1.13253	1.95932e-09
ENSMUSG00000040428	Plekha4	460.394	1837.74	286.074	989.804	-0.686835	1.97305e-09
ENSMUSG00000009739	Pou6f1	1957.1	1842.87	1268.57	1223.3	-0.623917	1.97494e-09
ENSMUSG00000019767	Ccdc170	107.752	58.0146	47.9072	26.8811	-1.15614	2.0184e-09
ENSMUSG00000027993	Trim2	2194.27	2112.7	1436.84	1306.54	-0.608696	2.0398e-09
ENSMUSG00000058756	Thra	3224.73	2906.86	2042.12	1638.61	-0.657349	2.20732e-09
ENSMUSG00000017009	Sdc4	8856.76	13584.6	6108.45	10782.5	-0.534171	2.32737e-09
ENSMUSG00000041794	Myrip	56.8564	21.926	19.2696	12.6518	-1.52737	2.47137e-09
ENSMUSG00000042425	Frmpd3	444.406	295.054	244.894	144.109	-0.862826	2.58721e-09
ENSMUSG00000022214	Dcaf11	1018.13	1128.42	671.455	807.978	-0.59928	2.72938e-09
ENSMUSG00000093452	Zfhx2os	159.016	154.35	81.1351	66.2844	-0.941539	2.7834e-09
ENSMUSG00000052861	Dnah6	105.837	42.2831	41.9784	19.6952	-1.33707	2.90206e-09
ENSMUSG00000034714	Ttyh2	1711.74	1474.9	1087.53	1309.57	-0.652195	2.97565e-09
ENSMUSG00000021338	Carmil1	1318.22	1383.05	851.795	941.318	-0.628747	2.99142e-09
ENSMUSG00000038855	Itpkb	2736.55	3925.58	1829.59	2391.65	-0.578263	3.10844e-09
ENSMUSG00000032377	Plscr4	180.292	95.0094	100.596	50.2848	-0.836375	3.17178e-09
ENSMUSG00000020658	Efr3b	532.76	657.673	304.05	348.851	-0.805696	3.18634e-09
ENSMUSG00000029166	Mapre3	1002.43	899.932	647.3	534.006	-0.629638	3.25739e-09
ENSMUSG00000039865	Slc44a3	41.3458	40.9473	12.9578	35.9664	-1.60512	3.32626e-09
ENSMUSG00000041930	Fam222a	75.6856	35.8325	33.1561	19.7292	-1.19071	3.42764e-09
ENSMUSG00000021608	Lpcat1	3229.83	3526.78	2214.22	2332	-0.543337	3.4898e-09
ENSMUSG00000030894	Tpp1	2880.44	2699.98	1893.28	1916.87	-0.603076	3.50558e-09
ENSMUSG00000004207	Psap	17323.7	17809.9	11702.5	11547.8	-0.564264	3.53254e-09
ENSMUSG00000049624	Slc17a5	617.515	551.027	400.324	342.251	-0.623735	3.54793e-09
ENSMUSG00000001768	Rin2	1004.83	871.146	659.208	579.597	-0.604149	3.64275e-09
ENSMUSG00000022218	Tgm1	491.083	2124.17	299.258	1204.29	-0.716265	3.77986e-09
ENSMUSG00000074892	B3galt5	77.0061	26.273	29.5482	6.44335	-1.39021	3.78054e-09
ENSMUSG00000055809	Dnaaf3	290.577	355.995	173.051	232.037	-0.742219	4.01853e-09
ENSMUSG00000053552	Ebf4	335.871	398.523	202.174	240.113	-0.718699	4.17018e-09
ENSMUSG00000029119	Man2b2	1267.65	1295.74	809.026	817.044	-0.646336	4.20112e-09
ENSMUSG00000032849	Abcc4	597.769	608.959	375.006	374.836	-0.667824	4.34872e-09
ENSMUSG00000024302	Dtna	2352.28	1997.17	1558.91	1333.93	-0.59079	4.44363e-09
ENSMUSG00000021991	Cacna2d3	56.877	36.4276	20.0209	17.1122	-1.46396	4.52418e-09
ENSMUSG00000031378	Abcd1	947.93	805.184	602.145	457.048	-0.653041	4.55729e-09
ENSMUSG00000063160	Numbl	2107.8	2409.14	1298.8	1282.46	-0.695883	4.56674e-09
ENSMUSG00000026944	Abca2	2571.33	3261.53	1642.23	1903.36	-0.644917	4.6239e-09
ENSMUSG00000050587	Lrrc4c	454.799	367.134	273.128	232.958	-0.733826	4.66009e-09
ENSMUSG00000022382	Wnt7b	3814.7	2445.93	2308.65	1515.98	-0.722792	4.73409e-09
ENSMUSG00000005237	Dnah2	229.893	209.56	119.932	115.087	-0.92772	4.93212e-09
ENSMUSG00000104346	Pcdhga3	541.097	451.081	340.395	251.685	-0.669383	5.06779e-09
ENSMUSG00000052911	Lamb2	5733.99	5750.99	4009.29	3723.09	-0.514435	5.15243e-09
ENSMUSG00000022758	P2rx6	243.867	148.787	129.99	61.1484	-0.888267	5.19852e-09
ENSMUSG00000058153	Sez6l	202.357	139.903	112.272	76.6339	-0.828092	5.49319e-09
ENSMUSG00000032356	Rasgrf1	221.204	204.325	128.182	125.308	-0.78635	5.72779e-09
ENSMUSG00000046186	Cd109	10644	13110.9	7102.48	8363.67	-0.582018	5.79036e-09
ENSMUSG00000008305	Tle1	1700.22	1421.61	1162.56	1143.99	-0.546403	6.00978e-09
ENSMUSG00000029843	Slc13a4	32.8993	16.8474	9.09633	7.60032	-1.86865	6.01452e-09
ENSMUSG00000020963	Tshr	118.679	100.133	56.8309	44.3647	-1.07435	6.03542e-09
ENSMUSG00000022490	Ppp1r1a	966.862	855.023	589.76	636.848	-0.71417	6.09831e-09
ENSMUSG00000004031	Brinp2	494.229	268.811	303.906	157.307	-0.693902	6.33639e-09
ENSMUSG00000031618	Nr3c2	254.505	213.014	143.888	98.4692	-0.809779	6.47958e-09
ENSMUSG00000024187	Fam234a	1569.14	1362.36	1009.96	935.779	-0.633434	6.76798e-09
ENSMUSG00000059824	Dbp	1331.93	1272.82	809.469	598.171	-0.716761	7.31476e-09
ENSMUSG00000041809	Efhc1	231.315	179.392	135.096	135.306	-0.773578	7.35168e-09
ENSMUSG00000098284	A330093E20Rik	24.0874	8.5717	4.23458	3.53259	-2.63362	7.3883e-09
ENSMUSG00000039809	Gabbr2	171.442	98.7263	93.29	68.3315	-0.892831	7.42841e-09
ENSMUSG00000065979	Cpped1	1435.15	1312.85	961.868	884.422	-0.573272	7.72999e-09
ENSMUSG00000048249	Crebrf	415.27	430.38	215.294	206.56	-0.949416	7.74339e-09
ENSMUSG00000022240	Ctnnd2	4295.81	3194.87	2970.52	2389.03	-0.530296	7.76501e-09
ENSMUSG00000045348	Nyap1	511.284	527.245	307.138	277.949	-0.72987	8.35974e-09
ENSMUSG00000006784	Ttc25	295.065	247.133	176.691	127.389	-0.73256	8.36419e-09
ENSMUSG00000030256	Bhlhe41	1867.87	2672.99	1253.98	1717.24	-0.573291	8.56804e-09
ENSMUSG00000036545	Adamts2	684.584	490.249	439.25	325.754	-0.639327	9.80328e-09
ENSMUSG00000073910	Mob3b	531.93	365.326	336.873	184.402	-0.65622	9.99121e-09
ENSMUSG00000052632	Asap2	1737.65	1831	1195.56	1479.18	-0.538465	9.99121e-09
ENSMUSG00000037890	Wdr19	1266.5	1005.98	800.165	659.165	-0.660107	1.0118e-08
ENSMUSG00000025875	Tspan17	306.685	236.307	175.784	137.202	-0.787664	1.02286e-08
ENSMUSG00000021371	Mcur1	1472.76	1092.44	989.434	797.411	-0.571318	1.07868e-08
ENSMUSG00000038546	Ranbp9	2937.43	2078.53	1978.88	1444.74	-0.568697	1.08201e-08
ENSMUSG00000037344	Slc12a9	855.885	688.907	536.643	468.588	-0.668357	1.10037e-08
ENSMUSG00000062901	Klhl24	2585.75	2753.51	1735.25	1846.57	-0.573701	1.10116e-08
ENSMUSG00000066595	Mfsd7b	726.027	461.353	476.516	377.256	-0.60494	1.25947e-08
ENSMUSG00000109305	1810010D01Rik	29.0922	37.211	7.13008	10.2296	-1.94639	1.33744e-08
ENSMUSG00000050122	Vwa3b	126.484	133.235	66.7225	66.3178	-0.92375	1.36334e-08
ENSMUSG00000063646	Jakmip1_1	25.1637	4.56435	5.64543	0	-2.25351	1.37655e-08
ENSMUSG00000036334	Igsf10	2123.33	2480.71	1331.63	1609.48	-0.670057	1.37939e-08
ENSMUSG00000042564	Fam227a	336.971	219.01	170.256	110.639	-0.965723	1.40186e-08
ENSMUSG00000026679	Enkur	433.595	344.056	234.393	174.981	-0.88306	1.42638e-08
ENSMUSG00000030207	Fam234b	2989.34	2260.04	2073.96	1408.47	-0.525393	1.48946e-08
ENSMUSG00000006476	Nsmf	2925.43	2149.59	1868.69	1559.2	-0.644902	1.49498e-08
ENSMUSG00000063415	Cyp26b1	397.358	645.461	241.234	336.283	-0.714675	1.49836e-08
ENSMUSG00000022324	Matn2	1270.68	1439.45	834.589	949.838	-0.603631	1.52875e-08
ENSMUSG00000037664	Cdkn1c	308.362	224.514	180.172	126.59	-0.780199	1.53239e-08
ENSMUSG00000033065	Pfkm	5200.22	4575.24	3597.56	2922.63	-0.529726	1.57529e-08
ENSMUSG00000038704	Aspdh	50.258	30.0809	16.3141	17.8736	-1.57054	1.62517e-08
ENSMUSG00000028048	Gba	960.383	985.784	647.184	779.486	-0.567728	1.68746e-08
ENSMUSG00000004791	Pgf	204.451	266.09	117.673	221.984	-0.795666	1.70305e-08
ENSMUSG00000037235	Mxd4	1870.95	1482.36	1110.74	894.342	-0.750244	1.77625e-08
ENSMUSG00000052040	Klf13	3078.56	2369.84	1845.66	1443.62	-0.736461	1.85028e-08
ENSMUSG00000028383	Hsdl2	1811.92	1290.44	1229.33	894.44	-0.559176	1.92701e-08
ENSMUSG00000090150	Acad11	726.717	650.686	485.993	396.863	-0.577917	1.99451e-08
ENSMUSG00000028923	Necap2	1748.84	1505.35	1152.36	1041.21	-0.600979	2.00261e-08
ENSMUSG00000050965	Prkca	3238.33	2962.56	2267.43	2105.81	-0.51241	2.05672e-08
ENSMUSG00000027947	Il6ra	212.905	270.254	122.304	182.658	-0.787074	2.12286e-08
ENSMUSG00000039217	Il18	154.026	217.993	82.2527	167.203	-0.900389	2.16363e-08
ENSMUSG00000022861	Dgkg	113.828	117.315	38.9562	56.7621	-1.50077	2.29531e-08
ENSMUSG00000040612	Ildr2	7030.58	5208.63	4920.88	3186.05	-0.512929	2.34823e-08
ENSMUSG00000037280	Galnt6	61.7872	85.6376	24.7398	34.1189	-1.33544	2.42491e-08
ENSMUSG00000045776	Lrtm1	47.5233	14.0755	16.2659	3.7521	-1.50975	2.47377e-08
ENSMUSG00000027223	Mapk8ip1	2881.19	1820.15	1797.86	1319.67	-0.678705	2.82179e-08
ENSMUSG00000074981	Dcdc5	16.3017	9.09994	2.32597	4.25031	-2.88277	2.83819e-08
ENSMUSG00000034614	Pik3ip1	873.409	934.895	572.544	675.548	-0.611889	2.85114e-08
ENSMUSG00000094800	Gm9780	12.9811	25.7996	0.350375	2.86145	-5.28524	3.10279e-08
ENSMUSG00000016995	Matn4	42.5137	19.0232	14.9056	6.85783	-1.51914	3.11148e-08
ENSMUSG00000023572	Ccndbp1	546.67	491.528	360.21	375.783	-0.599138	3.16521e-08
ENSMUSG00000019320	Noxo1	119.786	105.288	58.0597	66.9028	-1.04106	3.30736e-08
ENSMUSG00000032549	Rab6b	887.963	831.827	570.541	632.986	-0.634169	3.41519e-08
ENSMUSG00000035722	Abca7	515.272	413.899	329.858	328.432	-0.644454	3.4529e-08
ENSMUSG00000027510	Rbm38	412.599	538.418	244.002	316.784	-0.757137	3.65501e-08
ENSMUSG00000051344	Plekhm3	422.341	332.569	249.11	206.829	-0.760479	3.67667e-08
ENSMUSG00000053161	Daw1	83.1893	55.0414	35.5304	27.2802	-1.2208	3.94461e-08
ENSMUSG00000020653	Klf11	249.724	216.478	149.874	149.082	-0.74824	4.10596e-08
ENSMUSG00000035805	Mlc1	10464.9	9045.18	7118.81	5473.95	-0.554106	4.22733e-08
ENSMUSG00000034324	Tmem132c	384.211	307.878	241.876	171.785	-0.662093	4.3087e-08
ENSMUSG00000046607	Hrk	34.7594	16.7982	11.2057	9.69747	-1.6974	4.37173e-08
ENSMUSG00000038233	Fam198a	55.4054	13.1881	21.6921	12.2032	-1.35811	4.41189e-08
ENSMUSG00000001604	Tcea3	119.7	180.524	63.221	66.4041	-0.903322	4.58034e-08
ENSMUSG00000055782	Abcd2	385.777	230.017	198.103	164.951	-0.963747	4.7484e-08
ENSMUSG00000042429	Adora1	2432.37	2549.31	1671.53	1213.76	-0.538082	4.81633e-08
ENSMUSG00000030518	Fam189a1	124.128	76.4856	53.5807	42.4684	-1.2115	4.8805e-08
ENSMUSG00000057778	Cyb5d2	442.392	336.68	278.984	217.219	-0.654284	4.92439e-08
ENSMUSG00000061517	Sox21	1014.78	579.348	692.031	372.238	-0.551782	5.04389e-08
ENSMUSG00000007476	Lrrc8a	1777.19	2068.84	1137.4	1407.93	-0.64232	5.10952e-08
ENSMUSG00000000876	Pxmp4	627.619	598.126	404.831	340.695	-0.630319	5.26619e-08
ENSMUSG00000079557	March2	750.017	580.757	487.453	432.972	-0.616432	5.33305e-08
ENSMUSG00000020639	Pfn4	183.898	104.749	105.582	59.596	-0.806194	5.37285e-08
ENSMUSG00000003436	Dll3	74.3151	35.3191	32.0587	30.0797	-1.19482	5.41179e-08
ENSMUSG00000035179	Ppp1r32	34.1618	26.8746	10.4819	9.8989	-1.68786	5.57121e-08
ENSMUSG00000020723	Cacng4	986.074	692.37	664.306	534.197	-0.566795	5.66062e-08
ENSMUSG00000023886	Smoc2	225.728	158.835	127.195	144.12	-0.848871	5.6908e-08
ENSMUSG00000047030	Spata2	779.902	747.961	520.012	543.145	-0.578912	5.77388e-08
ENSMUSG00000051041	Olfml1	195.404	149.347	110.9	79.6587	-0.805155	5.82851e-08
ENSMUSG00000033124	Atg9a	1624.95	1631.56	1026.43	961.19	-0.66101	5.90291e-08
ENSMUSG00000016946	Kctd5	1905.21	1239.17	1333	1048.54	-0.513387	5.92153e-08
ENSMUSG00000037306	Man1c1	1746.44	1204.4	1137.61	853.856	-0.616103	5.95177e-08
ENSMUSG00000021219	Rgs6	129.953	65.9208	69.1638	53.7554	-0.90911	6.01322e-08
ENSMUSG00000047205	Dusp18	1281.79	948.414	829.071	635.214	-0.625314	6.02785e-08
ENSMUSG00000006576	Slc4a3	761.606	612.073	512.46	465.853	-0.566755	6.10345e-08
ENSMUSG00000050640	Tmem150c	67.5529	60.9156	29.2327	32.5943	-1.17854	6.36095e-08
ENSMUSG00000030889	Vwa3a	125.266	89.0359	62.3795	46.8171	-1.01496	6.39289e-08
ENSMUSG00000038518	Jarid2	1314.57	1224.04	910.752	807.133	-0.5274	6.50023e-08
ENSMUSG00000028373	Astn2	211.789	199.799	122.157	123.774	-0.780942	6.79399e-08
ENSMUSG00000031399	Fam3a	482.646	495.068	310.16	335.748	-0.628798	7.2269e-08
ENSMUSG00000054226	Tprkb	1279.02	738.022	780.314	533.053	-0.710814	7.28879e-08
ENSMUSG00000034757	Tmub2	862.719	794.997	568.042	529.29	-0.596057	7.36287e-08
ENSMUSG00000045064	Zc2hc1c	168.45	133.491	97.4905	94.6866	-0.78933	7.48124e-08
ENSMUSG00000000532	Acvr1b	1471.09	2200.15	979.533	994.645	-0.583644	7.60949e-08
ENSMUSG00000047686	Zcchc5	55.9822	74.513	21.7639	24.1591	-1.30293	7.68311e-08
ENSMUSG00000034563	Ccpg1	1676.04	1446.7	1155.38	963.474	-0.534539	7.68825e-08
ENSMUSG00000041958	Pigs	2523.35	2086.32	1644.11	1439.54	-0.616259	7.91717e-08
ENSMUSG00000020100	Slc29a3	1075.85	1095.56	726.498	643.554	-0.563253	8.03764e-08
ENSMUSG00000015149	Sirt2	2821.11	2745.98	1903.06	1812.56	-0.566137	8.77559e-08
ENSMUSG00000041351	Rap1gap	1125.04	767.486	674.311	443.156	-0.737359	8.83031e-08
ENSMUSG00000039410	Prdm16	1278.01	1033.48	850.555	878.503	-0.585289	8.88097e-08
ENSMUSG00000041556	Fbxo2	1069.35	710.425	578.127	483.483	-0.886973	9.07564e-08
ENSMUSG00000062591	Tubb4a	245.799	218.953	146.348	140.808	-0.73784	9.31213e-08
ENSMUSG00000037946	Fgd3	415.549	356.399	270.991	325.44	-0.614871	9.61413e-08
ENSMUSG00000030790	Adm	1258.25	1779.62	867.102	1337.16	-0.53686	9.64171e-08
ENSMUSG00000084915	C230037L18Rik	146.005	117.162	81.5267	61.9897	-0.838426	9.69201e-08
ENSMUSG00000073650	Catip	236.794	160.554	143.067	99.0142	-0.724337	9.85727e-08
ENSMUSG00000017167	Cntnap1	222.164	333.295	135.271	311.213	-0.711628	9.90252e-08
ENSMUSG00000090394	4930523C07Rik	398.668	706.088	247.061	473.613	-0.683151	1.01761e-07
ENSMUSG00000020827	Mink1	2777.15	2561.5	1896.15	2069.24	-0.549058	1.01924e-07
ENSMUSG00000009376	Met	1219.68	1873.84	815.891	1439.02	-0.575338	1.05454e-07
ENSMUSG00000023960	Enpp5	1402.45	1312.32	964.73	925.027	-0.536042	1.08479e-07
ENSMUSG00000060572	Mfap2	756.096	549.008	492.995	384.471	-0.615419	1.09875e-07
ENSMUSG00000034708	Grn	2531.96	2718.4	1703.95	1818.19	-0.570149	1.10138e-07
ENSMUSG00000043629	1700019D03Rik	78.4673	48.2046	37.8518	33.8375	-1.06172	1.18689e-07
ENSMUSG00000017132	Cyth1	505.179	446.956	318.744	327.062	-0.657285	1.23848e-07
ENSMUSG00000029456	Acad10	208.15	190.501	113.113	91.8056	-0.875378	1.25241e-07
ENSMUSG00000028469	Npr2	1403.83	1410.36	965.641	833.319	-0.535689	1.29676e-07
ENSMUSG00000037902	Sirpa	1518.6	1601.2	1056.33	1414.09	-0.520824	1.33857e-07
ENSMUSG00000029003	Mad2l2	487.992	437.692	323.779	348.532	-0.593086	1.34539e-07
ENSMUSG00000038695	Josd2	783.522	709.932	453.886	486.869	-0.787939	1.37325e-07
ENSMUSG00000053702	Nebl	2227.5	1871.28	1441.49	1331.93	-0.625619	1.40841e-07
ENSMUSG00000086810	Gm13110	88.6311	83.6074	43.9424	27.7747	-0.989091	1.40912e-07
ENSMUSG00000004798	Ulk2	2143.04	1689.41	1496.13	1223.88	-0.515488	1.40912e-07
ENSMUSG00000042510	AA986860	268.985	222.822	159.815	154.927	-0.740129	1.41409e-07
ENSMUSG00000032633	Flcn	777.43	794.261	523.039	495.329	-0.568074	1.43227e-07
ENSMUSG00000055435	Maf	811.916	713.432	537.291	467.372	-0.598396	1.44692e-07
ENSMUSG00000031930	Wwp2	1075.8	793.176	711.975	616.059	-0.594752	1.46058e-07
ENSMUSG00000040724	Kcna2	868.932	527.945	572.305	283.786	-0.599738	1.57453e-07
ENSMUSG00000041598	Cdc42ep4	2366.99	1367.02	1562.83	1233.47	-0.597578	1.57453e-07
ENSMUSG00000014905	Dnajb9	670.877	638.494	444.12	500.707	-0.59383	1.59054e-07
ENSMUSG00000039706	Ldb2	100.642	55.0684	49.5807	33.1292	-1.01955	1.61222e-07
ENSMUSG00000030089	Slc41a3	172.059	133.792	94.9456	106.751	-0.858616	1.62201e-07
ENSMUSG00000112478	AC153370.2	2847.02	3286.15	1951.61	1914.75	-0.542632	1.62324e-07
ENSMUSG00000018334	Ksr1	1009.66	1333.77	605.716	708.856	-0.736842	1.647e-07
ENSMUSG00000021867	Tmem254b	557.212	553.226	119.623	86.8225	-2.22356	1.79204e-07
ENSMUSG00000034227	Foxj1	4881.29	4860.66	2966.12	2723.62	-0.717097	1.80595e-07
ENSMUSG00000017760	Ctsa	2666.78	3102.47	1759.51	2073.33	-0.59876	1.83388e-07
ENSMUSG00000000538	Tom1l2	2500.4	2044.88	1637.41	1235.22	-0.608824	1.9215e-07
ENSMUSG00000022235	Cmbl	86.851	43.5975	42.2201	20.5242	-1.06706	1.95153e-07
ENSMUSG00000020037	Rfx4	2407.26	1757.52	1621.91	1162.15	-0.566869	1.95795e-07
ENSMUSG00000073096	Lrrc61	425.512	404.362	273.857	275.782	-0.628464	1.97113e-07
ENSMUSG00000031273	Col4a6	4171.99	4887.42	2923.84	3288.69	-0.51084	1.97907e-07
ENSMUSG00000106379	Lhfpl3	96.3774	76.39	44.8413	38.2332	-1.08813	1.97964e-07
ENSMUSG00000042978	Sbk1	1466.47	1206.59	942.63	846.141	-0.636508	1.99168e-07
ENSMUSG00000040936	Ulk4	380.257	300.156	248.568	236.331	-0.606596	2.02662e-07
ENSMUSG00000027488	Snta1	910.468	754.88	510.061	384.019	-0.835238	2.04843e-07
ENSMUSG00000020474	Polm	271.695	315.008	170.308	180.771	-0.661847	2.10161e-07
ENSMUSG00000024308	Tapbp	1488.08	4407.25	1001.05	3018.44	-0.571909	2.11204e-07
ENSMUSG00000029528	Pxn	2098.05	2759.54	1307.33	1659.97	-0.680767	2.22008e-07
ENSMUSG00000032875	Arhgef17	5363.79	10528	3754.16	7388.48	-0.512825	2.27229e-07
ENSMUSG00000020829	Slc46a1	219.279	142.328	127.157	107.447	-0.771927	2.29514e-07
ENSMUSG00000026725	Tnn	187.039	2094.41	91.0955	1128.54	-1.0293	2.45955e-07
ENSMUSG00000029512	Ulk1	1526.93	1338.73	929.783	764.07	-0.71352	2.53495e-07
ENSMUSG00000040364	Sec1	10.3848	3.68342	0.659289	0.414477	-3.71487	2.53663e-07
ENSMUSG00000025969	Nrp2	2117.68	1902.78	1463.83	1441.55	-0.529656	2.56065e-07
ENSMUSG00000020524	Gria1	1363.96	949.438	954.517	690.823	-0.512745	2.71769e-07
ENSMUSG00000032737	Inppl1	5320.73	4291.82	3692.25	3204.21	-0.525462	2.73382e-07
ENSMUSG00000046312	AI464131	644.897	914.066	434.677	610.658	-0.564455	2.82114e-07
ENSMUSG00000047988	4933428G20Rik	55.3624	34.0289	21.9689	11.6309	-1.34468	2.9192e-07
ENSMUSG00000043964	Orai3	471.008	399.26	312.781	339.339	-0.581817	2.92827e-07
ENSMUSG00000033453	Adamts15	276.793	125.989	174.75	52.4662	-0.658882	2.92827e-07
ENSMUSG00000034390	Cmip	1390.76	2106.77	948.11	1410.13	-0.550499	2.93147e-07
ENSMUSG00000037627	Rgs22	76.8986	72.8189	37.9463	35.5269	-1.02718	2.95849e-07
ENSMUSG00000063867	Olfr1511	19.6397	16.7851	4.05028	10.5482	-2.13055	2.96862e-07
ENSMUSG00000028801	Stpg1	36.396	29.8905	12.5705	7.6127	-1.49638	3.10749e-07
ENSMUSG00000035615	Frmpd1	429.903	427.257	286.685	181.277	-0.583173	3.13901e-07
ENSMUSG00000033880	Lgals3bp	209.942	2337.42	127.749	1675.77	-0.712544	3.17152e-07
ENSMUSG00000066440	Zfyve26	804.324	876.279	544.155	665.744	-0.559206	3.20799e-07
ENSMUSG00000023186	Vwa5a	2011.34	2311.37	1375.29	1668.79	-0.546851	3.26267e-07
ENSMUSG00000036295	Lrrn3	1089.79	704.506	708.855	644.915	-0.618397	3.45056e-07
ENSMUSG00000001418	Glmp	1092.54	1000.61	704.88	741.081	-0.63165	3.49e-07
ENSMUSG00000030337	Vamp1	452.339	466.552	288.933	252.322	-0.63917	3.49443e-07
ENSMUSG00000040147	Maob	102.96	189.291	53.1125	80.7822	-0.948867	3.5554e-07
ENSMUSG00000022620	Arsa	821.477	848.35	538.375	573.501	-0.609078	3.65553e-07
ENSMUSG00000036833	Pnpla7	319.535	294.03	190.35	201.894	-0.737135	3.6812e-07
ENSMUSG00000008140	Emc10	2616.58	2807.76	1504.08	1678.78	-0.797192	3.73005e-07
ENSMUSG00000066196	Spag8	83.0691	49.5943	35.1019	20.2333	-1.22388	3.74821e-07
ENSMUSG00000025352	Gdf11	941.262	594.86	647.141	466.617	-0.536219	3.80601e-07
ENSMUSG00000035910	Dcdc2a	120.423	55.5325	54.6083	24.0444	-1.13816	4.13014e-07
ENSMUSG00000071757	Zhx2	1999.81	2013.07	1387.8	1407.25	-0.525349	4.28453e-07
ENSMUSG00000052914	Cyp2j6	569.505	402.366	373.67	336.574	-0.605579	4.3758e-07
ENSMUSG00000024654	Asrgl1	5025.03	2957.91	3478.37	1921.09	-0.528926	4.38315e-07
ENSMUSG00000022440	C1qtnf6	1456.94	1284.38	968.109	781.271	-0.586262	4.45379e-07
ENSMUSG00000030409	Dmpk	1029.04	999.53	698.495	555.579	-0.55382	4.57251e-07
ENSMUSG00000089989	Gm45713	10.6449	0	0	11.3963	-6.80973	4.83032e-07
ENSMUSG00000078716	Tmem8b	871.575	816.572	600.204	515.359	-0.534127	4.89163e-07
ENSMUSG00000008540	Mgst1	476.375	551.056	320.245	389.348	-0.572178	4.91945e-07
ENSMUSG00000026113	Inpp4a	946.524	1043.57	629.106	625.609	-0.585062	5.02531e-07
ENSMUSG00000022540	Rogdi	359.408	265.957	234.211	255.612	-0.615995	5.04296e-07
ENSMUSG00000027215	Cd82	353.202	530.049	227.436	366.649	-0.63276	5.05526e-07
ENSMUSG00000103677	Pcdhga4	258.227	233.022	163.501	142.553	-0.662144	5.16627e-07
ENSMUSG00000023224	Serping1	244.634	413.093	153.001	234.99	-0.67679	5.34637e-07
ENSMUSG00000039474	Wfs1	759.367	566.326	501.547	472.34	-0.59626	5.39596e-07
ENSMUSG00000060176	Kif27	441.027	327.565	263.563	172.536	-0.74136	5.44847e-07
ENSMUSG00000034247	Plekhm1	608.856	614.426	399.481	466.772	-0.603766	5.48634e-07
ENSMUSG00000021379	Id4	981.835	521.246	638.692	371.895	-0.615565	5.56237e-07
ENSMUSG00000040010	Slc7a5	5002.58	3425.81	3464.76	2956.63	-0.527963	5.82452e-07
ENSMUSG00000026650	Meig1	73.606	44.4562	32.153	36.6467	-1.22564	5.84552e-07
ENSMUSG00000027408	Cpxm1	651.107	549.205	440.431	388.577	-0.557389	5.93794e-07
ENSMUSG00000039713	Plekhg5	405.084	302.757	268.628	210.986	-0.597375	5.96365e-07
ENSMUSG00000020682	Mmp28	137.358	120.53	76.9741	62.7947	-0.827142	6.05994e-07
ENSMUSG00000090086	AI480526	741.261	673.045	471.537	338.223	-0.651607	6.12424e-07
ENSMUSG00000004637	Wwox	390.276	362.934	258.084	276.521	-0.601425	6.13416e-07
ENSMUSG00000044167	Foxo1	1106.63	1058.32	750.934	679.825	-0.556659	6.15661e-07
ENSMUSG00000022361	Zhx1	3685.06	2071.24	2557.8	1633.79	-0.525479	6.19555e-07
ENSMUSG00000037206	Islr	1436.72	1517.88	890.875	960.754	-0.687392	6.27643e-07
ENSMUSG00000034858	Fam214a	789.07	665.433	544.464	446.891	-0.535984	6.39686e-07
ENSMUSG00000006575	Rundc3a	421.811	314.823	282.098	265.977	-0.575655	6.51276e-07
ENSMUSG00000028369	Svep1	491.486	420.14	324.434	222.16	-0.59931	6.52153e-07
ENSMUSG00000017144	Rnd3	2520.68	3088.89	1719.41	2101.7	-0.549874	6.59851e-07
ENSMUSG00000005580	Adcy9	320.438	262.234	203.694	123.519	-0.659811	6.71725e-07
ENSMUSG00000038286	Bphl	486.112	435.539	329.154	265.848	-0.564924	6.73289e-07
ENSMUSG00000021567	Nkd2	258.191	215.049	163.506	151.594	-0.645998	6.96229e-07
ENSMUSG00000045259	Klhdc9	169.859	148.783	100.683	105.236	-0.743915	6.97976e-07
ENSMUSG00000000567	Sox9	6237.75	6373.37	3961.77	3994.05	-0.653259	6.97976e-07
ENSMUSG00000025175	Fn3k	36.7001	28.6876	12.9001	7.68678	-1.51893	7.13267e-07
ENSMUSG00000038065	Mturn	191.711	197.164	111.352	85.5421	-0.769859	7.43784e-07
ENSMUSG00000056073	Grik2	161.467	142.264	91.7799	80.8156	-0.839328	7.63069e-07
ENSMUSG00000047617	Paxx	199.527	197.34	109.259	117.154	-0.85035	8.7166e-07
ENSMUSG00000003762	Coq8b	1474.11	1461.7	927.305	931.769	-0.668013	9.24175e-07
ENSMUSG00000075592	Nynrin	1210.45	978.744	827.875	712.806	-0.547022	9.26159e-07
ENSMUSG00000037887	Dusp8	310.747	401.559	173.179	282.171	-0.836723	9.27839e-07
ENSMUSG00000030956	Fam53b	1054.81	990.409	685.485	599.346	-0.618276	9.351e-07
ENSMUSG00000023966	Rsph9	198.918	196.041	117.984	122.245	-0.74072	9.37656e-07
ENSMUSG00000048402	Gli2	1009.48	736.649	695.73	623.742	-0.536615	9.40817e-07
ENSMUSG00000023999	Kif6	217.397	146.545	130.598	82.0226	-0.748054	9.55374e-07
ENSMUSG00000097730	Gm26588	22.6075	9.56407	5.93362	0.57229	-2.08458	9.80208e-07
ENSMUSG00000044641	Pard6b	394.677	677.757	249.449	424.873	-0.661269	9.84133e-07
ENSMUSG00000047123	Ticam1	510.99	453.258	308.187	274.325	-0.727313	1.02289e-06
ENSMUSG00000032878	Ccdc85a	135.061	95.999	67.0979	39.0129	-1.02305	1.04339e-06
ENSMUSG00000026510	Trp53bp2	1082.01	728.633	726.309	591.999	-0.574016	1.05205e-06
ENSMUSG00000073725	Lmbrd1	1428.66	1153.14	973.61	800.621	-0.550791	1.05521e-06
ENSMUSG00000020121	Srgap1	1346.7	961.115	926.201	691.392	-0.538377	1.06651e-06
ENSMUSG00000039021	Ttc16	147.124	106.351	86.9742	49.5611	-0.744707	1.0821e-06
ENSMUSG00000026648	Dclre1c	346.656	288.108	213.457	214.095	-0.69516	1.08219e-06
ENSMUSG00000039062	Anpep	255.839	206.792	157.463	113.411	-0.705037	1.12157e-06
ENSMUSG00000011171	Vipr2	24.8907	27.6088	6.8189	15.1729	-1.84614	1.1261e-06
ENSMUSG00000040557	Mettl27	251.673	264.746	147.526	154.604	-0.753522	1.14453e-06
ENSMUSG00000035295	Wdr38	47.3871	30.8272	19.4723	10.551	-1.23072	1.1817e-06
ENSMUSG00000017677	Wsb1	4935.67	4688.49	3404.19	3689.59	-0.534238	1.23732e-06
ENSMUSG00000033726	Emx1	27.1377	19.9636	8.46257	9.52134	-1.63954	1.26886e-06
ENSMUSG00000049562	Ap5b1	128.663	131.749	72.2347	108.638	-0.806463	1.2876e-06
ENSMUSG00000023259	Slc26a6	270.436	199.69	175.928	137.139	-0.618569	1.30277e-06
ENSMUSG00000038248	Sobp	438.784	409.322	286.506	190.79	-0.614084	1.30357e-06
ENSMUSG00000050132	Sarm1	217.091	155.868	123.222	98.0374	-0.80792	1.34391e-06
ENSMUSG00000037706	Cd81	19320.5	19571.1	13166.4	12498.1	-0.551515	1.34863e-06
ENSMUSG00000038206	Fbxo8	553.043	523.836	373.986	376.132	-0.567211	1.36819e-06
ENSMUSG00000053070	9230110C19Rik	360.001	306.847	221.847	187.758	-0.686806	1.36819e-06
ENSMUSG00000032741	Tpcn1	2217.23	1531.57	1532.68	1055.06	-0.531191	1.3685e-06
ENSMUSG00000035919	Bbs9	383.804	288.804	250.882	216.214	-0.608742	1.50178e-06
ENSMUSG00000039109	F13a1	122.178	32.3505	60.5816	21.7921	-0.983958	1.55721e-06
ENSMUSG00000049353	Rd3	48.296	22.235	21.0674	10.304	-1.19042	1.58801e-06
ENSMUSG00000068617	Efcab1	69.6279	39.1948	34.0689	20.0136	-1.01096	1.65912e-06
ENSMUSG00000078490	Cfap74	278.936	191.22	181.173	150.371	-0.619889	1.67995e-06
ENSMUSG00000097801	Gm26777	56.4471	32.3162	25.5859	9.82755	-1.10737	1.69482e-06
ENSMUSG00000063130	Calml3	10.9553	10.4385	1.20558	4.22554	-3.40682	1.70377e-06
ENSMUSG00000068428	Gmnc	89.3217	24.4991	46.5009	7.28469	-0.978378	1.74202e-06
ENSMUSG00000034616	Ssh3	213.253	234.213	134.397	151.997	-0.675357	1.75955e-06
ENSMUSG00000052934	Fbxo31	509.441	432.338	324.349	321.442	-0.642808	1.7871e-06
ENSMUSG00000056938	Acbd4	427.315	409.35	287.006	300.366	-0.571513	1.81977e-06
ENSMUSG00000051113	Fam71e1	113.782	83.5414	43.048	30.3366	-1.41192	1.87972e-06
ENSMUSG00000045777	Ifitm10	1154.9	982.787	713.108	654.203	-0.694926	1.9145e-06
ENSMUSG00000097789	Gm2115	197.35	107.055	119.526	185.498	-0.72194	2.00125e-06
ENSMUSG00000063953	Amd2	33.771	56.858	7.63744	1.67971	-1.98793	2.00497e-06
ENSMUSG00000087259	2610035D17Rik	86.0668	52.7124	44.4035	35.0069	-0.932223	2.01566e-06
ENSMUSG00000071103	1700029J07Rik	331.455	293.666	210.739	196.234	-0.650753	2.01706e-06
ENSMUSG00000048029	Eno4	145.692	108.897	80.6553	60.6048	-0.867945	2.02348e-06
ENSMUSG00000031610	Scrg1	575.227	392.12	307.357	177.753	-0.904984	2.0347e-06
ENSMUSG00000086158	Ccpg1os	323.687	247.718	212.15	151.881	-0.612492	2.06911e-06
ENSMUSG00000037683	Armc3	181.698	110.918	100.408	71.6602	-0.85848	2.17916e-06
ENSMUSG00000006281	Tep1	440.766	431.399	303.386	337.655	-0.539177	2.18733e-06
ENSMUSG00000066537	Vmn2r57	16.4281	9.55662	3.14199	4.61821	-2.3082	2.1958e-06
ENSMUSG00000097209	AU022754	57.5876	30.908	27.446	21.9844	-1.09246	2.2234e-06
ENSMUSG00000092137	Gcom1	137.88	52.2268	64.5901	27.7935	-1.07371	2.26842e-06
ENSMUSG00000055137	Sugct	68.5907	63.3756	33.2231	32.0498	-1.03616	2.32334e-06
ENSMUSG00000047502	Mroh7	20.2387	14.5647	5.15905	10.1432	-2.01023	2.4116e-06
ENSMUSG00000013160	Atp6v0d1	1431.75	1275.62	996.818	964.901	-0.521664	2.41785e-06
ENSMUSG00000087397	Rapgef3os2	26.5399	8.6525	8.18121	12.9429	-1.67745	2.47015e-06
ENSMUSG00000033577	Myo6	8958.69	7123.01	6240.09	4393.25	-0.520113	2.4874e-06
ENSMUSG00000063873	Slc24a3	127.459	75.8961	71.6121	43.6281	-0.810238	2.58947e-06
ENSMUSG00000031755	Bbs2	713.92	588.688	464.729	455.093	-0.614329	2.59131e-06
ENSMUSG00000040473	Cfap69	672.434	551.736	394.037	332.942	-0.767079	2.5976e-06
ENSMUSG00000058740	Kcnt1	61.0328	30.4921	29.1751	13.0044	-1.02179	2.68883e-06
ENSMUSG00000002109	Ddb2	173.447	132.786	97.1312	88.8953	-0.805582	2.82931e-06
ENSMUSG00000021303	Gng4	17.3437	26.4226	3.73454	15.7482	-1.96473	2.83579e-06
ENSMUSG00000022836	Mylk	350.765	250.224	231.606	180.521	-0.595839	2.84061e-06
ENSMUSG00000004267	Eno2	375.262	681.089	246.104	351.526	-0.598833	2.85468e-06
ENSMUSG00000020646	Mboat2	2572.5	2109.39	1790.94	1434.22	-0.52058	2.88654e-06
ENSMUSG00000026632	Tatdn3	307.528	236.982	190.004	157.014	-0.685149	2.899e-06
ENSMUSG00000067279	Ppp1r3c	4166.45	3145.4	2891.33	2222.98	-0.525415	2.92849e-06
ENSMUSG00000032495	Lrrc2	41.5542	25.4126	16.6044	7.87879	-1.39411	2.95562e-06
ENSMUSG00000041660	Bbox1	30.237	12.7202	10.1199	5.01733	-1.62077	2.98716e-06
ENSMUSG00000046807	Lrrc75b	729.241	547.812	508.092	268.938	-0.517203	2.99053e-06
ENSMUSG00000022040	Ephx2	142.931	127.765	67.3797	79.3244	-1.05326	3.02524e-06
ENSMUSG00000040415	Dtx3	1821.42	2041.14	1151.74	1256.8	-0.659571	3.10536e-06
ENSMUSG00000111293	AC125206.2	48.3476	38.6842	21.6069	25.4179	-1.14569	3.1095e-06
ENSMUSG00000039623	Ap5z1	398.087	335.535	271.918	242.873	-0.54991	3.17311e-06
ENSMUSG00000037490	Slc2a12	169.152	166.798	69.2539	92.5766	-1.26119	3.20868e-06
ENSMUSG00000059325	Hopx	340.17	367.318	207.88	322.847	-0.714311	3.30279e-06
ENSMUSG00000007038	Neu1	483.169	488.226	332.935	325.422	-0.537071	3.37545e-06
ENSMUSG00000027238	Frmd5	593.946	678.88	409.586	390.844	-0.532793	3.56262e-06
ENSMUSG00000025892	Gria4	454.982	460.888	298.553	236.563	-0.602318	3.56649e-06
ENSMUSG00000040128	Pnrc1	895.94	1841.4	624.545	1187.96	-0.519483	3.6738e-06
ENSMUSG00000024065	Ehd3	415.599	447.185	263.926	313.151	-0.660102	3.77269e-06
ENSMUSG00000029386	Tctn2	882.453	734.097	566.146	463.721	-0.635628	3.95994e-06
ENSMUSG00000012126	Ubxn11	258.845	240.914	152.152	162.165	-0.753798	4.08108e-06
ENSMUSG00000038060	Dlec1	59.5064	40.4516	25.3321	16.8585	-1.21815	4.10836e-06
ENSMUSG00000110537	Gm4316	461.482	359.34	304.56	239.816	-0.600695	4.10873e-06
ENSMUSG00000030987	Stim1	727.987	626.04	508.345	400.271	-0.511923	4.29256e-06
ENSMUSG00000004110	Cacna1e	99.9232	244.317	49.4841	117.898	-0.97581	4.29581e-06
ENSMUSG00000064225	Paqr9	125.143	112.795	68.4817	58.3922	-0.832807	4.29581e-06
ENSMUSG00000109814	Gm45847	71.7998	94.962	33.2302	27.2735	-1.04428	4.38436e-06
ENSMUSG00000038301	Snx10	965.331	1290.16	640.258	832.212	-0.58924	4.43503e-06
ENSMUSG00000064215	Ifi27	123.986	727.103	69.051	487.326	-0.816167	4.53676e-06
ENSMUSG00000019194	Scn1b	572.949	770.365	381.129	490.448	-0.585444	4.7061e-06
ENSMUSG00000036551	Akap14	29.7248	15.026	8.97674	5.66394	-1.51612	4.72231e-06
ENSMUSG00000046352	Gjb2	34.9703	46.8215	13.4833	20.3017	-1.3783	4.82926e-06
ENSMUSG00000022468	Endou	42.0523	48.2362	17.5081	18.4828	-1.34167	4.96282e-06
ENSMUSG00000061322	Dnaic1	107.19	66.2457	60.4615	37.2341	-0.836027	4.98744e-06
ENSMUSG00000020684	Rasl10b	752.895	494.055	449.977	311.78	-0.741158	4.99486e-06
ENSMUSG00000045333	Zfp423	881.27	707.136	594.123	425.604	-0.568509	5.23577e-06
ENSMUSG00000036278	Macrod1	309.424	312.88	190.112	278.992	-0.710668	5.45839e-06
ENSMUSG00000109394	A230057D06Rik_3	101.805	70.6217	47.6443	40.2343	-1.0844	5.58544e-06
ENSMUSG00000032842	Abcc10	297.252	271.604	195.744	175.553	-0.595512	5.60158e-06
ENSMUSG00000014418	Hps5	862.625	763.279	580.042	521.591	-0.568171	6.05742e-06
ENSMUSG00000097284	4930480K23Rik	102.986	79.1813	56.8885	47.1855	-0.827668	6.0897e-06
ENSMUSG00000034308	Sdr42e1	99.4559	65.5356	51.0355	37.5774	-0.935877	6.11803e-06
ENSMUSG00000041617	Ccdc74a	234.615	170.881	152.546	132.264	-0.631017	6.39839e-06
ENSMUSG00000049404	Rarres1	64.575	70.0415	32.4528	56.5396	-1.01529	6.4294e-06
ENSMUSG00000040488	Ltbp4	1259.34	1454.67	835.73	911.538	-0.590597	6.59403e-06
ENSMUSG00000026854	Usp20	589.71	582.387	413.012	376.993	-0.511339	6.5995e-06
ENSMUSG00000050195	Scd4	81.6104	47.7498	43.5826	27.4135	-0.890162	6.60798e-06
ENSMUSG00000031661	Nkd1	513.952	367.041	336.513	205.26	-0.61437	6.63988e-06
ENSMUSG00000036570	Fxyd1	246.969	159.73	79.7683	79.9302	-1.6322	6.93129e-06
ENSMUSG00000026213	Stk11ip	534.721	440.357	358.323	305.277	-0.573244	6.95002e-06
ENSMUSG00000027589	Pcmtd2	1069.35	882.252	654.252	552.319	-0.707256	6.97004e-06
ENSMUSG00000022508	Bcl6	814.092	1010.7	531.365	695.965	-0.615591	7.33304e-06
ENSMUSG00000110937	AC156631.1	20.8566	5.39049	6.12498	4.62763	-1.80059	7.76474e-06
ENSMUSG00000044164	Rnf182	405.12	251.581	274.622	180.539	-0.557912	7.81416e-06
ENSMUSG00000037259	Dzank1	249.28	143.353	144.545	73.8466	-0.77548	7.81926e-06
ENSMUSG00000024773	Atg2a	901.378	803.741	609.856	581.376	-0.56272	7.84579e-06
ENSMUSG00000007480	Mc5r	13.1132	6.38192	2.18541	0	-2.21561	8.05566e-06
ENSMUSG00000019027	Dnah1	127.837	101.861	66.204	57.6252	-0.924919	8.06451e-06
ENSMUSG00000032109	Nlrx1	241.977	181.742	157.97	124.625	-0.617844	8.17064e-06
ENSMUSG00000020878	Lrrc46	89.5939	53.9989	50.0327	38.7037	-0.83039	8.18569e-06
ENSMUSG00000003354	Ccdc65	97.0282	64.5637	51.6256	36.9868	-0.887263	8.66098e-06
ENSMUSG00000071226	Cecr2	262.769	347.457	175.043	223.226	-0.580418	8.71303e-06
ENSMUSG00000054256	Msi1	3245.95	2574.46	2184.79	1850.69	-0.569502	8.7207e-06
ENSMUSG00000029168	Dpysl5	702.913	498.932	468.76	360.944	-0.581062	8.85536e-06
ENSMUSG00000027447	Cst3	18787.6	18540.4	12887.2	12370.3	-0.541952	8.86269e-06
ENSMUSG00000114196	AC154597.1	338.658	208.343	216.572	215.279	-0.632556	8.91987e-06
ENSMUSG00000036264	Fstl4	28.0345	23.1773	8.80131	10.1432	-1.59678	8.97191e-06
ENSMUSG00000029337	Fgf5	48.6986	48.2632	21.6276	24.3258	-1.13559	9.00813e-06
ENSMUSG00000043664	Tmem221	20.522	60.3984	5.67777	13.4248	-1.70377	9.35535e-06
ENSMUSG00000035713	Usp35	419.072	385.27	273.382	240.831	-0.613253	9.49976e-06
ENSMUSG00000047230	Cldn2	55.9759	34.4558	26.342	15.8098	-1.04372	9.49976e-06
ENSMUSG00000021900	Btd	518.997	499.461	352.064	341.053	-0.558257	9.76329e-06
ENSMUSG00000038555	Reep2	917.651	827.82	632.985	607.731	-0.534041	9.854e-06
ENSMUSG00000020150	Gamt	330.157	276.835	214.1	181.941	-0.633066	1.00107e-05
ENSMUSG00000029524	Sirt4	303.828	251.12	200.889	176.265	-0.590435	1.00529e-05
ENSMUSG00000028015	Ctso	977.635	903.362	673.521	568.653	-0.534392	1.00735e-05
ENSMUSG00000018166	Erbb3	109.823	116.286	62.9189	60.8734	-0.782308	1.00798e-05
ENSMUSG00000000282	Mnt	475.632	719.657	323.187	498.353	-0.551891	1.02863e-05
ENSMUSG00000044361	BC024139	21.7476	11.7724	6.28171	0.974381	-1.76132	1.04977e-05
ENSMUSG00000034156	Tspoap1	389.686	280.59	253.727	206.099	-0.623748	1.07196e-05
ENSMUSG00000101940	Akp-ps1	15.723	12.7824	3.53382	1.6921	-2.21828	1.13746e-05
ENSMUSG00000021259	Cyp46a1	371.198	390.322	254.283	200.539	-0.547287	1.19705e-05
ENSMUSG00000002871	Tpra1	423.465	405.475	293.972	292.444	-0.521849	1.24628e-05
ENSMUSG00000079057	Cyp4v3	329.782	377.668	219.421	249.97	-0.581757	1.25399e-05
ENSMUSG00000027350	Chgb	210.464	113.027	136.453	131.017	-0.632835	1.29284e-05
ENSMUSG00000040752	Myh6	15.6535	2.30678	2.52416	0.414477	-2.6796	1.29284e-05
ENSMUSG00000070883	Ccdc173	254.023	185.975	160.612	129.053	-0.65906	1.30083e-05
ENSMUSG00000033597	Caskin1	761.799	517.432	514.531	384.638	-0.561684	1.37377e-05
ENSMUSG00000073565	Prr16	37.5805	56.4831	15.6731	22.278	-1.32309	1.38021e-05
ENSMUSG00000039648	Kyat1	179.146	163.047	113.111	107.174	-0.666324	1.3908e-05
ENSMUSG00000017897	Eya2	120.479	84.4083	71.9023	51.031	-0.756259	1.41206e-05
ENSMUSG00000097885	5031434O11Rik	107.724	108.401	52.34	60.4654	-1.03857	1.46057e-05
ENSMUSG00000097113	Gm19705	59.3508	110.199	27.2869	56.7133	-1.0841	1.46093e-05
ENSMUSG00000022847	Thpo	28.7768	22.7763	9.68205	6.27612	-1.46871	1.46097e-05
ENSMUSG00000073609	D2hgdh	449.128	424.666	313.163	350.562	-0.518371	1.59176e-05
ENSMUSG00000053111	Fank1	95.6224	78.4165	55.1895	37.0891	-0.789999	1.64174e-05
ENSMUSG00000044952	Kctd21	338.832	295.16	233.216	216.839	-0.535606	1.64495e-05
ENSMUSG00000044716	Dok7	91.3446	71.9863	50.418	30.2063	-0.813972	1.65106e-05
ENSMUSG00000095139	Pou3f2	2809.31	1992.37	1954.97	1258.99	-0.521423	1.66436e-05
ENSMUSG00000006711	D130043K22Rik	76.4459	55.4452	41.6925	26.7297	-0.847635	1.67866e-05
ENSMUSG00000026202	Tuba4a	185.803	164.15	116.681	121.644	-0.679329	1.71542e-05
ENSMUSG00000108950	9130015G15Rik	14.8469	14.1052	3.41173	3.53259	-2.23655	1.79736e-05
ENSMUSG00000029049	Morn1	189.61	174.908	120.391	96.5952	-0.656929	1.81299e-05
ENSMUSG00000024552	Slc14a2	146.255	83.5804	82.1794	46.0939	-0.827869	1.84633e-05
ENSMUSG00000032718	Mansc1	146.303	138.787	85.1464	96.6389	-0.749696	1.84975e-05
ENSMUSG00000022376	Adcy8	172.369	199.49	110.112	100.47	-0.649114	1.87429e-05
ENSMUSG00000041889	Shisa4	3662.5	3388.73	2362.6	2181.41	-0.630537	1.88331e-05
ENSMUSG00000019256	Ahr	419.101	872.545	291.192	535.079	-0.516136	1.99211e-05
ENSMUSG00000046056	Sbsn	421.577	532.182	282.853	290.232	-0.576297	2.01803e-05
ENSMUSG00000029601	Iqcd	119.075	73.1679	69.6456	31.8204	-0.768315	2.02172e-05
ENSMUSG00000029603	Dtx1	574.519	420.225	323.666	227.089	-0.82976	2.07599e-05
ENSMUSG00000021460	Auh	691.741	673.231	465.817	471.116	-0.565823	2.10318e-05
ENSMUSG00000023236	Scg5	187.91	144.546	115.633	107.474	-0.67508	2.12118e-05
ENSMUSG00000007891	Ctsd	13525.7	13093.6	8312.14	9308.97	-0.700676	2.17936e-05
ENSMUSG00000025486	Sirt3	339.93	290.645	227.731	209.963	-0.574477	2.18684e-05
ENSMUSG00000037031	Tspan15	854.72	527.356	546.684	368.177	-0.644427	2.32099e-05
ENSMUSG00000038422	Hdhd3	100.183	52.6808	56.838	24.9256	-0.795548	2.3864e-05
ENSMUSG00000033159	Cnppd1	660.219	720.041	458.251	414.094	-0.521317	2.43005e-05
ENSMUSG00000035578	Iqcg	767.266	521.682	507.794	342.456	-0.595923	2.43489e-05
ENSMUSG00000023411	Nfatc4	354.019	347.391	238.642	255.941	-0.572392	2.45014e-05
ENSMUSG00000020785	Camkk1	270.863	164.499	166.287	123.99	-0.70374	2.50723e-05
ENSMUSG00000027861	Casq2	35.4308	29.536	10.9336	10.4521	-1.63543	2.57872e-05
ENSMUSG00000059327	Eda	214.866	150.486	143.383	102.93	-0.581817	2.6054e-05
ENSMUSG00000001911	Nfix	18428.3	14104.5	12245.1	10686.1	-0.587954	2.63436e-05
ENSMUSG00000002409	Dyrk1b	620.715	548.815	355.717	241.617	-0.800326	2.6399e-05
ENSMUSG00000113683	CT030159.2	15.7974	0	3.68828	5.45362	-2.12754	2.68744e-05
ENSMUSG00000054728	Phactr1	184.436	226.955	120.84	190.843	-0.610468	2.68836e-05
ENSMUSG00000050505	Pcdh20	75.2991	62.7917	39.3847	52.8148	-0.918826	2.68842e-05
ENSMUSG00000020641	Rsad2	45.0389	3880.34	17.8357	3057.61	-1.23745	2.70654e-05
ENSMUSG00000021359	Tfap2a	243.425	304.873	149.377	180.828	-0.706621	2.74183e-05
ENSMUSG00000042804	Gpr153	547.988	645.866	360.942	428.997	-0.598079	2.75622e-05
ENSMUSG00000050002	Idnk	246.767	298.589	166.345	283.185	-0.565966	2.76158e-05
ENSMUSG00000041986	Elmod1	28.0447	14.9341	10.7562	3.3842	-1.37132	2.81731e-05
ENSMUSG00000030720	Cln3	322.124	289.19	195.855	204.954	-0.713243	2.83282e-05
ENSMUSG00000102748	Pcdhgb2	286.899	275.294	193.017	182.642	-0.577346	2.8986e-05
ENSMUSG00000036864	Proser3	383.902	389.394	269.414	263.404	-0.514457	2.92523e-05
ENSMUSG00000067872	Ccdc87	25.6141	13.7209	9.10089	6.74659	-1.60295	2.95714e-05
ENSMUSG00000066647	Gm5113	290.842	213.09	180.359	163.324	-0.680732	3.00086e-05
ENSMUSG00000037617	Spag1	313.718	206.081	216.369	153.382	-0.532847	3.02668e-05
ENSMUSG00000021363	Mak	169.971	177.048	102.85	84.1381	-0.713899	3.05624e-05
ENSMUSG00000032968	Inha	103.321	108.254	60.0558	88.1353	-0.788452	3.07122e-05
ENSMUSG00000029231	Pdgfra	525.09	388.887	364.156	293.218	-0.526173	3.13164e-05
ENSMUSG00000091415	Ak9	185.209	92.114	116.364	54.9991	-0.652834	3.16113e-05
ENSMUSG00000015476	Prrt1	162.964	160.669	95.6537	106.223	-0.756753	3.16406e-05
ENSMUSG00000021234	Fam161b	298.681	215.492	205.864	110.141	-0.530448	3.22628e-05
ENSMUSG00000074264	Amy1	103.401	85.7191	57.7925	39.3436	-0.802875	3.2265e-05
ENSMUSG00000075289	Carns1	60.7006	45.87	30.6297	46.4774	-0.954363	3.27693e-05
ENSMUSG00000022773	Ypel1	145.473	106.648	85.1647	94.3068	-0.769907	3.34914e-05
ENSMUSG00000037526	Atg14	294.306	241.431	195.359	166.189	-0.588573	3.41985e-05
ENSMUSG00000013622	Atraid	928.384	796.485	638.035	606.589	-0.540119	3.42289e-05
ENSMUSG00000038738	Shank1	43.4148	40.5492	20.1546	13.264	-1.13996	3.43113e-05
ENSMUSG00000036598	Ccdc113	48.2873	30.9814	21.8951	27.6141	-1.0912	3.53438e-05
ENSMUSG00000014846	Tppp3	699.588	544.588	441.86	443.343	-0.663567	3.53679e-05
ENSMUSG00000035513	Ntng2	120.948	154.61	74.5488	97.5392	-0.691211	3.61443e-05
ENSMUSG00000043020	Wdr63	56.8699	37.3242	28.4142	23.893	-1.01262	3.65854e-05
ENSMUSG00000023931	Efhb	143.312	106.692	82.2833	67.8767	-0.772038	3.71728e-05
ENSMUSG00000058145	Adamts17	142.526	107.385	89.5236	58.0645	-0.670237	3.78231e-05
ENSMUSG00000028327	Stra6l	20.5201	18.2054	6.36942	4.43562	-1.54633	3.78888e-05
ENSMUSG00000033053	1700028P14Rik	17.1555	5.91779	4.45374	2.36324	-1.73618	3.82815e-05
ENSMUSG00000028158	Mttp	566.24	512.881	376.953	380.676	-0.581823	3.89908e-05
ENSMUSG00000017692	Rhbdl3	716.09	1004.8	462.688	461.784	-0.62919	3.95618e-05
ENSMUSG00000074923	Pak6	84.227	98.2965	46.6303	61.8297	-0.824758	3.98314e-05
ENSMUSG00000108322	5430431A17Rik	12.5944	17.7951	2.39978	2.54582	-2.04213	3.98314e-05
ENSMUSG00000028755	Cda	39.9855	45.0624	16.411	34.2958	-1.28008	4.00119e-05
ENSMUSG00000046442	Ppm1e	845.769	628.039	564.54	384.278	-0.581959	4.0854e-05
ENSMUSG00000042417	Ccno	52.5308	43.6969	26.4709	18.8878	-1.00061	4.17337e-05
ENSMUSG00000030004	Nat8	12.1519	2.72264	2.3606	0.974381	-2.3137	4.35122e-05
ENSMUSG00000033152	Podxl2	671.635	603.646	468.952	485.684	-0.521825	4.37716e-05
ENSMUSG00000034685	Fam171a2	736.542	635.583	480.62	438.594	-0.615963	4.48818e-05
ENSMUSG00000049551	Fzd9	511.116	301.384	347.405	175.068	-0.557257	4.55037e-05
ENSMUSG00000050335	Lgals3	387.84	578.897	236.89	386.35	-0.714334	4.59566e-05
ENSMUSG00000058831	Opn1sw	20.1996	19.5811	5.8254	4.67717	-1.54965	4.621e-05
ENSMUSG00000031364	Grpr	13.1007	24.1882	2.61188	9.75644	-2.09267	4.65016e-05
ENSMUSG00000026226	Spata3	45.4138	21.8759	17.9348	5.71325	-1.31903	4.86271e-05
ENSMUSG00000023912	Slc25a27	241.059	190.003	158.314	162.545	-0.591905	4.89671e-05
ENSMUSG00000097123	Gm6297	62.2587	41.7725	33.1101	29.9992	-0.881427	4.97287e-05
ENSMUSG00000032182	Yipf2	334.557	258.949	220.217	190.098	-0.597229	4.98897e-05
ENSMUSG00000094140	Olfr1512	19.2284	21.8693	5.62242	12.1908	-1.76359	5.03226e-05
ENSMUSG00000030401	Rtn2	156.949	105.293	100.065	80.8166	-0.654123	5.03478e-05
ENSMUSG00000003545	Fosb	67.6997	150.737	36.0309	100.611	-0.895354	5.0368e-05
ENSMUSG00000035032	Nek11	141.131	98.0467	77.1075	62.6614	-0.85598	5.07958e-05
ENSMUSG00000059839	Zfp874b	129.628	104.081	78.862	73.5835	-0.696176	5.11962e-05
ENSMUSG00000085246	Gm15893	90.007	87.3195	47.4143	41.336	-0.903146	5.12364e-05
ENSMUSG00000031196	F8	76.2726	48.5787	41.2359	26.6053	-0.857247	5.28842e-05
ENSMUSG00000038020	Rapgefl1	104.031	81.8232	58.5046	52.2714	-0.814009	5.29199e-05
ENSMUSG00000110020	Gm45441	18.0778	15.972	4.00655	11.2194	-2.03583	5.32617e-05
ENSMUSG00000048368	Omd	101.679	53.8273	51.6023	28.6004	-0.978049	5.55488e-05
ENSMUSG00000074796	Slc4a11	64.2694	70.5335	32.919	50.6133	-0.899886	5.579e-05
ENSMUSG00000039787	Cercam	793.808	1100.21	551.282	639.244	-0.525996	5.68881e-05
ENSMUSG00000000167	Pih1d2	170.073	146.353	110.448	89.7114	-0.636032	5.68881e-05
ENSMUSG00000021743	Fezf2	89.4833	52.7607	50.867	33.0028	-0.846806	5.71083e-05
ENSMUSG00000038670	Mybpc2	14.0182	41.4375	3.43245	21.6413	-1.97067	5.71921e-05
ENSMUSG00000035158	Mitf	190.124	179.28	120.95	119.107	-0.655151	5.72162e-05
ENSMUSG00000060579	Fhit	26.978	25.8238	10.2536	15.5903	-1.35358	5.73934e-05
ENSMUSG00000048832	Vps37c	516.567	689.529	338.454	465.304	-0.609725	5.77883e-05
ENSMUSG00000021097	Clmn	369.492	303.08	258.361	204.3	-0.512536	5.81579e-05
ENSMUSG00000048731	Ggnbp1	214.082	218.942	141.15	148.36	-0.582654	5.97656e-05
ENSMUSG00000036510	Cdh8	56.7969	43.6282	28.9536	12.5188	-0.982313	5.9827e-05
ENSMUSG00000026344	Lypd1	77.3909	31.3118	43.4029	40.4389	-0.840937	6.09153e-05
ENSMUSG00000047731	Wbp1l	2402.13	2276.15	1672.55	1509.73	-0.520524	6.13605e-05
ENSMUSG00000054893	Zfp667	219.856	158.337	123.546	123.745	-0.816257	6.14421e-05
ENSMUSG00000023904	Hcfc1r1	1373.49	1386.94	923.585	1070.79	-0.571329	6.22533e-05
ENSMUSG00000068154	Insm1	217.788	119.174	133.171	110.157	-0.695367	6.24912e-05
ENSMUSG00000030047	Arhgap25	48.9259	24.0851	22.7043	20.4501	-1.11537	6.25566e-05
ENSMUSG00000020901	Pik3r5	96.5108	671.299	56.2684	594.276	-0.771978	6.26052e-05
ENSMUSG00000029001	Fbxo44	756.229	556.345	525.392	377.371	-0.52535	6.5387e-05
ENSMUSG00000026156	B3gat2	174.981	141.086	111.776	76.6617	-0.623865	6.61698e-05
ENSMUSG00000053964	Lgals4	100.324	70.5112	58.6634	32.7395	-0.760859	6.74848e-05
ENSMUSG00000025020	Slit1	299.946	206.453	190.23	120.326	-0.656907	6.78382e-05
ENSMUSG00000003934	Efnb3	331.123	288.806	197.932	134.801	-0.740104	6.79443e-05
ENSMUSG00000037101	Ttc29	16.2587	6.32064	4.20474	2.38801	-1.79408	6.94117e-05
ENSMUSG00000022756	Slc7a4	133.054	98.9174	77.2671	49.9694	-0.76917	7.0817e-05
ENSMUSG00000086531	Gm11351	10.0875	6.32714	1.80496	5.47839	-2.547	7.13883e-05
ENSMUSG00000042289	Hsd3b7	326.337	268.475	204.304	209.79	-0.674068	7.22869e-05
ENSMUSG00000089661	Mia	16.5927	6.83493	3.527	1.67971	-2.13644	7.42491e-05
ENSMUSG00000029279	Brdt	138.028	143.186	88.3271	74.0997	-0.645438	7.79436e-05
ENSMUSG00000015451	C4a	48.2968	39.0332	14.5322	35.9446	-1.70307	7.90898e-05
ENSMUSG00000087381	Gm16008	263.58	315.442	182.291	166.591	-0.529783	7.93128e-05
ENSMUSG00000063698	Sfxn4	160.125	111.989	100.815	77.3792	-0.648199	8.02213e-05
ENSMUSG00000111110	AC163342.1	19.6537	9.93721	5.65249	3.69041	-1.60108	8.06961e-05
ENSMUSG00000036528	Ppfibp2	123.694	122.447	69.5856	92.0793	-0.807646	8.32902e-05
ENSMUSG00000069874	Irgm2	153.055	1603.47	99.0006	1279.79	-0.610622	8.35838e-05
ENSMUSG00000038332	Sesn1	1103.99	856.227	770.311	606.53	-0.518	8.43078e-05
ENSMUSG00000027954	Efna1	89.1664	124.577	41.6258	31.0511	-1.09932	8.5336e-05
ENSMUSG00000024036	Slc37a1	46.6241	44.951	23.103	32.0904	-1.065	8.59258e-05
ENSMUSG00000018893	Mb	21.6196	24.5316	7.10709	15.383	-1.63561	8.72002e-05
ENSMUSG00000024210	Ip6k3	25.4114	43.6914	9.40297	9.49012	-1.45156	8.87554e-05
ENSMUSG00000029348	Asphd2	305.502	224.796	208.375	162.567	-0.547368	9.54423e-05
ENSMUSG00000010307	Tmem86a	218.521	139.639	128.9	86.4863	-0.763318	9.68857e-05
ENSMUSG00000100241	Slc18a3	11.8048	4.99878	2.42052	0	-2.27824	0.000100222
ENSMUSG00000024526	Cidea	14.1074	7.31763	2.45742	3.08096	-2.33356	0.000100554
ENSMUSG00000056258	Kcnq3	139.479	1263.5	87.7576	498.045	-0.68483	0.000101779
ENSMUSG00000020937	Plcd3	403.805	451.977	282.239	336.179	-0.515425	0.000102095
ENSMUSG00000005951	Shpk	142.208	151.421	92.5364	90.0902	-0.623463	0.000104217
ENSMUSG00000022323	Rida	511.913	401.445	357.886	367.584	-0.518284	0.000105211
ENSMUSG00000020734	Grin2c	32.9983	13.6021	14.1611	7.32185	-1.19588	0.000105883
ENSMUSG00000087314	Prkag2os2	74.0776	66.1612	39.7101	17.3166	-0.882869	0.000107932
ENSMUSG00000069806	Cacng7	3327.04	3668.71	2221.37	2438.62	-0.580961	0.000109065
ENSMUSG00000045467	Ttll13	30.2972	18.6269	12.462	10.2173	-1.23706	0.000109178
ENSMUSG00000029596	Sdsl	27.2015	25.4859	10.6639	21.118	-1.33274	0.000111971
ENSMUSG00000041954	Tnfrsf18	275.565	329.548	190.135	181.931	-0.531366	0.000114193
ENSMUSG00000044134	Fam109a	265.401	229.115	168.1	168.451	-0.654723	0.000117314
ENSMUSG00000048520	Fbxl13	16.0435	7.79571	4.69112	4.46982	-1.68941	0.000119856
ENSMUSG00000040265	Dnm3	202.829	262.573	117.834	151.721	-0.768774	0.000122931
ENSMUSG00000041272	Tox	22.8156	16.3814	8.03837	8.96144	-1.40009	0.000129136
ENSMUSG00000023043	Krt18	17.0585	8.206	5.21896	1.24343	-1.76854	0.000130293
ENSMUSG00000020889	Nr1d1	755.001	828.856	526.004	517.485	-0.519648	0.00013299
ENSMUSG00000037363	Letm2	310.671	275.232	208.928	162.616	-0.561499	0.000134906
ENSMUSG00000071669	Snx29	155.071	102.725	102.709	78.6853	-0.597869	0.000135876
ENSMUSG00000028645	Slc2a1	3867.56	6832.21	2660.36	4381.56	-0.537876	0.000137243
ENSMUSG00000045625	Pigz	30.4132	11.3008	12.7179	5.26458	-1.23492	0.000138388
ENSMUSG00000036578	Fxyd7	11.5113	4.55785	2.40434	0.57229	-2.24665	0.00013996
ENSMUSG00000105703	Gm43305	117.505	162.024	73.8758	161.975	-0.650721	0.000140865
ENSMUSG00000051043	Gprc5c	73.3565	71.8201	34.4428	37.2997	-1.05558	0.000142963
ENSMUSG00000026875	Traf1	177.297	194.402	108.482	123.127	-0.701799	0.000147011
ENSMUSG00000033491	Prss35	574.223	485.91	375.847	307.77	-0.604289	0.000147788
ENSMUSG00000078201	Tmem203	132.471	113.257	68.4885	89.0269	-0.925357	0.000151053
ENSMUSG00000024426	Atat1	1085.04	1042.71	745.262	769.221	-0.539935	0.000153169
ENSMUSG00000026611	Spata17	85.1104	54.5151	47.6215	32.2566	-0.805006	0.000154806
ENSMUSG00000032380	Dapk2	15.4527	155.849	4.51594	88.6359	-1.83438	0.000155022
ENSMUSG00000033966	Cdkl4	79.062	50.7675	44.2743	25.1488	-0.802449	0.000156494
ENSMUSG00000109321	A330076H08Rik	93.4609	74.603	56.5126	35.3777	-0.717692	0.000156674
ENSMUSG00000005320	Fgfr4	27.1397	16.399	10.7931	6.18669	-1.39699	0.000168662
ENSMUSG00000027887	Sypl2	20.6812	18.5591	7.40209	12.0919	-1.45709	0.000168918
ENSMUSG00000022175	Lrp10	1829.54	1718.6	1270.82	1216.72	-0.524594	0.000169396
ENSMUSG00000103144	Pcdhga1	154.729	136.813	95.7704	75.7336	-0.693288	0.000170604
ENSMUSG00000045287	Rtn4rl1	211.06	145.677	140.623	68.777	-0.580249	0.000173219
ENSMUSG00000038777	Sema6c	137.836	96.282	85.1412	55.7047	-0.716538	0.000174129
ENSMUSG00000079177	Fam228a	104.273	66.3608	65.4454	34.4841	-0.677993	0.00018127
ENSMUSG00000034586	Hid1	310.995	215.785	211.699	154.24	-0.553886	0.000182406
ENSMUSG00000021879	Dnah12	31.3619	12.7527	13.9075	4.25031	-1.11702	0.000182815
ENSMUSG00000002908	Kcnn1	99.1238	156.129	60.5492	83.6067	-0.701346	0.000185997
ENSMUSG00000073888	Ccl27a	96.7768	84.712	58.4121	61.9288	-0.736347	0.000186765
ENSMUSG00000097876	Gm16892	35.5427	30.0317	15.7264	21.1401	-1.08245	0.000189528
ENSMUSG00000109704	Gm38414	26.5899	10.005	10.0279	16.1475	-1.24778	0.00019063
ENSMUSG00000066258	Trim12a	152.004	948.768	100.469	671.166	-0.588337	0.000191256
ENSMUSG00000101872	Gm29237	99.7667	99.1319	59.6364	67.3264	-0.713197	0.000192149
ENSMUSG00000087036	Gm11748	17.0311	2.72914	4.57585	0.559904	-1.95603	0.000193074
ENSMUSG00000032641	Gpr19	273.251	237.197	186.205	152.918	-0.541769	0.000198984
ENSMUSG00000022621	Rabl2	574.123	439.875	364.499	295.148	-0.654876	0.000199373
ENSMUSG00000100039	Gm28959	73.3619	55.9047	40.701	31.9888	-0.855733	0.000199965
ENSMUSG00000041323	Ak7	67.0199	40.0869	34.6638	16.7443	-0.944679	0.000204116
ENSMUSG00000092192	Dyx1c1	86.9929	85.1623	51.3788	61.554	-0.751944	0.000204783
ENSMUSG00000022203	Efs	868.887	890.976	567.303	602.306	-0.61214	0.000207151
ENSMUSG00000086043	Gm12473	85.0439	80.1319	46.0866	53.1903	-0.841584	0.000207435
ENSMUSG00000037989	Wnk2	667.364	508.213	397.897	320.948	-0.746087	0.000207795
ENSMUSG00000042647	Acad12	179.984	127.841	116.094	79.684	-0.616754	0.000210799
ENSMUSG00000028950	Tas1r1	29.5719	16.3609	12.6673	9.07564	-1.14901	0.000212728
ENSMUSG00000041625	Ggact	234.741	180.383	152.79	146.019	-0.616751	0.000223048
ENSMUSG00000075569	Rsph10b	130.047	94.5963	84.5329	49.5334	-0.610371	0.000226924
ENSMUSG00000022449	Adamts20	223.131	382.91	152.726	219.959	-0.542882	0.000227483
ENSMUSG00000030946	Lhpp	246.877	253.599	165.2	190.227	-0.565297	0.000230796
ENSMUSG00000040231	Syngr4	14.0327	10.005	3.776	1.94876	-1.72302	0.000233587
ENSMUSG00000061099	Gapdhs	32.1593	37.0087	14.1034	24.8181	-1.15245	0.000235022
ENSMUSG00000052605	Isoc2b	77.8241	63.5899	41.5772	38.2523	-0.908089	0.000235823
ENSMUSG00000010154	Spire2	45.7475	26.8403	23.2412	16.1066	-0.975955	0.000244401
ENSMUSG00000009731	Kcnd1	178.762	186.262	119.962	111.063	-0.566107	0.000244929
ENSMUSG00000066607	6030419C18Rik	525.325	520.543	359.773	457.065	-0.544531	0.00024576
ENSMUSG00000078552	Dcdc2b	57.5195	54.9671	28.9261	25.4179	-0.93432	0.000250892
ENSMUSG00000024663	Rab3il1	143.319	66.4639	92.0637	47.4734	-0.654199	0.000254515
ENSMUSG00000030340	Scnn1a	53.2277	42.7723	25.6827	21.3844	-0.980569	0.000259589
ENSMUSG00000015094	Npdc1	1419.26	1488.11	933.886	1125.62	-0.602039	0.000267146
ENSMUSG00000024873	Cnih2	130.785	111.626	84.088	87.0184	-0.636281	0.00027175
ENSMUSG00000031970	Dbndd1	142.068	111.277	74.5048	58.6925	-0.921004	0.000272165
ENSMUSG00000056602	Fry	222.656	150.173	150.026	94.6036	-0.5851	0.000274465
ENSMUSG00000097756	A730056A06Rik	65.5112	40.0005	36.5054	24.5052	-0.876824	0.000274494
ENSMUSG00000047976	Kcna1	43.6919	31.7304	22.1626	7.96822	-0.959068	0.000280987
ENSMUSG00000079014	Serpina3i	14.3962	74.9827	4.14255	45.9269	-1.67255	0.000287742
ENSMUSG00000037379	Spon2	119.794	105.204	77.6147	59.5064	-0.627474	0.000292109
ENSMUSG00000040181	Fmo1	131.975	82.2539	86.4853	47.1236	-0.603346	0.000292943
ENSMUSG00000022494	Shisa9	153.866	96.9125	100.199	89.0145	-0.596134	0.000292943
ENSMUSG00000011154	Cfap161	31.7771	24.0972	14.3016	10.3904	-1.10741	0.000293869
ENSMUSG00000061353	Cxcl12	183.279	308.288	123.484	161.734	-0.561749	0.000294534
ENSMUSG00000032649	Colgalt2	361.492	280.389	242.511	199.046	-0.577367	0.000296901
ENSMUSG00000020297	Nsg2	910	532.474	607.133	340.564	-0.579713	0.000298733
ENSMUSG00000023826	Park2	59.1359	58.2356	30.8994	19.1601	-0.94754	0.000299128
ENSMUSG00000021090	Lrrc9	409.816	427.23	274.412	231.764	-0.569037	0.000303926
ENSMUSG00000101678	Gm29609	96.7733	82.4666	54.6366	25.9713	-0.802833	0.000305617
ENSMUSG00000064307	Lrrc51	189.6	203.999	124.524	141.143	-0.603476	0.000310689
ENSMUSG00000041115	Iqsec2	955.67	795.17	657.878	615.856	-0.536356	0.000321429
ENSMUSG00000001700	Gramd3	574.743	406.836	389.956	363.765	-0.557156	0.000329401
ENSMUSG00000047419	Cmya5	149.511	113.438	91.262	51.4261	-0.680814	0.000331067
ENSMUSG00000041120	Nbl1	1014.6	911.086	686.866	776.129	-0.56111	0.000334276
ENSMUSG00000017721	Pigt	5981.51	6365.08	4135.42	4345.63	-0.530743	0.00034114
ENSMUSG00000020432	Tcn2	902.538	815.116	626.111	648.851	-0.525712	0.000355233
ENSMUSG00000048424	Ranbp3l	18.5113	10.4645	6.57217	3.49543	-1.48267	0.00036065
ENSMUSG00000097820	E530011L22Rik	160.027	124.841	102.325	76.2507	-0.631714	0.000360842
ENSMUSG00000044562	Rasip1	45.5593	38.1012	22.9417	43.0873	-1.01825	0.000372878
ENSMUSG00000005803	Sqor	199.308	193.635	134.441	128.308	-0.585433	0.000378287
ENSMUSG00000036422	Pcdh8	45.2995	72.6313	20.7264	56.0823	-1.1422	0.000383434
ENSMUSG00000002578	Ikzf4	209.767	191.778	146.804	127.062	-0.508941	0.000391888
ENSMUSG00000071573	Rnls	48.8766	36.4164	25.9593	21.5109	-0.860159	0.000407411
ENSMUSG00000096883	Shisa8	116.042	190.336	58.258	112.681	-1.00261	0.000408848
ENSMUSG00000107859	Gm30731	38.1776	34.0892	18.7531	14.6776	-0.966517	0.000409968
ENSMUSG00000034035	Ccdc17	57.9187	39.1196	31.9667	17.4403	-0.846047	0.000419716
ENSMUSG00000031893	Tsnaxip1	48.902	33.7718	20.9109	18.3309	-1.13644	0.000424031
ENSMUSG00000039770	Ypel5	734.012	727.071	512.188	569.12	-0.516895	0.00043084
ENSMUSG00000061298	Agbl4	19.1909	13.7005	6.84645	7.24753	-1.47899	0.000441677
ENSMUSG00000087178	A230056P14Rik	150.906	128.678	95.264	67.7902	-0.631465	0.000444861
ENSMUSG00000027580	Helz2	211.361	2115.05	146.668	1884.31	-0.528259	0.000445667
ENSMUSG00000073147	5031425E22Rik	185.789	149.592	123.634	94.7141	-0.568522	0.000446152
ENSMUSG00000097320	Tmem147os	173.281	209.997	117.479	152.617	-0.567687	0.000446228
ENSMUSG00000010609	Psen2	226.551	202.174	147.604	156.39	-0.610483	0.000462025
ENSMUSG00000019892	Lrriq1	189.623	133.001	128.122	77.401	-0.56	0.0004641
ENSMUSG00000003070	Efna2	121.314	74.9195	78.7998	81.2442	-0.614213	0.000464242
ENSMUSG00000063887	Nlgn1	628.268	619.518	436.289	447.317	-0.522864	0.000482627
ENSMUSG00000064280	Ccdc146	88.7362	56.4274	54.8116	34.1534	-0.689741	0.000485939
ENSMUSG00000031637	Lrp2bp	62.8084	35.1884	34.3986	23.9919	-0.838695	0.000492179
ENSMUSG00000074272	Ceacam1	36.6315	16.838	15.353	10.3285	-1.14426	0.00049605
ENSMUSG00000069670	Nkain2	203.097	239.647	135.483	169.767	-0.57493	0.000496291
ENSMUSG00000033208	S100b	61.8908	55.9214	35.4935	12.2896	-0.841522	0.000499798
ENSMUSG00000037872	Ackr1	18.2197	18.0986	6.43616	8.4045	-1.4647	0.000509433
ENSMUSG00000022112	Gpc5	11.4597	5.90572	2.80552	3.81106	-1.98897	0.000514554
ENSMUSG00000030643	Rab30	884.708	1337.84	612.871	843.579	-0.527794	0.000516744
ENSMUSG00000029660	Tex26	23.4113	20.0527	8.68148	10.2173	-1.33331	0.000534529
ENSMUSG00000042918	Mamstr	56.7337	72.674	22.1535	17.0258	-1.35601	0.000542655
ENSMUSG00000038259	Gdf5	15.345	33.1265	4.55057	14.9876	-1.75967	0.000554083
ENSMUSG00000078695	Cisd3	198.91	186.642	134.557	163.189	-0.547796	0.000560504
ENSMUSG00000040563	Plppr2	952.589	975.419	650.59	626.575	-0.548749	0.000574659
ENSMUSG00000046961	Gpr156	70.9204	44.0301	37.9787	30.5036	-0.924481	0.000579697
ENSMUSG00000031831	Dnaaf1	28.1957	14.9982	11.964	6.80852	-1.23853	0.000585043
ENSMUSG00000023328	Ache	105.124	130.161	63.3408	79.5913	-0.708933	0.000586128
ENSMUSG00000084974	Gm15567	113.179	121.967	72.1652	54.9562	-0.635799	0.000590873
ENSMUSG00000035745	Grin3b	25.8173	11.4058	10.4174	3.19219	-1.21344	0.000608852
ENSMUSG00000109284	B230311B06Rik	60.4604	36.7886	30.6967	35.9109	-0.966634	0.000618779
ENSMUSG00000070737	Tmem35b	133.266	114.527	82.5296	89.9542	-0.699883	0.000620561
ENSMUSG00000045034	Ankrd34b	126.037	81.6005	81.8354	24.7866	-0.645942	0.000658867
ENSMUSG00000073633	Fbxo36	226.421	206.373	132.685	148.928	-0.774805	0.000673665
ENSMUSG00000045102	Poln	124.654	97.4165	81.7458	62.4287	-0.587232	0.00067814
ENSMUSG00000041762	Gpr155	198.567	125.656	136.136	65.5469	-0.526243	0.000681316
ENSMUSG00000050022	Amz1	113.158	82.6809	73.0528	53.0013	-0.633582	0.000686059
ENSMUSG00000069633	Pex11g	129.374	113.692	84.6621	85.4135	-0.59722	0.000738575
ENSMUSG00000041193	Pla2g5	33.4365	26.7966	16.1827	20.1962	-1.02518	0.000747476
ENSMUSG00000046637	Ttc34	22.6486	10.8859	9.14941	4.79783	-1.27516	0.000753973
ENSMUSG00000025188	Hps1	719.539	740.792	500.895	543.833	-0.520933	0.000781031
ENSMUSG00000060780	Lrrtm1	23.5661	18.5721	9.81805	8.01479	-1.1672	0.000781063
ENSMUSG00000103037	Pcdhgb1	218.058	198.176	146.184	129.122	-0.582593	0.000783029
ENSMUSG00000033192	Lpcat2	156.924	155.456	105.596	103.676	-0.567023	0.000784339
ENSMUSG00000021198	Unc79	152.834	160.231	93.9293	116.51	-0.676112	0.000789704
ENSMUSG00000070306	Ccdc153	21.5761	14.0811	8.93277	2.80249	-1.26635	0.0007963
ENSMUSG00000018427	Ypel2	132.028	192.442	86.4924	99.2085	-0.608985	0.000827423
ENSMUSG00000044986	Tst	1591.3	1054.91	1115.69	876.739	-0.51149	0.000835461
ENSMUSG00000107741	Gm2011	115.376	99.8041	76.6788	60.7899	-0.582512	0.000849692
ENSMUSG00000044022	Pcdhb21	71.9455	38.194	41.3699	39.8513	-0.761134	0.000851783
ENSMUSG00000067780	Pi15	138.494	60.8886	71.9758	33.6428	-0.94011	0.000881915
ENSMUSG00000033805	Ephx4	52.6544	48.6474	29.5298	28.6252	-0.883438	0.000885742
ENSMUSG00000022564	Grina	2219.24	2690.91	1525.82	1862.4	-0.538758	0.000890819
ENSMUSG00000039652	Cpeb3	107.696	95.6853	67.919	73.3243	-0.642903	0.000917304
ENSMUSG00000071181	3830408C21Rik	93.1749	77.3953	50.8558	56.6667	-0.837651	0.00092716
ENSMUSG00000087698	Gm13031	11.6623	5.45734	2.98526	5.64859	-2.01527	0.000934573
ENSMUSG00000027347	Rasgrp1	86.9943	135.114	50.1644	57.183	-0.740836	0.000943674
ENSMUSG00000090625	Gm20721	753.798	947.23	353.717	629.044	-1.08504	0.000945904
ENSMUSG00000045008	9030612E09Rik	17.6719	13.6336	6.53071	5.02972	-1.37348	0.00095778
ENSMUSG00000045813	Gm9801	102.335	81.0045	66.9093	63.9576	-0.601377	0.000973515
ENSMUSG00000053024	Cntn2	30.3821	14.1405	10.3552	9.04145	-1.42236	0.000991079
ENSMUSG00000021319	Sfrp4	132.244	148.491	89.8163	111.313	-0.548501	0.0010168
ENSMUSG00000055368	Slc6a2	13.4786	13.6132	4.03183	4.91848	-1.65971	0.00109656
ENSMUSG00000104117	Gm20743	51.8526	15.8912	26.4272	5.33296	-0.916739	0.0011232
ENSMUSG00000040972	Igsf21	59.6769	75.3289	30.8625	32.8138	-0.968816	0.0011232
ENSMUSG00000042050	Wdr60	550.151	430.824	364.836	278.579	-0.59027	0.00113599
ENSMUSG00000096847	Tmem151b	157.629	156.956	109.621	125.57	-0.525703	0.00114301
ENSMUSG00000036356	Csgalnact1	307.988	199.868	200.326	176.505	-0.615957	0.00114312
ENSMUSG00000085586	Gm11613	56.6744	44.5704	33.0155	33.7855	-0.754015	0.00115554
ENSMUSG00000029155	Spata18	23.736	16.3628	9.71668	16.7813	-1.165	0.00116593
ENSMUSG00000086680	Gm11592	15.7747	11.7929	5.3413	5.6144	-1.42316	0.00117163
ENSMUSG00000032425	Zfp949	253.658	214.77	177.323	130.503	-0.510161	0.00118295
ENSMUSG00000048997	Atxn7l2	521.067	670.749	363.51	459.61	-0.517326	0.00119608
ENSMUSG00000016349	Eef1a2	26.003	26.8821	11.6668	12.3887	-1.21518	0.00120083
ENSMUSG00000085311	Gm15445	70.9445	77.7471	42.0499	40.186	-0.727938	0.00122462
ENSMUSG00000111758	AC126459.5	33.143	21.8192	15.2908	13.7375	-0.991057	0.00123729
ENSMUSG00000060402	Chst8	80.3556	46.3667	39.3898	29.8535	-1.01492	0.00124221
ENSMUSG00000022783	Spag6l	90.3417	45.9666	54.3687	24.2394	-0.761803	0.00124518
ENSMUSG00000056856	Jakmip3	51.0572	79.7727	29.3778	43.7859	-0.781157	0.00124576
ENSMUSG00000010086	Rnf112	30.3774	12.7527	13.8476	3.76448	-1.0734	0.00124979
ENSMUSG00000112054	CT030030.1	19.8878	5.00528	7.84928	1.24343	-1.28017	0.00126373
ENSMUSG00000014776	Nol3	150.378	130.038	97.3082	49.9171	-0.64392	0.00126452
ENSMUSG00000027358	Bmp2	35.2344	47.3934	17.4183	46.2825	-0.956337	0.00127421
ENSMUSG00000028150	Rorc	75.4228	81.0165	43.9426	43.1668	-0.745338	0.00129261
ENSMUSG00000033685	Ucp2	448.962	364.562	292.781	288.045	-0.61466	0.00132537
ENSMUSG00000026630	Batf3	41.3255	106.916	20.844	64.1588	-0.919601	0.00133194
ENSMUSG00000039278	Pcsk1n	703.187	730.644	396.939	384.789	-0.823814	0.00133346
ENSMUSG00000037143	Cfap61	62.1115	45.857	36.4503	20.4994	-0.793978	0.00137279
ENSMUSG00000012428	Steap4	67.188	2723.4	39.5832	1399.44	-0.731959	0.00142553
ENSMUSG00000004328	Hif3a	139.362	121.806	71.2668	63.6085	-0.959145	0.00143846
ENSMUSG00000049686	Orai1	468.327	463.086	323.667	336.791	-0.529812	0.00145012
ENSMUSG00000049382	Krt8	12.4453	6.81635	3.62837	4.60286	-1.78413	0.00145592
ENSMUSG00000070287	Slc35g2	101.959	79.601	64.7378	46.4802	-0.628648	0.00145874
ENSMUSG00000090336	4932443I19Rik	91.3526	64.5953	58.29	30.098	-0.643049	0.00155373
ENSMUSG00000037625	Cldn11	60.5222	33.2705	29.2787	15.0552	-1.00464	0.0015632
ENSMUSG00000029627	Zkscan14	89.6557	80.9488	57.9005	71.6199	-0.630042	0.00156622
ENSMUSG00000062646	Ganc	517.553	375.334	323.591	294.886	-0.674052	0.00156901
ENSMUSG00000004633	Chn2	96.6005	61.7417	61.7364	32.3557	-0.655994	0.00160334
ENSMUSG00000039099	Wdr93	50.8069	46.4688	28.0292	24.2825	-0.870326	0.00164453
ENSMUSG00000033594	Spata2l	77.9466	60.5173	47.3172	34.1227	-0.731116	0.00166564
ENSMUSG00000046862	Pramef8	264.273	206.506	183.971	230.078	-0.514078	0.00168687
ENSMUSG00000035211	Xrra1	56.0295	48.5434	33.0363	23.6366	-0.759081	0.00171401
ENSMUSG00000032507	Fbxl2	156.928	114.502	107.836	96.3227	-0.538119	0.00172193
ENSMUSG00000029228	Lnx1	115.633	85.3321	71.8934	71.2886	-0.674147	0.00174724
ENSMUSG00000039543	Cfap70	68.3047	31.3173	32.1856	23.1535	-1.06046	0.00175745
ENSMUSG00000109398	Gm3854	54.6526	44.4348	30.2722	37.3703	-0.823532	0.00176523
ENSMUSG00000051107	Gm15440	51.2509	45.4848	29.44	30.0331	-0.813572	0.00176542
ENSMUSG00000039110	Mycbpap	34.473	21.8852	14.1057	18.2045	-1.25488	0.00177812
ENSMUSG00000061723	Tnnt3	36.3656	34.454	18.6216	16.4069	-0.943544	0.00182467
ENSMUSG00000035944	Ttc38	166.696	129.073	112.364	103.169	-0.555035	0.00183899
ENSMUSG00000002108	Nr1h3	50.9853	49.9934	29.1518	43.1859	-0.816275	0.00186331
ENSMUSG00000032323	Cyp11a1	14.8305	8.16791	5.11531	5.23708	-1.56721	0.00188054
ENSMUSG00000112117	RMST_1	77.7542	34.6035	47.37	34.7876	-0.737703	0.00188155
ENSMUSG00000068874	Selenbp1	365.52	501.189	249.873	278.016	-0.54961	0.00188267
ENSMUSG00000085433	Gm16001	106.339	81.8882	68.3872	45.0019	-0.633471	0.00188471
ENSMUSG00000086181	C230034O21Rik	64.9167	71.9008	35.8651	49.2891	-0.820303	0.00189575
ENSMUSG00000092090	Gm3294	15.3923	17.2613	5.38277	5.60201	-1.44534	0.00191019
ENSMUSG00000091476	Gm16432	51.605	43.6031	26.0422	31.1653	-0.936467	0.0019129
ENSMUSG00000086468	Etaa1os	22.2292	8.6525	9.96545	6.05365	-1.21802	0.00193153
ENSMUSG00000074577	Ripor3	89.6529	139.373	48.5943	50.3316	-0.895114	0.00200585
ENSMUSG00000015083	C8g	45.969	43.7582	25.2077	28.57	-0.816749	0.00201301
ENSMUSG00000007837	Prrg2	205.795	205.71	143.745	169.512	-0.513373	0.00202551
ENSMUSG00000047992	Fam69c	69.5434	40.4349	42.8425	33.7979	-0.712502	0.00202868
ENSMUSG00000106237	Gm8066	31.374	34.4679	15.8278	30.0522	-0.989537	0.00207986
ENSMUSG00000073424	Cyp4f15	26.8377	20.0648	11.7729	7.4207	-1.15411	0.00213684
ENSMUSG00000002083	Bbc3	417.786	789.31	288.927	526.969	-0.529625	0.00218949
ENSMUSG00000037541	Shank2	151.82	109.524	106.223	84.2808	-0.516497	0.00223337
ENSMUSG00000001247	Lsr	22.5492	20.3525	9.88479	15.8098	-1.15414	0.0022734
ENSMUSG00000043621	Ubxn10	40.9137	20.8779	22.7202	13.0663	-0.899746	0.002289
ENSMUSG00000034981	Parm1	221.473	258.103	150.428	207.185	-0.537638	0.00230574
ENSMUSG00000027525	Phactr3	18.8482	12.7146	7.71784	4.75125	-1.30961	0.00234276
ENSMUSG00000074215	Gm10643	94.3909	45.9564	61.9161	25.8504	-0.608256	0.0023898
ENSMUSG00000007279	Scube2	25.5498	18.1915	10.9844	11.0093	-1.12367	0.0023969
ENSMUSG00000107388	Gm42788	27.4993	34.6648	13.4072	18.3187	-1.03231	0.00240371
ENSMUSG00000039632	Ccdc151	255.099	185.724	178.242	139.994	-0.527954	0.00242305
ENSMUSG00000097410	Gm26668	61.2471	48.614	32.6561	35.3292	-0.899667	0.00246913
ENSMUSG00000043795	Prr33	65.3506	94.95	38.6288	62.1265	-0.710597	0.00247404
ENSMUSG00000038094	Atp13a4	119.928	82.667	60.7588	49.6882	-0.967564	0.00251402
ENSMUSG00000090546	Cdr1	82.3675	51.8277	53.6472	24.4096	-0.628923	0.00256466
ENSMUSG00000027661	Slc2a10	150.36	116.897	105.13	94.2726	-0.524525	0.00257538
ENSMUSG00000003752	Itpkc	224.907	306.011	157.808	210.849	-0.524541	0.00263621
ENSMUSG00000076434	Wfdc3	36.745	30.3798	16.3533	12.5	-1.10146	0.00265268
ENSMUSG00000019990	Pde7b	89.9766	55.8926	59.4011	40.5472	-0.599913	0.00277653
ENSMUSG00000053175	Bcl3	686.848	1628.11	455.619	1007.45	-0.590372	0.00279243
ENSMUSG00000097062	Gm17586	72.7838	63.6521	45.533	46.9316	-0.66364	0.00287084
ENSMUSG00000109061	Map2k7_2	131.204	141.446	72.9561	117.016	-0.820352	0.00289069
ENSMUSG00000090173	Fbxw10	36.0752	25.0013	16.6253	12.3516	-1.05603	0.00289643
ENSMUSG00000028524	Sgip1	423.293	447.892	289.119	274.306	-0.543318	0.00295927
ENSMUSG00000031775	Pllp	124.59	82.9233	78.5463	51.6154	-0.668086	0.00300249
ENSMUSG00000039908	Slc26a11	146.879	122.677	98.0187	88.6736	-0.554243	0.00302181
ENSMUSG00000038352	Arl5c	49.3087	60.2647	28.5525	34.716	-0.79674	0.00310868
ENSMUSG00000029162	Khk	115.63	93.5854	79.6343	73.5844	-0.523366	0.00311769
ENSMUSG00000073591	Pcdhb22	191.897	163.195	133.189	132.926	-0.512513	0.00318259
ENSMUSG00000093739	Gm20692	23.6159	11.338	10.7494	16.3546	-1.06949	0.00323745
ENSMUSG00000041144	Dnah7b	644.602	520.345	446.269	360.565	-0.525897	0.00323851
ENSMUSG00000018169	Mfng	48.0854	21.8759	27.8449	21.5546	-0.778049	0.00335571
ENSMUSG00000017943	Gdap1l1	87.2054	57.6953	57.1512	53.3105	-0.62087	0.00335809
ENSMUSG00000025776	Crispld1	40.6164	37.2286	20.2537	30.1627	-0.96247	0.00336626
ENSMUSG00000023391	Dlx2	237.996	212.053	163.035	201.34	-0.544771	0.00338401
ENSMUSG00000021983	Atp8a2	27.3795	33.6232	13.1974	13.0941	-1.01899	0.00339698
ENSMUSG00000085971	Gm15411	14.0371	5.95956	4.7073	6.86725	-1.49923	0.0033974
ENSMUSG00000056687	Gm11696	48.2274	48.1508	27.0197	29.5475	-0.786485	0.00340768
ENSMUSG00000027602	Map1lc3a	672.039	722.655	460.078	585.514	-0.546968	0.00343283
ENSMUSG00000078302	Foxd1	69.3224	74.4787	43.8018	44.9345	-0.647222	0.00348556
ENSMUSG00000040811	Eml2	373.219	357.442	260.665	220.729	-0.511999	0.00350428
ENSMUSG00000087623	Gm12404	37.7191	34.6044	19.1887	25.0683	-0.947278	0.00353181
ENSMUSG00000009633	G0s2	154.839	133.206	92.9887	75.8887	-0.737121	0.00361648
ENSMUSG00000024743	Syt7	80.7859	281.735	49.0415	172.93	-0.737111	0.00361931
ENSMUSG00000026894	Morn5	44.1172	42.8411	25.1544	17.771	-0.893155	0.00372805
ENSMUSG00000025735	Rhbdl1	68.7483	31.1383	42.4094	40.2687	-0.682383	0.00382548
ENSMUSG00000062785	Kcnc3	394.918	531.038	268.256	331.811	-0.551497	0.00387987
ENSMUSG00000056413	Adap1	49.699	44.1536	29.8665	26.3427	-0.757957	0.00404309
ENSMUSG00000034151	Zbbx	43.495	27.7324	24.7143	5.26458	-0.808524	0.00406129
ENSMUSG00000042320	Prox2	106.079	74.2188	70.3787	54.6989	-0.578976	0.00413351
ENSMUSG00000032754	Slc8b1	152.625	132.76	102.687	95.6828	-0.569227	0.00428741
ENSMUSG00000025227	Mfsd13a	270.746	544.226	183.264	304.8	-0.559555	0.00438329
ENSMUSG00000010136	Pifo	39.5795	30.7956	20.3505	12.7878	-0.995245	0.00441404
ENSMUSG00000021786	Oxsm	266.606	214.933	181.488	165.214	-0.546635	0.00445785
ENSMUSG00000108207	1810059H22Rik	47.2	35.1986	26.1759	22.105	-0.830017	0.00467964
ENSMUSG00000029864	Gstk1	122.498	95.4169	76.9046	102.223	-0.660495	0.00468224
ENSMUSG00000024164	C3	101.936	8502.53	69.7975	4021.13	-0.562374	0.004731
ENSMUSG00000045282	Tmem86b	110.725	111.897	71.9189	74.3512	-0.590388	0.00478197
ENSMUSG00000046761	Fam83h	80.6627	59.7997	51.9254	69.5482	-0.637582	0.00478357
ENSMUSG00000021596	Mctp1	59.925	77.295	30.1152	51.5934	-0.998294	0.00478385
ENSMUSG00000032556	Bfsp2	40.325	31.4288	22.1209	19.2064	-0.912473	0.00484037
ENSMUSG00000018774	Cd68	139.433	96.5514	93.1246	87.7052	-0.552769	0.00486872
ENSMUSG00000041132	N4bp2l1	94.7215	100.68	63.9056	51.8966	-0.570306	0.00499382
ENSMUSG00000092187	Gm20457	64.4951	30.5822	39.5	25.8078	-0.729264	0.00556475
ENSMUSG00000032589	Bsn	61.7046	66.2986	38.7717	25.647	-0.684171	0.00572576
ENSMUSG00000102758	Naaladl2	123.642	126.914	69.3664	84.4253	-0.821569	0.00577309
ENSMUSG00000062116	Zfp954	160.169	144.322	110.927	112	-0.528659	0.005775
ENSMUSG00000018740	Slc25a35	179.543	94.1712	121.901	82.311	-0.555449	0.00590081
ENSMUSG00000043913	Ccdc60	62.0489	53.1719	37.1071	30.5834	-0.758621	0.00590414
ENSMUSG00000036923	Stox1	61.2374	34.8819	35.8069	32.3344	-0.769083	0.00609281
ENSMUSG00000066800	Rnasel	237.236	350.794	130.925	190.876	-0.856558	0.00630343
ENSMUSG00000040867	Begain	108.599	177.678	74.3069	161.329	-0.550136	0.0064326
ENSMUSG00000085615	A330035P11Rik	81.0536	48.6214	52.3402	32.1179	-0.631995	0.00644238
ENSMUSG00000087165	2010001A14Rik	101.191	80.6964	67.1007	45.8462	-0.567817	0.00654307
ENSMUSG00000097167	Gm16740	47.1413	44.1007	22.2641	18.5383	-1.00456	0.00673448
ENSMUSG00000027849	Syt6	81.8361	83.4292	54.7491	56.5339	-0.574635	0.00675018
ENSMUSG00000036437	Npy1r	56.1061	34.1524	31.5518	29.4021	-0.782147	0.0067901
ENSMUSG00000033949	Trim36	74.4751	55.1417	46.6946	33.0608	-0.711226	0.00679638
ENSMUSG00000086717	Gm15655	56.7882	40.873	27.0453	32.6255	-1.04891	0.00708
ENSMUSG00000006958	Chrd	242.324	227.167	166.523	108.221	-0.543514	0.00723501
ENSMUSG00000038155	Gstp2	11.0097	23.452	1.23566	20.1099	-2.69875	0.00727131
ENSMUSG00000048707	Tprn	307.768	296.577	185.192	168.388	-0.729736	0.0076034
ENSMUSG00000020904	Cfap52	113.339	67.6716	75.134	44.324	-0.593368	0.00780363
ENSMUSG00000042073	Abhd14b	170.343	144.18	110.873	76.1167	-0.602016	0.00788904
ENSMUSG00000020434	4921536K21Rik	74.0132	69.0082	48.5688	45.0854	-0.60809	0.00789367
ENSMUSG00000097750	Gm4673	81.6046	79.069	53.9748	38.063	-0.583759	0.00794063
ENSMUSG00000097571	Jpx	82.1022	81.9114	51.4509	41.4693	-0.622517	0.00862908
ENSMUSG00000040631	Dok4	135.317	104.522	86.4808	60.8211	-0.656761	0.00882254
ENSMUSG00000040543	Pitpnm3	81.6507	29.9658	53.813	48.0055	-0.627328	0.00912224
ENSMUSG00000021835	Bmp4	72.813	69.5217	47.9004	42.1652	-0.615936	0.00927917
ENSMUSG00000025993	Slc40a1	84.7374	50.3907	52.6259	29.1975	-0.677269	0.00940069
ENSMUSG00000097328	Tnfsf12	103.06	75.7374	70.6901	64.3015	-0.526814	0.01031
ENSMUSG00000043687	1190005I06Rik	59.6926	26.6861	27.7344	15.1362	-1.0988	0.0104832
ENSMUSG00000074218	Cox7a1	80.0649	79.095	48.5643	51.0127	-0.746241	0.0120683
ENSMUSG00000060600	Eno3	97.9168	91.4495	66.1047	62.7422	-0.550887	0.0133914
ENSMUSG00000038756	Ttll6	66.0442	46.854	35.685	24.9908	-0.844789	0.0134164
ENSMUSG00000036964	Trim17	46.4177	39.2245	22.1097	15.6862	-1.01645	0.0142025
ENSMUSG00000026791	Slc2a8	224.21	220.316	157.067	155.579	-0.513098	0.0145299
ENSMUSG00000020707	Rnf135	164.89	302.165	110.75	229.382	-0.562338	0.0150844
ENSMUSG00000073077	Gm7173	102.872	149.018	69.7307	82.9222	-0.548938	0.0151641
ENSMUSG00000078451	Ppil6	92.3984	74.1946	55.987	24.6935	-0.705719	0.0154979
ENSMUSG00000027676	Ccdc39	666.453	452.655	443.209	333.24	-0.58575	0.0158497
ENSMUSG00000025450	Gm9752	100.894	82.718	69.7654	68.2921	-0.540329	0.0165155
ENSMUSG00000000627	Sema4f	85.8053	71.9361	52.3844	62.0029	-0.676291	0.0176716
ENSMUSG00000030688	Stard10	520.802	429.337	359.871	321.811	-0.531433	0.0186138
ENSMUSG00000102725	Gm37939	72.7813	31.1799	38.9141	33.2449	-0.94307	0.0212141
ENSMUSG00000090877	Hspa1b	169.91	148.922	118.91	128.747	-0.528553	0.0218603
ENSMUSG00000034173	Zbed5	132.43	158.98	81.2549	156.932	-0.683403	0.0240231
ENSMUSG00000027188	Pamr1	145.664	157.316	100.812	119.931	-0.527075	0.0269593
ENSMUSG00000023990	Tfeb	490.172	469.084	343.099	263.803	-0.515666	0.0298095
ENSMUSG00000044628	Rnf208	176.062	279.56	109.172	199.015	-0.688201	0.0318797
ENSMUSG00000057143	Trim12c	148.599	688.563	103.387	643.305	-0.520229	0.0374532
ENSMUSG00000064125	Prr36	257.944	202.896	171.925	150.904	-0.578968	0.0486489

## Sheet: Astrocyte_up
Genes upregulated by CXCR3-deficiency in astrocytes
ENSEMBL ID	Gene symbol	Mean normalized count				Log2 fold change	FDR
		uninfected WT	infected WT	uninfected KO	infected KO
ENSMUSG00000062382	Ftl1-ps1	58.4412	97.9399	8044.87	10756	7.10066	0
ENSMUSG00000070348	Ccnd1	5400.37	6071.35	22631.7	23213.1	2.06884	4.99351e-137
ENSMUSG00000020427	Igfbp3	7104.15	12854.3	22282.4	28224.3	1.65092	6.68468e-86
ENSMUSG00000042671	Rgs8	498.476	2679.24	2116.44	5251.64	2.08859	1.03776e-84
ENSMUSG00000019960	Dusp6	444.69	427.878	1477.58	1740.99	1.73442	1.0606e-73
ENSMUSG00000000184	Ccnd2	6549.13	8221.83	17891	20170.9	1.45152	1.64272e-69
ENSMUSG00000024486	Hbegf	552.272	1036.61	1770.84	3535.13	1.6825	7.40343e-68
ENSMUSG00000013089	Etv5	1264.39	1582.8	3537.43	3602.56	1.48593	1.17066e-66
ENSMUSG00000056758	Hmga2	386.237	557.751	1120.58	1828.52	1.53815	6.23533e-56
ENSMUSG00000037211	Spry1	210.278	279.823	813.031	899.744	1.9494	1.70896e-54
ENSMUSG00000021070	Bdkrb2	614.492	1283.32	1622.02	2836.41	1.40259	1.49609e-50
ENSMUSG00000063506	Arhgap22	98.9936	167.438	389.853	419.511	1.97452	3.67973e-50
ENSMUSG00000031465	Angpt2	649.933	616.21	1820.21	1506.07	1.48726	1.22709e-49
ENSMUSG00000032487	Ptgs2	136.999	1987.27	453.63	3108.85	1.72988	4.16157e-49
ENSMUSG00000005410	Mcm5	805.645	895.033	2001.01	2047.8	1.31384	7.39657e-49
ENSMUSG00000039830	Olig2	1685.24	913.696	4791.71	3109.14	1.50946	1.40007e-48
ENSMUSG00000037411	Serpine1	1484.88	5201.96	4591.28	9470.6	1.63023	2.76345e-47
ENSMUSG00000054555	Adam12	3908.62	5743.1	8857.86	9001.75	1.18195	7.71738e-45
ENSMUSG00000051855	Mest	2879.53	3485.18	6467.97	6600.79	1.16922	9.09538e-45
ENSMUSG00000004891	Nes	8678.94	8398.93	19546.9	18170.6	1.17302	4.67797e-44
ENSMUSG00000067367	Lyar	333.726	440.329	879.076	1035.21	1.39556	2.67228e-40
ENSMUSG00000041859	Mcm3	809.234	1041.59	1945.19	2097.16	1.26623	3.26328e-40
ENSMUSG00000002870	Mcm2	1038.89	1161.56	2406.97	2408.38	1.21322	4.01752e-40
ENSMUSG00000025001	Hells	437.027	564.038	1279.65	1267.98	1.5522	8.00829e-40
ENSMUSG00000024427	Spry4	223.469	317.875	669.122	821.263	1.58198	4.89768e-39
ENSMUSG00000032085	Tagln	5562.68	6191.21	11698.6	12204	1.07421	9.02428e-39
ENSMUSG00000025582	Nptx1	87.8771	194.889	374.719	371.111	2.08847	1.32042e-38
ENSMUSG00000030235	Slco1c1	410.267	394.01	1086.66	885.223	1.40782	1.4254e-38
ENSMUSG00000053846	Lipg	128.836	331.54	385.708	805.885	1.58123	2.62613e-38
ENSMUSG00000029484	Anxa3	1384.18	1850.32	3251.88	3431.36	1.23364	2.71211e-38
ENSMUSG00000001349	Cnn1	512.991	596.786	1206.91	1164.95	1.23606	5.90614e-37
ENSMUSG00000050232	Cxcr3	0	0.453002	50.6002	77.8348	9.08121	6.95363e-37
ENSMUSG00000020486	Sept4	406.799	390.448	1077.64	863.277	1.40549	4.04773e-36
ENSMUSG00000045930	Clec14a	35.4622	49.4726	159.494	127.132	2.17155	2.91679e-35
ENSMUSG00000058975	Kcnc1	1793.36	1672.27	4224.15	2768.6	1.23772	1.73608e-34
ENSMUSG00000020601	Trib2	1217.96	1242.66	2609.36	2358.88	1.10097	2.47595e-34
ENSMUSG00000042228	Lyn	184.744	256.957	490.805	541.319	1.40846	4.30371e-34
ENSMUSG00000001036	Epn2	1541.52	1707.48	3197.69	2645.74	1.05457	5.31567e-34
ENSMUSG00000038587	Akap12	7823.67	8434.3	16465.6	20405.1	1.07519	1.1507e-33
ENSMUSG00000022673	Mcm4	1201.98	1403.23	2669.21	2537.84	1.15227	3.20284e-33
ENSMUSG00000042115	Klhdc8a	155.232	167.883	508.753	447.887	1.71218	5.73224e-33
ENSMUSG00000022945	Chaf1b	168.334	260.631	427.327	586.413	1.34284	4.49699e-32
ENSMUSG00000026355	Mcm6	1178.98	1438.43	2514.64	2440.87	1.09378	6.7826e-32
ENSMUSG00000059901	Adamts14	478.906	1059.54	1163.75	1704.59	1.28257	3.06619e-31
ENSMUSG00000048636	A730049H05Rik	65.9389	67.6874	224.237	168.991	1.77144	4.18842e-31
ENSMUSG00000001228	Uhrf1	1526.37	1959.07	3129.54	3251.11	1.03749	7.15923e-31
ENSMUSG00000048583	Igf2	2022.53	2211.08	4755.73	4739.48	1.23524	1.49758e-30
ENSMUSG00000059173	Pde1a	289.843	645.113	726.265	1629.62	1.3284	4.17956e-30
ENSMUSG00000021678	F2rl1	86.2523	125.066	276.826	361.504	1.67882	6.74295e-30
ENSMUSG00000067215	Usp51	23.3514	29.122	122.147	109.342	2.39281	9.41647e-30
ENSMUSG00000028184	Adgrl2	1459.23	1668.45	2939.84	2786.51	1.01222	1.14202e-29
ENSMUSG00000028212	Ccne2	258.671	384.733	703.636	758.859	1.44196	5.15129e-29
ENSMUSG00000019874	Fabp7	7619.51	6222.23	16120.5	12180.8	1.08304	7.03055e-29
ENSMUSG00000002477	Snrpd1	830.529	979.967	1712.8	1961.71	1.04475	7.43741e-29
ENSMUSG00000048458	Fam212b	490.825	387.852	1042.19	758.957	1.08781	1.26535e-28
ENSMUSG00000032113	Chek1	213.875	282.237	547.764	540.584	1.3532	2.22998e-28
ENSMUSG00000055612	Cdca7	402.093	481.636	904.907	858.234	1.1716	3.41321e-28
ENSMUSG00000017499	Cdc6	118.48	144.926	327.397	370.806	1.46492	3.95299e-28
ENSMUSG00000050069	Grem2	48.8104	60.1433	172.588	245.797	1.82552	4.61319e-28
ENSMUSG00000026475	Rgs16	699.153	3623.13	1446.64	5729.52	1.05175	4.79509e-28
ENSMUSG00000035783	Acta2	18236.6	19338.6	34584.9	34897.6	0.924885	5.41753e-28
ENSMUSG00000069793	Slfn9	427.884	2064.52	1014.48	2819.85	1.24508	1.12363e-27
ENSMUSG00000026669	Mcm10	322.672	466.811	727.726	916.156	1.17429	1.2175e-27
ENSMUSG00000027276	Jag1	449.601	549.941	944.094	1046.99	1.07184	1.2533e-27
ENSMUSG00000041324	Inhba	901.684	1334.5	2086.95	3257.83	1.21269	3.01776e-27
ENSMUSG00000024803	Ankrd1	16.9485	23.6136	89.1477	121.555	2.39925	3.96394e-27
ENSMUSG00000007080	Pole	700.557	853.376	1450.2	1495.56	1.0505	4.04872e-27
ENSMUSG00000022114	Spry2	962.642	832.009	1894.79	1818.98	0.977718	6.93691e-27
ENSMUSG00000028780	Sema3c	306.285	612.104	681.208	1206.95	1.15429	8.43747e-27
ENSMUSG00000017724	Etv4	590.384	688.068	1564.65	1578.37	1.40721	1.85621e-26
ENSMUSG00000052889	Prkcb	605.067	646.505	1210.63	884.686	1.00223	2.01813e-26
ENSMUSG00000020649	Rrm2	2079.91	2272.2	4247.69	4020.36	1.03164	2.2778e-26
ENSMUSG00000000782	Tcf7	226.968	312.315	578.73	758.852	1.3525	2.7246e-26
ENSMUSG00000036097	Slf2	1487.36	2532.66	3216.08	5852.83	1.11419	3.55866e-26
ENSMUSG00000027955	Fam198b	416.175	608.881	854.143	962.394	1.04007	9.47173e-26
ENSMUSG00000032036	Kirrel3	178.495	199.742	413.694	389.772	1.21207	1.06477e-25
ENSMUSG00000039994	Timeless	427.372	618.68	885.314	1003.81	1.05225	1.11418e-25
ENSMUSG00000027342	Pcna	1885.24	2062.21	3645.43	3928.76	0.95266	1.13151e-25
ENSMUSG00000057329	Bcl2	320.847	351.528	738.574	740.067	1.20741	1.38928e-25
ENSMUSG00000028364	Tnc	23054.1	41818.1	41424.8	58600.7	0.84717	1.61282e-25
ENSMUSG00000039748	Exo1	178.62	214.875	407.313	483.302	1.19004	2.09655e-25
ENSMUSG00000009772	Nuak2	164.737	187.957	397.738	384.824	1.27406	2.71282e-25
ENSMUSG00000001995	Sipa1l2	1171.45	1306.67	2264.97	2467.79	0.952619	2.95572e-25
ENSMUSG00000027405	Nop56	903.035	1162.79	1734.86	2380.35	0.944026	4.67656e-25
ENSMUSG00000025314	Ptprj	1937.36	2986.42	3705.03	4078.89	0.937169	5.41886e-25
ENSMUSG00000000028	Cdc45	247.732	290.271	538.081	604.737	1.11937	8.91731e-25
ENSMUSG00000039037	St6galnac5	59.0718	50.5188	192.25	111.876	1.71367	1.50665e-24
ENSMUSG00000031530	Dusp4	127.226	219.854	393.864	549.775	1.62497	1.75773e-24
ENSMUSG00000027397	Slc20a1	1231.7	2125.83	2448.69	3532.61	0.993105	3.4746e-24
ENSMUSG00000027018	Hat1	700.614	929.274	1474.91	1558.51	1.07564	5.3296e-24
ENSMUSG00000025574	Tk1	606.618	650.937	1197.65	1056.32	0.981921	5.3296e-24
ENSMUSG00000032366	Tpm1	8374.81	9818.17	15346.8	17089	0.875457	1.17492e-23
ENSMUSG00000004665	Cnn2	2524.72	2841.42	4610.89	4705.05	0.870389	1.96004e-23
ENSMUSG00000033970	Rfc3	240.043	283.329	526.224	616.242	1.13193	2.32945e-23
ENSMUSG00000042489	Clspn	774.46	935.431	1604.25	1659.65	1.05296	2.54317e-23
ENSMUSG00000024691	Fam111a	493.111	571.931	1123.2	1249.05	1.18932	2.58818e-23
ENSMUSG00000032511	Scn5a	177.444	215.926	421.577	537.485	1.25416	1.0943e-22
ENSMUSG00000019124	Scrn1	5137.43	4283.79	9173.89	6769.64	0.838136	1.27424e-22
ENSMUSG00000017146	Brca1	629.714	818.093	1324.74	1319.4	1.07411	1.36765e-22
ENSMUSG00000025912	Mybl1	989.257	1248.13	2334.15	2693.15	1.24006	1.53747e-22
ENSMUSG00000022422	Dscc1	36.0634	42.7343	120.792	98.9263	1.73558	1.92276e-22
ENSMUSG00000049420	Tmem200a	128.226	211.713	343.172	517.35	1.4235	2.47842e-22
ENSMUSG00000021556	Golm1	1676.89	1855.66	3129.54	2838.56	0.901835	5.08788e-22
ENSMUSG00000026819	Slc25a25	776.385	1175.19	1492.36	2113.94	0.944689	5.21252e-22
ENSMUSG00000022814	Umps	392.753	445.119	777.134	973.456	0.985456	6.30367e-22
ENSMUSG00000006445	Epha2	166.063	303.49	417.777	773.173	1.33157	6.56818e-22
ENSMUSG00000025747	Tyms	260.139	267.714	534.751	636.558	1.0394	6.67506e-22
ENSMUSG00000025650	Col7a1	3262.3	3930.17	5883.27	5738.89	0.852259	8.18164e-22
ENSMUSG00000005732	Ranbp1	1890.96	2121.71	3470.57	4217.96	0.87736	9.30533e-22
ENSMUSG00000046223	Plaur	39.5517	77.3378	124.886	253.091	1.65075	1.43429e-21
ENSMUSG00000038894	Irs2	1745.76	2341.26	3629.63	4008	1.05768	1.55798e-21
ENSMUSG00000029304	Spp1	3056.87	4649.95	5639.3	9239.18	0.884896	2.36848e-21
ENSMUSG00000024165	Hn1l	1366.2	1922.2	2469.1	3073.22	0.855213	3.5228e-21
ENSMUSG00000022591	Gm9747	0	0	57.9141	39.7898	9.24716	4.20171e-21
ENSMUSG00000020075	Ddx21	1208.53	1409.01	2500.72	2910.43	1.05055	4.28853e-21
ENSMUSG00000037474	Dtl	495.566	660.197	987.703	1077.38	0.997639	4.54197e-21
ENSMUSG00000019942	Cdk1	1382.02	1575.38	2558.63	2738.07	0.889771	4.89071e-21
ENSMUSG00000020407	Upp1	150.475	274.886	363.431	568.257	1.27185	6.77327e-21
ENSMUSG00000045294	Insig1	900.057	1917.97	1637.14	2482.14	0.864727	6.83998e-21
ENSMUSG00000040204	Pclaf	1378.93	1610.66	2802.85	2911.69	1.02525	7.2658e-21
ENSMUSG00000022537	Tmem44	879.257	779.003	1627.24	1171.53	0.889546	9.5426e-21
ENSMUSG00000040152	Thbs1	4615.14	6598.67	7954.2	10947.3	0.786978	1.01496e-20
ENSMUSG00000051220	Ercc6l	301.876	352.836	687.59	737.051	1.188	1.09764e-20
ENSMUSG00000057604	Lmcd1	65.7857	65.6164	213.199	206.51	1.69669	1.28728e-20
ENSMUSG00000037572	Wdhd1	290.392	516.271	609.06	819.856	1.07034	1.42364e-20
ENSMUSG00000024659	Anxa1	921.7	1237.85	1675.6	2119.4	0.863386	1.66283e-20
ENSMUSG00000029814	Igf2bp3	427.125	486.809	806.482	731.128	0.917945	1.86622e-20
ENSMUSG00000056394	Lig1	1049.45	1486.83	1954.46	2373.05	0.898989	2.39032e-20
ENSMUSG00000027203	Dut	404.965	473.067	866.878	948.981	1.09631	2.39241e-20
ENSMUSG00000047547	Cltb	1844.83	2020.28	3236.12	3564.51	0.812026	3.11121e-20
ENSMUSG00000020534	Shmt1	210.159	343.328	463.21	630.629	1.13937	3.62895e-20
ENSMUSG00000029802	Abcg2	485.125	566.204	935.009	1104.71	0.947442	3.86076e-20
ENSMUSG00000036006	Ripor2	176.165	137.424	376.638	328.836	1.10296	5.19189e-20
ENSMUSG00000079657	Rab26	258.953	253.388	516.491	335.754	0.997228	9.11909e-20
ENSMUSG00000030254	Rad18	318.659	434.393	640.104	746.31	1.00534	1.19999e-19
ENSMUSG00000028069	Gpatch4	115.444	120.277	259.237	303.594	1.16851	1.20685e-19
ENSMUSG00000031562	Dctd	153.475	236.817	331.619	466.433	1.11027	1.20685e-19
ENSMUSG00000058927	Gm10053	1660.64	1724.46	3009.3	3077.09	0.858987	1.28743e-19
ENSMUSG00000046318	Ccbe1	59.7365	71.4766	186.783	214.136	1.63526	1.47113e-19
ENSMUSG00000029761	Cald1	6972.55	7700.26	11924.8	13136.6	0.775868	2.01149e-19
ENSMUSG00000017817	Jph2	137.632	256.757	325.739	370.619	1.24306	3.0638e-19
ENSMUSG00000042354	Gnl3	355.403	550.729	669.821	980.482	0.914603	4.0365e-19
ENSMUSG00000055945	Prr18	144.179	76.4095	339.574	136.134	1.23076	4.95133e-19
ENSMUSG00000029730	Mcm7	1435.87	1740.05	2583.14	3131.6	0.849113	5.62029e-19
ENSMUSG00000026547	Tagln2	4527.45	7157.36	7819.43	9710.31	0.790139	5.64173e-19
ENSMUSG00000026020	Nop58	820.456	1001.45	1581.4	1794.59	0.948949	6.76571e-19
ENSMUSG00000075297	H60b	34.0794	41.8069	112.32	100.452	1.72983	6.8427e-19
ENSMUSG00000030657	Xylt1	1995.69	1813.75	3491.43	2430.6	0.808606	7.86202e-19
ENSMUSG00000002718	Cse1l	1805.08	1848.9	3069.66	3340.42	0.76771	8.0765e-19
ENSMUSG00000001473	Tubb6	2937.32	3874.77	5461.19	6430.11	0.89637	9.17814e-19
ENSMUSG00000027323	Rad51	300.247	390.299	618.15	639.651	1.04179	1.21559e-18
ENSMUSG00000004151	Etv1	691.113	687.815	1404.2	1111.13	1.02372	1.33833e-18
ENSMUSG00000032555	Topbp1	1727.93	1952.49	3124.04	3443.83	0.855969	1.35869e-18
ENSMUSG00000049866	Arl4c	2067.04	2496.88	3584.46	4616.59	0.795691	1.38557e-18
ENSMUSG00000032640	Chsy1	1498.88	1704.1	2606.14	2851.19	0.799071	1.58002e-18
ENSMUSG00000011256	Adam19	1914.31	2055.01	3263.27	3197.18	0.771277	1.76547e-18
ENSMUSG00000040274	Cdk6	1669.79	3320.06	2882.68	5001.06	0.789731	1.93235e-18
ENSMUSG00000036800	Fam135b	42.8361	46.9208	132.602	119.167	1.62772	2.00847e-18
ENSMUSG00000035455	Fignl1	379.308	496.98	829.906	982.875	1.13151	2.97102e-18
ENSMUSG00000048148	Nwd1	1403.2	1421.07	2439.04	2011.49	0.799516	2.97606e-18
ENSMUSG00000059743	Fdps	547.102	1179.71	993.333	1713.75	0.860801	3.27258e-18
ENSMUSG00000024742	Fen1	335.82	342.767	629.735	668.699	0.906291	3.49563e-18
ENSMUSG00000036872	Abcc12	52.0905	100.895	145.241	256.745	1.47726	3.69397e-18
ENSMUSG00000036438	Calm2	4516.55	5240.47	7857.86	8500.5	0.800436	4.95292e-18
ENSMUSG00000040998	Npnt	670.357	670.366	1192.15	990.751	0.833116	5.31997e-18
ENSMUSG00000031453	Rasa3	2422.77	3409.02	4065.66	4015.52	0.748584	6.17741e-18
ENSMUSG00000026873	Phf19	390.962	395.288	731.772	682.015	0.904638	6.55739e-18
ENSMUSG00000030878	Cdr2	184.691	269.59	381.029	485.713	1.04582	6.85115e-18
ENSMUSG00000001305	Rrp15	214.582	240.568	471.242	570.789	1.13275	7.13424e-18
ENSMUSG00000014813	Stc1	207.914	325.165	420.721	499.584	1.02201	7.36916e-18
ENSMUSG00000033715	Akr1c14	305.571	465.8	591.484	674.535	0.953993	7.49991e-18
ENSMUSG00000078452	Raet1d	45.7889	72.571	147.02	162.191	1.67113	7.67585e-18
ENSMUSG00000045751	Mms22l	285.889	355.126	546.978	544.613	0.938886	8.53866e-18
ENSMUSG00000026657	Frmd4a	1211.7	1602.18	2081.15	2646.59	0.781625	1.02843e-17
ENSMUSG00000097493	9930014A18Rik	45.314	59.6318	142.98	143.552	1.65566	1.04056e-17
ENSMUSG00000097428	AW047730	301.316	192.688	640.949	391.19	1.09036	1.12932e-17
ENSMUSG00000063060	Sox7	42.7492	122.898	127.341	451.648	1.58356	1.13893e-17
ENSMUSG00000056306	Sertm1	28.5906	34.0836	105.307	64.3346	1.86512	1.24769e-17
ENSMUSG00000083379	Gm4919	0.564227	3.65278	27.6768	40.2935	5.40756	1.30143e-17
ENSMUSG00000038917	3930402G23Rik	41.1762	67.7301	147.364	177.296	1.82722	2.10135e-17
ENSMUSG00000069601	Ank3	1179.98	2041.68	2025.26	2615.2	0.780861	2.79447e-17
ENSMUSG00000020869	Lrrc59	2723.86	3545.99	4602.84	5407.46	0.758348	2.97584e-17
ENSMUSG00000028560	Usp1	1141.27	1537.76	2144.44	2560.07	0.911615	3.33753e-17
ENSMUSG00000038279	Nop2	419.743	440.962	772.986	953.756	0.879827	5.05288e-17
ENSMUSG00000097156	Gm3764	4366.92	3406.58	7424.68	5791.76	0.7674	5.97917e-17
ENSMUSG00000028883	Sema3a	358.357	585.386	653.615	983.016	0.868599	7.56461e-17
ENSMUSG00000030093	Wnt7a	317.565	471.809	581.462	578.61	0.874179	8.89065e-17
ENSMUSG00000025395	Prim1	270.642	252.531	509.033	497.24	0.91066	1.00765e-16
ENSMUSG00000021714	Cenpk	150.777	150.431	320.039	238.58	1.07928	1.15293e-16
ENSMUSG00000021115	Vrk1	515.771	607.096	928.015	904.557	0.848671	1.93947e-16
ENSMUSG00000039959	Hip1	5418.89	4170.02	8793.39	5813.91	0.700004	2.12567e-16
ENSMUSG00000006585	Cdt1	140.834	231.176	340.631	438.329	1.27482	2.18197e-16
ENSMUSG00000032193	Ldlr	577.578	1248.08	1081.13	1668.21	0.904169	2.32702e-16
ENSMUSG00000002835	Chaf1a	509.69	564.562	933.949	988.678	0.8753	2.79444e-16
ENSMUSG00000020949	Fkbp3	1731.76	1997.19	2923.41	2930.46	0.756463	3.30169e-16
ENSMUSG00000031119	Gpc4	2650.02	3032.12	4358.82	4008.78	0.719867	3.84624e-16
ENSMUSG00000021707	Dhfr	466.192	478.561	870.88	768.478	0.904215	4.00431e-16
ENSMUSG00000091243	Vgll3	268.925	351.827	511.952	551.458	0.928496	4.01303e-16
ENSMUSG00000078453	Abracl	245.189	297.271	475.103	552.771	0.953532	4.95781e-16
ENSMUSG00000022322	Shcbp1	438.812	415.664	813.716	712.895	0.891129	5.03327e-16
ENSMUSG00000030978	Rrm1	3832.73	4256.24	6399.85	6514.23	0.741216	6.65867e-16
ENSMUSG00000058006	Mdn1	1068.77	1233.82	1909.8	2290.38	0.839367	7.9727e-16
ENSMUSG00000031012	Cask	1806.19	2327.73	3039.11	3407.07	0.75239	8.58818e-16
ENSMUSG00000001056	Nhp2	502.709	608.186	929.233	1140.31	0.884493	9.08464e-16
ENSMUSG00000067879	3110035E14Rik	59.3855	55.3756	148.032	159.099	1.31814	9.70809e-16
ENSMUSG00000043051	Disc1	65.937	80.1533	160.054	105.086	1.26663	1.00792e-15
ENSMUSG00000089945	Pakap	460.976	819.739	831.613	1222.89	0.856054	1.0983e-15
ENSMUSG00000049511	Htr1b	64.5755	91.7808	163.567	199.938	1.34426	1.10473e-15
ENSMUSG00000038567	Cyp24a1	6.77651	13.603	42.4531	74.4991	2.66594	1.121e-15
ENSMUSG00000029414	Kntc1	761.247	770.986	1335.22	1269.32	0.812867	1.19484e-15
ENSMUSG00000022246	Rai14	876.214	1860.47	1509	2758.06	0.784611	1.19762e-15
ENSMUSG00000022021	Diaph3	717.963	668.746	1274.68	1135.6	0.83024	1.22403e-15
ENSMUSG00000022360	Atad2	1098.56	1216.4	2127.62	2212.47	0.954934	1.34246e-15
ENSMUSG00000100113	Gm28592	0	0	18.1904	10.7764	7.5443	1.35801e-15
ENSMUSG00000021175	Cdca7l	193.62	240.918	401.104	383.606	1.04406	1.43348e-15
ENSMUSG00000004099	Dnmt1	2941.07	3366.09	4788.38	4982.16	0.704508	1.54765e-15
ENSMUSG00000021569	Trip13	170.286	187.76	341.09	365.996	0.999495	1.89734e-15
ENSMUSG00000038264	Sema7a	392.112	362.512	696.776	641.426	0.830515	2.28411e-15
ENSMUSG00000046178	Nxph1	23.8103	43.2876	78.6406	98.4793	1.7059	2.85275e-15
ENSMUSG00000031799	Tpm4	6663.78	8466.92	10968.2	13067.2	0.720662	3.10891e-15
ENSMUSG00000006715	Gmnn	318.756	354.257	597.374	630.531	0.90567	3.11272e-15
ENSMUSG00000062345	Serpinb2	1.95716	9.99199	25.4934	69.1199	3.59404	3.27908e-15
ENSMUSG00000033207	Mamdc2	1122.05	1147.19	1892.17	1344.86	0.755685	3.31668e-15
ENSMUSG00000041238	Rbbp8	433.454	497.451	751.786	814.255	0.796505	3.96232e-15
ENSMUSG00000028633	Ctps	828.135	2701.69	1629.87	3770.03	0.978454	4.05679e-15
ENSMUSG00000027641	Rbl1	531.527	756.846	967.808	1047.39	0.867258	4.6468e-15
ENSMUSG00000095567	Noc2l	1051.06	1342.1	1803.91	2296.48	0.780193	5.01342e-15
ENSMUSG00000042606	Hirip3	912.498	938.056	1607.57	1573.06	0.817304	5.79256e-15
ENSMUSG00000000568	Hnrnpd	3400.34	3839.64	5479.78	5564.51	0.690008	5.91234e-15
ENSMUSG00000059991	Nptx2	208.409	219.47	430.654	309.364	1.04701	5.9216e-15
ENSMUSG00000062510	Nsl1	221.197	240.144	422.412	365.494	0.936731	6.10668e-15
ENSMUSG00000031527	Eri1	689.452	747.016	1408.68	1467.79	1.03257	7.20073e-15
ENSMUSG00000039187	Fanci	522.665	538.29	905.24	807.159	0.794289	7.30127e-15
ENSMUSG00000031112	Stk26	15.2911	29.0718	60.2588	76.3401	2.00257	7.61985e-15
ENSMUSG00000100685	Gm28610	1.64921	11.3473	23.6078	27.9858	3.72945	7.81821e-15
ENSMUSG00000015134	Aldh1a3	97.4437	187.695	214.221	339.309	1.14441	7.90746e-15
ENSMUSG00000022443	Myh9	13005.6	15773	20739.3	23915.5	0.674946	8.41152e-15
ENSMUSG00000017861	Mybl2	308.292	420.84	610.73	861.825	0.986951	9.6186e-15
ENSMUSG00000074813	Gm14005	53.1776	74.1241	154.075	216.363	1.53812	1.01582e-14
ENSMUSG00000040034	Nup43	101.174	115.481	221.572	259.94	1.13628	1.28417e-14
ENSMUSG00000026974	Zmynd19	234.344	263.42	434.337	500.524	0.886076	1.50435e-14
ENSMUSG00000045671	Spred2	1138.93	1661.4	1901.27	2248.19	0.740421	1.60951e-14
ENSMUSG00000000489	Pdgfb	53.012	530.281	141.442	898.25	1.41272	1.66066e-14
ENSMUSG00000026764	Kif5c	699.048	1401.98	1174.31	1766.59	0.750752	1.68458e-14
ENSMUSG00000021719	Rgs7bp	243.77	207.83	438.48	316.36	0.850821	1.74259e-14
ENSMUSG00000022528	Hes1	183.128	225.45	437.997	595.864	1.25903	1.76203e-14
ENSMUSG00000049288	Lix1l	2207.14	2635.27	3569.99	3528.76	0.695665	1.87877e-14
ENSMUSG00000015176	Nolc1	1094.55	1260.89	1851.86	2584.32	0.759105	2.41768e-14
ENSMUSG00000070639	Lrrc8b	2024.32	2480.94	3211.82	3433.89	0.667361	2.44378e-14
ENSMUSG00000028884	Rpa2	341.037	388.2	603.905	641.996	0.822866	2.6466e-14
ENSMUSG00000037347	Chst7	218.897	226.422	475.6	457.151	1.1203	5.03742e-14
ENSMUSG00000062184	Hs6st2	280.256	418.121	565.915	652.549	1.01607	6.44259e-14
ENSMUSG00000024044	Epb41l3	1383.74	1691.29	2337.2	2637.2	0.757278	6.60592e-14
ENSMUSG00000021388	Aspn	16.835	15.972	60.1271	34.3233	1.82279	7.70633e-14
ENSMUSG00000028718	Stil	491.908	563.279	832.441	839.738	0.761703	8.33541e-14
ENSMUSG00000037991	Rmi2	42.908	62.0305	121.896	125.132	1.49331	8.33541e-14
ENSMUSG00000054079	Utp18	458.705	485.218	802.027	872.603	0.806607	8.69575e-14
ENSMUSG00000001870	Ltbp1	1675.65	2373.29	2681.57	3228.6	0.679916	9.32541e-14
ENSMUSG00000097709	2810429I04Rik	95.294	120.163	199.879	167.271	1.06831	1.02546e-13
ENSMUSG00000023150	Ivns1abp	2015.42	3307.53	3270.54	4842.23	0.699971	1.07331e-13
ENSMUSG00000038119	Cdon	1678.58	1444.98	2676.02	1949.1	0.67412	1.11648e-13
ENSMUSG00000029591	Ung	112.009	148.087	264.86	261.584	1.23947	1.12099e-13
ENSMUSG00000025324	Atp10a	409.157	1019.83	720.546	1367.12	0.820529	1.28349e-13
ENSMUSG00000036371	Serbp1	6903.49	7507.7	10875.3	11993.2	0.65725	1.28359e-13
ENSMUSG00000019303	Psmc3ip	237.201	222.426	453.298	411.779	0.933752	1.36759e-13
ENSMUSG00000025134	Alyref	846.049	934.132	1377.28	1468.12	0.70454	1.36759e-13
ENSMUSG00000052316	Lrrc15	456.107	477.145	842.577	656.542	0.885957	1.36929e-13
ENSMUSG00000023919	Cenpq	398.385	449.583	684.853	655.261	0.781855	1.67159e-13
ENSMUSG00000042029	Ncapg2	1060.02	1274.64	1942.28	1913.98	0.875678	1.84607e-13
ENSMUSG00000018697	Aatf	301.901	317.62	540.488	509.748	0.841253	1.95307e-13
ENSMUSG00000047344	Lancl3	67.6516	90.0831	192.219	286.45	1.51119	2.08036e-13
ENSMUSG00000028693	Nasp	2215.64	2351.99	4247.5	4288.2	0.94028	2.09263e-13
ENSMUSG00000059796	Eif4a1	7096.12	8031.56	10919.6	12510.3	0.623522	2.10137e-13
ENSMUSG00000034206	Polq	374.763	410.089	712.913	688.675	0.931029	2.11421e-13
ENSMUSG00000041313	Slc7a1	713.189	1519.35	1254.77	1879.48	0.816284	2.72532e-13
ENSMUSG00000030346	Rad51ap1	277.687	320.614	530.774	471.808	0.934261	2.81668e-13
ENSMUSG00000006678	Pola1	729.646	672.545	1551.97	1431.09	1.09069	3.19071e-13
ENSMUSG00000026049	Tex30	100.971	147.915	211.378	237.024	1.07304	3.33049e-13
ENSMUSG00000020706	Ftsj3	734.497	744.284	1302.95	1592.47	0.826808	3.74109e-13
ENSMUSG00000037070	Rbmxl1	1434.76	1598.1	2340.97	2563	0.706875	3.94448e-13
ENSMUSG00000024525	Impa2	125.789	147.792	267.96	252.878	1.08498	4.14207e-13
ENSMUSG00000027379	Bub1	900.042	1016.79	1573.23	1574.98	0.807229	4.50413e-13
ENSMUSG00000027115	Kif18a	616.734	683.915	1074.9	960.384	0.802435	5.00829e-13
ENSMUSG00000036875	Dna2	175.309	173.742	361.793	321.07	1.04682	5.54328e-13
ENSMUSG00000025278	Flnb	6815.38	9039.06	10589.1	13695.8	0.637391	5.8018e-13
ENSMUSG00000025630	Hprt	449.922	666.229	764.765	996.085	0.765338	5.92306e-13
ENSMUSG00000051278	Zgrf1	367.876	419.897	678.922	647.19	0.887095	6.23073e-13
ENSMUSG00000037239	Spred3	539.163	722.357	925.224	1018.06	0.782125	6.25457e-13
ENSMUSG00000028261	Ndufaf4	307.125	259.729	550.656	503.418	0.843787	7.54881e-13
ENSMUSG00000003411	Rab3b	499.161	479.425	839.595	779.634	0.752574	7.77386e-13
ENSMUSG00000054766	Set	3368.54	3890.58	5271.98	6103.01	0.647743	8.36614e-13
ENSMUSG00000061613	U2af1	1120.39	1308.94	1834.74	2035.08	0.712406	8.43727e-13
ENSMUSG00000022434	Fam118a	239.663	281.948	453.834	514.052	0.922246	8.84583e-13
ENSMUSG00000024511	Rab27b	127.121	81.2383	259.52	189.934	1.02594	1.08397e-12
ENSMUSG00000074971	Fibin	244.729	265.487	474.001	517.577	0.956802	1.08477e-12
ENSMUSG00000021701	Plk2	415.595	692.911	727.63	1113.86	0.808271	1.13986e-12
ENSMUSG00000035439	Haus8	296.203	317.206	507.846	528.733	0.77691	1.20589e-12
ENSMUSG00000020018	Snrpf	594.814	597.353	972.832	1123.52	0.710682	1.21835e-12
ENSMUSG00000036777	Anln	1956.84	2113.23	3383.28	3477.39	0.791444	1.31899e-12
ENSMUSG00000001525	Tubb5	13549.3	17523.5	20607	23900.4	0.606667	1.3688e-12
ENSMUSG00000025927	Tfap2b	45.9545	45.0374	114.573	106.55	1.32256	1.78128e-12
ENSMUSG00000028010	Gar1	253.89	315.141	437.477	544.9	0.785907	1.84463e-12
ENSMUSG00000020387	Jade2	129.423	298.989	256.496	594.191	0.992071	1.94042e-12
ENSMUSG00000020019	Ntn4	964.116	1112.46	1579.21	1278.91	0.714118	2.09962e-12
ENSMUSG00000038759	Nup205	1866.89	2145.94	2959.78	3250.52	0.666233	2.14168e-12
ENSMUSG00000005470	Asf1b	185.773	182.292	354.512	310.828	0.933858	2.28233e-12
ENSMUSG00000020974	Pole2	116.06	155.025	234.622	252.332	1.02391	2.45235e-12
ENSMUSG00000038335	Tsr1	455.692	468.004	745.873	792.794	0.713264	2.51059e-12
ENSMUSG00000016257	Prelid3b	779.07	747.931	1234.67	1265.25	0.665469	2.5502e-12
ENSMUSG00000097769	Snhg4	120.953	151.49	230.862	264.726	0.935498	2.61062e-12
ENSMUSG00000027800	Tm4sf1	299.656	388.73	513.43	809.235	0.777566	2.63882e-12
ENSMUSG00000041506	Rrp9	174.115	194.18	320.355	437.375	0.876837	2.79227e-12
ENSMUSG00000036992	Nxt1	203.32	227.597	382.115	372.776	0.909109	2.96044e-12
ENSMUSG00000034997	Htr2a	28.6751	66.3729	79.5928	150.499	1.49355	3.01072e-12
ENSMUSG00000007682	Dio2	1281.49	1227.79	2156.61	1736.36	0.753273	3.0112e-12
ENSMUSG00000020358	Hnrnpab	4847.81	5333.65	7617.22	8897.83	0.653521	3.08616e-12
ENSMUSG00000046711	Hmga1	2473.56	5183.44	4983.17	9802.5	1.01223	3.08616e-12
ENSMUSG00000034403	Pja1	751.923	679.175	1194.97	1057.36	0.669803	3.4213e-12
ENSMUSG00000047238	Mageh1	511.426	479.414	824.159	712.375	0.690008	3.46504e-12
ENSMUSG00000046447	Camk2n1	591.568	887.929	1112.7	1418.94	0.914809	3.55279e-12
ENSMUSG00000002847	Pla1a	37.7326	62.2263	98.9084	122.468	1.3989	3.55279e-12
ENSMUSG00000005233	Spc25	818.108	814.007	1372.55	1205.33	0.746902	4.55958e-12
ENSMUSG00000039356	Exosc2	182.616	199.778	337.116	392.227	0.880622	4.81373e-12
ENSMUSG00000035683	Melk	681.847	697.491	1154.05	1201.32	0.760029	4.87789e-12
ENSMUSG00000057421	Las1l	666.107	772.263	1186.92	1395.67	0.834373	5.11381e-12
ENSMUSG00000029430	Ran	3174.96	3671	4948.33	5965.74	0.6416	5.23824e-12
ENSMUSG00000052798	Nup107	437.168	461.32	810.171	1010.49	0.89106	5.30245e-12
ENSMUSG00000032254	Kif23	1397.1	1510.5	2210.63	2420.96	0.663925	5.36278e-12
ENSMUSG00000002068	Ccne1	236.808	305.014	418.168	506.48	0.821115	5.77229e-12
ENSMUSG00000044447	Dock5	867.957	1042.18	1373.16	1539.96	0.664443	6.2217e-12
ENSMUSG00000005481	Ddx39	433.614	447.344	717.512	810.279	0.729343	6.36477e-12
ENSMUSG00000061024	Rrs1	500.793	579.475	841.944	1006	0.750578	6.42911e-12
ENSMUSG00000021948	Prkcd	267.412	501.262	477.416	715.526	0.836793	6.61775e-12
ENSMUSG00000022962	Gart	937.178	1070.42	1461.78	1718.43	0.643055	6.70842e-12
ENSMUSG00000033737	Fndc3c1	394.668	439.137	654.793	704.264	0.732711	6.77837e-12
ENSMUSG00000074476	Spc24	409.106	423.94	680.581	654.262	0.735201	7.18041e-12
ENSMUSG00000032291	Crabp1	290.61	316.098	510.261	583.435	0.810687	7.93551e-12
ENSMUSG00000020099	Unc5b	601.68	869.723	1107.67	1366.53	0.881727	8.14419e-12
ENSMUSG00000032020	Ubash3b	218.931	247.771	376.589	355.265	0.786516	8.65759e-12
ENSMUSG00000046591	Ticrr	398.086	483.056	650.819	714.353	0.710612	9.03621e-12
ENSMUSG00000048706	Lurap1l	133.244	188.77	264.995	326.236	0.985582	9.18637e-12
ENSMUSG00000039031	Arhgap18	1090.87	1084.65	1870.03	1702.2	0.77962	9.62427e-12
ENSMUSG00000046402	Rbp1	1866.75	2556.72	2907.7	3603.14	0.641156	1.0365e-11
ENSMUSG00000020739	Nup85	514.19	471.86	877.826	907.05	0.774131	1.14701e-11
ENSMUSG00000072872	Rybp	361.596	416.094	600.27	711.884	0.732506	1.20518e-11
ENSMUSG00000069910	Spdl1	327.849	343.044	605.098	560.034	0.883943	1.20518e-11
ENSMUSG00000038379	Ttk	478.311	492.065	803.355	747.764	0.750239	1.25585e-11
ENSMUSG00000096937	Gm10825	40.8463	42.9013	134.058	141.198	1.71812	1.25585e-11
ENSMUSG00000038736	Nudcd1	387.95	443.955	668.181	702.437	0.784592	1.25959e-11
ENSMUSG00000027820	Mme	347.648	324.886	605.348	557.76	0.800627	1.31487e-11
ENSMUSG00000024981	Acsl5	445.321	1157.31	748.98	1261.71	0.750495	1.41785e-11
ENSMUSG00000054215	Sprr2k	4.51574	9.16028	41.6834	56.3481	3.18398	1.46038e-11
ENSMUSG00000046865	Fbl	968.492	1042.53	1569.56	1863.59	0.697897	1.47407e-11
ENSMUSG00000029174	Tbc1d1	1331.4	1900.03	2060.01	2738.1	0.630882	1.49999e-11
ENSMUSG00000026196	Bard1	335.604	404.532	597.03	575.185	0.833037	1.50871e-11
ENSMUSG00000021676	Iqgap2	1994.79	1995.02	3266.71	3009.43	0.71294	1.51786e-11
ENSMUSG00000049751	Rpl36al	937.159	1047.9	1498.23	1778.35	0.677343	1.5507e-11
ENSMUSG00000078773	Rad54b	251.551	262.933	467.686	458.696	0.896029	1.65082e-11
ENSMUSG00000024660	Incenp	1803.65	1843.43	2820.13	2724.01	0.645944	1.69798e-11
ENSMUSG00000001025	S100a6	882.134	983.351	1448.79	1683.1	0.716017	1.87599e-11
ENSMUSG00000019970	Sgk1	230.77	256.27	406.886	519.754	0.820965	1.91524e-11
ENSMUSG00000029307	Dmp1	3.07306	1.36457	23.4073	23.7724	2.87046	1.98878e-11
ENSMUSG00000001131	Timp1	764.315	4042.1	1361.92	4746.27	0.835289	2.13017e-11
ENSMUSG00000027833	Shox2	4.44765	5.93637	28.0777	22.1296	2.60359	2.47497e-11
ENSMUSG00000020089	Ppa1	688.778	1001.77	1094.4	1583.32	0.668229	2.54132e-11
ENSMUSG00000027752	Exosc8	441.801	496.54	725.618	825.696	0.716752	2.54234e-11
ENSMUSG00000030528	Blm	410.434	504.653	712.696	778.447	0.802409	2.68443e-11
ENSMUSG00000070469	Adamtsl3	804.279	786.777	1383.74	1203.04	0.784855	2.75041e-11
ENSMUSG00000024989	Cep55	775.622	889.308	1243.94	1249.72	0.683032	3.17666e-11
ENSMUSG00000002728	Naa20	394.932	501.934	649.952	682.739	0.718001	3.22645e-11
ENSMUSG00000005667	Mthfd2	365.479	620.504	634.568	1006.46	0.796682	3.57788e-11
ENSMUSG00000044646	Zbtb7c	212.116	532.946	398.604	565.449	0.9085	4.16484e-11
ENSMUSG00000029471	Camkk2	640.326	933.208	1033.42	1082.24	0.694292	4.28942e-11
ENSMUSG00000027671	Actl6a	545.965	528.28	868.357	847.075	0.669944	4.53918e-11
ENSMUSG00000001053	N4bp3	53.7818	129.05	137.217	248.494	1.34388	4.57402e-11
ENSMUSG00000034926	Dhcr24	689.936	1585.72	1165.31	1992.18	0.758047	4.6332e-11
ENSMUSG00000026305	Lrrfip1	1864.5	2574.89	3255.53	3784.81	0.805314	4.64171e-11
ENSMUSG00000042079	Hnrnpf	6432.37	7569.94	9759.53	10839.3	0.603106	4.66935e-11
ENSMUSG00000038349	Plcl1	449.154	358.963	725.57	452.847	0.692809	4.82674e-11
ENSMUSG00000001707	Eef1e1	226.744	282.506	413.315	497.196	0.862891	5.06451e-11
ENSMUSG00000017550	Atad5	420.001	496.68	742.357	819.45	0.824169	5.07764e-11
ENSMUSG00000021116	Eif2s1	1143.46	1274.98	1856.1	2125.34	0.700381	5.08408e-11
ENSMUSG00000019997	Ctgf	2479.04	2516.87	3730.98	4220.17	0.591731	6.30795e-11
ENSMUSG00000028741	Mrto4	340.03	399.794	589.803	626.198	0.79452	6.7387e-11
ENSMUSG00000050071	Bex1	182.011	209.28	367.625	473.298	1.01171	7.0634e-11
ENSMUSG00000073676	Hspe1	1477.32	1673.22	2303.81	2698.12	0.642497	7.16703e-11
ENSMUSG00000061878	Sphk1	59.9626	185.465	126.908	277.667	1.08725	7.26104e-11
ENSMUSG00000042712	Tceal9	1557.2	1754.29	2386.61	2582.48	0.616933	7.31564e-11
ENSMUSG00000027715	Ccna2	3391.33	3327.85	5093.11	4659.88	0.5882	7.33514e-11
ENSMUSG00000017716	Birc5	842.705	852.502	1341.51	1223.65	0.672877	7.58359e-11
ENSMUSG00000031278	Acsl4	640.805	1080.5	1134.58	1725.25	0.825709	8.04773e-11
ENSMUSG00000061607	Mdc1	2896.47	3151.01	4320.4	4216.54	0.578503	8.1133e-11
ENSMUSG00000035834	Polr3g	88.3377	174.209	185.094	261.738	1.07737	8.64803e-11
ENSMUSG00000025758	Plk4	529.701	609.518	992.818	1033.22	0.907534	8.7241e-11
ENSMUSG00000020330	Hmmr	1703.2	1638.73	2744.05	2401.94	0.68986	9.35176e-11
ENSMUSG00000041220	Elovl6	957.635	1501.64	1488.26	1834.46	0.637495	9.69718e-11
ENSMUSG00000024590	Lmnb1	3554	3153.92	5794.88	4946.46	0.706897	1.00641e-10
ENSMUSG00000030357	Fkbp4	2257.69	2546.01	3577.08	3903.87	0.665441	1.01169e-10
ENSMUSG00000032397	Tipin	383.725	396.62	748.998	713.093	0.965361	1.03063e-10
ENSMUSG00000057614	Gnai1	398.559	433.012	656.57	593.787	0.720698	1.06812e-10
ENSMUSG00000048922	Cdca2	1174.05	1422.68	1770.86	1758.03	0.594844	1.07324e-10
ENSMUSG00000034192	Lsm3	355.083	405.117	612.771	614.083	0.78651	1.07446e-10
ENSMUSG00000018849	Wwc1	3639.19	3852.88	5392.09	5054.15	0.568761	1.09233e-10
ENSMUSG00000024754	Tmem2	865.209	1614.6	1377.76	1915	0.672623	1.21646e-10
ENSMUSG00000002384	Bmp8b	13.7349	20.4611	46.893	42.0101	1.75412	1.33108e-10
ENSMUSG00000028195	Cyr61	2449.29	3684.29	3949.04	5937.19	0.690741	1.35802e-10
ENSMUSG00000024074	Crim1	1177.34	1721.07	1813.52	2034.48	0.625153	1.3842e-10
ENSMUSG00000021958	Pinx1	192.705	211.147	334.196	453.926	0.799182	1.45207e-10
ENSMUSG00000040896	Kcnd3	2191.09	1553.69	3271	2114.48	0.58009	1.63457e-10
ENSMUSG00000049907	Rasl11b	263.501	263.49	440.164	427.693	0.737845	1.68723e-10
ENSMUSG00000020592	Sdc1	937.275	1389.88	1543.51	1967.86	0.72103	1.6922e-10
ENSMUSG00000026532	Spta1	28.022	21.9446	80.7983	79.814	1.54253	1.72264e-10
ENSMUSG00000062075	Lmnb2	553.519	576.187	862.075	910.12	0.641102	1.76697e-10
ENSMUSG00000001467	Cyp51	1295.96	2642.88	2310.72	3498.07	0.835899	1.87268e-10
ENSMUSG00000053519	Kcnip1	105.684	117.872	201.328	252.246	0.933044	1.95816e-10
ENSMUSG00000031167	Rbm3	2900.81	2911.71	4730.62	4637.7	0.707045	1.96951e-10
ENSMUSG00000031004	Mki67	18643.6	17549.2	28708.9	24576.4	0.624442	2.02185e-10
ENSMUSG00000072568	Fam84b	513.518	747.251	860.478	944.267	0.745798	2.40213e-10
ENSMUSG00000032548	Slco2a1	46.597	178.403	118.706	264.457	1.34686	2.51608e-10
ENSMUSG00000032575	Manf	1708.46	1880.32	2529.54	3064.55	0.567575	2.78441e-10
ENSMUSG00000044934	Zfp367	527.099	629.498	844.108	858.364	0.682077	3.05022e-10
ENSMUSG00000033377	Palmd	93.04	89.2198	177.696	132.613	0.928257	3.17867e-10
ENSMUSG00000019214	Chtf18	188.817	191.234	362.816	329.384	0.942686	3.20587e-10
ENSMUSG00000027351	Spred1	2787.04	3638.5	4474.11	4864.58	0.68452	3.28623e-10
ENSMUSG00000032344	Mb21d1	47.9978	103.256	109.208	182.724	1.18871	3.32327e-10
ENSMUSG00000004044	Cavin1	5852.39	7464.99	8608.61	9740.93	0.558448	3.37054e-10
ENSMUSG00000004100	Ppan	281.314	375.564	482.68	672.24	0.77536	3.416e-10
ENSMUSG00000049553	Polr1a	967.795	1202.17	1499.46	1857.86	0.632399	3.45643e-10
ENSMUSG00000027326	Knl1	1388.43	1307.71	2275.33	1930.86	0.714445	3.74062e-10
ENSMUSG00000074676	Foxs1	23.4069	144.922	66.494	177.387	1.4782	3.89485e-10
ENSMUSG00000071708	Sms	864.161	1201.16	1375.95	1818.03	0.673173	3.89485e-10
ENSMUSG00000054115	Skp2	548.604	578.053	892.831	849.296	0.706094	4.00662e-10
ENSMUSG00000067818	Myl9	1606.53	1380.1	2551.11	2344.43	0.667523	4.35298e-10
ENSMUSG00000049583	Grm5	1990.74	1823.2	3368.7	2155.15	0.760396	4.48902e-10
ENSMUSG00000055760	Gemin6	77.6389	91.3501	163.186	182.432	1.05978	4.62901e-10
ENSMUSG00000027787	Nmd3	346.221	475.407	614.716	753.974	0.829983	4.79158e-10
ENSMUSG00000034687	Fras1	556.909	628.405	876.31	745.2	0.655662	5.15647e-10
ENSMUSG00000053007	Creb5	523.362	875.463	834.632	1085.89	0.674435	5.38018e-10
ENSMUSG00000021065	Fut8	1066.72	969.968	1710.1	1418.89	0.682748	5.64986e-10
ENSMUSG00000033166	Dis3	445.096	513.743	726.732	816.767	0.709607	5.95233e-10
ENSMUSG00000028068	Iqgap3	1046.72	1851.61	1562.53	2609.82	0.580053	5.9852e-10
ENSMUSG00000033031	C330027C09Rik	842.362	832.254	1438.01	1253.15	0.77259	5.99726e-10
ENSMUSG00000015133	Lrrk1	1065.35	1368.35	1681.09	1773.01	0.659657	6.82224e-10
ENSMUSG00000028729	Ebna1bp2	689.432	702.759	1086.8	1294.81	0.657858	7.34886e-10
ENSMUSG00000028007	Snx7	559.787	673.717	864.085	919.613	0.62821	7.58164e-10
ENSMUSG00000045273	Cenph	126.842	154.29	258.395	263.594	1.02814	7.8095e-10
ENSMUSG00000020185	E2f7	459.318	529.903	718.72	792.734	0.647211	7.85994e-10
ENSMUSG00000029147	Ppm1g	1420.46	1441.54	2232.87	2393.66	0.653847	8.00057e-10
ENSMUSG00000087138	Gm15545	103.819	103.087	232.986	215.999	1.17128	8.03217e-10
ENSMUSG00000090202	4930503B20Rik	0	6.86745	14.0069	1.65791	7.2698	8.04253e-10
ENSMUSG00000031697	Orc6	357.189	339.222	571.604	551.706	0.6775	8.18491e-10
ENSMUSG00000024378	Stard4	494.926	1355.52	817.586	1490.27	0.727169	8.19474e-10
ENSMUSG00000028587	Orc1	51.3859	90.0246	110.886	181.989	1.09387	8.3686e-10
ENSMUSG00000064127	Med14	1530.17	1538.53	2263.8	2521.67	0.567073	8.98908e-10
ENSMUSG00000030074	Gxylt2	387.261	410.38	614.799	689.057	0.671902	9.53482e-10
ENSMUSG00000021595	Nsun2	1101.02	1416.43	1675.9	2200.48	0.606458	9.62321e-10
ENSMUSG00000037278	Tmem97	445.238	775.168	735.758	1146.81	0.724588	1.02128e-09
ENSMUSG00000031217	Efnb1	757.218	905.205	1237.82	1243.95	0.710302	1.02406e-09
ENSMUSG00000026787	Gad2	118.814	112.858	241.659	168.542	1.02503	1.07381e-09
ENSMUSG00000024593	Megf10	2154.22	1979.1	3183.55	2978.58	0.565197	1.08679e-09
ENSMUSG00000075703	Selenoi	838.517	1128.87	1276.84	1355.38	0.608607	1.0948e-09
ENSMUSG00000057406	Nsd2	3749.33	4228.23	5804.23	5790.5	0.632192	1.10443e-09
ENSMUSG00000036768	Kif15	1075.9	1053.24	1804.47	1625.48	0.747448	1.11019e-09
ENSMUSG00000049521	Cdc42ep1	1038.15	1121.89	2113.07	2376.46	1.02708	1.13741e-09
ENSMUSG00000079225	Gm9531	678.592	963.376	1093.82	1559.66	0.690135	1.14482e-09
ENSMUSG00000097280	AI849053	83.6242	66.9959	217.319	98.3426	1.37265	1.18297e-09
ENSMUSG00000030867	Plk1	1543.47	1525.95	2302.15	2158.59	0.577962	1.18966e-09
ENSMUSG00000030560	Ctsc	1312.52	2152.25	2012.25	2798.27	0.617424	1.19683e-09
ENSMUSG00000059256	Gzmd	14.2972	20.4063	51.9553	44.9023	1.83307	1.19683e-09
ENSMUSG00000020492	Ska2	851.881	958.725	1273.24	1254.61	0.581734	1.23079e-09
ENSMUSG00000029169	Dhx15	2493.26	2697.51	3669	3778.71	0.559007	1.24783e-09
ENSMUSG00000023953	Polh	643.598	726.639	983.507	900.49	0.612035	1.25418e-09
ENSMUSG00000054717	Hmgb2	3514.97	3356.29	5324.61	4894.15	0.600547	1.26024e-09
ENSMUSG00000024048	Myl12a	3423.98	4345.27	5120.85	6512.04	0.582161	1.31688e-09
ENSMUSG00000041057	Wdr43	693.171	855.82	1118.36	1371.38	0.692006	1.35073e-09
ENSMUSG00000068394	Cep152	289.679	310.123	467.44	475.904	0.691806	1.38912e-09
ENSMUSG00000022033	Pbk	1621.24	1444.32	2480.8	2045.86	0.615412	1.38912e-09
ENSMUSG00000040599	Mis12	633.559	587.631	978.964	921.101	0.629895	1.38938e-09
ENSMUSG00000029246	Ppat	433.508	498.35	739.83	889.892	0.773366	1.39579e-09
ENSMUSG00000029217	Tec	125.205	169.709	227.447	319.715	0.862874	1.46159e-09
ENSMUSG00000025364	Pa2g4	2976.65	3594.05	4442.54	5216.26	0.579025	1.62336e-09
ENSMUSG00000034773	BC030867	146.304	230.478	263.991	333.58	0.853429	1.65728e-09
ENSMUSG00000031608	Galnt7	382.86	439.105	705.928	651.61	0.883604	1.73208e-09
ENSMUSG00000003779	Kif20a	1862.3	1629.51	2799.64	2493.86	0.589626	1.7765e-09
ENSMUSG00000026622	Nek2	832.299	780.304	1289.03	1107.22	0.632882	1.7896e-09
ENSMUSG00000001507	Itga3	654.612	892.761	1057.06	1403.86	0.693282	1.86736e-09
ENSMUSG00000019961	Tmpo	4291.49	4510.45	6276.47	5962.24	0.550089	2.07776e-09
ENSMUSG00000031939	Taf1d	644.812	766.517	1052.16	1127.06	0.710268	2.12452e-09
ENSMUSG00000022034	Esco2	527.843	532.831	901.539	742.528	0.772308	2.1814e-09
ENSMUSG00000048482	Bdnf	121.515	220.216	223.601	304.502	0.889084	2.19153e-09
ENSMUSG00000079685	Ulbp1	52.4362	69.1949	110.888	155.105	1.07505	2.19153e-09
ENSMUSG00000038047	Haus6	468.58	543.938	841.405	922.004	0.846626	2.28689e-09
ENSMUSG00000030609	Aen	1619.54	2241.96	2357.4	2698.17	0.543305	2.50565e-09
ENSMUSG00000029153	Ociad2	520.168	545.194	851.907	939.326	0.714086	2.61566e-09
ENSMUSG00000029910	Mad2l1	1244.42	1211.68	1838.71	1704.27	0.565701	2.63669e-09
ENSMUSG00000018417	Myo1b	693.459	1177.56	1151.12	1548.58	0.732037	2.65265e-09
ENSMUSG00000034329	Brip1	255.642	335.013	486.481	549.276	0.931186	2.77091e-09
ENSMUSG00000042256	Ptchd4	45.8161	136.476	100.67	166.256	1.15908	2.79522e-09
ENSMUSG00000093460	Six3os1	1079.19	1089.62	1673.94	1550.35	0.635547	2.90206e-09
ENSMUSG00000023805	Synj2	367.304	511.14	573.265	794.698	0.646264	2.93433e-09
ENSMUSG00000036825	Ssx2ip	726.627	648.169	1118.59	1021.89	0.623824	2.97565e-09
ENSMUSG00000026683	Nuf2	1767.66	1665.11	2878.36	2488.62	0.704814	3.39451e-09
ENSMUSG00000024795	Kif20b	969.854	960.805	1808.92	1596.2	0.900803	3.57358e-09
ENSMUSG00000022881	Rfc4	121.446	120.486	226.359	190.506	0.894788	3.64275e-09
ENSMUSG00000046179	E2f8	555.455	542.149	849.152	819.28	0.613895	3.7071e-09
ENSMUSG00000035049	Rrp12	235.322	229.452	392.974	435.806	0.741629	3.73826e-09
ENSMUSG00000072437	Nanos1	63.3554	84.9654	137.382	180.31	1.10868	3.75442e-09
ENSMUSG00000015656	Hspa8	27640.1	25034.4	39303.3	39774.9	0.509617	3.75708e-09
ENSMUSG00000027067	Ssrp1	3682.75	4216.88	5298.26	5795.65	0.526207	3.90745e-09
ENSMUSG00000057113	Npm1	5288.26	6640.75	8151.17	10467.4	0.625762	3.92608e-09
ENSMUSG00000002190	Clgn	63.3847	66.6513	125.282	126.937	0.975719	3.94598e-09
ENSMUSG00000021270	Hsp90aa1	11640.2	12689.9	18117.6	19196	0.640023	4.17018e-09
ENSMUSG00000031328	Flna	17363.2	17963.9	24777	25328	0.514615	4.2031e-09
ENSMUSG00000041959	S100a10	1144.05	1519.98	1882.72	2352.81	0.720076	4.30756e-09
ENSMUSG00000015112	Slc25a13	107.045	134.714	218.173	241.065	1.03127	4.34872e-09
ENSMUSG00000062248	Cks2	677.418	742.62	1120.31	1124.45	0.727277	4.35979e-09
ENSMUSG00000039385	Cdh6	366.001	437.445	572.748	681.915	0.647175	4.38484e-09
ENSMUSG00000031250	Tnmd	13.4868	12.7889	42.0543	23.917	1.6297	4.59977e-09
ENSMUSG00000021811	Dnajc9	1220.96	1353.65	1889.4	1869.46	0.630937	4.79368e-09
ENSMUSG00000031669	Gins3	104.706	141.344	200.14	197.545	0.944433	4.83561e-09
ENSMUSG00000027395	Polr1b	221.349	233.744	384.033	439.728	0.792416	4.86787e-09
ENSMUSG00000041406	BC055324	210.504	281.076	371.788	421.205	0.825498	5.28885e-09
ENSMUSG00000038482	Tfdp1	1680.21	1901.01	2587.28	2998.95	0.624595	5.50772e-09
ENSMUSG00000053716	Dusp7	442.796	452.635	746.181	695.995	0.755577	5.66971e-09
ENSMUSG00000050777	Tmem37	39.0145	49.4921	111.493	107.98	1.51137	5.83102e-09
ENSMUSG00000026999	Nup35	342.89	336.115	527.711	518.801	0.623672	5.87638e-09
ENSMUSG00000016487	Ppfibp1	1256	1557.98	1931.72	2264.59	0.622425	6.02604e-09
ENSMUSG00000024097	Srsf7	1156.48	1256.54	1707.35	2076.6	0.563941	6.03542e-09
ENSMUSG00000112980	CT030173.1	145.445	178.034	251.392	277.918	0.792634	6.15109e-09
ENSMUSG00000001020	S100a4	135.442	169.036	268.091	286.294	0.982976	6.58006e-09
ENSMUSG00000028381	Ugcg	742.189	1014.81	1136.17	1459.11	0.617854	6.67917e-09
ENSMUSG00000058914	C1qtnf3	15.0559	12.2691	44.3112	44.2468	1.56204	6.91556e-09
ENSMUSG00000039103	Nexn	477.006	521.191	826.046	705.512	0.795383	6.98482e-09
ENSMUSG00000042622	Maff	131.792	432.745	276.797	544.181	1.07326	7.18502e-09
ENSMUSG00000027454	Gins1	91.1955	81.5355	176.55	182.107	0.943509	7.25542e-09
ENSMUSG00000021391	Cenpp	101.651	101.843	182.198	135.907	0.837919	7.53946e-09
ENSMUSG00000038608	Dock10	294.861	615.623	469.533	573.259	0.670604	7.75561e-09
ENSMUSG00000048007	Timm8a1	356.698	403.161	569.355	585.271	0.676369	7.82182e-09
ENSMUSG00000063558	Aox1	232.411	339.438	402.025	451.194	0.794875	8.21813e-09
ENSMUSG00000037868	Egr2	68.0535	652.335	141.598	572.206	1.04566	8.31908e-09
ENSMUSG00000041734	Kirrel	1557.77	2290.73	2314.51	3109.89	0.572735	8.32547e-09
ENSMUSG00000030641	Ddias	380.566	557.976	621.842	700.792	0.712123	8.47788e-09
ENSMUSG00000063200	Nol7	738.401	759.486	1105.3	1100.75	0.581872	9.0541e-09
ENSMUSG00000022483	Col2a1	699.383	707.795	1063.94	857.407	0.606836	9.22513e-09
ENSMUSG00000001627	Ifrd1	506.005	887.519	806.258	1250.87	0.67584	9.30873e-09
ENSMUSG00000026274	Pask	393.257	485.46	621.08	658.468	0.659906	9.45896e-09
ENSMUSG00000022752	Tomm70a	1638.29	1794.97	2482.32	2843.05	0.601178	9.59545e-09
ENSMUSG00000047821	Trim16	58.6132	50.9858	115.773	92.8147	0.975583	9.99984e-09
ENSMUSG00000035283	Adrb1	243.433	206.401	446.606	484.199	0.880079	1.02452e-08
ENSMUSG00000029283	Cdc7	526.903	651.866	951.337	1003.64	0.854771	1.0352e-08
ENSMUSG00000004356	Utp20	1067.51	1250.72	1623.69	1957.87	0.607466	1.05962e-08
ENSMUSG00000027353	Mcm8	198.555	206.182	343.211	409.55	0.789801	1.06766e-08
ENSMUSG00000018446	C1qbp	1031.51	1206.63	1513.14	1787.5	0.554332	1.08179e-08
ENSMUSG00000025854	Fam20c	314.757	430.8	494.38	592.089	0.654182	1.20238e-08
ENSMUSG00000031709	Tbc1d9	266.683	341.992	425.838	500.4	0.674241	1.21195e-08
ENSMUSG00000034813	Grip1	461.551	496.559	696.616	604.358	0.596809	1.24679e-08
ENSMUSG00000028334	Nans	641.857	837.142	962.345	1092.93	0.584457	1.25109e-08
ENSMUSG00000029447	Cct6a	2938.41	3048.05	4576.94	4931.25	0.640884	1.28656e-08
ENSMUSG00000034906	Ncaph	1283.71	1462.14	1971.62	1917.81	0.620807	1.29272e-08
ENSMUSG00000027490	E2f1	470.802	673.813	747.15	923.266	0.669878	1.30885e-08
ENSMUSG00000030007	Cct7	3065.37	3424.43	4488.63	4937.88	0.551811	1.31737e-08
ENSMUSG00000022307	Oxr1	1997.94	2023.77	3087.98	2904.67	0.629796	1.34707e-08
ENSMUSG00000052033	Pfdn4	256.431	287.243	552.262	688.236	1.1058	1.4284e-08
ENSMUSG00000068184	Ndufaf2	198.497	202.125	343.889	309.327	0.786645	1.44263e-08
ENSMUSG00000031207	Msn	13439.6	18415.3	19023.9	24596	0.502893	1.45995e-08
ENSMUSG00000058258	Idi1	821.068	1654.25	1349.5	2313.73	0.718669	1.48187e-08
ENSMUSG00000024966	Stip1	3442.26	4119.3	4904.01	5702.24	0.512013	1.56721e-08
ENSMUSG00000026039	Sgo2a	1065.46	1271.39	1874.96	1943.41	0.816809	1.5737e-08
ENSMUSG00000069682	Gm10275	2492.3	2898.96	3627.39	4168.02	0.542798	1.5827e-08
ENSMUSG00000030717	Nupr1	290.406	1022.2	471.734	1457.24	0.696275	1.62949e-08
ENSMUSG00000038602	Slc35f1	1175.74	1305.72	1719.63	1692.2	0.551378	1.68643e-08
ENSMUSG00000021670	Hmgcr	1793.73	3003.67	2684.43	4036.76	0.583373	1.70572e-08
ENSMUSG00000054808	Actn4	5212.25	7130	7511.86	9247.59	0.528853	1.92701e-08
ENSMUSG00000020116	Pno1	391.373	421.831	649.123	720.824	0.730568	1.92708e-08
ENSMUSG00000005370	Msh6	1177.76	1710.48	1777.29	2081.7	0.595584	2.04564e-08
ENSMUSG00000030057	Cnbp	2554.97	2996.85	3681.3	4354.78	0.528667	2.08843e-08
ENSMUSG00000032261	Sh3bgrl2	225.724	305.708	360.185	505.607	0.675953	2.08972e-08
ENSMUSG00000038145	Snrk	796.798	896.761	1198.02	1094.69	0.589346	2.10543e-08
ENSMUSG00000024521	Pmaip1	301.507	499.882	601.776	755.36	0.998265	2.1413e-08
ENSMUSG00000005846	Rsl1d1	980.762	1110.45	1459.74	1779.02	0.574809	2.22689e-08
ENSMUSG00000038028	Tigar	185.575	167.076	299.726	350.177	0.693804	2.33015e-08
ENSMUSG00000037681	Esyt3	84.8417	115.214	162.336	189.908	0.939871	2.39747e-08
ENSMUSG00000090841	Myl6	5773.89	5801.77	8765.51	8732.94	0.60405	2.41453e-08
ENSMUSG00000025658	Cnksr2	50.7266	89.2662	102.214	135.075	1.02695	2.41923e-08
ENSMUSG00000039318	Rab3gap2	1355.61	1613.71	1950.64	2219.4	0.527206	2.46132e-08
ENSMUSG00000034311	Kif4	1332.59	1278.77	2174.25	2020.88	0.707907	2.50969e-08
ENSMUSG00000024436	Mrps18b	265.751	290.062	423.242	538.931	0.670057	2.51489e-08
ENSMUSG00000053930	Shisa6	619.83	1102.6	1000.84	1656.52	0.692509	2.70327e-08
ENSMUSG00000033998	Kcnk1	159.136	153.432	263.479	174.08	0.728633	2.73025e-08
ENSMUSG00000087060	Eldr	93.4469	75.3883	169.54	132.493	0.848634	2.76242e-08
ENSMUSG00000030521	Mphosph10	447.979	416.311	738.219	766.881	0.71999	2.77161e-08
ENSMUSG00000032423	Syncrip	4153.98	4558.65	6637.82	6413.21	0.677762	2.78226e-08
ENSMUSG00000061731	Ext1	1832.48	2247.5	2613.74	2943.03	0.514551	2.85021e-08
ENSMUSG00000027076	Timm10	127.247	133.705	228.554	225.966	0.842637	2.95491e-08
ENSMUSG00000034023	Fancd2	560.616	591.182	863.868	874.835	0.626691	2.96919e-08
ENSMUSG00000028792	Ak2	1755.44	2027.79	2544.57	2867.28	0.537139	3.03052e-08
ENSMUSG00000020914	Top2a	10071.5	11822.9	15377.7	15859	0.61227	3.09399e-08
ENSMUSG00000009566	Fpgs	269.183	292.929	431.781	484.654	0.682619	3.17149e-08
ENSMUSG00000028312	Smc2	2406.3	2539.27	4037.85	3835.11	0.74833	3.19446e-08
ENSMUSG00000023988	Bysl	339.81	373.864	540.387	669.692	0.671501	3.2848e-08
ENSMUSG00000040675	Mthfd1l	590.749	1041.35	875.219	1186.42	0.568676	3.64489e-08
ENSMUSG00000020897	Aurkb	814.84	985.307	1190.7	1361.65	0.549495	3.77322e-08
ENSMUSG00000020180	Snrpd3	1013.16	1067.43	1620.34	2077.61	0.677294	3.79935e-08
ENSMUSG00000072844	G530011O06Rik	110.819	190.471	194.449	231.563	0.822094	3.85711e-08
ENSMUSG00000032788	Pdxk	957.006	1068.04	1499.89	1436.77	0.649541	3.93629e-08
ENSMUSG00000074802	Gas2l3	1394.3	1730.2	2007.76	1928.14	0.527547	3.94933e-08
ENSMUSG00000028702	Rad54l	414.116	464.583	687.06	691.412	0.731564	4.50157e-08
ENSMUSG00000053886	Sh2d4a	8.62646	63.0496	35.3507	80.1697	1.98407	4.56761e-08
ENSMUSG00000028614	Ndc1	1125.22	1017.12	1629.47	1524.27	0.535082	4.62276e-08
ENSMUSG00000020092	Pald1	332.818	336.469	521.012	435.785	0.646583	4.63667e-08
ENSMUSG00000054720	Lrrc8c	1402.46	1733.92	2034.14	2531.72	0.537331	4.65369e-08
ENSMUSG00000016382	Pls3	2739.83	3030.62	4210.68	4403.24	0.621676	4.8459e-08
ENSMUSG00000008136	Fhl2	128.602	151.132	220.533	243.293	0.788438	4.84746e-08
ENSMUSG00000026234	Ncl	10129.6	11855.9	15479.4	19181.7	0.61345	4.9757e-08
ENSMUSG00000030677	Kif22	1312.89	1231.4	1889.65	1720.51	0.52619	5.0851e-08
ENSMUSG00000027293	Ehd4	175.166	308.307	288.839	575.328	0.728697	5.35253e-08
ENSMUSG00000090553	Snrpe	283.007	305.657	480.154	635.558	0.762686	5.37215e-08
ENSMUSG00000074182	Znhit6	231.474	236.568	367.955	381.469	0.665695	5.44289e-08
ENSMUSG00000046295	Ankle1	263.405	243.533	420.759	328.718	0.674739	5.68618e-08
ENSMUSG00000022156	Gzme	17.1309	25.9696	55.6455	104.211	1.68651	5.75946e-08
ENSMUSG00000021952	Xpo4	844.335	831.433	1293.88	1197.82	0.617454	5.8883e-08
ENSMUSG00000071172	Srsf3	2624.61	2236.65	3765.5	3662.28	0.522587	5.90189e-08
ENSMUSG00000039055	Eme1	154.172	149.176	251.473	291.468	0.709668	6.26505e-08
ENSMUSG00000017999	Ddx27	537.732	549.925	810.678	868.003	0.591842	6.55793e-08
ENSMUSG00000046432	Bex3	1457.83	1483.91	2143.88	2320.96	0.556804	6.55793e-08
ENSMUSG00000028937	Acot7	332.687	381.968	527.758	702.664	0.663536	6.56546e-08
ENSMUSG00000040990	Sh3kbp1	889.877	1170.23	1334.4	1765.67	0.584741	6.66378e-08
ENSMUSG00000028464	Tpm2	1356.89	1483.01	2201.56	2166.98	0.699167	6.74544e-08
ENSMUSG00000031671	Setd6	132.13	169.222	222.021	253.064	0.747702	6.78053e-08
ENSMUSG00000076441	Ass1	636.085	946.881	1012.65	1407.65	0.672006	7.00385e-08
ENSMUSG00000108414	Snhg1	316.08	358.01	491.517	625.941	0.639495	7.00956e-08
ENSMUSG00000046111	Cep295	1360.75	1563.09	2075.86	2061.31	0.611206	7.16231e-08
ENSMUSG00000040463	Mybbp1a	2071.06	2403.38	2928.44	3725.32	0.501157	7.19963e-08
ENSMUSG00000021149	Gtpbp4	751.093	798.566	1244.74	1475.51	0.730624	7.83748e-08
ENSMUSG00000027699	Ect2	1458.58	1429.2	2229.61	2032.32	0.614205	7.85885e-08
ENSMUSG00000026491	Ahctf1	1453.02	1697.56	2133.08	2348.39	0.555826	7.88072e-08
ENSMUSG00000026864	Hspa5	8169.2	8482.04	11990.7	12581.2	0.555303	7.88074e-08
ENSMUSG00000029363	Rfc5	364.228	441.175	575.734	629.967	0.663294	7.94102e-08
ENSMUSG00000025867	Cplx2	1017.32	867.58	1490.72	1321.64	0.552829	7.94102e-08
ENSMUSG00000021411	Pxdc1	651.375	801.166	983.628	1193.03	0.596064	8.00324e-08
ENSMUSG00000029378	Areg	5.07562	16.3452	22.5198	62.618	2.12508	8.24199e-08
ENSMUSG00000060950	Trmt61a	104.563	103.632	180.218	204.992	0.782109	8.24199e-08
ENSMUSG00000038244	Mical2	920.102	913.041	1343.9	1523.29	0.548715	8.3067e-08
ENSMUSG00000037370	Enpp1	517.764	484.268	770.558	728.448	0.575705	8.80389e-08
ENSMUSG00000031232	Magt1	1465.41	1488.23	2226.23	2022.07	0.605013	8.82647e-08
ENSMUSG00000050395	Tnfsf15	6.77022	34.5422	29.0894	80.9393	2.035	8.84339e-08
ENSMUSG00000090290	Tarbp1	177.406	186.842	285.007	275.671	0.682031	9.68275e-08
ENSMUSG00000028933	Xrcc2	289.298	230.459	468.499	339.758	0.702509	1.0032e-07
ENSMUSG00000031997	Trpc6	12.4806	20.8593	37.7527	83.3778	1.60289	1.05731e-07
ENSMUSG00000028664	Ephb2	2242.33	2510.69	3212.44	3192.12	0.520264	1.16377e-07
ENSMUSG00000049327	Kmt5a	1572.32	1791.59	2261.67	2385.72	0.52544	1.17819e-07
ENSMUSG00000003868	Ruvbl2	1247.84	1597.03	1841.47	2253.11	0.56272	1.22326e-07
ENSMUSG00000099871	Gm21742	23.1181	35.5281	58.9124	44.1541	1.34898	1.23392e-07
ENSMUSG00000021418	Rpp40	44.2306	46.4391	89.6571	91.4597	1.01155	1.24248e-07
ENSMUSG00000047879	Usp14	1156.02	1300.12	1732.04	1782.91	0.584835	1.24923e-07
ENSMUSG00000062937	Mtap	589.816	775.99	996.201	1381.89	0.758213	1.3259e-07
ENSMUSG00000079084	Ccdc82	466.328	490.18	750.994	657.507	0.689219	1.32997e-07
ENSMUSG00000027905	Ddx20	223.125	218.158	374.723	343.812	0.746867	1.34852e-07
ENSMUSG00000035958	Tdp2	598.483	635.736	906.864	770.146	0.599855	1.35034e-07
ENSMUSG00000004642	Slbp	618.639	719.271	993.005	1094.02	0.68431	1.39447e-07
ENSMUSG00000028873	Cdca8	1324.43	1221.84	1900.72	1724.83	0.522186	1.41127e-07
ENSMUSG00000022075	Rhobtb2	773.736	1001.58	1155.21	1339.72	0.580217	1.42796e-07
ENSMUSG00000020620	Abca8b	241.104	209.583	404.731	275.982	0.7501	1.44732e-07
ENSMUSG00000014226	Cacybp	1606.25	1377.52	2406.09	1903.12	0.584447	1.46517e-07
ENSMUSG00000038418	Egr1	726.389	2748.01	1142.68	3121.17	0.655296	1.51362e-07
ENSMUSG00000001440	Kpnb1	9380.22	10600.4	13266.9	13444.8	0.501728	1.56356e-07
ENSMUSG00000028851	Nudc	2105.65	2125.67	3139.73	3229.68	0.5772	1.5678e-07
ENSMUSG00000078941	Ak6	1103.35	1187.33	1611.14	1558.53	0.546467	1.57437e-07
ENSMUSG00000023984	Gm20517	42.8599	85.3933	100.135	100.697	1.23194	1.57579e-07
ENSMUSG00000078521	Aunip	37.4976	42.2794	78.0712	107.694	1.06486	1.58622e-07
ENSMUSG00000037628	Cdkn3	158.691	136.451	264.624	193.851	0.733414	1.5875e-07
ENSMUSG00000029552	Tes	486.458	494.453	722.172	832.424	0.571609	1.58845e-07
ENSMUSG00000025809	Itgb1	23116	25349.3	34621.1	34878.9	0.584301	1.59674e-07
ENSMUSG00000026134	Prim2	400.162	427.258	633.889	659.24	0.666368	1.61284e-07
ENSMUSG00000057497	Fam136a	384.386	424.288	570.05	597.173	0.567647	1.65021e-07
ENSMUSG00000022533	Atp13a3	2323.37	2643.57	3430.9	3360.76	0.563984	1.73546e-07
ENSMUSG00000024346	Pfdn1	948.811	926.526	1396.68	1427.81	0.559411	1.78628e-07
ENSMUSG00000062393	Dgkk	36.1253	50.9226	76.8012	96.7127	1.10527	1.828e-07
ENSMUSG00000048087	Gm4737	1152.01	1232.93	1668.28	1922.48	0.535027	1.8375e-07
ENSMUSG00000040084	Bub1b	2200.04	2124.65	3144.57	2708.49	0.516865	1.96345e-07
ENSMUSG00000022369	Mtbp	357.936	504.694	569.681	677.704	0.672392	1.99874e-07
ENSMUSG00000072082	Ccnf	895.039	986.069	1310.18	1246.53	0.55231	2.05189e-07
ENSMUSG00000030220	Arhgdib	114.417	249.991	190.269	445.289	0.730956	2.07931e-07
ENSMUSG00000022241	Tars	1045.6	1075.35	1501.27	1783.95	0.523105	2.20583e-07
ENSMUSG00000030671	Pde3b	714.509	1007.31	1068.98	1212.17	0.583773	2.27584e-07
ENSMUSG00000028678	Kif2c	1063.06	1023.95	1515.33	1420.16	0.512811	2.28486e-07
ENSMUSG00000038388	Mpp6	969.789	1286.87	1464.61	1729.07	0.597138	2.28682e-07
ENSMUSG00000031788	Kifc3	975.691	747.144	1450.65	1128.55	0.572753	2.28682e-07
ENSMUSG00000030888	Rrp8	354.048	399.671	527.14	639.733	0.577283	2.34789e-07
ENSMUSG00000042660	Wdr55	231.297	271.467	369.325	448.367	0.671261	2.39825e-07
ENSMUSG00000035310	Lin54	444.608	520.858	687.377	717.407	0.631524	2.47927e-07
ENSMUSG00000032369	Plscr1	172.643	180.354	275.816	332.872	0.678425	2.47927e-07
ENSMUSG00000045328	Cenpe	2577.89	2922.89	4127.97	4307.57	0.680809	2.50037e-07
ENSMUSG00000029821	Dfna5	207.817	244.641	325.694	291.9	0.644872	2.59393e-07
ENSMUSG00000061983	Rps12	126.172	142.784	213.093	225.654	0.755289	2.6164e-07
ENSMUSG00000053801	Grwd1	143.963	148.712	236.851	333.558	0.717948	2.64506e-07
ENSMUSG00000055491	Pprc1	627.345	905.059	974.749	1315.13	0.63722	2.65953e-07
ENSMUSG00000020900	Myh10	8972.16	9664.92	12879.2	12383.2	0.523142	2.70486e-07
ENSMUSG00000026784	Pdss1	119.955	126.476	201.88	251.446	0.758414	2.82114e-07
ENSMUSG00000042367	Gjb3	12.0963	45.6445	37.0472	117.422	1.56591	2.85767e-07
ENSMUSG00000035351	Nup37	155.072	183.097	267.188	258.471	0.787798	2.91424e-07
ENSMUSG00000028683	Eif2b3	194.691	165.038	302.762	322.802	0.637556	3.03775e-07
ENSMUSG00000031578	Mak16	559.238	675.719	884.405	1125.55	0.663433	3.04271e-07
ENSMUSG00000022385	Gtse1	873.684	1210.53	1314.78	1597.56	0.590617	3.08532e-07
ENSMUSG00000037846	Rtkn2	431.955	447.626	647.092	459.593	0.584794	3.15862e-07
ENSMUSG00000042406	Atf4	1672.4	2556.25	2413.66	3302.25	0.530641	3.21594e-07
ENSMUSG00000026281	Dtymk	656.931	689.61	996.74	1044.48	0.602323	3.27937e-07
ENSMUSG00000027009	Itga4	141.996	228.588	260.795	340.2	0.885188	3.34202e-07
ENSMUSG00000018848	Rars	1021.86	1154.8	1564.22	1907.08	0.6157	3.34202e-07
ENSMUSG00000025995	Wdr75	554.242	640.857	811.742	1032.4	0.553296	3.49013e-07
ENSMUSG00000028655	Mfsd2a	1303.42	923.008	1909.3	1410.79	0.552747	3.50409e-07
ENSMUSG00000026434	Nucks1	4399.42	4605.02	6457.34	6005.32	0.555252	3.52699e-07
ENSMUSG00000038975	Rabggtb	645.423	700.029	953.093	984.87	0.563416	3.72846e-07
ENSMUSG00000023942	Slc29a1	585.685	828.459	943.389	1176.57	0.688459	3.77988e-07
ENSMUSG00000024999	Noc3l	357.316	353.26	541.516	583.282	0.599475	3.92417e-07
ENSMUSG00000024542	Cep192	1360.18	1505.32	1957.39	2141.66	0.52723	3.99545e-07
ENSMUSG00000071415	Rpl23	5934.61	6647.58	8566.83	10464.7	0.531339	3.99851e-07
ENSMUSG00000098090	2700099C18Rik	195.042	216.808	334.31	298.89	0.776076	4.07251e-07
ENSMUSG00000031843	Mphosph6	523.61	658.721	781.606	887.019	0.579056	4.1596e-07
ENSMUSG00000057315	Arhgap24	88.3935	137.803	150.974	165.461	0.781343	4.20407e-07
ENSMUSG00000056209	Npm3	437.725	499.75	718.076	808.255	0.715843	4.22807e-07
ENSMUSG00000020328	Nudcd2	766.629	873.375	1111.84	1170.52	0.537689	4.23964e-07
ENSMUSG00000049097	Ankrd34a	47.5854	62.695	101.222	110.76	1.06512	4.39109e-07
ENSMUSG00000057561	Eif1a	683.244	965.164	1021.86	1333.04	0.583798	4.393e-07
ENSMUSG00000029790	Cep41	338.576	260.271	496.374	415.013	0.555042	4.44849e-07
ENSMUSG00000097479	Gm26582	27.3954	39.9578	72.144	55.3142	1.36661	4.51461e-07
ENSMUSG00000024498	Tcerg1	1407.71	1637.69	1991.46	2051.36	0.501822	4.56075e-07
ENSMUSG00000023868	Pde10a	339.836	459.489	512.094	602.498	0.596548	4.57924e-07
ENSMUSG00000097195	Snhg5	225.482	295.22	392.163	466.974	0.802273	4.6206e-07
ENSMUSG00000015880	Ncapg	993.216	1034.79	1611.03	1387.09	0.699117	4.87372e-07
ENSMUSG00000038296	Galnt18	162.619	429.35	278.651	496.43	0.77482	4.89487e-07
ENSMUSG00000019773	Fbxo5	318.333	330.194	573.571	608.029	0.849093	4.92887e-07
ENSMUSG00000000628	Hk2	1641.79	3584.58	2355.49	3981.39	0.522796	4.96192e-07
ENSMUSG00000022833	Ccdc14	218.895	245.613	334.265	307.098	0.615757	5.00341e-07
ENSMUSG00000030264	Thumpd3	400.985	412.305	686.28	689.778	0.774914	5.35087e-07
ENSMUSG00000024360	Etf1	2287.75	2511.97	3345.97	3608.95	0.549818	5.39596e-07
ENSMUSG00000026283	Ing5	220.532	270.99	353.389	394.666	0.685455	5.54395e-07
ENSMUSG00000038299	Wdr36	499.068	625.815	719.588	1076.27	0.528464	5.54395e-07
ENSMUSG00000031790	Mmp15	2568.57	2314.66	4044.46	2804.79	0.656692	5.87374e-07
ENSMUSG00000024222	Fkbp5	1187.23	1245.72	1677.35	1513.18	0.500047	5.92351e-07
ENSMUSG00000022471	Xrcc6	675.836	728.714	1028.85	1174.38	0.607811	5.99711e-07
ENSMUSG00000091387	Gcnt4	388.011	403.517	564.325	548.495	0.541419	6.01846e-07
ENSMUSG00000027562	Car2	872.606	796.675	1260.58	1095.57	0.53138	6.03567e-07
ENSMUSG00000030218	Mgp	339.648	531.203	550.472	954.947	0.694414	6.12424e-07
ENSMUSG00000025980	Hspd1	6110.98	6848.18	9842.68	10973.8	0.689284	6.29551e-07
ENSMUSG00000031523	Dlc1	431.16	863.84	644.598	1293.07	0.582644	6.59851e-07
ENSMUSG00000019814	Ltv1	346.017	313.346	520.17	668.919	0.587862	6.60573e-07
ENSMUSG00000046434	Hnrnpa1	12843.1	14738.5	18298.5	20132.6	0.512366	6.63233e-07
ENSMUSG00000020048	Hsp90b1	16836.7	19086.4	24812.2	23674.9	0.561101	6.81364e-07
ENSMUSG00000053219	Raet1e	45.8378	61.4327	111.516	149.93	1.29863	6.81791e-07
ENSMUSG00000001517	Foxm1	1734.4	1715.7	2483	2462.88	0.519388	6.97976e-07
ENSMUSG00000026029	Casp8	334.085	744.977	521.679	989.714	0.643896	7.01237e-07
ENSMUSG00000024376	Epb41l4a	688.483	605.965	976.425	833.955	0.505045	7.08316e-07
ENSMUSG00000021485	Mxd3	204.383	203.34	345.399	290.214	0.756773	7.28084e-07
ENSMUSG00000038644	Pold1	930.328	1230.09	1416.45	1544.81	0.60825	7.64496e-07
ENSMUSG00000032586	Traip	195.235	208.86	313.13	317.873	0.676727	7.64496e-07
ENSMUSG00000039208	Metrnl	218.049	293.399	339.275	344.414	0.642175	7.77325e-07
ENSMUSG00000027331	Knstrn	2163.3	2053.47	3103.65	2613.44	0.522043	7.8553e-07
ENSMUSG00000040659	Efhd2	541.748	976.464	839.435	1532.82	0.633882	7.85848e-07
ENSMUSG00000024151	Msh2	658.66	751.232	987.761	968.376	0.58445	8.15271e-07
ENSMUSG00000012483	Rpa3	177.917	179.397	307.646	312.651	0.785289	8.28854e-07
ENSMUSG00000021930	Spryd7	123.821	149.778	212.957	204.628	0.771484	8.28854e-07
ENSMUSG00000024349	Tmem173	39.4116	76.869	81.6763	116.907	1.04442	8.28854e-07
ENSMUSG00000079553	Kifc1	969.888	1201.32	1377.95	1266.55	0.508072	8.3482e-07
ENSMUSG00000032372	Plscr2	164.383	271.008	263.109	428.024	0.679048	8.4325e-07
ENSMUSG00000031928	Mre11a	488.809	630.708	732.596	959.357	0.585252	8.56796e-07
ENSMUSG00000026603	Smyd2	455.987	574.239	679.218	793.949	0.576168	8.619e-07
ENSMUSG00000030224	Strap	2121.31	2042.02	2999.87	2792.13	0.501334	8.76975e-07
ENSMUSG00000070476	Fam217b	193.989	251.291	299.456	264.457	0.629301	8.86648e-07
ENSMUSG00000035873	Pawr	400.236	483.557	584.542	729.505	0.548215	8.86879e-07
ENSMUSG00000020032	Nuak1	1279.21	1597.48	1843.39	2200.88	0.52899	8.98263e-07
ENSMUSG00000012443	Kif11	2300.26	2178.65	3448.32	2789.97	0.585656	9.10826e-07
ENSMUSG00000097108	Gm26581	18.7376	19.533	100.721	104.65	2.42288	9.56877e-07
ENSMUSG00000030942	Thumpd1	522.209	544.209	787.766	795.837	0.596023	9.63836e-07
ENSMUSG00000024007	Ppil1	400.083	371.806	581.847	595.752	0.543189	9.67106e-07
ENSMUSG00000021965	Ska3	367.842	333.672	535.147	498.667	0.541034	9.70954e-07
ENSMUSG00000022157	Mcpt8	11.6147	18.6705	33.8892	41.2736	1.54269	9.8345e-07
ENSMUSG00000034486	Gbx2	160.258	292.744	260.62	394.099	0.70058	1.03319e-06
ENSMUSG00000024056	Ndc80	496.675	464.208	839.267	768.345	0.758413	1.03529e-06
ENSMUSG00000068270	Shroom4	362.272	490.947	532.806	700.616	0.558556	1.04762e-06
ENSMUSG00000085399	Foxd2os	22.7683	26.4597	56.6853	47.2445	1.27784	1.11193e-06
ENSMUSG00000024791	Cdca5	202.253	236.292	308.554	341.93	0.60839	1.11372e-06
ENSMUSG00000030079	Ruvbl1	652.191	627.476	977.371	1093.71	0.584414	1.11803e-06
ENSMUSG00000051235	Gen1	281.111	256.092	453.416	436.497	0.695398	1.13893e-06
ENSMUSG00000022177	Haus4	221.044	249.877	343.173	381.235	0.632858	1.14453e-06
ENSMUSG00000087651	1500009L16Rik	246.892	345.134	380.876	387.913	0.626717	1.16082e-06
ENSMUSG00000050107	Haspin	133.072	143.321	223.109	187.492	0.749812	1.17127e-06
ENSMUSG00000053199	Arhgap20	134.53	113.281	222.42	261.387	0.733988	1.1949e-06
ENSMUSG00000005124	Wisp1	537.397	711.414	816.377	995.457	0.604619	1.23048e-06
ENSMUSG00000045690	Wdr89	80.1885	107.176	138.731	138.571	0.786664	1.24762e-06
ENSMUSG00000035378	Shq1	53.4897	58.1864	99.2102	105.092	0.888462	1.24922e-06
ENSMUSG00000047496	Rnf152	193.806	348.604	308.184	323.061	0.678921	1.30526e-06
ENSMUSG00000020181	Nav3	366.452	513.452	546.494	807.304	0.580019	1.31168e-06
ENSMUSG00000092545	Gm20319	1.42384	0.906004	12.144	2.79952	3.07617	1.32541e-06
ENSMUSG00000031821	Gins2	513.255	520.215	827.131	760.619	0.687796	1.3634e-06
ENSMUSG00000032744	Heyl	60.8641	44.5129	114.962	115.07	0.9175	1.36819e-06
ENSMUSG00000030619	Eed	474.926	586.147	690.192	832.966	0.540847	1.4069e-06
ENSMUSG00000023004	Tuba1b	11957.9	15926.7	18869.3	22387.4	0.659826	1.4202e-06
ENSMUSG00000028044	Cks1b	313.952	356.004	505.079	615.136	0.687875	1.44089e-06
ENSMUSG00000035431	Sstr1	4.84832	8.70172	30.3736	25.6964	2.61488	1.44425e-06
ENSMUSG00000028111	Ctsk	184.892	305.593	294.574	418.805	0.674475	1.45213e-06
ENSMUSG00000073705	Apitd1	69.7794	68.1673	136.345	129.159	0.962306	1.45465e-06
ENSMUSG00000018899	Irf1	240.248	2283.24	360.217	2323.44	0.585028	1.47566e-06
ENSMUSG00000041459	Tardbp	4083.24	4191.02	6017.08	5871.99	0.561011	1.49526e-06
ENSMUSG00000075266	Cenpw	97.2373	132.664	232.01	334.042	1.25398	1.51753e-06
ENSMUSG00000032815	Fanca	392.587	365.872	574.682	589.673	0.550289	1.52232e-06
ENSMUSG00000092060	Bend4	255.088	385.674	390.464	528.325	0.618285	1.58657e-06
ENSMUSG00000055214	Pld5	26.7053	46.4929	59.2259	95.3642	1.12834	1.62546e-06
ENSMUSG00000029648	Flt1	356.49	937.097	522.23	1072.72	0.554338	1.68326e-06
ENSMUSG00000048327	Ckap2l	2101.98	1984.04	3036.32	2697.39	0.53226	1.68728e-06
ENSMUSG00000029687	Ezh2	1612.17	1590.14	2330.73	1990.67	0.533845	1.70301e-06
ENSMUSG00000030468	Siglecg	19.6871	24.967	45.8694	41.4007	1.2132	1.75394e-06
ENSMUSG00000028066	Pmf1	462.709	496.587	704.171	783.769	0.602951	1.79154e-06
ENSMUSG00000019966	Kitl	1902.25	1478.6	2928.02	2337.81	0.623945	1.79956e-06
ENSMUSG00000030243	Recql	455.702	448.103	706.462	618.27	0.635212	1.85905e-06
ENSMUSG00000039396	Neil3	494.134	529.598	744.936	643.739	0.594699	1.87361e-06
ENSMUSG00000022234	Cct5	3297.21	3611.63	4717.82	5477.68	0.518354	1.94295e-06
ENSMUSG00000020380	Rad50	755.092	874.209	1173.87	1194.9	0.63778	1.96008e-06
ENSMUSG00000069045	Ddx3y	762.745	773.512	1272.66	1307.51	0.740175	2.00016e-06
ENSMUSG00000013415	Igf2bp1	140.712	188.223	228.969	310.62	0.706932	2.0142e-06
ENSMUSG00000050244	Heatr1	524.698	527.056	771.536	1045.79	0.557255	2.03996e-06
ENSMUSG00000026068	Il18rap	4.2387	15.3899	18.3335	38.5243	2.0701	2.1231e-06
ENSMUSG00000033706	Smyd5	350.562	419.378	510.696	703.379	0.545803	2.15966e-06
ENSMUSG00000043531	Sorcs1	1725.84	2262.39	2438.44	2520.57	0.50018	2.17916e-06
ENSMUSG00000019894	Slc6a15	211.698	268.006	325.122	391.558	0.620419	2.19096e-06
ENSMUSG00000031403	Dkc1	471.789	549.77	801.356	1034.25	0.766622	2.22654e-06
ENSMUSG00000000776	Polr3d	344.066	392.536	497.323	562.594	0.534113	2.22671e-06
ENSMUSG00000041147	Brca2	536.323	585.057	870.679	861.872	0.700944	2.23792e-06
ENSMUSG00000071072	Ptges3	3366.42	3894	4816.05	5052	0.518238	2.28436e-06
ENSMUSG00000031756	Cenpn	395.002	385.353	578.458	528.333	0.554827	2.41812e-06
ENSMUSG00000034912	Mdga2	555.27	606.808	814.146	648.994	0.555052	2.41812e-06
ENSMUSG00000113149	AC099934.3	122.962	169.811	220.493	246.26	0.843446	2.44468e-06
ENSMUSG00000061458	Nol10	348.637	326.617	510.444	577.905	0.547574	2.4814e-06
ENSMUSG00000063480	Snu13	943.236	1011.44	1350.08	1612.49	0.518641	2.49269e-06
ENSMUSG00000022142	Nup155	903.041	942.419	1331.6	1461.91	0.562093	2.52133e-06
ENSMUSG00000056124	B4galt6	931.081	918.294	1318.7	1337.31	0.503654	2.55659e-06
ENSMUSG00000036036	Zfp57	154.821	213.856	244.562	311.134	0.668051	2.56076e-06
ENSMUSG00000018983	E2f2	173.745	179.73	266.439	206.683	0.625269	2.57028e-06
ENSMUSG00000109324	Prmt1	1401.78	1712.36	2057.87	2649.38	0.555179	2.58806e-06
ENSMUSG00000020808	Pimreg	658.112	652.8	1004.14	1052.74	0.609621	2.63234e-06
ENSMUSG00000027242	Wdr76	331.827	426.254	510.917	620.014	0.625644	2.63604e-06
ENSMUSG00000031629	Cenpu	99.7577	88.35	173.738	207.559	0.801895	2.66277e-06
ENSMUSG00000068882	Ssb	3289.28	3551.6	4687.15	4912.65	0.512588	2.6675e-06
ENSMUSG00000027035	Cers6	531.483	1320.05	751.906	1522.67	0.50256	2.67155e-06
ENSMUSG00000027520	Zdbf2	217.397	226.753	343.274	330.235	0.662531	2.69834e-06
ENSMUSG00000050555	Hyls1	459.38	532.749	670.83	655.794	0.546871	2.77879e-06
ENSMUSG00000043998	Mgat2	836.47	912.115	1188.38	1152.77	0.506275	2.79081e-06
ENSMUSG00000067931	Zfp948	271.646	327.711	426.355	451.939	0.648359	2.80021e-06
ENSMUSG00000033762	Recql4	127.906	122.795	211.015	207.358	0.713434	2.81621e-06
ENSMUSG00000027722	Spata5	157.801	208.494	269.744	375.104	0.775252	2.91949e-06
ENSMUSG00000026245	Farsb	610.837	667.125	869.517	964.543	0.508364	2.9246e-06
ENSMUSG00000007122	Casq1	311.448	340.556	467.706	577.093	0.591158	2.9598e-06
ENSMUSG00000031683	Lsm6	808.105	794.618	1195.71	1139.24	0.566787	3.00513e-06
ENSMUSG00000034327	Kctd9	260.283	362.018	397.698	359.815	0.614008	3.05512e-06
ENSMUSG00000042680	Garem1	431.124	412.665	627.385	683.606	0.542445	3.07273e-06
ENSMUSG00000002297	Dbf4	834.829	892.663	1304.6	1363.91	0.645525	3.09857e-06
ENSMUSG00000031684	Slc10a7	275.359	324.09	399.704	494.899	0.54037	3.12517e-06
ENSMUSG00000028018	Gstcd	447.697	532.104	697.746	791.946	0.642993	3.21499e-06
ENSMUSG00000026617	Bpnt1	701.696	669.061	1001.81	1115.29	0.514285	3.32369e-06
ENSMUSG00000057346	Apol9a	0.836919	157.989	10.4334	249.603	3.38845	3.48053e-06
ENSMUSG00000007833	Aldh16a1	299.085	312.037	441.675	392.669	0.559935	3.51792e-06
ENSMUSG00000024312	Wdr46	366.678	368.446	548.818	636.289	0.577503	3.60632e-06
ENSMUSG00000048316	Gm9823	0	5.46017	12.8605	5.03914	7.0261	3.66126e-06
ENSMUSG00000054408	Spcs3	1642.53	1914.75	2326.22	2550.24	0.503581	3.69293e-06
ENSMUSG00000070526	Peg12	197.718	191.992	298.605	334.343	0.59788	3.69383e-06
ENSMUSG00000033952	Aspm	3833.09	3917.97	5638.98	5226.01	0.55858	3.76008e-06
ENSMUSG00000036499	Eea1	1109.89	1500.53	1644.41	2108.49	0.568582	3.7908e-06
ENSMUSG00000031584	Gsr	1014.24	1423.41	1444.6	1726.58	0.51198	3.84228e-06
ENSMUSG00000027404	Snrpb	1084.79	1235.35	1587.71	1888.4	0.550683	3.90327e-06
ENSMUSG00000039630	Hnrnpu	13327.2	13848.3	19467.1	19473.7	0.548373	3.96157e-06
ENSMUSG00000020392	Cdkn2aipnl	407.072	437.932	612.151	651.283	0.587629	3.97455e-06
ENSMUSG00000018189	Uchl5	490.816	504.101	750.48	782.087	0.614494	4.10836e-06
ENSMUSG00000023940	Sgo1	397.86	422.339	687.819	608.593	0.791812	4.16396e-06
ENSMUSG00000026605	Cenpf	6407.73	5888.18	9900.41	7677.49	0.62921	4.19236e-06
ENSMUSG00000044155	Lsm8	234.929	244.273	422.838	523.457	0.848682	4.21109e-06
ENSMUSG00000051236	Msrb3	981.336	1046.83	1472.36	1306.03	0.58725	4.22591e-06
ENSMUSG00000006412	Pfdn2	533.91	616.593	776.496	982.611	0.540677	4.29581e-06
ENSMUSG00000025190	Got1	481.073	587.485	687.349	820.232	0.518944	4.34449e-06
ENSMUSG00000064326	Siva1	216.103	301.383	326.628	457.623	0.596308	4.38534e-06
ENSMUSG00000037466	4930427A07Rik	201.664	171.508	306.946	274.203	0.607884	4.38534e-06
ENSMUSG00000037892	Pcdh18	373.289	401.459	539.485	615.897	0.529581	4.47288e-06
ENSMUSG00000062210	Tnfaip8	665.99	1345.08	944.85	1626.98	0.505663	4.53613e-06
ENSMUSG00000041741	Pde3a	534.627	635.006	783.171	805.677	0.553245	4.56716e-06
ENSMUSG00000046546	Fam43a	113.547	144.856	184.001	251.423	0.690816	4.59e-06
ENSMUSG00000037613	Tnfrsf23	146.754	192.261	226.417	257.753	0.624041	4.76874e-06
ENSMUSG00000025785	Exosc7	192.529	202.554	291.553	320.943	0.595866	4.87017e-06
ENSMUSG00000100807	Gm29521	19.2943	18.7067	46.9067	43.8972	1.2821	4.99193e-06
ENSMUSG00000024145	Pigf	235.137	209.265	349.342	349.618	0.578491	4.99486e-06
ENSMUSG00000061048	Cdh3	34.0794	34.0028	67.8889	64.676	0.983678	5.00666e-06
ENSMUSG00000026377	Nifk	436.253	428.559	624.618	699.123	0.517306	5.01544e-06
ENSMUSG00000023106	Denr	642.953	643.971	1053.07	1004.72	0.712706	5.02243e-06
ENSMUSG00000060098	Prmt7	489.518	505.113	695.442	829.986	0.510384	5.08569e-06
ENSMUSG00000006442	Srm	571.679	689.302	830.386	1123.93	0.539413	5.10565e-06
ENSMUSG00000091625	Lsm5	223.447	208.981	369.236	412.651	0.723262	5.1074e-06
ENSMUSG00000046794	Ppp1r3b	202.625	353.999	308.992	365.302	0.60618	5.14112e-06
ENSMUSG00000010311	Optc	24.0497	25.847	52.7414	34.0171	1.12842	5.25055e-06
ENSMUSG00000013629	Cad	1594.17	2109.66	2273.23	2803.99	0.513327	5.31869e-06
ENSMUSG00000031976	Urb2	292.654	297.317	434.978	537.975	0.572034	5.44851e-06
ENSMUSG00000054871	Tmem158	170.571	160.469	304.499	266.472	0.837041	5.52487e-06
ENSMUSG00000003283	Hck	29.8156	56.0338	60.8488	74.5551	1.02082	5.56423e-06
ENSMUSG00000037405	Icam1	81.8145	1651.82	146.963	1310.58	0.83205	5.59788e-06
ENSMUSG00000062991	Nrg1	248.017	705.076	362.447	852.577	0.547538	5.65024e-06
ENSMUSG00000037601	Nme1	486.463	504.57	803.073	776.44	0.724362	5.69126e-06
ENSMUSG00000025402	Nab2	909.443	1351.19	1332.07	1838.71	0.551711	5.87384e-06
ENSMUSG00000024883	Rin1	154.797	162.083	273.639	335.322	0.828772	5.87438e-06
ENSMUSG00000094248	Hist1h2ao	1.641	2.26407	36.5203	17.4995	4.38579	5.9198e-06
ENSMUSG00000034203	Chchd4	168.045	182.789	254.58	262.955	0.596415	5.98492e-06
ENSMUSG00000004880	Lbr	590.151	862.385	881.748	1198.58	0.580636	6.08123e-06
ENSMUSG00000007029	Vars	1729.88	2761.93	2494.79	3795.35	0.52998	6.12947e-06
ENSMUSG00000055184	Fam72a	49.017	48.2084	92.4763	104.084	0.897508	6.25462e-06
ENSMUSG00000020648	Dus4l	96.2473	109.55	160.506	187.003	0.724718	6.28884e-06
ENSMUSG00000027220	Syt13	14.3035	43.6496	37.6076	75.1616	1.37591	6.31506e-06
ENSMUSG00000030042	Pole4	258.992	291.142	397.83	400.097	0.61528	6.34855e-06
ENSMUSG00000090958	Lrrc32	323.485	665.452	488.406	835.162	0.598067	6.35901e-06
ENSMUSG00000032462	Pik3cb	362.844	481.448	543.352	664.145	0.589048	6.37728e-06
ENSMUSG00000057123	Gja5	15.5681	38.6434	38.9631	65.4049	1.32615	6.57916e-06
ENSMUSG00000032400	Zwilch	840.597	886.514	1328.59	1338.15	0.662073	6.64632e-06
ENSMUSG00000028896	Rcc1	494.253	540.703	701.822	829.535	0.509117	6.65813e-06
ENSMUSG00000001785	Pwp1	446.524	451.795	655.308	726.845	0.550889	6.65813e-06
ENSMUSG00000034349	Smc4	4021.63	4347.72	5989.1	5817.06	0.576207	6.66255e-06
ENSMUSG00000020583	Matn3	56.3191	52.2519	99.595	86.953	0.814802	6.68592e-06
ENSMUSG00000051329	Nup160	863.776	960.16	1307.56	1364.22	0.599699	6.7785e-06
ENSMUSG00000027208	Fgf7	28.9169	90.0923	58.5413	176.63	1.02678	6.78009e-06
ENSMUSG00000040133	Gpr176	91.6013	156.968	157.625	236.967	0.795803	6.82022e-06
ENSMUSG00000031353	Rbbp7	3027.49	3254.24	4300.23	4536.45	0.507925	6.8261e-06
ENSMUSG00000038943	Prc1	3990.76	3457.79	5674.69	4271.72	0.509537	6.85427e-06
ENSMUSG00000072980	Oip5	114.25	126.803	189.694	202.914	0.73097	7.28462e-06
ENSMUSG00000027099	Mtx2	317.306	305.604	460.972	489.889	0.544911	7.30122e-06
ENSMUSG00000031262	Cenpi	424.347	461.36	676.404	682.452	0.675755	7.43769e-06
ENSMUSG00000020303	Stc2	353.203	836.988	545.192	858.39	0.627179	7.51959e-06
ENSMUSG00000027959	Sass6	328.03	308.929	465.299	496.146	0.505352	7.61466e-06
ENSMUSG00000037544	Dlgap5	1064.88	1102.42	1551.99	1465.77	0.545139	7.62987e-06
ENSMUSG00000029334	Prkg2	19.1248	24.0415	45.2609	57.2355	1.2719	7.64048e-06
ENSMUSG00000020361	Hspa4	5038.65	4841.71	7171.15	7212.33	0.510721	7.87763e-06
ENSMUSG00000041219	Arhgap11a	2144.43	2086.53	3102.28	2789	0.534384	8.01854e-06
ENSMUSG00000036223	Ska1	220.275	193.643	349.728	295.268	0.667292	8.47493e-06
ENSMUSG00000032035	Ets1	387.84	1108	564.065	1112.38	0.544043	8.50187e-06
ENSMUSG00000053604	Rpia	105.592	160.692	173.63	181.141	0.720656	9.3502e-06
ENSMUSG00000026980	Ly75	80.4948	138.275	148.027	232.764	0.878858	9.35535e-06
ENSMUSG00000047044	D030056L22Rik	410.398	461.492	586.292	524.009	0.520743	9.65065e-06
ENSMUSG00000022723	Crybg3_1	202.868	271.481	318.224	310.009	0.653117	9.65848e-06
ENSMUSG00000042719	Naa25	595.793	673.659	865.933	1051.89	0.541175	9.72805e-06
ENSMUSG00000059208	Hnrnpm	3553.82	3131.93	5112.53	4792.45	0.52616	9.83481e-06
ENSMUSG00000024991	Eif3a	6405.09	6747.86	9245.15	9709.35	0.531051	9.88664e-06
ENSMUSG00000068798	Rap1a	1126.83	1147.52	1609.5	1514.27	0.514749	9.98577e-06
ENSMUSG00000061979	Rcc1l	209.207	235.347	342.064	378.175	0.707019	9.98882e-06
ENSMUSG00000025287	Acot9	155.031	227.043	233.287	309.612	0.594068	1.00452e-05
ENSMUSG00000044522	A730020M07Rik	91.7646	72.7688	152.878	132.066	0.74737	1.02162e-05
ENSMUSG00000028370	Pappa	204.366	435.847	307.997	453.68	0.594894	1.02513e-05
ENSMUSG00000085982	9530051G07Rik	28.2763	42.8708	61.3074	56.2705	1.11565	1.03909e-05
ENSMUSG00000042541	Sem1	1192.81	1254.48	1709.07	1648.02	0.519801	1.04489e-05
ENSMUSG00000038005	Hpf1	505.228	527.735	830.015	831.668	0.717029	1.05272e-05
ENSMUSG00000015961	Adss	1247.17	1391.79	1829.59	2170.51	0.554112	1.05666e-05
ENSMUSG00000028156	Eif4e	2037.18	2152.26	2899.79	3035.8	0.511151	1.06317e-05
ENSMUSG00000026536	Ifi211	22.7554	397.812	63.8988	706.93	1.50642	1.09321e-05
ENSMUSG00000036197	Gxylt1	1049.86	1043.84	1519.13	1371.47	0.535348	1.1323e-05
ENSMUSG00000025665	Rps6ka6	212.619	200.358	314.594	321.682	0.569045	1.16252e-05
ENSMUSG00000032502	Stac	21.4498	41.8757	52.8494	87.0697	1.29667	1.17432e-05
ENSMUSG00000020357	Flt4	16.0314	64.6231	43.3155	85.2832	1.43133	1.18358e-05
ENSMUSG00000028970	Abcb1b	218.889	465.467	330.541	601.319	0.605035	1.18479e-05
ENSMUSG00000039831	Arhgap29	1113.19	1702.23	1634.44	2534.17	0.555503	1.18586e-05
ENSMUSG00000020689	Itgb3	157.526	255.448	275.237	405.609	0.813068	1.20069e-05
ENSMUSG00000020272	Stk10	171.997	198.398	269.089	253.97	0.648953	1.21171e-05
ENSMUSG00000097772	5430416N02Rik	137.284	164.783	210.158	272.092	0.615438	1.25699e-05
ENSMUSG00000113786	AC099934.7	67.9272	82.9104	127.608	147.217	0.899483	1.27597e-05
ENSMUSG00000033216	Eefsec	194.625	203.619	287.081	324.551	0.558668	1.27938e-05
ENSMUSG00000025856	Pdgfa	356.904	591.319	553.1	888.065	0.636282	1.31349e-05
ENSMUSG00000068039	Tcp1	3747.29	4368.95	5308.04	6504.12	0.503881	1.41156e-05
ENSMUSG00000036202	Rif1	1114.28	1570.72	1709.43	2138.62	0.61883	1.45105e-05
ENSMUSG00000016520	Lnx2	308.907	416.715	441.679	467.99	0.513031	1.46097e-05
ENSMUSG00000010048	Ifrd2	177.976	256.187	275.966	374.781	0.6331	1.47416e-05
ENSMUSG00000021448	Shc3	531.146	585.702	776.494	689.738	0.547827	1.48267e-05
ENSMUSG00000025626	Phf6	1081.98	1202.88	1589.32	1555.28	0.555658	1.55261e-05
ENSMUSG00000010067	Rassf1	369.015	637.017	523.02	747.521	0.504464	1.55715e-05
ENSMUSG00000032290	Ptpn9	978.08	1086.31	1407.97	1416.8	0.527554	1.59007e-05
ENSMUSG00000018379	Srsf1	4927.4	5175.77	7303.82	7108.27	0.569475	1.63904e-05
ENSMUSG00000039985	Fam60a	359.617	597.077	551.157	980.88	0.619429	1.6628e-05
ENSMUSG00000035726	Supt16	3039.81	3373.5	4429.86	4781.18	0.54501	1.72615e-05
ENSMUSG00000032040	Dcps	383.471	400.891	542.902	517.449	0.501281	1.75761e-05
ENSMUSG00000021597	Slf1	206.728	232.108	326.274	341.214	0.659809	1.83012e-05
ENSMUSG00000036943	Rab8b	1474.41	1789.01	2198.56	2230	0.577842	1.86494e-05
ENSMUSG00000003355	Fkbp11	60.5723	91.1107	109.985	139.887	0.852133	1.86577e-05
ENSMUSG00000069565	Dazap1	1228.9	1330.88	1847.36	1843.81	0.589308	1.89204e-05
ENSMUSG00000019850	Tnfaip3	120.893	1011.55	192.065	995.898	0.668032	1.89289e-05
ENSMUSG00000029554	Mad1l1	383.266	332.483	557.269	518.199	0.538829	1.97323e-05
ENSMUSG00000019992	Mtfr2	110.858	121.003	174.801	150.37	0.650318	1.9949e-05
ENSMUSG00000067219	Nipal1	13.2967	35.5894	34.6822	66.413	1.41892	2.00103e-05
ENSMUSG00000051726	Kcnf1	23.725	137.958	56.9533	149.912	1.26702	2.01873e-05
ENSMUSG00000037894	H2afz	2525.33	3249.46	4039.11	4685.9	0.679338	2.09211e-05
ENSMUSG00000032373	Car12	124.191	374.803	197.249	368.988	0.667966	2.09559e-05
ENSMUSG00000035109	Shc4	203.738	192.959	310.716	282.522	0.619599	2.19374e-05
ENSMUSG00000032714	Syde1	422.856	583.906	650.932	968.396	0.624046	2.26299e-05
ENSMUSG00000030726	Pold3	677.42	803.253	966.711	1072.05	0.514509	2.27197e-05
ENSMUSG00000064037	Gpn1	315.958	299.252	454.207	497.972	0.527545	2.35834e-05
ENSMUSG00000052563	D930048N14Rik	9.28341	14.5331	26.3602	25.7241	1.47844	2.36179e-05
ENSMUSG00000017664	Slc35c2	346.291	415.68	554.113	587.344	0.678115	2.41689e-05
ENSMUSG00000030223	Ptpro	91.3599	115.08	149.086	164.175	0.69983	2.47452e-05
ENSMUSG00000059027	9630013D21Rik	63.5127	69.0733	112.85	104.028	0.851281	2.50949e-05
ENSMUSG00000046997	Spsb4	282.168	357.878	403.946	397.202	0.520387	2.61061e-05
ENSMUSG00000028176	Lrrc7	69.4793	88.4726	117.899	185.195	0.781446	2.72343e-05
ENSMUSG00000021708	Rasgrf2	7.51249	8.66457	26.6254	16.3918	1.77482	2.73691e-05
ENSMUSG00000045589	Frrs1l	145.17	150.646	221.147	168.56	0.608383	2.80846e-05
ENSMUSG00000037428	Vgf	206.359	1114.4	422.729	1654.46	1.03461	2.84011e-05
ENSMUSG00000032420	Nt5e	196.672	169.396	288.859	190.724	0.559142	2.84011e-05
ENSMUSG00000020205	Phlda1	182.619	378.129	331.154	611.922	0.86004	2.85821e-05
ENSMUSG00000031383	Dusp9	14.0989	18.1813	34.6661	71.184	1.28443	2.87125e-05
ENSMUSG00000055723	Rras2	411.893	441.895	585.694	592.765	0.508293	2.90212e-05
ENSMUSG00000097183	Gm17501	88.8998	97.214	177.551	138.101	0.989518	3.34846e-05
ENSMUSG00000043872	Zmym1	208.859	216.186	311.18	332.888	0.575203	3.3982e-05
ENSMUSG00000029328	Hnrnpdl	3438.36	4017.52	5121.95	5217.07	0.576492	3.43855e-05
ENSMUSG00000022367	Has2	324.494	1386.94	529.402	1741.78	0.708966	3.47832e-05
ENSMUSG00000026037	Orc2	639.913	586.893	970.592	937.7	0.602807	3.50806e-05
ENSMUSG00000027412	Lpin3	347.963	391.869	528.919	593.189	0.604295	3.58604e-05
ENSMUSG00000037722	Gnpnat1	241.25	263.915	351.119	380.955	0.544964	3.60236e-05
ENSMUSG00000057060	Slc35f3	17.4219	15.4382	46.439	24.4807	1.40101	3.62713e-05
ENSMUSG00000026019	Wdr12	287.342	272.767	441.241	537.454	0.621483	3.67184e-05
ENSMUSG00000001833	Sept7	5865.79	5835.05	8560.2	7509.01	0.546913	3.67545e-05
ENSMUSG00000037315	Jade3	236.344	291.714	340.911	379.576	0.529947	3.69327e-05
ENSMUSG00000025613	Cct8	3524.5	3711.15	5205.44	5600.22	0.564191	3.7041e-05
ENSMUSG00000038872	Zfhx3	697.737	724.724	993.342	983.597	0.510433	3.78231e-05
ENSMUSG00000107659	Gm44170	204.827	215.633	323.181	305.445	0.658517	3.79254e-05
ENSMUSG00000066878	Gm10184	181.184	105.11	1049.05	691.046	2.53717	3.87613e-05
ENSMUSG00000022111	Uchl3	308.538	257.779	442.735	397.409	0.522666	3.89613e-05
ENSMUSG00000027201	Myef2	3333.15	2934	5039.86	4835.45	0.598076	3.8997e-05
ENSMUSG00000058355	Abce1	2894.39	2865.08	4096.43	4373.27	0.502753	3.92642e-05
ENSMUSG00000049122	Frmd3	133.583	172.041	220.742	210.49	0.732161	4.06559e-05
ENSMUSG00000021822	Plau	133.658	172.957	231.101	314.035	0.793434	4.1216e-05
ENSMUSG00000024800	Rpp30	258.93	235.626	372.647	344.727	0.524903	4.14343e-05
ENSMUSG00000058799	Nap1l1	7922.93	8646.83	11193.6	11572.4	0.50015	4.22857e-05
ENSMUSG00000042515	Mum1l1	143.278	146.941	212.021	196.725	0.566112	4.37297e-05
ENSMUSG00000034826	Nup54	518.483	665.96	733.807	862.677	0.503136	4.37776e-05
ENSMUSG00000020290	Xpo1	4171.56	4337.67	6019.78	5709.32	0.53075	4.37832e-05
ENSMUSG00000074220	Zfp382	191.27	235.386	285.012	314.983	0.584071	4.56289e-05
ENSMUSG00000103845	Gm19026	3.90805	9.12408	16.2772	3.06857	1.98401	4.60768e-05
ENSMUSG00000028175	Depdc1a	638.097	575.769	909.388	761.422	0.512469	4.65016e-05
ENSMUSG00000003824	Syce2	191.697	303.46	318.7	415.607	0.730674	4.81733e-05
ENSMUSG00000029014	Dnajc2	694.929	709.229	1028.67	1139.7	0.567407	4.82863e-05
ENSMUSG00000020608	Smc6	1759.63	1851.99	2691.49	2559.96	0.614732	4.84034e-05
ENSMUSG00000058290	Espl1	798.385	876.342	1128.97	1142.62	0.502381	5.05136e-05
ENSMUSG00000041360	Pum3	893.085	947.54	1353.9	1659.68	0.601601	5.23878e-05
ENSMUSG00000066755	Tnfsf18	2.51511	20.9206	12.635	55.7438	2.24462	5.29749e-05
ENSMUSG00000092500	Gm20400	10.0769	33.586	27.3861	42.7962	1.4098	5.31132e-05
ENSMUSG00000043445	Pgp	224.027	294.748	365.052	489.096	0.701928	5.32152e-05
ENSMUSG00000091228	Gm20390	1278.43	1277.52	1933.33	2036.4	0.597828	5.52452e-05
ENSMUSG00000079480	Pin4	213.84	179.056	348.668	523.294	0.70114	5.71083e-05
ENSMUSG00000032724	Abtb2	309.344	485.303	487.147	634.445	0.6568	5.74234e-05
ENSMUSG00000049630	C1ql3	201.515	202.616	293.524	244.09	0.539045	5.87679e-05
ENSMUSG00000007617	Homer1	671.249	1047.52	956.88	1238.57	0.51264	5.87679e-05
ENSMUSG00000051355	Commd1	359.497	352.42	527.262	497.582	0.54825	5.95107e-05
ENSMUSG00000038510	Rpf2	399.441	374.057	574.642	645.153	0.524713	5.9521e-05
ENSMUSG00000030393	Zik1	256.396	261	381.076	364.855	0.569816	6.0161e-05
ENSMUSG00000041141	Pnmal1	34.5731	19.6434	65.1641	41.5711	0.891519	6.10372e-05
ENSMUSG00000040269	Mrps28	222.459	232.799	325.25	337.81	0.549582	6.11154e-05
ENSMUSG00000027387	Zc3h8	52.6586	72.0077	90.3374	95.6484	0.775448	6.13605e-05
ENSMUSG00000097187	Gm19426	23.6077	24.9484	48.8802	41.42	1.05065	6.28646e-05
ENSMUSG00000043099	Hic1	184.102	184.914	301.091	385.874	0.709231	6.78382e-05
ENSMUSG00000107768	Gm44275	21.5592	34.9395	46.1298	39.0748	1.07016	6.8228e-05
ENSMUSG00000020471	Pold2	620.245	817.223	921.297	1164.24	0.571182	6.92829e-05
ENSMUSG00000031609	Sap30	431.965	555.28	633.013	753.215	0.548937	6.93272e-05
ENSMUSG00000040322	Slc25a24	277.853	265.008	435.776	387.324	0.648292	7.19862e-05
ENSMUSG00000071379	Hpcal1	246.761	403.169	393.693	461.315	0.67473	7.55486e-05
ENSMUSG00000025591	Tma16	168.131	180.845	248.534	304.36	0.567288	7.59414e-05
ENSMUSG00000050029	Rap2c	1011.17	1091.22	1461.81	1479.07	0.533208	7.69997e-05
ENSMUSG00000047534	Mis18bp1	928.437	898.47	1362.27	1188.3	0.555003	7.93128e-05
ENSMUSG00000032478	Nme6	98.5559	108.676	159.585	171.656	0.699847	7.99934e-05
ENSMUSG00000028609	Magoh	348.912	345.062	568.172	601.102	0.70307	8.15551e-05
ENSMUSG00000022698	Naa50	2964.84	3367.66	4307.22	4311.47	0.540402	8.36328e-05
ENSMUSG00000069135	Fgfr1op	454.96	650.688	642.911	886.418	0.500857	8.61748e-05
ENSMUSG00000075334	Rprm	224.618	367.299	358.494	451.66	0.676863	9.11406e-05
ENSMUSG00000024912	Fosl1	49.0464	155.549	84.8074	247.742	0.809961	9.17614e-05
ENSMUSG00000029646	Cdx2	2.56679	2.27614	12.5819	20.2244	2.20123	9.54423e-05
ENSMUSG00000044702	Palb2	114.336	116.051	172.304	179.643	0.594577	9.63963e-05
ENSMUSG00000033342	Plppr5	61.2389	194.631	102.696	182.202	0.754986	9.67141e-05
ENSMUSG00000060288	Ppih	295.087	287.273	448.188	464.334	0.601481	9.84935e-05
ENSMUSG00000021294	Kif26a	73.8028	63.2827	124.01	107.175	0.743452	9.84995e-05
ENSMUSG00000074210	E130208F15Rik	0	0	19.8012	12.692	7.67969	0.000100021
ENSMUSG00000044424	Gm9493	980.132	1115.03	1547.82	1550.13	0.659863	0.000100554
ENSMUSG00000051444	Bbs12	74.4934	80.6007	119.692	117.014	0.681521	0.000100951
ENSMUSG00000026527	Rgs7	179.656	205.64	261.611	266.895	0.542116	0.000102618
ENSMUSG00000022724	Riox2	325.397	375.212	492.574	504.296	0.601056	0.000104088
ENSMUSG00000007850	Hnrnph1	5662.33	5266.61	8374.77	7679.11	0.566135	0.000107522
ENSMUSG00000031137	Fgf13	93.6718	115.911	145.072	178.509	0.620198	0.000111505
ENSMUSG00000024785	Rcl1	187.281	203.725	266.351	329.256	0.508563	0.000113549
ENSMUSG00000108815	AC149222.1	144.617	227.812	264.351	229.537	0.86631	0.000114182
ENSMUSG00000047757	Fancb	90.9645	96.0111	165.32	182.867	0.869793	0.000116066
ENSMUSG00000008683	Rps15a	2550.28	2734.2	3713.54	3977.51	0.543937	0.000119652
ENSMUSG00000040957	Cables1	51.5487	96.3164	87.2646	151.531	0.780204	0.000124414
ENSMUSG00000026278	Bok	93.5457	115.076	187.583	192.556	0.995578	0.000124756
ENSMUSG00000053553	3110082I17Rik	219.026	193.023	315.973	343.395	0.527679	0.00012616
ENSMUSG00000059049	Frem1	294.837	250.021	428.556	333.766	0.543349	0.000126628
ENSMUSG00000034394	Lif	120.59	1043.89	179.243	1701.6	0.578656	0.00013087
ENSMUSG00000022863	Btg3	60.8786	83.7083	111.672	97.5203	0.860181	0.000131066
ENSMUSG00000044339	Alkbh2	25.7385	36.9354	49.7215	62.0678	0.945554	0.000131851
ENSMUSG00000026955	Sapcd2	241.779	247.332	347.087	364.834	0.518603	0.000134235
ENSMUSG00000026646	Suv39h2	271.408	295.399	414.561	439.937	0.617304	0.00013642
ENSMUSG00000051515	Fam181b	1147.31	907.018	1733.64	1215.32	0.596925	0.000136795
ENSMUSG00000074141	Il4i1	10.6189	176.318	30.8347	138.477	1.49644	0.000138489
ENSMUSG00000107815	Gm44257	11.8048	15.0474	28.5826	18.1389	1.25121	0.00014808
ENSMUSG00000059005	Hnrnpa3	4326.86	5143.49	6119.43	5963.52	0.501724	0.000149384
ENSMUSG00000025049	Taf5	164.308	184.849	247.208	229.336	0.592336	0.000153702
ENSMUSG00000097053	Gm1972	5.9251	4.96813	19.1773	29.8659	1.75121	0.000155258
ENSMUSG00000029513	Prkab1	332.077	335.581	485.442	476.701	0.546411	0.000155513
ENSMUSG00000024014	Pim1	263.983	532.417	389.852	638.012	0.564604	0.000161423
ENSMUSG00000024235	Map3k8	46.8601	257.344	80.427	247.93	0.780306	0.00017136
ENSMUSG00000095134	Mid1-ps1	1.67384	2.73471	32.8935	25.2975	4.21143	0.000176186
ENSMUSG00000068220	Lgals1	6213.69	6737.93	11974.6	11456.5	0.94891	0.000182292
ENSMUSG00000028889	Yrdc	127.851	156.81	189.51	208.633	0.558752	0.000185058
ENSMUSG00000020154	Ptprb	25.2815	30.1023	48.3269	33.5808	0.934621	0.000185737
ENSMUSG00000035842	Ddx11	404.69	418.942	571.187	561.094	0.501437	0.00018732
ENSMUSG00000026779	Mastl	537.656	604.002	813.472	808.582	0.599044	0.000190018
ENSMUSG00000030188	Magohb	84.0087	80.1784	139.81	147.963	0.730305	0.000190133
ENSMUSG00000046160	Olig1	6809.79	4758.87	10036.7	6681.31	0.561461	0.000201519
ENSMUSG00000054999	Naaladl1	33.9162	45.5089	60.8789	53.0013	0.844406	0.000204472
ENSMUSG00000021765	Fst	291.107	532.604	434.977	539.045	0.582018	0.000204827
ENSMUSG00000015672	Mrpl32	363.568	336.408	534.066	483.078	0.554344	0.000207435
ENSMUSG00000030871	Ears2	104.608	101.391	158.295	145.219	0.590697	0.000218382
ENSMUSG00000020411	Nipal4	39.7849	29.109	70.4871	41.6888	0.842439	0.000220969
ENSMUSG00000029377	Ereg	13.4187	21.8248	31.0008	97.2134	1.23215	0.000233903
ENSMUSG00000033170	Card10	48.9573	42.6739	81.5889	74.565	0.729537	0.0002394
ENSMUSG00000050910	Cdr2l	613.017	766.716	867.754	973.526	0.502867	0.000244829
ENSMUSG00000022485	Hoxc5	7.33445	7.29443	20.3576	18.0495	1.49499	0.000245169
ENSMUSG00000039774	Galnt12	33.8235	34.623	63.6286	78.1776	0.885477	0.000246537
ENSMUSG00000040663	Clcf1	182.398	340.831	276.479	600.471	0.607154	0.000246569
ENSMUSG00000085471	4933423P22Rik	17.8891	46.9654	41.4554	54.3007	1.23654	0.000248788
ENSMUSG00000025869	Nop16	283.665	304.132	416.862	490.885	0.555319	0.00025516
ENSMUSG00000020630	Rnaseh1	170.819	191.545	251.523	185.548	0.55578	0.000274477
ENSMUSG00000044813	Shb	123.146	194.576	210.433	343.343	0.772366	0.000278984
ENSMUSG00000041605	5730559C18Rik	155.51	144.375	237.823	261.19	0.606695	0.000287759
ENSMUSG00000030036	Mogs	506.749	700.768	767.818	935.5	0.600713	0.000287759
ENSMUSG00000035215	Lsm7	300.092	306.889	455.941	467.615	0.601569	0.000303926
ENSMUSG00000047562	Mmp10	6.47676	17.292	19.6222	66.2777	1.65224	0.000311377
ENSMUSG00000056648	Hoxb8	11.7676	13.1927	27.2225	14.8726	1.22651	0.000313581
ENSMUSG00000020988	L2hgdh	193.092	278.971	281.038	328.168	0.550511	0.000313581
ENSMUSG00000054237	Fra10ac1	251.669	215.074	368.787	332.072	0.549781	0.000326671
ENSMUSG00000063787	Chchd1	469.053	476.384	900.109	1170.47	0.941863	0.000329212
ENSMUSG00000031922	Cep57	662.691	663.188	941.415	963.79	0.508857	0.000333601
ENSMUSG00000021938	Pspc1	671.477	557.308	953.212	847.574	0.506999	0.000345546
ENSMUSG00000069372	Ctxn3	3.40371	15.8717	12.6741	22.2133	1.90037	0.000365474
ENSMUSG00000062960	Kdr	113.553	100.18	168.496	93.7985	0.575012	0.000377545
ENSMUSG00000006732	Mettl1	115.833	139.037	174.506	181.964	0.586117	0.000386691
ENSMUSG00000054400	Cklf	180.548	183.156	264.383	219.845	0.544049	0.000387935
ENSMUSG00000041596	Nlrp5-ps	7.49172	10.3958	21.1044	12.4009	1.4394	0.000389401
ENSMUSG00000078864	Gm14322	24.9101	28.1027	63.0573	49.0572	1.32348	0.00039795
ENSMUSG00000040875	Osbpl10	261.488	266.632	373.625	302.357	0.518577	0.000408632
ENSMUSG00000061143	Maml3	110.945	120.951	162.083	185.013	0.552885	0.000412942
ENSMUSG00000022523	Fgf12	63.0956	59.1268	100.247	74.0343	0.658402	0.000414493
ENSMUSG00000035407	Kank4	169.343	206.59	285.589	173.003	0.755284	0.000417196
ENSMUSG00000028179	Cth	77.5744	105.98	120.861	164.329	0.626913	0.000418289
ENSMUSG00000068457	Uty	422.528	460.217	600.587	525.55	0.507642	0.000418981
ENSMUSG00000020101	Vsir	257.337	250.406	386.613	235.894	0.588948	0.000423404
ENSMUSG00000031107	Rbmx2	130.895	153.304	203.565	238.426	0.638176	0.000426517
ENSMUSG00000097993	Ptprv	102.924	336.23	163.303	320.117	0.674535	0.000442883
ENSMUSG00000049823	Zbtb12	280.793	359.442	396.959	484.444	0.500858	0.000452661
ENSMUSG00000078906	Gm14444	5.33382	4.55973	22.13	10.0255	1.98747	0.000453513
ENSMUSG00000020287	Mpg	93.9138	114.341	140.953	132.449	0.581399	0.000461004
ENSMUSG00000032322	Pstpip1	80.8239	104.745	128.143	154.456	0.652456	0.000485939
ENSMUSG00000063804	Lin28b	3.65177	3.62864	13.0245	7.94344	1.81755	0.000485939
ENSMUSG00000044224	Dnajc21	292.985	430.793	450.469	607.522	0.624197	0.000492939
ENSMUSG00000097519	4930558J18Rik	84.7046	77.0371	126.854	99.1968	0.583685	0.000505742
ENSMUSG00000026730	Pter	541.79	462.999	800.304	603.107	0.564213	0.000545278
ENSMUSG00000020908	Myh3	3.11652	3.65929	12.1347	6.8826	1.94529	0.000568436
ENSMUSG00000008658	Rbfox1	78.9306	133.224	120.928	202.499	0.608779	0.000586128
ENSMUSG00000043300	B3galnt1	187.45	181.84	272.782	257.605	0.536155	0.000595781
ENSMUSG00000058729	Lin9	334.661	352.031	497.014	561.958	0.573786	0.000605241
ENSMUSG00000063694	Cycs	228.532	216.547	362.263	343.342	0.668496	0.000606141
ENSMUSG00000078713	Tomm5	278.915	285.248	540.759	445.338	0.955579	0.000624147
ENSMUSG00000028282	Casp8ap2	600.722	564.473	866.301	847.775	0.530203	0.00063819
ENSMUSG00000042807	Hecw2	55.992	55.9149	92.6264	98.1699	0.74174	0.000640149
ENSMUSG00000005947	Itgae	13.4357	15.0354	29.2651	21.644	1.16943	0.000648302
ENSMUSG00000079435	Rpl36a	2274.62	2536.18	3527.46	3868.07	0.634946	0.000686059
ENSMUSG00000034412	Tbc1d10a	237.043	395.105	379.586	543.925	0.677799	0.000698887
ENSMUSG00000022947	Cbr3	87.1498	91.6714	147.574	162.297	0.749329	0.000715531
ENSMUSG00000047749	Zc3hav1l	154.864	219.204	220.105	249.877	0.507724	0.00072606
ENSMUSG00000069049	Eif2s3y	786.88	749.877	1127.91	1004.5	0.520299	0.000729708
ENSMUSG00000019987	Arg1	43.8029	124.505	71.6535	138.642	0.714932	0.000759044
ENSMUSG00000001946	Esam	46.2849	82.0451	95.5038	143.221	1.04642	0.000768633
ENSMUSG00000039903	Eva1c	128.707	224.55	186.014	292.37	0.533604	0.000772637
ENSMUSG00000051022	Hs3st1	96.7615	89.0898	146.115	107.511	0.604085	0.000809909
ENSMUSG00000026960	Arl6ip6	412.502	482.248	593.187	632.669	0.525277	0.000836068
ENSMUSG00000035202	Lars2	1481.68	1236.81	2620.04	2272.22	0.82441	0.00083797
ENSMUSG00000031778	Cx3cl1	634.47	4204.51	956.399	4764.73	0.593552	0.000839247
ENSMUSG00000050323	Ndufaf6	80.3354	77.8725	126.656	119.001	0.645168	0.000839377
ENSMUSG00000079184	Mphosph8	783.64	880.346	1111.06	1092.98	0.506184	0.000852453
ENSMUSG00000021176	Efcab11	140.653	128.373	201.359	161.715	0.521206	0.000872705
ENSMUSG00000002633	Shh	23.9504	19.1161	44.537	44.8498	0.893048	0.000919328
ENSMUSG00000044763	Trmt10c	207.07	199.453	308.917	347.443	0.570774	0.000920373
ENSMUSG00000043091	Tuba1c	427.255	504.57	648.848	779.063	0.607486	0.000925173
ENSMUSG00000024776	Stambpl1	97.4037	163.627	143.542	222.694	0.57217	0.00092957
ENSMUSG00000039323	Igfbp2	29664.5	33458.7	42488.9	47965	0.520522	0.000963807
ENSMUSG00000004980	Hnrnpa2b1	18874.7	17797.5	26677.1	24430.8	0.500775	0.000966565
ENSMUSG00000020953	Coch	38.6882	150.362	64.7262	127.593	0.745968	0.000971879
ENSMUSG00000061751	Kalrn	230.774	240.95	329.595	323.414	0.515304	0.000976285
ENSMUSG00000049482	Ctu2	205.256	200.098	294.38	330.547	0.515047	0.000979907
ENSMUSG00000048012	Zfp473	47.126	66.2327	79.3529	95.581	0.765391	0.00100028
ENSMUSG00000031917	Nip7	264.279	298.088	409.811	504.261	0.633743	0.00101545
ENSMUSG00000029664	Tfpi2	24.292	42.2952	44.8345	85.9539	0.896977	0.00101744
ENSMUSG00000045624	Esf1	480.757	471.505	713.55	743.97	0.571845	0.00102082
ENSMUSG00000073489	Ifi204	26.4157	305.025	48.2139	498.431	0.862461	0.00103808
ENSMUSG00000026343	Gpr39	3.3955	6.44415	12.1486	18.1884	1.80678	0.00106229
ENSMUSG00000009654	Oit3	3.3955	4.55322	16.0836	7.79802	2.18613	0.00106229
ENSMUSG00000022978	Mis18a	156.567	160.565	231.051	247.472	0.555014	0.00107489
ENSMUSG00000022792	Yars2	155.178	193.083	225.92	275.402	0.540702	0.00109066
ENSMUSG00000023243	Kcnk5	44.4347	49.4243	75.692	91.6988	0.754951	0.00110629
ENSMUSG00000007050	Lsm2	313.166	380.308	479.381	613.121	0.615831	0.00111766
ENSMUSG00000086600	C030005K06Rik	50.3048	71.2529	81.4602	141.325	0.707617	0.00111881
ENSMUSG00000007646	Rad51c	162.081	163.688	235.006	200.555	0.539503	0.00113208
ENSMUSG00000044026	Slc35g1	65.2078	96.3609	101.723	121.184	0.649188	0.00113851
ENSMUSG00000087528	9830144P21Rik	98.7083	176.361	154.718	191.248	0.660713	0.0011434
ENSMUSG00000024118	1600002H07Rik	164.272	154.171	235.032	220.974	0.513391	0.00115251
ENSMUSG00000075588	Hoxb2	12.0326	25.9101	28.4395	69.1513	1.21094	0.00117314
ENSMUSG00000034883	Lrr1	25.7549	20.4751	48.3289	44.5376	0.893804	0.00122667
ENSMUSG00000045160	Bola3	462.946	457.946	655.892	611.278	0.503568	0.00133346
ENSMUSG00000060636	Rpl35a	590.767	628.414	984.232	1032.58	0.737387	0.00133535
ENSMUSG00000042462	Dctpp1	179.445	230.737	320.849	456.582	0.838066	0.00135429
ENSMUSG00000040658	Dnph1	113.15	110.656	162.305	166.569	0.527349	0.00137011
ENSMUSG00000078762	Haus5	227.834	195.782	329.345	340.815	0.527098	0.0013838
ENSMUSG00000078784	1810022K09Rik	679.32	832.664	989.548	1481.32	0.543329	0.00139819
ENSMUSG00000056888	Glipr1	60.5269	91.1848	93.5833	110.766	0.632156	0.0014195
ENSMUSG00000020178	Adora2a	56.9345	128.545	108.173	212.884	0.92424	0.00143464
ENSMUSG00000021662	Arhgef28	26.9843	38.5524	49.0875	50.1332	0.842132	0.00144173
ENSMUSG00000064325	Hhip	102.889	203.035	150.909	299.193	0.558427	0.00147041
ENSMUSG00000031659	Adcy7	145.319	143.641	206.999	182.487	0.522453	0.00155271
ENSMUSG00000079043	Fastkd5	87.305	79.8449	132.977	156.729	0.597751	0.00159342
ENSMUSG00000090191	9230105E05Rik	5.09831	9.12408	20.5881	20.082	2.04153	0.00160737
ENSMUSG00000058173	Smco4	42.2946	51.7516	68.7072	82.5268	0.689204	0.00161605
ENSMUSG00000056531	Ccdc18	486.895	503.023	752.567	570.751	0.629697	0.00162854
ENSMUSG00000044707	Ccnjl	128.094	144.403	181.281	250.928	0.516194	0.00168117
ENSMUSG00000093565	Rab26os	30.374	35.063	55.1875	47.6775	0.870503	0.0017441
ENSMUSG00000097705	Gm26740	2.26704	0.918074	10.6917	4.91848	2.18182	0.001778
ENSMUSG00000093954	Gm16867	141.265	251.246	203.99	317.068	0.537186	0.0018931
ENSMUSG00000058064	Gm10036	140.646	86.6354	241.294	172.602	0.778371	0.00189964
ENSMUSG00000097554	Gm26825	134.159	179.23	335.875	314.892	1.32416	0.00193761
ENSMUSG00000083649	Rasl2-9	2.80036	5.01829	11.0674	4.34916	1.87329	0.00194195
ENSMUSG00000025889	Snca	16.308	26.8208	32.4897	38.0167	0.981099	0.00197482
ENSMUSG00000023232	Serinc2	147.672	135.598	210.321	203.616	0.516129	0.00198545
ENSMUSG00000030512	Snrpa1	368.875	466.168	540.957	627.192	0.553905	0.00199404
ENSMUSG00000051341	Zfp52	77.7688	92.4679	121.425	120.471	0.620274	0.00201383
ENSMUSG00000031381	Piga	340.022	475.541	486.964	665.274	0.523534	0.00205959
ENSMUSG00000109511	Nup62	745.021	1019.22	1066.09	1424.45	0.51872	0.00207577
ENSMUSG00000046441	Cmtr2	84.5235	92.3555	129.309	134.865	0.602931	0.00207986
ENSMUSG00000057541	Pus7	599.454	727.36	856.289	1013.01	0.516172	0.00216392
ENSMUSG00000043421	Hilpda	149.77	294.102	219.988	451.891	0.560528	0.00216445
ENSMUSG00000087213	2810408I11Rik	22.9526	28.6495	44.3137	44.9057	0.95883	0.00217111
ENSMUSG00000038046	Mrm3	62.8041	66.397	94.8808	111.149	0.598055	0.0022885
ENSMUSG00000079259	Trim71	7.32624	10.5676	18.5754	31.2119	1.3063	0.00244446
ENSMUSG00000026659	Dusp12	92.3412	96.9784	132.678	148.206	0.533217	0.00244782
ENSMUSG00000030209	Grin2b	40.2732	69.6823	66.4024	91.0604	0.743668	0.00245574
ENSMUSG00000098371	Gm28037	99.8033	71.249	273.1	390.039	1.4516	0.00245574
ENSMUSG00000096916	Zfp850	76.9303	87.7447	121.653	144.089	0.655461	0.00248869
ENSMUSG00000027716	Trpc3	20.4969	20.4268	42.2641	24.5795	1.02007	0.0025012
ENSMUSG00000046718	Bst2	108.954	1744.89	157.279	1786.55	0.524033	0.00253701
ENSMUSG00000028540	Dph2	111.964	90.8201	160.723	172.463	0.512112	0.00263621
ENSMUSG00000049036	Tmem121	105.073	108.769	194.052	144.369	0.881788	0.00267879
ENSMUSG00000026429	Ube2t	165.386	206.784	236.976	268.581	0.521676	0.00272959
ENSMUSG00000040026	Saa3	1.14487	362.829	10.558	393.962	3.0968	0.00281443
ENSMUSG00000028610	Dmrtb1	12.3526	14.6065	27.7549	15.6027	1.11777	0.00282894
ENSMUSG00000023262	Acy1	220.029	229.227	329.175	338.723	0.576947	0.00293873
ENSMUSG00000097393	D030068K23Rik	33.3186	32.3088	56.0378	46.7559	0.764128	0.00305092
ENSMUSG00000022769	Sdf2l1	158.295	175.657	236.235	278.37	0.573381	0.00312053
ENSMUSG00000018830	Myh11	33.3371	28.6439	56.2452	41.1935	0.745876	0.00318841
ENSMUSG00000026785	Pkn3	114.828	146.018	174.124	182.464	0.605459	0.00320115
ENSMUSG00000085156	Snhg15	67.886	126.741	100.28	137.019	0.574014	0.00329623
ENSMUSG00000075122	Cd80	81.6982	128.226	124.307	186.506	0.60982	0.00336626
ENSMUSG00000021675	F2rl2	4.77394	6.83587	13.3911	13.5673	1.46932	0.00347777
ENSMUSG00000052415	Tchh	54.5868	77.3629	87.0665	70.8246	0.67365	0.00357691
ENSMUSG00000096740	Lbhd1	215.385	211.705	366.03	313.608	0.762462	0.0037233
ENSMUSG00000030562	Nox4	45.7789	60.8514	71.5198	69.5182	0.641007	0.0037399
ENSMUSG00000025925	Terf1	379.34	378.699	542.9	552.94	0.517144	0.00383462
ENSMUSG00000089726	Mir17hg	39.1487	51.3023	63.2925	85.9472	0.725496	0.00401335
ENSMUSG00000032469	Dbr1	146.398	147.245	213.148	226.519	0.545191	0.00402818
ENSMUSG00000023908	Pkmyt1	178.969	239.784	270.496	349.73	0.59395	0.00406924
ENSMUSG00000054013	Tmem179	16.2834	24.5623	31.0468	36.6809	0.938616	0.00410338
ENSMUSG00000069911	Fam196b	21.3426	17.7078	40.9361	32.1303	0.949668	0.00415236
ENSMUSG00000033871	Ppargc1b	23.099	33.678	40.3807	55.3247	0.818371	0.00424078
ENSMUSG00000059003	Grin2a	19.561	24.1102	35.6365	28.3163	0.852983	0.00424833
ENSMUSG00000000093	Tbx2	84.5371	102.406	120.379	99.2555	0.514396	0.00425015
ENSMUSG00000026786	Apbb1ip	100.167	198.052	145.372	262.125	0.520658	0.00426157
ENSMUSG00000025610	Map3k7cl	28.1527	44.9732	50.8442	65.6343	0.837388	0.0042671
ENSMUSG00000079707	Tcte3	0.880388	14.4951	18.4326	5.03914	4.27445	0.00427844
ENSMUSG00000053198	Prx	102.884	112.821	145.472	113.841	0.506042	0.00433602
ENSMUSG00000032101	Ddx25	79.6144	83.8089	116.642	112.019	0.533819	0.00436573
ENSMUSG00000107023	Gm42715	299.561	328.337	430.4	234.894	0.529167	0.00438377
ENSMUSG00000080717	B230307C23Rik	22.3321	34.0883	39.9543	54.9835	0.858296	0.00438742
ENSMUSG00000040594	Ranbp17	83.5072	85.8547	122.225	109.361	0.543137	0.00443741
ENSMUSG00000032890	Rims3	115.425	164.261	164.133	176.465	0.507868	0.00454511
ENSMUSG00000028546	Elavl4	78.331	66.8064	120.909	94.4109	0.615251	0.00499995
ENSMUSG00000026806	Ddx31	141.005	136.334	199.116	231.826	0.501705	0.00511712
ENSMUSG00000038910	Plcl2	121.983	153.665	176.442	214.188	0.539684	0.00513858
ENSMUSG00000097073	9430037G07Rik	98.9918	95.8218	139.925	98.8966	0.506553	0.0051623
ENSMUSG00000020526	Znhit3	124.876	108.281	184.891	175.521	0.562604	0.0052386
ENSMUSG00000037754	Ppp1r16b	12.063	21.8341	31.0564	37.185	1.36872	0.00524533
ENSMUSG00000043460	Elfn2	16.8823	14.509	34.1357	15.1015	0.971586	0.00539212
ENSMUSG00000059456	Ptk2b	105.582	152.248	153.718	221.078	0.542504	0.00540877
ENSMUSG00000021773	Comtd1	39.4499	58.218	64.89	95.6684	0.721301	0.00543368
ENSMUSG00000042379	Esm1	11.9347	25.0524	37.4918	140.683	1.64569	0.00546758
ENSMUSG00000047415	Gpr68	33.2666	74.6272	54.7031	56.3082	0.724225	0.00572002
ENSMUSG00000039546	Ajap1	32.125	17.2437	55.321	48.5439	0.773758	0.00587732
ENSMUSG00000044365	Cxxc4	66.9207	48.3551	96.9626	56.9417	0.53895	0.00591521
ENSMUSG00000022960	Donson	250.912	278.117	364.847	334.332	0.541766	0.00600166
ENSMUSG00000028687	Mutyh	73.2697	78.7506	117.424	130.594	0.683135	0.00604892
ENSMUSG00000056592	Zfp658	76.2613	66.3878	118.698	131.813	0.632521	0.0061713
ENSMUSG00000078247	Airn	99.6382	117.528	146.595	156.603	0.569859	0.00695004
ENSMUSG00000051671	Coa6	111.803	104.986	225.811	228.993	1.01191	0.00708884
ENSMUSG00000022346	Myc	329.698	699.278	467.323	1071.44	0.501592	0.00709407
ENSMUSG00000086331	Gm16310	91.5388	135.581	131.493	134.794	0.535242	0.00709885
ENSMUSG00000060550	H2-Q7	35.5776	716.127	70.8102	571.129	0.99815	0.00718906
ENSMUSG00000044966	Fbxo48	83.6154	104.72	151.679	132.123	0.862515	0.00731718
ENSMUSG00000098234	Snhg6	167.071	216.78	242.231	397.837	0.538181	0.00747799
ENSMUSG00000015652	Steap1	61.9961	76.2237	91.5725	99.8491	0.545436	0.00807631
ENSMUSG00000097040	2610316D01Rik	123.383	119.565	187.28	118.425	0.60168	0.00826974
ENSMUSG00000045327	6330549D23Rik	45.9734	51.3858	69.7472	65.1175	0.610618	0.00829095
ENSMUSG00000062794	Zfp599	26.9887	37.2639	45.966	57.0841	0.754525	0.00893147
ENSMUSG00000053626	Tll1	37.3798	59.1788	62.0822	57.0063	0.755232	0.00952978
ENSMUSG00000033847	Pla2g4c	8.76265	21.8443	22.8494	24.7126	1.40459	0.00962407
ENSMUSG00000071078	Nr2c2ap	121.626	132.115	223.276	282.636	0.876875	0.00975753
ENSMUSG00000095098	Ccdc85b	206.833	204.015	333.317	493.615	0.685125	0.00991889
ENSMUSG00000019851	Perp	42.5003	63.1053	68.6541	73.9201	0.675503	0.00996158
ENSMUSG00000061013	Mkx	88.5049	134.278	124.466	209.38	0.500966	0.0102326
ENSMUSG00000034177	Rnf43	70.2332	45.909	101.351	32.5943	0.516641	0.0103994
ENSMUSG00000107350	Gm19610	1.40115	1.79249	10.5512	7.63747	2.82223	0.0104055
ENSMUSG00000097487	Ptges3l	74.6625	76.0549	119.964	112.31	0.672327	0.0111488
ENSMUSG00000023206	Il15ra	77.6471	256.078	110.437	215.923	0.511015	0.0113951
ENSMUSG00000097239	Gm27029	137.323	145.572	226.442	93.0027	0.725654	0.0117152
ENSMUSG00000027656	Wisp2	80.6793	134.117	115.598	212.368	0.51885	0.0117318
ENSMUSG00000043419	Chd3os	49.3979	41.4022	74.2973	70.856	0.570591	0.0118219
ENSMUSG00000031355	Arhgap6	44.5969	68.4115	71.0767	77.5087	0.65595	0.0121209
ENSMUSG00000070942	Il1rl2	51.8985	62.9792	77.6309	121.57	0.567941	0.0121224
ENSMUSG00000031543	Ank1	44.2162	48.226	72.4006	61.4734	0.709191	0.0121224
ENSMUSG00000021469	Msx2	56.8524	90.8618	86.37	123.561	0.588851	0.0122283
ENSMUSG00000050675	Gp1ba	27.1063	31.4083	48.1403	18.7578	0.821817	0.0126801
ENSMUSG00000023330	Dtwd1	70.7213	110.946	100.596	123.21	0.508494	0.0128421
ENSMUSG00000047604	Frat2	135.986	137.742	194.924	222.618	0.518118	0.0139826
ENSMUSG00000048763	Hoxb3	70.4526	81.3043	104.04	88.9293	0.565146	0.0143146
ENSMUSG00000033752	Mnd1	50.5654	60.8255	74.0323	93.7861	0.549013	0.0143168
ENSMUSG00000025289	Prdx4	764.222	916.812	1093.3	1169.46	0.51759	0.0150844
ENSMUSG00000036111	Lmo1	184.756	177.831	264.613	232.57	0.515915	0.0163593
ENSMUSG00000038253	Hoxa5	29.7475	24.5502	51.5035	43.6378	0.773794	0.016441
ENSMUSG00000074797	Itpa	520.194	471.377	762.623	787.176	0.553094	0.0176095
ENSMUSG00000024190	Dusp1	172.707	378.308	247.666	411.449	0.524877	0.0178756
ENSMUSG00000022464	Slc38a4	105.59	150.867	156.919	244.598	0.579154	0.0183471
ENSMUSG00000036781	Rps27l	982.257	1127.6	1404.13	1663.46	0.516888	0.0189946
ENSMUSG00000097467	Gm26737	42.8419	25.4887	68.622	33.0829	0.660117	0.0190452
ENSMUSG00000111497	Raver1_1	76.2493	165.225	169.16	124.351	1.14742	0.0206689
ENSMUSG00000019779	Frk	60.6919	71.4042	95.2683	97.2475	0.663918	0.0241558
ENSMUSG00000036186	Fam69b	104.189	97.7422	149.19	133.994	0.509723	0.02484
ENSMUSG00000030031	Kbtbd8	82.5433	80.4243	123.721	103.486	0.586365	0.025184
ENSMUSG00000038623	Tm6sf1	75.6006	91.1163	111.613	98.2598	0.569264	0.025322
ENSMUSG00000025602	Zfp202	74.1375	78.2717	108.239	106.339	0.530726	0.0257042
ENSMUSG00000069844	Sco1	144.725	146.322	204.22	222.301	0.501054	0.0257594
ENSMUSG00000112743	AC152453.1	38.0539	47.6708	74.5055	86.2036	0.986327	0.0267628
ENSMUSG00000029815	Malsu1	201.1	227.746	292.742	270.626	0.543758	0.0310938
ENSMUSG00000018509	Cenpv	340.896	394.365	506.015	644.803	0.570382	0.0337782
ENSMUSG00000026437	Cdk18	47.4875	54.1103	81.0869	106.971	0.770798	0.0353735
ENSMUSG00000047632	Fgfbp3	126.619	123.061	180.679	127.126	0.516371	0.0385892
ENSMUSG00000100642	Gm28230	2.3477	0.465072	16.4039	5.03914	2.77173	0.0397771
ENSMUSG00000078308	Gm7293	9.1387	15.5571	28.2134	16.3784	1.62832	0.0406804
ENSMUSG00000002771	Grin2d	74.4368	96.4938	112.512	127.492	0.59476	0.0411231
ENSMUSG00000025732	Mcrip2	94.7014	108.235	172.194	201.265	0.861579	0.0461268
ENSMUSG00000086841	2410006H16Rik	540.89	740.758	809.55	1105.99	0.582881	0.0493777

## Sheet: Microglia_down
Genes downregulated by CXCR3-deficiency in microglia
ENSEMBL ID	Gene symbol	Mean normalized count				Log2 fold change	FDR
		uninfected WT	infected WT	uninfected KO	infected KO
ENSMUSG00000050708	Ftl1	144405	149690	572.639	445.881	-7.96288	0
ENSMUSG00000024899	Papss2	523.731	139.706	318.013	65.7115	-0.7119	2.28019e-99
ENSMUSG00000028214	Gem	64.4082	173.02	29.473	117.238	-1.12785	2.81483e-58
ENSMUSG00000037211	Spry1	163.298	32.6971	113.205	49.7299	-0.528775	1.70896e-54
ENSMUSG00000086503	Xist	13176.5	17114.7	4078.25	4773.82	-1.68494	1.71917e-54
ENSMUSG00000022479	Vdr	1005.82	103.647	698.936	93.2538	-0.517588	5.65808e-54
ENSMUSG00000031613	Hpgd	165.13	0.599401	95.7447	4.52321	-0.773471	3.40159e-44
ENSMUSG00000026077	Npas2	65.8468	7.56642	28.5741	9.6454	-1.2044	1.06577e-43
ENSMUSG00000022358	Fbxo32	1760.53	536.682	561.585	331.148	-1.64269	2.9435e-38
ENSMUSG00000041324	Inhba	3167.87	60712.2	727.872	26110.6	-2.11676	3.01776e-27
ENSMUSG00000052889	Prkcb	2158.12	3567.06	810.145	2859.57	-1.40534	2.01813e-26
ENSMUSG00000057329	Bcl2	518.775	574.02	342.364	365.59	-0.593223	1.38928e-25
ENSMUSG00000072676	Tmem254a	19.4101	10.1252	3.26657	7.44582	-2.55043	2.02239e-22
ENSMUSG00000046223	Plaur	6800.57	3841.78	4585.92	2661.41	-0.563376	1.43429e-21
ENSMUSG00000029304	Spp1	376731	92899.9	227144	70067.9	-0.724083	2.36848e-21
ENSMUSG00000020334	Slc22a4	231.079	500.167	115.343	369.951	-0.997495	2.85502e-21
ENSMUSG00000072812	Ahnak2	2356.94	989.227	1554.63	722.612	-0.595301	1.14252e-20
ENSMUSG00000030657	Xylt1	3074.54	524.704	2106.07	437.873	-0.541434	7.86202e-19
ENSMUSG00000030878	Cdr2	454.596	716.337	219.031	485.556	-1.04604	6.85115e-18
ENSMUSG00000022462	Slc38a2	4952	5601.99	3067.06	4852.62	-0.684894	2.59669e-17
ENSMUSG00000043262	Uevld	463.676	368.537	211.827	186.137	-1.12533	1.11971e-16
ENSMUSG00000019478	Rab4a	72.2266	67.0224	36.6116	31.0916	-0.980691	2.30707e-16
ENSMUSG00000013846	St3gal1	2087.06	7167.89	1313.86	6622.26	-0.663215	4.6232e-16
ENSMUSG00000029442	Wdr66	95.211	357.643	49.823	201.554	-0.927792	1.07497e-15
ENSMUSG00000033207	Mamdc2	541.612	32.5149	344.348	21.3068	-0.649197	3.31668e-15
ENSMUSG00000000489	Pdgfb	702.847	998.339	493.539	687.36	-0.503601	1.66066e-14
ENSMUSG00000047216	Cdh19	41.1303	27.024	19.537	19.3974	-1.05346	9.16826e-14
ENSMUSG00000041313	Slc7a1	2567.59	6470.77	1735.03	6201.04	-0.560359	2.72532e-13
ENSMUSG00000034312	Iqsec1	5362.62	2716.89	3769.38	2201.73	-0.503191	5.76876e-13
ENSMUSG00000028542	Slc6a9	220.482	1282.45	98.6205	1210.42	-1.1571	7.52062e-13
ENSMUSG00000007682	Dio2	71.5111	38.7906	45.0014	34.7829	-0.661734	3.0112e-12
ENSMUSG00000019970	Sgk1	3815.11	7210.5	2485.82	5245.73	-0.61175	1.91524e-11
ENSMUSG00000072680	Tmem254c	197.661	131.173	96.1559	69.3453	-1.03038	5.01775e-11
ENSMUSG00000041992	Rapgef5	1004.09	4199.92	591.537	4355.01	-0.758296	6.61417e-11
ENSMUSG00000031278	Acsl4	5028.36	7886.87	3221.21	6096.79	-0.63688	8.04773e-11
ENSMUSG00000053007	Creb5	1554.59	3721.17	976.478	2687.37	-0.665772	5.38018e-10
ENSMUSG00000054364	Rhob	5338.2	1872.16	2628.42	1185.73	-1.01685	5.67734e-10
ENSMUSG00000030123	Plxnd1	3703.86	5122.52	1904.36	3779.2	-0.954295	8.52321e-10
ENSMUSG00000031373	Car5b	199.27	81.8373	128.899	87.1136	-0.622851	1.3524e-09
ENSMUSG00000079685	Ulbp1	936.781	438.771	639.424	493.389	-0.543719	2.19153e-09
ENSMUSG00000046179	E2f8	499.308	192.392	337.488	145.979	-0.559851	3.7071e-09
ENSMUSG00000001020	S100a4	2453.9	86.061	1437.23	122.52	-0.767333	6.58006e-09
ENSMUSG00000030256	Bhlhe41	2657.75	1584.78	1678.41	725.562	-0.657204	8.56804e-09
ENSMUSG00000035283	Adrb1	76.8848	15.2629	48.1751	11.1121	-0.67045	1.02452e-08
ENSMUSG00000025854	Fam20c	16021.8	10466.4	11073.8	6602.04	-0.526902	1.20238e-08
ENSMUSG00000028334	Nans	2041.46	1515.82	1435.51	1141.24	-0.501397	1.25109e-08
ENSMUSG00000027510	Rbm38	166.979	160.695	115.347	163.356	-0.524916	3.65501e-08
ENSMUSG00000047205	Dusp18	343.959	151.325	238.788	115.792	-0.517434	6.02785e-08
ENSMUSG00000076441	Ass1	2591.16	7837.27	1152.91	5247.04	-1.1636	7.00385e-08
ENSMUSG00000026864	Hspa5	26779.8	39376.2	16595.6	17607.9	-0.684356	7.88074e-08
ENSMUSG00000038244	Mical2	1706.8	738.327	1179.73	486.267	-0.527294	8.3067e-08
ENSMUSG00000035107	Dcbld2	1936.58	2479.53	933.341	2029.4	-1.04745	8.54579e-08
ENSMUSG00000029552	Tes	2236.07	3258.46	1494.54	2838.26	-0.575969	1.58845e-07
ENSMUSG00000014905	Dnajb9	1621.41	2626.52	928.608	1645.1	-0.798733	1.59054e-07
ENSMUSG00000021867	Tmem254b	113.062	86.0668	41.9123	25.154	-1.44045	1.79204e-07
ENSMUSG00000039474	Wfs1	1186.16	745.471	620.27	363.909	-0.931215	5.39596e-07
ENSMUSG00000038065	Mturn	131.82	115.934	84.5644	120.141	-0.633368	7.43784e-07
ENSMUSG00000038644	Pold1	671.56	380.39	441.305	274.188	-0.60162	7.64496e-07
ENSMUSG00000020250	Txnrd1	4740.94	9319.7	2878.42	6059.69	-0.712924	1.49958e-06
ENSMUSG00000063953	Amd2	38.9642	24.7908	4.89779	1.61141	-2.99097	2.00497e-06
ENSMUSG00000033706	Smyd5	845.208	999.539	575.849	692.252	-0.545815	2.15966e-06
ENSMUSG00000054408	Spcs3	3176.07	3365.86	2197.11	2431.82	-0.5261	3.69293e-06
ENSMUSG00000023913	Pla2g7	815.727	5254.4	551.275	5253.26	-0.557651	4.69283e-06
ENSMUSG00000090958	Lrrc32	466.101	109.242	303.134	78.9907	-0.611149	6.35901e-06
ENSMUSG00000032462	Pik3cb	2969.43	2414.04	1835.7	1701.76	-0.688458	6.37728e-06
ENSMUSG00000024773	Atg2a	1416	1520.5	990.044	1042.23	-0.509786	7.84579e-06
ENSMUSG00000025856	Pdgfa	797.826	565.378	500.015	562.072	-0.665474	1.31349e-05
ENSMUSG00000044716	Dok7	505.688	508.56	126.124	177.16	-2.01123	1.65106e-05
ENSMUSG00000028634	Hivep3	1827.96	2865.28	1158.08	2299.66	-0.655081	1.75367e-05
ENSMUSG00000003355	Fkbp11	201.474	119.386	110.316	37.7294	-0.860069	1.86577e-05
ENSMUSG00000019256	Ahr	620.556	3906.27	411.034	2900.19	-0.589538	1.99211e-05
ENSMUSG00000046997	Spsb4	214.678	164.413	132.298	118.292	-0.691963	2.61061e-05
ENSMUSG00000050505	Pcdh20	35.2063	19.126	12.4359	16.2893	-1.50992	2.68842e-05
ENSMUSG00000037722	Gnpnat1	314.355	687.625	213.03	477.185	-0.552108	3.60236e-05
ENSMUSG00000038872	Zfhx3	1507.69	1110.84	993.902	822.607	-0.594274	3.78231e-05
ENSMUSG00000020423	Btg2	562.236	701.272	369.741	612.204	-0.597527	4.04076e-05
ENSMUSG00000059839	Zfp874b	140.396	143.683	97.5252	90.6336	-0.519612	5.11962e-05
ENSMUSG00000074796	Slc4a11	55.0175	14.1206	30.2557	14.5017	-0.853816	5.579e-05
ENSMUSG00000025591	Tma16	788.376	4508.38	479.321	4581.61	-0.711186	7.59414e-05
ENSMUSG00000026580	Selp	138.361	22.2681	41.7336	21.6271	-1.7256	8.47691e-05
ENSMUSG00000010660	Plcd1	176.157	275.682	106.397	174.458	-0.72274	0.000122755
ENSMUSG00000015837	Sqstm1	13177.8	44822	6961.16	20317.6	-0.915219	0.000144762
ENSMUSG00000026875	Traf1	120.439	4489.33	44.4557	3329.5	-1.43831	0.000147011
ENSMUSG00000034586	Hid1	116.489	444.762	51.9936	153.345	-1.16231	0.000182406
ENSMUSG00000025795	Rassf3	2504.36	1435.61	1725.81	892.381	-0.531353	0.000192542
ENSMUSG00000021466	Ptch1	640.511	1049.94	442.768	959.172	-0.526895	0.000225621
ENSMUSG00000063317	Usp31	1167.22	1218.73	813.616	1031.56	-0.514615	0.000233764
ENSMUSG00000001700	Gramd3	210.649	308.19	125.066	197.969	-0.743401	0.000329401
ENSMUSG00000006732	Mettl1	208.25	278.937	134.771	216.181	-0.623997	0.000386691
ENSMUSG00000032238	Rora	329.118	379.951	198.641	281.706	-0.722272	0.000395403
ENSMUSG00000050010	Shisa3	32.9024	90.3482	14.6474	112.08	-1.18846	0.000562531
ENSMUSG00000050022	Amz1	684.511	125.403	421.525	41.5371	-0.693189	0.000686059
ENSMUSG00000022947	Cbr3	117.229	70.7021	77.8861	37.9934	-0.584314	0.000715531
ENSMUSG00000018427	Ypel2	352.426	219.096	206.473	116.451	-0.765225	0.000827423
ENSMUSG00000021990	Spata13	404.186	1182.72	218.317	1668.63	-0.886105	0.000839773
ENSMUSG00000090625	Gm20721	2595.38	1378.52	1773.3	1222.39	-0.5441	0.000945904
ENSMUSG00000016349	Eef1a2	276.185	81.0394	125.154	34.1496	-1.14475	0.00120083
ENSMUSG00000002885	Adgre5	268.661	287.436	148.085	296.717	-0.849666	0.00158314
ENSMUSG00000093954	Gm16867	159.507	652.839	110.634	603.952	-0.51589	0.0018931
ENSMUSG00000109511	Nup62	1824.72	2054.79	1121.46	1602.27	-0.697474	0.00207577
ENSMUSG00000002083	Bbc3	271.858	312.906	180.539	224.681	-0.586039	0.00218949
ENSMUSG00000021236	Entpd5	562.586	705.275	382.305	434.553	-0.551755	0.00224738
ENSMUSG00000001247	Lsr	126.896	51.8842	87.199	33.6041	-0.535584	0.0022734
ENSMUSG00000037907	Ankrd13b	1607.36	462.579	965.444	393.311	-0.731017	0.0024073
ENSMUSG00000021226	Acot2	156.391	278.561	72.1121	158.813	-1.11122	0.00261031
ENSMUSG00000037172	E330009J07Rik	676.731	637.772	384.494	478.227	-0.808599	0.00280819
ENSMUSG00000025762	Larp1b	284.78	300.072	173.636	185.381	-0.706815	0.00302954
ENSMUSG00000028972	Car6	21.5051	57.3369	7.74655	20.4662	-1.45408	0.00304785
ENSMUSG00000038352	Arl5c	104.136	938.729	51.7505	695.043	-1.00278	0.00310868
ENSMUSG00000018169	Mfng	443.432	179.908	297.065	124.444	-0.572096	0.00335571
ENSMUSG00000021675	F2rl2	39.1494	16.4467	15.529	12.0334	-1.34255	0.00347777
ENSMUSG00000037553	Zdhhc18	969.027	1963.63	670.772	1334.51	-0.526168	0.00373425
ENSMUSG00000089726	Mir17hg	114.18	207.162	71.318	187.241	-0.676752	0.00401335
ENSMUSG00000030245	Golt1b	1354.93	1339.58	948.156	999.52	-0.507771	0.0041293
ENSMUSG00000046761	Fam83h	127.38	97.5958	82.8101	100.07	-0.611271	0.00478357
ENSMUSG00000021596	Mctp1	1076.2	1281.85	634.102	973.321	-0.758553	0.00478385
ENSMUSG00000030605	Mfge8	17167.9	5467.88	10573.6	2512.73	-0.693838	0.00493387
ENSMUSG00000055013	Agap1	2583.41	2451.38	1391.68	1868.69	-0.888606	0.00494638
ENSMUSG00000023048	Prr13	2924.16	2887.36	1914.5	1820.4	-0.605311	0.00504594
ENSMUSG00000063234	Gpr84	248.034	1152.3	87.3672	2152.93	-1.50086	0.00547701
ENSMUSG00000047415	Gpr68	87.0019	131.726	23.5233	72.1449	-1.86657	0.00572002
ENSMUSG00000064360	mt-Nd3	2868.13	918.31	1469.39	614.733	-0.959207	0.00612184
ENSMUSG00000033863	Klf9	559.402	383.336	329.955	316.007	-0.75706	0.00651923
ENSMUSG00000033949	Trim36	236.423	214.498	144.282	138.922	-0.70599	0.00679638
ENSMUSG00000014599	Csf1	9403.01	4254.59	4192.85	1854.93	-1.16004	0.00783739
ENSMUSG00000025986	Slc39a10	2194.26	1293.3	1313.93	813.021	-0.733572	0.0087463
ENSMUSG00000025920	Stau2	614.444	632.953	428.238	439.267	-0.516125	0.00905523
ENSMUSG00000089774	Slc5a3	983.6	518.636	589.526	525.665	-0.732507	0.0110861
ENSMUSG00000001588	Acap1	129.447	93.2595	49.4052	81.9326	-1.3817	0.0113752
ENSMUSG00000031355	Arhgap6	1331.61	685.546	816.838	550.23	-0.701595	0.0121209
ENSMUSG00000002228	Ppm1j	32.5623	15.7546	16.7537	10.3905	-0.964073	0.0128469
ENSMUSG00000019189	Rnf145	1782.86	3717.35	1252.23	3351.23	-0.504604	0.0130339
ENSMUSG00000040711	Sh3pxd2b	10940.7	8957.9	7548.06	7414.22	-0.530136	0.0136345
ENSMUSG00000034612	Chst11	2545.11	1612.12	1240.65	1195.29	-1.02935	0.0151862
ENSMUSG00000031904	Slc7a6	460.616	1003.2	323.195	906.292	-0.503221	0.0163867
ENSMUSG00000024190	Dusp1	603.176	965.564	338.805	929.342	-0.827239	0.0178756
ENSMUSG00000071076	Jund	3315.53	3888.16	1861.19	2816.55	-0.828977	0.0194396
ENSMUSG00000021996	Esd	3984.55	9164.05	2773.59	6719.16	-0.515925	0.0199779
ENSMUSG00000038508	Gdf15	316.164	714.09	206.226	307.944	-0.610952	0.0241558
ENSMUSG00000003228	Grk5	583.307	380.41	402.385	291.388	-0.529069	0.0241713
ENSMUSG00000052920	Prkg1	99.639	127.528	58.9344	40.8813	-0.753795	0.0257635
ENSMUSG00000029207	Apbb2	2213.14	2760.24	1500.73	1804.14	-0.556071	0.0272819
ENSMUSG00000055725	Paqr3	149.071	219.266	98.6787	190.854	-0.587094	0.0274054
ENSMUSG00000048578	Mlec	8327.39	5484.56	5777.66	3721.66	-0.521035	0.030368
ENSMUSG00000022747	St3gal6	149.369	111.563	90.5179	125.381	-0.716756	0.0305492
ENSMUSG00000063972	Nr6a1	146.783	134.649	93.6701	100.205	-0.642045	0.0308432
ENSMUSG00000038963	Slco4a1	1660.15	1314.84	278.004	1189.87	-2.56758	0.0313786
ENSMUSG00000026437	Cdk18	4640.02	2511.34	2770.74	1300.74	-0.7391	0.0353735
ENSMUSG00000033249	Hsf4	71.698	35.9769	40.5736	21.6252	-0.817869	0.0383018
ENSMUSG00000001918	Slc1a5	1304.8	2068.08	850.54	1719.14	-0.611213	0.0393101
ENSMUSG00000028691	Prdx1	25826.6	36613	15415.4	15210.7	-0.738563	0.048105
ENSMUSG00000039234	Sec24d	1753.08	2111.1	926.949	1270.47	-0.913775	0.0484886
ENSMUSG00000004347	Pde1c	950.08	64.8859	515.471	20.6349	-0.878204	0.0510859
ENSMUSG00000050931	Sgms2	168.403	297.432	113.417	349.52	-0.567365	0.0512064
ENSMUSG00000097815	Gm26809	2009.54	7256.83	1225.02	6665.83	-0.707231	0.0512064
ENSMUSG00000030259	Rassf8	2628.26	1177.57	1593.08	676.167	-0.717221	0.0558219
ENSMUSG00000025757	Hspa4l	1464.2	2963.79	969.683	2503.5	-0.588019	0.0579933
ENSMUSG00000044645	Gm7334	205.977	323.533	120.091	250.264	-0.765431	0.0588139
ENSMUSG00000025586	Cpeb1	388.28	298.472	232.445	156.232	-0.733734	0.0592073
ENSMUSG00000028412	Slc44a1	906.968	815.344	595.033	828.033	-0.602678	0.0598891
ENSMUSG00000053746	Ptrh1	276.191	181.885	171.188	108.885	-0.684913	0.0599841
ENSMUSG00000000127	Fer	448.257	446.617	315.194	294.412	-0.503331	0.0668628
ENSMUSG00000054545	Ugt1a6a	118.327	196.481	66.3493	157.553	-0.838711	0.0702161
ENSMUSG00000027737	Slc7a11	2224.2	22121.4	797.845	13936.6	-1.47193	0.0719224
ENSMUSG00000062257	Opcml	67.962	8.96784	41.0846	18.1699	-0.724724	0.0734437
ENSMUSG00000032786	Alas1	25545.6	20103.3	11254.3	12097.1	-1.17695	0.0799655
ENSMUSG00000085894	Gm15832	154.246	436.783	68.331	268.519	-1.17517	0.0810907
ENSMUSG00000043017	Ptgir	1115.76	1267.83	474.076	556.328	-1.22822	0.0856321
ENSMUSG00000056130	Ticam2	843.53	2474.94	584.823	1944.61	-0.519559	0.0876005
ENSMUSG00000028680	Plk3	501.474	956.564	334.815	770.572	-0.57544	0.0930189
ENSMUSG00000022371	Col14a1	69.3586	147.488	43.7115	242.712	-0.656235	0.0933689
ENSMUSG00000038987	Cfap157	58.3927	30.1653	33.3268	14.4031	-0.81079	0.0958345
ENSMUSG00000038539	Atf5	1143.37	1995.89	622.473	1568.74	-0.871122	0.105999
ENSMUSG00000024901	Peli3	123.373	63.9666	86.4106	53.4089	-0.510358	0.110652
ENSMUSG00000029490	Mfsd7a	225.368	288.857	156.792	227.004	-0.516343	0.114422
ENSMUSG00000020184	Mdm2	3929.13	6143.61	2574.31	4528.32	-0.604121	0.115093
ENSMUSG00000038121	Fam210a	1116.13	1277.42	755.073	1024.1	-0.5565	0.11637
ENSMUSG00000029102	Hgfac	13.5754	11.6995	3.2143	8.02462	-2.04715	0.117688
ENSMUSG00000039221	Rpl22l1	116.15	107.228	64.5706	51.2008	-0.834901	0.118328
ENSMUSG00000033213	AA467197	526.367	4303	262.453	3794.16	-0.99472	0.118386
ENSMUSG00000041440	Gk5	233.27	277.192	152.639	189.596	-0.609278	0.119064
ENSMUSG00000023809	Rps6ka2	1080.64	682.742	620.724	489.242	-0.796929	0.119725
ENSMUSG00000049422	Chchd10	399.563	378.798	281.238	149.254	-0.504089	0.122342
ENSMUSG00000024143	Rhoq	2069.64	4011.4	1415.13	3164.1	-0.541646	0.130015
ENSMUSG00000024401	Tnf	437.373	4965.07	286.098	2920.87	-0.608045	0.132908
ENSMUSG00000038523	1700003F12Rik	34.7405	34.7282	16.7292	16.8164	-1.03749	0.136651
ENSMUSG00000026623	Lpgat1	2087.54	1613.41	1378.88	1547.29	-0.591709	0.143125
ENSMUSG00000061436	Hipk2	7988.93	4201.9	4658.86	3778.14	-0.772157	0.144089
ENSMUSG00000035397	Klf16	327.81	390.05	228.014	356.983	-0.517949	0.147952
ENSMUSG00000031488	Rab11fip1	639.64	5433.74	432.203	3821.24	-0.560645	0.148318
ENSMUSG00000043079	Synpo	519.408	369.216	321.963	262.927	-0.680743	0.148453
ENSMUSG00000000266	Mid2	123.204	153.723	79.7547	77.3948	-0.624436	0.151322
ENSMUSG00000064363	mt-Nd4	59091.9	40602.2	39827.5	24627.8	-0.563067	0.163042
ENSMUSG00000078653	Cntd1	16.6398	9.99812	2.73887	7.63468	-2.59863	0.164483
ENSMUSG00000030835	Nomo1	2097.35	2304.14	1471.94	1502.53	-0.505865	0.164927
ENSMUSG00000054626	Xlr	393.676	334.786	245.351	228.828	-0.678591	0.168998
ENSMUSG00000015501	Hivep2	771.04	671.068	530.351	927.264	-0.531405	0.169102
ENSMUSG00000062995	Ica1	229.576	204.189	157.833	122.641	-0.537932	0.17501
ENSMUSG00000069516	Lyz2	252849	141320	156005	98624.7	-0.690756	0.180066
ENSMUSG00000099032	Tcf24	29.2217	23.5599	12.1749	14.7033	-1.27496	0.209598
ENSMUSG00000070604	Vsig10l	63.4601	35.8533	38.5936	23.9568	-0.707721	0.213199
ENSMUSG00000021196	Pfkp	4528.44	3460.24	3172.23	2724.2	-0.507831	0.218122
ENSMUSG00000038742	Angptl6	70.5356	286.542	38.2504	142.277	-0.868371	0.220831
ENSMUSG00000017400	Stac2	381.699	234.007	147.167	74.1734	-1.3721	0.222735
ENSMUSG00000073274	Gm14636	62.5784	61.0481	32.018	44.0096	-0.954374	0.224406
ENSMUSG00000024395	Lims2	91.7344	61.8174	50.487	44.0275	-0.865656	0.225339
ENSMUSG00000015950	Ncf1	13190.2	11699.1	8681.85	12876	-0.597502	0.235988
ENSMUSG00000043822	Adamtsl5	904.568	559.73	506.928	353.34	-0.830246	0.235988
ENSMUSG00000064267	Hvcn1	3102.45	3315.19	2046.47	2185.28	-0.595068	0.248989
ENSMUSG00000050106	Tmc8	307.081	88.3871	147.721	35.9827	-1.04625	0.249024
ENSMUSG00000021062	Rab15	407.863	122.898	253.571	85.2959	-0.684326	0.255822
ENSMUSG00000052557	Gan	929.998	758.685	609.473	611.211	-0.605585	0.264735
ENSMUSG00000030329	Pianp	79.577	8.39298	31.9509	14.5459	-1.31773	0.26981
ENSMUSG00000108484	Gm18537	88.3263	27.5512	39.7783	27.0017	-1.13596	0.274775
ENSMUSG00000073889	Il11ra1	1405.65	790.508	925.685	446.957	-0.599491	0.276134
ENSMUSG00000037638	Zbtb42	280.344	163.409	191.98	124.673	-0.544406	0.278064
ENSMUSG00000071748	Gm14698	331.717	282.274	227.078	246.629	-0.537695	0.278486
ENSMUSG00000059108	Ifitm6	185.619	91.908	85.3112	127.705	-1.11624	0.284313
ENSMUSG00000004933	Matk	205.346	16.3166	122.499	14.2893	-0.741743	0.289894
ENSMUSG00000092572	Serpinb10	39.4373	2.18653	6.83475	2.15542	-2.4702	0.29436
ENSMUSG00000002983	Relb	328.129	822.499	209.892	809.96	-0.642519	0.294556
ENSMUSG00000049723	Mmp12	234705	117806	141082	60404.6	-0.728524	0.301992
ENSMUSG00000040950	Mgl2	719.726	20.2629	263.896	6.53584	-1.43715	0.317902
ENSMUSG00000023393	Slc17a9	239.016	208.973	129.48	99.4669	-0.88072	0.342995
ENSMUSG00000027221	Chst1	80.1377	91.5985	43.9743	131.642	-0.862555	0.368776
ENSMUSG00000027313	Chac1	104.21	731.417	69.4094	844.54	-0.588304	0.374139
ENSMUSG00000041439	Mfsd6	783.678	586.202	508.662	379.838	-0.616549	0.379872
ENSMUSG00000024990	Rbp4	86.133	6.57759	9.07583	3.55637	-3.23447	0.405844
ENSMUSG00000019699	Akt3	1045.36	859.181	658.693	680.112	-0.663756	0.407349
ENSMUSG00000028124	Gclm	1304.23	2148.43	659.786	1046.06	-0.977323	0.418416
ENSMUSG00000060594	Layn	361.677	230.548	241.791	236.592	-0.573202	0.419245
ENSMUSG00000048826	Dact2	40.5573	20.4519	13.1034	8.97876	-1.64044	0.421657
ENSMUSG00000027994	Mcub	857.13	614.505	576.708	551.945	-0.565172	0.438047
ENSMUSG00000106874	Gm20186	703.071	2158.32	233.949	1637.85	-1.58994	0.439677
ENSMUSG00000040502	March9	141.792	111.447	68.9542	60.3206	-1.03414	0.468124
ENSMUSG00000041957	Pkp2	626.571	355.226	349.598	143.436	-0.836696	0.469207
ENSMUSG00000004609	Cd33	4157.35	8263.28	2193.75	2536.77	-0.915745	0.479762
ENSMUSG00000043085	Tmem82	79.116	40.6349	50.6246	22.2938	-0.63917	0.491926
ENSMUSG00000044349	Snhg11	346.605	284.628	214.952	163.492	-0.681532	0.510019
ENSMUSG00000022636	Alcam	5957.41	7559.95	3851.97	4628.4	-0.623764	0.521057
ENSMUSG00000044080	S100a1	1988.91	501.348	1386.17	257.923	-0.516048	0.539246
ENSMUSG00000054342	Kcnn4	348.014	77.5644	183.797	80.6543	-0.921729	0.546219
ENSMUSG00000097429	Gm26520	49.3741	105.074	27.0581	75.6204	-0.854886	0.562701
ENSMUSG00000027399	Il1a	1948.65	110175	1142.21	91435.4	-0.764035	0.565625
ENSMUSG00000011096	Akt1s1	708.767	872.516	490.65	601.658	-0.524689	0.567189
ENSMUSG00000050370	Ch25h	1232.13	5718.09	481.586	6538.38	-1.35287	0.571005
ENSMUSG00000037905	Bri3bp	818.062	1479.84	524.042	702.153	-0.633791	0.572851
ENSMUSG00000040904	Gm21988	91.458	118.832	53.7308	64.6419	-0.766779	0.580904
ENSMUSG00000040451	Sgms1	1330.22	664.389	789.156	523.558	-0.747296	0.581306
ENSMUSG00000057337	Chst3	87.6529	24.4001	52.3887	37.7938	-0.740997	0.613631
ENSMUSG00000066894	Vsig10	101.413	50.8591	69.6789	39.1345	-0.532302	0.624926
ENSMUSG00000066684	Pilrb1	246.646	1259.11	153.964	1253.44	-0.675948	0.626792
ENSMUSG00000041774	Ydjc	86.3525	34.2439	56.7509	32.1276	-0.595926	0.635586
ENSMUSG00000035572	Dcaf10	636.789	650.208	427.45	523.308	-0.568017	0.639533
ENSMUSG00000027315	Spint1	1272.7	914.031	763.514	653.492	-0.73182	0.6438
ENSMUSG00000035325	Sec31a	3837.86	4326.15	2662.19	3226.48	-0.521539	0.659229
ENSMUSG00000031995	St14	721.337	186.004	475.48	86.709	-0.595656	0.665825
ENSMUSG00000046908	Ltb4r1	51.4838	32.4369	23.2126	30.9484	-1.1616	0.670517
ENSMUSG00000026069	Il1rl1	88.0603	12.5825	38.5731	61.7154	-1.19271	0.673675
ENSMUSG00000097558	Gm26902	65.3908	191.23	36.1626	168.945	-0.849815	0.674577
ENSMUSG00000049409	Prokr1	180.549	90.1403	89.4536	92.644	-1.01555	0.684989
ENSMUSG00000039286	Fndc3b	3821.1	4042.5	2670.62	3142.57	-0.511483	0.690033
ENSMUSG00000035678	Tnfsf9	230.403	452.935	154.436	412.056	-0.571617	0.705289
ENSMUSG00000054051	Ercc6	1864.59	986.215	1179.46	692.036	-0.65532	0.72933
ENSMUSG00000050493	Fam167b	108.763	34.3909	63.4855	18.2248	-0.777512	0.735528
ENSMUSG00000038775	Vill	296.664	190.653	201.427	154.019	-0.555757	0.75
ENSMUSG00000029992	Gfpt1	1542.58	2052.16	1073.34	1277.69	-0.515604	0.768049
ENSMUSG00000024600	Slc27a6	254.628	93.8428	94.8624	18.2248	-1.42851	0.775437
ENSMUSG00000032715	Trib3	505.066	1794.6	237.115	1408.2	-1.08681	0.780823
ENSMUSG00000064356	mt-Atp8	6652.89	3593.44	4466.71	2527.48	-0.568589	0.788173
ENSMUSG00000069515	Lyz1	332.956	200.032	196.834	131.419	-0.752679	0.897789
ENSMUSG00000022303	Dcstamp	278.312	171.367	93.1245	65.4239	-1.57698	0.907382
ENSMUSG00000068794	Col28a1	50.4265	26.621	27.4983	13.742	-0.860113	0.951535
ENSMUSG00000028862	Map3k6	149.062	146.398	95.7865	98.6597	-0.630804	0.952225
ENSMUSG00000023982	Guca1a	90.3784	89.506	57.0852	48.2299	-0.667024	0.955052
ENSMUSG00000073700	Klhl21	424.861	389.751	297.412	273.784	-0.508391	0.955972
ENSMUSG00000028328	Tmod1	152.665	84.1122	89.1647	80.0102	-0.769461	0.957562
ENSMUSG00000110457	Gm45752	43.6404	12.1282	15.0813	11.0792	-1.52173	0.989814
ENSMUSG00000038331	Satb2	126.768	779.222	72.069	634.732	-0.802334	1
ENSMUSG00000045005	Fzd5	337.56	336.271	234.548	286.98	-0.517364	1
ENSMUSG00000026193	Fn1	153107	29752.4	63159	31154.4	-1.27155	1
ENSMUSG00000039395	Mreg	119.79	412.074	58.6419	318.004	-1.02196	1
ENSMUSG00000026347	Tmem163	25.8967	5.65395	10.7241	7.4679	-1.2706	1
ENSMUSG00000026579	F5	1110.01	430.471	327.736	185.691	-1.75239	1
ENSMUSG00000060568	Fam78b	708.314	184.695	475.454	170.673	-0.566109	1
ENSMUSG00000049598	Vsig8	245.982	63.9516	84.3371	30.3038	-1.53475	1
ENSMUSG00000038776	Ephx1	912.391	319.725	472.058	166.156	-0.947291	1
ENSMUSG00000096929	A330023F24Rik	107.626	54.8035	53.4456	41.306	-1.00998	1
ENSMUSG00000036067	Slc2a6	1165	776.039	446.785	490.722	-1.37937	1
ENSMUSG00000027398	Il1b	251.726	87470	80.9606	70570.2	-1.62993	1
ENSMUSG00000032802	Srxn1	2497.86	3515.55	1229.76	1666.07	-1.01624	1
ENSMUSG00000027611	Procr	563.439	9151.82	220.04	6044.5	-1.35459	1
ENSMUSG00000055485	Soga1	1501.55	1037.98	1010.29	867.921	-0.564482	1
ENSMUSG00000017737	Mmp9	709.681	5567.95	373.818	5531.16	-0.914787	1
ENSMUSG00000078896	Zfp965	24.0202	13.6044	4.57698	18.0937	-2.31072	1
ENSMUSG00000000562	Adora3	98.0451	56.6189	63.9273	76.8109	-0.605199	1
ENSMUSG00000040339	Fam102b	1254.29	1294.44	826.518	1674.9	-0.594451	1
ENSMUSG00000027999	Pla2g12a	137.536	159.881	92.4236	106.091	-0.572771	1
ENSMUSG00000028197	Col24a1	173.263	237.531	64.9622	62.1058	-1.40885	1
ENSMUSG00000036853	Mcoln3	130.27	29.7715	75.7627	9.27897	-0.77803	1
ENSMUSG00000054942	Miga1	402.425	324.996	267.36	263.71	-0.58417	1
ENSMUSG00000093738	AI606473	22.9593	17.3278	8.82081	14.7911	-1.39841	1
ENSMUSG00000043252	Tmem64	490.155	194.585	310.236	151.95	-0.653389	1
ENSMUSG00000041153	Osgin2	353.009	918.214	214.135	679.004	-0.713136	1
ENSMUSG00000066191	Anks6	125.273	141.63	80.4613	65.8102	-0.632503	1
ENSMUSG00000028417	Tal2	13.2727	25.6344	1.96151	35.1145	-2.81783	1
ENSMUSG00000034853	Acot11	533.85	370.014	361.704	240.973	-0.557541	1
ENSMUSG00000086320	Gm12840	62.424	192.432	27.0698	183.473	-1.20073	1
ENSMUSG00000000409	Lck	30.4964	82.7256	14.507	42.2474	-1.06226	1
ENSMUSG00000028885	Smpdl3b	418.413	2299.01	282.833	2629.79	-0.558473	1
ENSMUSG00000096351	Samd11	21.5874	68.5272	8.5299	27.3718	-1.33659	1
ENSMUSG00000029379	Cxcl3	549.955	29850.5	177.881	23650.7	-1.61783	1
ENSMUSG00000058427	Cxcl2	456.857	23807.2	170.72	12372.7	-1.40998	1
ENSMUSG00000061578	Ksr2	288.745	36.5455	202.496	40.3025	-0.50933	1
ENSMUSG00000015942	Gtf2ird2	377.762	250.585	241.312	260.924	-0.644566	1
ENSMUSG00000005373	Mlxipl	153.999	4.78049	65.6171	1.1665	-1.22538	1
ENSMUSG00000066682	Pilrb2	304.382	1306.14	188.607	1310.04	-0.679449	1
ENSMUSG00000052271	Bhlha15	11.9405	12.1121	1.54937	3.56717	-2.96074	1
ENSMUSG00000032757	Bet1	473.393	581.681	330.191	396.008	-0.511338	1
ENSMUSG00000000058	Cav2	677.759	670.977	469.032	574.885	-0.523147	1
ENSMUSG00000038648	Creb3l2	962.545	1003.89	658.79	687.41	-0.541486	1
ENSMUSG00000029915	Clec5a	1775.36	980.955	1171.15	1130.24	-0.595323	1
ENSMUSG00000044162	Tnip3	125.529	174.86	33.2386	395.097	-1.90611	1
ENSMUSG00000055027	Smyd1	49.035	29.7162	18.8195	17.9448	-1.38466	1
ENSMUSG00000097816	Gm26811	136.171	145.137	75.917	70.5184	-0.832119	1
ENSMUSG00000030084	Plxna1	20198.7	24938	12392.7	12860.6	-0.699124	1
ENSMUSG00000000811	Txnrd3	121.939	116.914	83.7162	64.7958	-0.53377	1
ENSMUSG00000030103	Bhlhe40	5974.09	3997.96	4172.36	3488.96	-0.511599	1
ENSMUSG00000030134	Rasgef1a	122.067	13.8048	67.5795	6.75567	-0.84499	1
ENSMUSG00000030109	Slc6a12	279.761	1829.7	68.0757	1946.67	-2.04217	1
ENSMUSG00000023349	Clec4n	9775.22	17104.9	6109	9069.22	-0.672338	1
ENSMUSG00000030142	Clec4e	741.135	13640	242.164	15496	-1.60443	1
ENSMUSG00000001930	Vwf	2504.86	1206.51	1594.41	423.778	-0.646847	1
ENSMUSG00000030203	Dusp16	775.722	3505.67	426.197	3989.1	-0.856931	1
ENSMUSG00000030214	Plbd1	67.5368	210.4	28.242	172.41	-1.24434	1
ENSMUSG00000070873	Lilra5	313.661	135.449	203.692	142.738	-0.617936	1
ENSMUSG00000040734	Ppp1r13l	194.262	157.527	130.103	125.272	-0.56794	1
ENSMUSG00000039013	Siglecf	263.352	17.6851	100.582	4.09101	-1.38847	1
ENSMUSG00000038888	Ctu1	131.42	273.583	76.8626	161.564	-0.763647	1
ENSMUSG00000044485	Klk1b11	20.5185	2.21107	0.783035	1.68844	-4.52674	1
ENSMUSG00000038260	Trpm4	351.23	977.232	230.705	825.358	-0.601605	1
ENSMUSG00000040435	Ppp1r15a	1074.63	3230.28	466.275	2715.11	-1.19986	1
ENSMUSG00000030826	Bcat2	1061.12	850.261	719.591	593.74	-0.555579	1
ENSMUSG00000108596	Itgam_2	294.023	162.911	167.689	113.704	-0.806262	1
ENSMUSG00000030789	Itgax	8425.28	4363.29	4277.05	1635.44	-0.97324	1
ENSMUSG00000030785	Cox6a2	56.9068	203.118	24.3829	153.365	-1.2111	1
ENSMUSG00000041836	Ptpre	3336.53	1755.06	2124.9	1446.82	-0.646811	1
ENSMUSG00000025484	Bet1l	391.111	552.964	267.882	426.822	-0.538239	1
ENSMUSG00000110040	AC034099.1	29393.3	16221.4	20478.8	11703.8	-0.515524	1
ENSMUSG00000031570	Plpp5	480.304	1383.58	288.257	973.6	-0.734937	1
ENSMUSG00000037251	Pomk	896.82	700.584	608.414	516.312	-0.554841	1
ENSMUSG00000031770	Herpud1	1575.89	3379.93	764.826	1947.48	-1.03587	1
ENSMUSG00000017765	Slc12a4	1755.16	1754.87	1230.87	1450.44	-0.506933	1
ENSMUSG00000053687	Dpep2	1454.25	928.131	788.61	581.164	-0.880179	1
ENSMUSG00000041308	Sntb2	2295.09	1901.86	1464.26	1433.16	-0.642049	1
ENSMUSG00000031722	Hp	297.571	341.356	157.077	858.462	-0.908482	1
ENSMUSG00000059412	Fxyd2	60.8842	29.1989	9.48797	29.4267	-2.68161	1
ENSMUSG00000032204	Aqp9	514.853	3392.13	263.169	2965.46	-0.962518	1
ENSMUSG00000044244	Il20rb	98.0497	353.739	62.8287	326.822	-0.636986	1
ENSMUSG00000032561	Acpp	161.642	10554.3	83.4725	5981.27	-0.94779	1
ENSMUSG00000039116	Adgrg6	130.275	299.73	84.6091	252.402	-0.612086	1
ENSMUSG00000009092	Derl3	41.5627	56.173	11.6938	13.9248	-1.85113	1
ENSMUSG00000052151	Plpp2	617.93	289.759	384.703	203.486	-0.680077	1
ENSMUSG00000020017	Hal	28.0355	1.82275	9.69671	2.85495	-1.5224	1
ENSMUSG00000036478	Btg1	6526.46	12584.6	4216.13	8368.06	-0.624297	1
ENSMUSG00000035759	Bbs10	161.23	55.7045	81.1224	38.1123	-0.980124	1
ENSMUSG00000025355	Mmp19	9106.11	700.901	3779.61	595.636	-1.26362	1
ENSMUSG00000048807	Slc35e4	927.622	671.164	505.065	484.257	-0.872818	1
ENSMUSG00000020400	Tnip1	1346.92	4344.61	935.841	6112.52	-0.521762	1
ENSMUSG00000046417	Lrrc75a	323.177	451.14	204.059	286.692	-0.653917	1
ENSMUSG00000018924	Alox15	54.1515	1.32043	16.1555	1.1665	-1.75537	1
ENSMUSG00000020788	Atp2a3	1114.53	282.682	743.526	135.351	-0.579772	1
ENSMUSG00000005950	P2rx5	44.1244	57.3418	21.9125	31.3772	-1.01233	1
ENSMUSG00000051832	E230016K23Rik	116.373	76.8423	79.7132	76.7099	-0.538066	1
ENSMUSG00000000120	Ngfr	153.846	145.659	106.127	99.3193	-0.529836	1
ENSMUSG00000017607	Tns4	204.648	87.9871	108.998	57.925	-0.899467	1
ENSMUSG00000001552	Jup	1566.42	341.554	1102.73	264.032	-0.501021	1
ENSMUSG00000048217	Nags	31.2022	15.4974	7.95561	7.0338	-1.97147	1
ENSMUSG00000053580	Tanc2	1516.47	1477.92	969.44	1042.34	-0.64015	1
ENSMUSG00000034641	Cd300ld	3026.07	1738.75	1649.1	1312.53	-0.870677	1
ENSMUSG00000025572	Tmc6	497.784	453.748	306.161	290.054	-0.694694	1
ENSMUSG00000021257	Angel1	102.242	106.898	68.4564	110.479	-0.575879	1
ENSMUSG00000021298	Gpr132	47.001	174.29	26.8494	111.636	-0.796973	1
ENSMUSG00000006360	Crip1	1067.46	80.2311	593.927	53.0974	-0.837672	1
ENSMUSG00000057069	Ero1lb	1387.95	883.993	947.667	584.31	-0.545289	1
ENSMUSG00000038732	Mboat1	224	118.522	146.02	128.172	-0.614621	1
ENSMUSG00000021356	Irf4	315.009	236.806	199.691	165.335	-0.649636	1
ENSMUSG00000057762	Gm6169	88.4097	75.0543	38.9852	140.975	-1.18132	1
ENSMUSG00000021643	Serf1	140.001	270.331	97.7421	164.837	-0.510622	1
ENSMUSG00000021636	Marveld2	92.284	36.9338	53.74	22.2007	-0.77358	1
ENSMUSG00000037759	Ptger2	211.635	727.667	137.657	492.736	-0.609777	1
ENSMUSG00000040618	Pck2	778.994	1843.98	532.415	1494.14	-0.545288	1
ENSMUSG00000022126	Acod1	415.504	28305.7	258.513	24782.3	-0.676977	1
ENSMUSG00000095663	Gm2310	50.3617	47.5559	29.0609	32.8868	-0.79046	1
ENSMUSG00000022304	Dpys	16.0814	24.0527	4.76903	12.7475	-1.69497	1
ENSMUSG00000005125	Ndrg1	467.673	591.924	265.152	344.452	-0.81397	1
ENSMUSG00000036661	Dennd3	667.134	301.238	413.959	215.111	-0.681029	1
ENSMUSG00000071713	Csf2rb	20524.2	17951.5	14021.5	13184.4	-0.543971	1
ENSMUSG00000054277	Arfgap3	920.33	992.452	597.014	699.981	-0.61705	1
ENSMUSG00000048218	Amigo2	218.652	37.8989	128.762	29.9726	-0.752166	1
ENSMUSG00000023088	Abcc1	2781.86	8423.86	1807.53	6568.02	-0.615254	1
ENSMUSG00000084834	4930565N06Rik	54.0127	61.5826	27.4596	41.0536	-0.979608	1
ENSMUSG00000002845	Tmem39a	459.734	730.696	323.247	512.429	-0.503409	1
ENSMUSG00000087141	Plcxd2	176.482	290.691	114.612	171.816	-0.617269	1
ENSMUSG00000022895	Ets2	2738.25	11241.1	1344.07	9104.62	-1.01992	1
ENSMUSG00000024011	Pi16	63.4764	23.5013	37.0631	27.8336	-0.774449	1
ENSMUSG00000016283	H2-M2	63.6399	6676.74	24.2503	4728.25	-1.383	1
ENSMUSG00000090675	Olfr111	327.204	317.268	216.848	148.126	-0.587406	1
ENSMUSG00000051611	Olfr112	36.3115	25.5765	17.4436	5.85649	-1.05507	1
ENSMUSG00000023947	Nfkbie	258.435	612.776	162.312	625.051	-0.668083	1
ENSMUSG00000064043	Trerf1	800.801	257.263	517.499	268.689	-0.625241	1
ENSMUSG00000034382	AI661453	23.4163	10.7096	8.56515	7.25554	-1.44838	1
ENSMUSG00000042265	Trem1	294.711	1132.32	162.693	1190.36	-0.850187	1
ENSMUSG00000032915	Adgre4	92.9543	16.7442	37.3962	37.1473	-1.28988	1
ENSMUSG00000051439	Cd14	4201.5	25142.6	1507.29	19211.1	-1.47343	1
ENSMUSG00000024594	Prrc1	1334.79	1443.82	922.394	1022.22	-0.527317	1
ENSMUSG00000024610	Cd74	1285.54	1111.54	848.027	681.494	-0.595645	1
ENSMUSG00000032688	Malt1	3886.09	6770.39	1892.44	4716.46	-1.03295	1
ENSMUSG00000024646	Cyb5a	1896.14	1778.05	1313.54	1415.67	-0.523575	1
ENSMUSG00000061451	Tmem151a	107.432	56.8695	44.252	13.5349	-1.27168	1
ENSMUSG00000045664	Cdc42ep2	329.584	328.344	204.575	345.554	-0.679417	1
ENSMUSG00000036098	Myrf	687.644	189.486	333.286	81.6639	-1.04411	1
ENSMUSG00000039982	Dtx4	1485.46	2595.26	801.479	1911.74	-0.881751	1
ENSMUSG00000024770	Lipn	113.699	19.9782	78.6978	26.5149	-0.526963	1
ENSMUSG00000044345	Marveld1	403.858	206.568	269	193.508	-0.575119	1
ENSMUSG00000041552	Ptchd1	199.799	20.504	135.971	15.8129	-0.548794	1

## Sheet: Microglia_up
Genes upregulated by CXCR3-deficiency in microglia
ENSEMBL ID	Gene symbol	Mean normalized count				Log2 fold change	FDR
		uninfected WT	infected WT	uninfected KO	infected KO
ENSMUSG00000062382	Ftl1-ps1	736.986	749.498	121583	94560.6	7.37111	0
ENSMUSG00000021091	Serpina3n	270.769	174.695	589.139	330.98	1.12768	1.96479e-138
ENSMUSG00000021136	Smoc1	27.4814	17.2894	63.4887	34.2026	1.21548	2.14355e-96
ENSMUSG00000018411	Mapt	31.4063	27.5446	346.755	280.765	3.46917	7.43997e-94
ENSMUSG00000029005	Draxin	19.9999	184.023	73.1586	371.715	1.87164	1.63065e-92
ENSMUSG00000015829	Tnr	72.2877	43.12	305.817	169.316	2.08484	2.39537e-89
ENSMUSG00000073418	C4b	48.787	21.6379	196.317	36.7334	2.01466	1.51876e-88
ENSMUSG00000042671	Rgs8	75.957	135.59	143.079	169.347	0.919707	1.03776e-84
ENSMUSG00000040373	Cacng5	14.2899	3.11017	30.9606	11.8135	1.11289	1.86283e-76
ENSMUSG00000024347	Psd2	25.4612	9.3807	65.0983	54.4072	1.365	1.67807e-73
ENSMUSG00000004951	Hspb1	47.8488	36.984	98.81	78.1569	1.05479	2.19169e-72
ENSMUSG00000054477	Kcnn2	3.36977	0.899101	14.3225	13.6796	2.10334	3.46662e-58
ENSMUSG00000039533	Mmd2	45.9962	6.48161	74.974	40.1122	0.708141	5.14941e-58
ENSMUSG00000056758	Hmga2	263.37	422.768	579.992	928.946	1.14488	6.23533e-56
ENSMUSG00000004558	Ndrg2	73.7176	41.7236	133.786	75.2874	0.871044	1.10585e-55
ENSMUSG00000026576	Atp1b1	166.435	68.2786	360.005	296.878	1.11916	3.13666e-55
ENSMUSG00000034648	Lrrn1	13.2025	5.47587	37.8348	30.8164	1.52552	2.11362e-53
ENSMUSG00000055022	Cntn1	35.8563	16.2035	123.239	94.9408	1.78755	9.08415e-53
ENSMUSG00000071847	Apcdd1	21.2993	8.61905	52.1047	18.1224	1.29821	1.66839e-52
ENSMUSG00000026442	Nfasc	58.6252	31.4473	200.223	142.028	1.78077	9.51261e-52
ENSMUSG00000097767	Miat	21.8709	12.8258	187.785	127.806	3.10969	3.40924e-50
ENSMUSG00000031465	Angpt2	90.2692	26.6518	170.785	36.2153	0.928032	1.22709e-49
ENSMUSG00000020674	Pxdn	174.506	393.724	388.833	710.13	1.16414	3.06334e-48
ENSMUSG00000037411	Serpine1	589.514	1499.5	1892.07	3354.62	1.6885	2.76345e-47
ENSMUSG00000029778	Adcyap1r1	38.3846	10.9144	88.4055	47.0694	1.21117	1.46084e-46
ENSMUSG00000054555	Adam12	84.9296	108.945	273.818	217.978	1.69754	7.71738e-45
ENSMUSG00000051855	Mest	36.2046	7.47779	77.5583	35.582	1.1007	9.09538e-45
ENSMUSG00000045994	B3gat1	14.0237	10.444	120.332	122.399	3.10611	1.01151e-43
ENSMUSG00000038077	Kcna6	55.3796	16.9556	90.4171	43.6906	0.71631	8.58374e-43
ENSMUSG00000036995	Asap3	49.3559	35.7988	89.5428	52.3725	0.865916	4.13694e-42
ENSMUSG00000075590	Nrbp2	48.1533	22.7407	83.105	44.7069	0.789252	3.90798e-41
ENSMUSG00000017639	Rab11fip4	52.2595	72.6942	109.669	114.478	1.07229	1.08781e-40
ENSMUSG00000024427	Spry4	26.3364	42.75	55.4402	71.9777	1.08176	4.89768e-39
ENSMUSG00000032085	Tagln	244.014	134.358	717.914	380.3	1.5629	9.02428e-39
ENSMUSG00000025582	Nptx1	42.0205	17.9507	67.906	79.4427	0.698139	1.32042e-38
ENSMUSG00000032181	Scg3	36.8365	22.2116	112.482	104.714	1.62118	1.97668e-37
ENSMUSG00000001349	Cnn1	29.6823	6.07747	66.6012	12.9472	1.16916	5.90614e-37
ENSMUSG00000041708	Mpped1	1.48879	1.89528	21.8748	38.8612	3.88815	6.11014e-37
ENSMUSG00000050232	Cxcr3	2.12247	2.58331	10.4089	14.5219	2.32065	6.95363e-37
ENSMUSG00000061080	Lsamp	16.0778	9.48624	62.3099	64.0104	1.95592	1.27186e-34
ENSMUSG00000058975	Kcnc1	18.8494	11.8432	77.9563	81.9857	2.05069	1.73608e-34
ENSMUSG00000020601	Trib2	49.1098	52.873	144.618	174.518	1.56967	2.47595e-34
ENSMUSG00000003279	Dlgap1	16.1188	16.2346	86.7913	85.1912	2.43382	4.01195e-34
ENSMUSG00000001036	Epn2	86.7997	176.335	164.334	218.648	0.924705	5.31567e-34
ENSMUSG00000038587	Akap12	403.85	613.478	1042.03	1009.19	1.37412	1.1507e-33
ENSMUSG00000005338	Cadm3	21.5882	22.1296	111.102	111.315	2.36915	4.50621e-33
ENSMUSG00000035279	Ssc5d	31.183	17.1241	56.1363	27.3135	0.853717	2.33647e-32
ENSMUSG00000079484	Phyhd1	163.701	564.055	247.205	508.54	0.601113	6.35011e-32
ENSMUSG00000022469	Rapgef3	30.264	9.23453	52.5785	23.4603	0.805951	2.92725e-31
ENSMUSG00000059901	Adamts14	71.0551	142.969	137.712	150.928	0.961462	3.06619e-31
ENSMUSG00000048583	Igf2	148.269	92.6877	1314.55	517.601	3.15324	1.49758e-30
ENSMUSG00000047793	Sned1	139.256	68.0418	477.433	58.0294	1.78324	3.13385e-29
ENSMUSG00000020642	Rnf144a	34.63	36.5455	67.5578	84.9474	0.965757	4.90393e-29
ENSMUSG00000021453	Gadd45g	300.995	70.4239	464.22	96.658	0.6283	9.48163e-29
ENSMUSG00000050069	Grem2	15.2656	59.1956	46.7022	220.65	1.61649	4.61319e-28
ENSMUSG00000035783	Acta2	318.157	99.115	1036.32	246.821	1.7098	5.41753e-28
ENSMUSG00000069793	Slfn9	1166.17	1160.37	2139.35	1756.99	0.881495	1.12363e-27
ENSMUSG00000021215	Net1	693.798	270.997	1232.23	289.877	0.835483	1.45647e-27
ENSMUSG00000034059	Ypel4	14.3237	10.9294	41.2578	23.971	1.53162	3.1516e-27
ENSMUSG00000038453	Srcin1	17.6168	16.5269	122.444	103.393	2.80283	3.82528e-27
ENSMUSG00000062209	Erbb4	32.3682	19.7906	262.533	188.997	3.02928	5.0637e-27
ENSMUSG00000028780	Sema3c	32.9225	146.41	77.9884	306.066	1.25404	8.43747e-27
ENSMUSG00000064373	Selenop	4042.72	1754.33	7163.45	2575.29	0.831259	1.71076e-26
ENSMUSG00000029769	Ccdc136	34.3619	25.4072	68.1078	41.383	0.990885	1.97667e-26
ENSMUSG00000025978	Rftn2	66.1765	73.2131	98.1403	89.9752	0.568385	2.86743e-26
ENSMUSG00000020333	Acsl6	25.4575	16.8489	73.8967	61.62	1.5462	6.81641e-26
ENSMUSG00000033768	Nrxn2	72.8251	46.308	268.777	189.251	1.89089	9.76634e-26
ENSMUSG00000032036	Kirrel3	13.7384	10.7107	36.2036	24.2241	1.40319	1.06477e-25
ENSMUSG00000028364	Tnc	1892.91	7124.78	3987.31	12897.9	1.08139	1.61282e-25
ENSMUSG00000049939	Lrrc4	15.539	25.1724	39.4248	73.4814	1.3503	3.20348e-25
ENSMUSG00000002475	Abhd3	45.7857	17.4748	82.4583	20.6457	0.853278	3.20778e-25
ENSMUSG00000038530	Rgs4	13.228	3.31389	43.0291	12.2913	1.70807	1.2132e-24
ENSMUSG00000039037	St6galnac5	4.78643	3.78321	17.2921	22.5324	1.8664	1.50665e-24
ENSMUSG00000042834	Nrep	210.737	82.4026	667.611	488.944	1.66989	1.64377e-24
ENSMUSG00000032826	Ank2	490.192	436.513	810.038	761.37	0.730593	1.74401e-24
ENSMUSG00000041329	Atp1b2	715.354	211.295	1011.39	385.938	0.505266	1.02992e-23
ENSMUSG00000020926	Adam11	4.48557	2.43824	14.5312	4.05623	1.69807	1.24925e-23
ENSMUSG00000029406	Pitpnm2	186.616	160.421	365.439	202.686	0.976083	1.40603e-23
ENSMUSG00000004665	Cnn2	440.989	191.16	702.588	261.97	0.677862	1.96004e-23
ENSMUSG00000031385	Plxnb3	71.4007	23.2335	124.987	36.2702	0.810443	5.4006e-23
ENSMUSG00000019124	Scrn1	153.946	95.385	224.592	149.732	0.548234	1.27424e-22
ENSMUSG00000049420	Tmem200a	20.8285	21.0693	66.4889	48.1039	1.67871	2.47842e-22
ENSMUSG00000043557	Mdga1	74.7887	46.8913	135.289	69.9692	0.85734	5.08377e-22
ENSMUSG00000037747	Phyhipl	77.0801	62.792	162.122	160.515	1.07697	6.82526e-22
ENSMUSG00000025650	Col7a1	96.6967	80.3751	389.437	249.113	2.01495	8.18164e-22
ENSMUSG00000049252	Lrp1b	2.35851	3.38643	14.0316	19.4134	2.56767	9.32979e-22
ENSMUSG00000005089	Slc1a2	107.2	2611.4	153.408	3098.76	0.52512	2.88091e-21
ENSMUSG00000036913	Trim67	11.6917	10.6125	91.1501	105.812	2.97101	3.23687e-21
ENSMUSG00000039960	Rhou	83.5526	300.371	121.237	253.84	0.545385	3.32871e-21
ENSMUSG00000027570	Col9a3	20.6008	37.5907	51.3578	54.4053	1.31622	6.17874e-21
ENSMUSG00000071604	Fam189a2	80.0773	6.27899	161.274	3.81099	1.01432	7.71974e-21
ENSMUSG00000013921	Clip3	200.836	139.446	497.537	359.378	1.31616	8.65463e-21
ENSMUSG00000022537	Tmem44	11.9861	10.733	58.0585	40.5755	2.28142	9.5426e-21
ENSMUSG00000040152	Thbs1	1239.65	37850.2	5358.12	38814.3	2.11712	1.01496e-20
ENSMUSG00000057604	Lmcd1	11.8958	21.1514	38.6046	93.5399	1.70525	1.28728e-20
ENSMUSG00000064115	Cadm2	38.5395	41.4623	117.774	145.031	1.61574	3.11121e-20
ENSMUSG00000027457	Snph	5.69085	4.05836	15.9465	12.9453	1.49079	3.29841e-20
ENSMUSG00000059336	Slc14a1	28.0685	3.28935	51.4933	13.035	0.884163	3.55609e-20
ENSMUSG00000037852	Cpe	345.352	278.426	638.704	561.174	0.894388	4.55663e-20
ENSMUSG00000022425	Enpp2	13.2006	240.107	99.6425	716.219	2.92991	8.11983e-20
ENSMUSG00000070509	Rgma	71.3761	43.0164	101.184	96.0355	0.509195	1.20375e-19
ENSMUSG00000046318	Ccbe1	224.523	476.684	383.782	619.865	0.780493	1.47113e-19
ENSMUSG00000058297	Spock2	8.08134	9.12137	47.8539	34.4315	2.57709	1.60414e-19
ENSMUSG00000021314	Amph	9.54546	5.52496	35.0625	16.8018	1.87627	2.24826e-19
ENSMUSG00000046157	Tmem229b	945.797	1142.86	1353.83	1433.94	0.523573	2.41978e-19
ENSMUSG00000017817	Jph2	6.60259	1.87184	18.8418	4.75575	1.52114	3.0638e-19
ENSMUSG00000027254	Map1a	165.489	85.215	423.969	218.397	1.36406	3.6425e-19
ENSMUSG00000022454	Nell2	22.3877	13.4879	87.885	59.8785	1.97695	6.26214e-19
ENSMUSG00000022658	Tagln3	11.3945	6.54459	29.803	18.3381	1.39437	6.8477e-19
ENSMUSG00000033420	Antxr1	123.135	309.154	345.365	845.103	1.49357	1.38557e-18
ENSMUSG00000061576	Dpp6	7.13031	5.87375	46.5305	27.9379	2.70327	1.72165e-18
ENSMUSG00000011256	Adam19	134.029	2160.34	327.198	3476.52	1.29258	1.76547e-18
ENSMUSG00000024500	Ppp2r2b	12.8559	5.9302	35.0433	21.9146	1.4556	2.39202e-18
ENSMUSG00000059743	Fdps	696.147	262.742	1083.83	212.946	0.644958	3.27258e-18
ENSMUSG00000032816	Igdcc4	90.892	46.2409	144.222	75.8789	0.674213	3.33252e-18
ENSMUSG00000027577	Chrna4	7.239	0.948191	23.4509	6.3122	1.69972	3.43812e-18
ENSMUSG00000024330	Col11a2	25.0717	22.552	106.451	59.7492	2.0874	3.69397e-18
ENSMUSG00000003534	Ddr1	241.035	200.915	356.408	290.401	0.571554	4.90106e-18
ENSMUSG00000040998	Npnt	35.4942	17.6616	81.8986	26.7127	1.21366	5.31997e-18
ENSMUSG00000014813	Stc1	13.8918	18.1694	42.5289	47.0361	1.62777	7.36916e-18
ENSMUSG00000030519	Apba2	14.6785	7.37225	76.0521	72.6664	2.37907	7.37817e-18
ENSMUSG00000083379	Gm4919	16.106	19.5228	398.273	312.628	4.633	1.30143e-17
ENSMUSG00000022629	Kif21a	131.25	73.7192	267.796	181.549	1.03418	1.81945e-17
ENSMUSG00000069601	Ank3	85.2689	83.8488	226.829	170.17	1.41561	2.79447e-17
ENSMUSG00000030111	A2m	306.845	119.929	484.366	222.165	0.666556	3.76002e-17
ENSMUSG00000063297	Luzp2	23.3688	12.5975	43.6422	18.8713	0.911253	3.86074e-17
ENSMUSG00000066392	Nrxn3	17.6826	17.6862	153.145	131.261	3.1221	5.35439e-17
ENSMUSG00000097156	Gm3764	77.1508	59.5998	175.954	180.005	1.19394	5.97917e-17
ENSMUSG00000003849	Nqo1	77.3129	118.321	172.785	68.9714	1.16807	7.22177e-17
ENSMUSG00000028883	Sema3a	44.4334	102.551	171.09	254.615	1.95016	7.56461e-17
ENSMUSG00000049608	Gpr55	41.7977	31.8888	88.7232	53.0754	1.09613	9.19452e-17
ENSMUSG00000087408	Cers1	13.4622	6.35043	32.1999	26.1141	1.26878	3.37828e-16
ENSMUSG00000053141	Ptprt	17.0999	14.898	49.5972	44.5386	1.54441	3.38907e-16
ENSMUSG00000031119	Gpc4	102.484	121.935	177.486	193.346	0.800449	3.84624e-16
ENSMUSG00000034949	Zfr2	18.2057	25.5351	40.9676	36.9477	1.17254	3.95067e-16
ENSMUSG00000091243	Vgll3	32.8083	55.5649	85.7016	173.441	1.39144	4.01303e-16
ENSMUSG00000050953	Gja1	204.153	1775.37	358.112	1970.87	0.819545	5.47408e-16
ENSMUSG00000032009	Sesn3	167.36	126.732	293.023	186.051	0.815045	8.25345e-16
ENSMUSG00000001156	Mxd1	351.712	1194.02	546.72	1523.14	0.641316	9.48024e-16
ENSMUSG00000067879	3110035E14Rik	24.286	16.3881	50.3639	51.7683	1.05608	9.70809e-16
ENSMUSG00000089945	Pakap	64.1992	36.7867	186.072	154.2	1.53895	1.0983e-15
ENSMUSG00000038156	Spon1	38.8393	31.156	107.783	116.943	1.47667	1.58463e-15
ENSMUSG00000038264	Sema7a	58.2796	72.8171	174.664	191.311	1.59017	2.28411e-15
ENSMUSG00000028270	Gbp2	429.828	5649.21	1358.38	7796.92	1.66607	2.3408e-15
ENSMUSG00000026587	Astn1	54.7587	34.3794	239.651	190.238	2.1368	3.31668e-15
ENSMUSG00000005045	Chd5	59.0881	34.4135	195.442	104.137	1.73196	4.93729e-15
ENSMUSG00000040003	Magi2	39.379	39.9788	122.205	112.333	1.64163	5.33138e-15
ENSMUSG00000027784	Ppm1l	73.7858	79.7487	156.029	172.159	1.08564	5.34191e-15
ENSMUSG00000025207	Sema4g	18.1984	15.2714	69.8134	53.6199	1.94469	5.55676e-15
ENSMUSG00000021190	Lgmn	24117.5	9332.69	36493.6	12181.9	0.603373	5.78722e-15
ENSMUSG00000056679	Gpr173	13.1759	10.3128	30.5275	28.3461	1.2275	7.59415e-15
ENSMUSG00000074643	Cpne1	463.178	708.749	678.72	818.083	0.556745	8.75244e-15
ENSMUSG00000049281	Scn3b	19.7384	16.6079	51.6853	31.7175	1.39674	1.27146e-14
ENSMUSG00000026764	Kif5c	96.4048	109.719	344.587	357.348	1.84164	1.68458e-14
ENSMUSG00000032087	Dscaml1	11.9414	7.04801	77.9223	65.2788	2.70793	2.74572e-14
ENSMUSG00000052572	Dlg2_2	4.1655	7.56642	27.7391	19.8363	2.73299	3.11187e-14
ENSMUSG00000030088	Aldh1l1	503.606	211.117	743.245	240.969	0.568049	4.79849e-14
ENSMUSG00000042453	Reln	15.9668	9.4606	56.3234	46.0401	1.82414	4.86286e-14
ENSMUSG00000062184	Hs6st2	15.1642	7.95557	35.849	37.0599	1.24733	6.44259e-14
ENSMUSG00000001870	Ltbp1	64.8757	50.3249	122.34	108.943	0.9171	9.32541e-14
ENSMUSG00000029675	Eln	7.42299	8.51461	35.7687	34.4023	2.27083	1.2274e-13
ENSMUSG00000025324	Atp10a	1167.22	1066.48	1847.55	1099.18	0.669653	1.28349e-13
ENSMUSG00000052316	Lrrc15	3.59118	1.02073	13.6364	5.29977	1.93269	1.36929e-13
ENSMUSG00000016024	Lbp	44.9726	38.6745	70.0615	44.4156	0.6484	1.45736e-13
ENSMUSG00000010505	Myt1	12.8577	12.6455	97.1255	106.464	2.92028	1.5394e-13
ENSMUSG00000066113	Adamtsl1	30.5512	29.9924	110.467	35.7737	1.86176	2.00196e-13
ENSMUSG00000024665	Fads2	247.01	116.036	488.008	153.964	0.990304	3.02781e-13
ENSMUSG00000053646	Plxnb1	132.721	99.791	223.637	166.645	0.761717	3.47558e-13
ENSMUSG00000032017	Grik4	6.67013	9.78594	22.4925	17.7687	1.76443	5.94581e-13
ENSMUSG00000037239	Spred3	134.019	201.776	221.623	272.272	0.734338	6.25457e-13
ENSMUSG00000048387	Osr1	12.2213	7.42024	62.8272	29.282	2.36624	7.44043e-13
ENSMUSG00000035357	Pdzrn3	56.3516	57.8665	86.0391	93.5535	0.617764	9.70592e-13
ENSMUSG00000074971	Fibin	3.28488	18.5661	14.5127	38.0136	2.14931	1.08477e-12
ENSMUSG00000036885	Arhgef26	73.8752	41.4732	111.212	62.686	0.593979	1.60137e-12
ENSMUSG00000035936	Aldh5a1	28.961	27.4817	54.7916	55.2148	0.923071	1.71771e-12
ENSMUSG00000025927	Tfap2b	8.10414	2.21107	39.7831	10.9768	2.30666	1.78128e-12
ENSMUSG00000024112	Cacna1h	26.5158	18.9725	91.553	98.9487	1.78849	2.38783e-12
ENSMUSG00000034997	Htr2a	9.59751	20.5681	27.5395	55.0391	1.52955	3.01072e-12
ENSMUSG00000051359	Ncald	20.0539	12.7031	44.6116	29.1448	1.16289	3.27077e-12
ENSMUSG00000047238	Mageh1	14.3091	14.5899	34.141	36.951	1.26841	3.46504e-12
ENSMUSG00000002847	Pla1a	4.46822	154.877	24.4052	179.503	2.45796	3.55279e-12
ENSMUSG00000025422	Agap2	86.7863	31.5561	208.766	99.8244	1.26816	5.2722e-12
ENSMUSG00000023033	Scn8a	12.2688	16.1236	91.4092	79.8026	2.90565	5.77229e-12
ENSMUSG00000022762	Ncam2	19.4549	11.3185	50.0541	50.1532	1.37202	5.85777e-12
ENSMUSG00000044447	Dock5	897.644	653.397	1288.01	1139.46	0.526839	6.2217e-12
ENSMUSG00000036766	Dner	56.3493	77.3274	142.075	184.975	1.33889	6.36477e-12
ENSMUSG00000038576	Susd4	9.27386	4.68231	25.9489	30.3954	1.49594	6.67838e-12
ENSMUSG00000032291	Crabp1	16.1663	7.44369	88.1905	30.0751	2.45686	7.93551e-12
ENSMUSG00000020099	Unc5b	114.927	179.924	265.251	252.602	1.21328	8.14419e-12
ENSMUSG00000067786	Nnat	124.187	102.949	496.47	393.611	2.00468	9.47945e-12
ENSMUSG00000046402	Rbp1	57.0469	43.4165	108.129	61.7779	0.928105	1.0365e-11
ENSMUSG00000041757	Plekha6	59	17.8258	152.054	54.8375	1.37556	1.2766e-11
ENSMUSG00000036095	Dgkb	3.91397	1.02073	14.1528	9.65621	1.86799	1.2766e-11
ENSMUSG00000071424	Grid2	9.06521	8.0292	27.1513	25.215	1.59642	1.83824e-11
ENSMUSG00000028078	Dclk2	225.025	224.752	476.71	446.03	1.08958	1.89617e-11
ENSMUSG00000001131	Timp1	382.935	1347.16	936.544	2488.06	1.29754	2.13017e-11
ENSMUSG00000032269	Htr3a	0.588946	0.396781	12.6742	10.4347	4.4136	2.19666e-11
ENSMUSG00000022180	Slc7a8	3097.33	4470.56	4561.42	5511.58	0.564045	2.41337e-11
ENSMUSG00000026185	Igfbp5	717.034	3706.78	1139.77	3552.28	0.674399	2.43861e-11
ENSMUSG00000029309	Sparcl1	233.467	81.8594	441.83	158.509	0.927964	3.33287e-11
ENSMUSG00000003420	Fcgrt	843.349	470.506	1866.66	508.245	1.15164	3.45134e-11
ENSMUSG00000019775	Rgs17	25.1877	25.1364	46.0813	46.6043	0.874896	3.85214e-11
ENSMUSG00000026649	Cfap126	20.0794	5.69348	38.9129	6.7336	0.960484	4.01396e-11
ENSMUSG00000072294	Klf12	9.29666	6.17235	53.5426	53.3394	2.53425	4.16223e-11
ENSMUSG00000034926	Dhcr24	887.792	96.5401	1483.89	141.533	0.747587	4.6332e-11
ENSMUSG00000019997	Ctgf	234.205	413.368	598.449	1430.58	1.35983	6.30795e-11
ENSMUSG00000038916	Soga3	26.2597	18.1437	203.471	164.049	2.95912	7.06317e-11
ENSMUSG00000024172	St6gal2	0.29813	0.396781	15.1801	7.09066	5.56809	7.58561e-11
ENSMUSG00000037686	Aspg	5.69085	1.24789	26.5525	3.35671	2.23785	7.67485e-11
ENSMUSG00000041220	Elovl6	255.723	77.7329	403.762	92.2334	0.664535	9.69718e-11
ENSMUSG00000057614	Gnai1	20.8925	15.7557	72.2727	73.3813	1.79673	1.06812e-10
ENSMUSG00000019929	Dcn	143.997	1265.56	328.149	1687	1.19714	1.32945e-10
ENSMUSG00000028195	Cyr61	302.87	441.68	616.431	1004.7	1.03241	1.35802e-10
ENSMUSG00000054793	Cadm4	185.889	109.82	304.428	205.184	0.713789	1.58231e-10
ENSMUSG00000040896	Kcnd3	85.4629	58.2848	174.706	148.373	1.03415	1.63457e-10
ENSMUSG00000001467	Cyp51	638.28	261.93	1245.75	271.355	0.971409	1.87268e-10
ENSMUSG00000030352	Tspan9	59.6852	52.3023	165.509	110.898	1.47566	2.30885e-10
ENSMUSG00000028354	Fmn2	24.2112	37.9875	50.4514	65.8524	1.06126	2.51725e-10
ENSMUSG00000033722	BC034090	16.7525	24.2798	42.5213	47.419	1.35724	3.30877e-10
ENSMUSG00000004044	Cavin1	450.973	245.723	744.026	287.427	0.729621	3.37054e-10
ENSMUSG00000067818	Myl9	47.1302	14.0407	133.686	37.2023	1.50852	4.35298e-10
ENSMUSG00000049583	Grm5	12.4902	8.88684	37.9034	23.7624	1.60796	4.48902e-10
ENSMUSG00000037169	Mycn	4.81381	6.45706	28.9809	37.4038	2.59519	5.0241e-10
ENSMUSG00000034687	Fras1	8.11145	7.14509	31.3634	24.3374	1.96236	5.15647e-10
ENSMUSG00000041361	Myzap	10.9914	2.58331	25.028	1.1665	1.18883	5.52219e-10
ENSMUSG00000057716	Tmem178b	5.06993	9.26128	48.3486	48.1735	3.25702	7.64726e-10
ENSMUSG00000057880	Abat	46.6344	29.2545	114.287	81.9125	1.29825	7.91991e-10
ENSMUSG00000087138	Gm15545	40.3655	32.3494	118.663	101.685	1.55991	8.03217e-10
ENSMUSG00000024378	Stard4	476.405	161.245	712.981	165.663	0.587258	8.19474e-10
ENSMUSG00000038319	Kcnh2	8.37947	8.64359	35.3497	30.5819	2.08434	8.23123e-10
ENSMUSG00000023031	Cela1	36.6393	15.3194	71.4742	27.392	0.968528	8.81269e-10
ENSMUSG00000030074	Gxylt2	24.6787	27.2438	66.8765	78.4994	1.4439	9.53482e-10
ENSMUSG00000041544	Disp3	74.5618	18.5918	126.473	47.8916	0.769021	9.71312e-10
ENSMUSG00000031217	Efnb1	90.7212	96.734	139.212	121.97	0.627773	1.02406e-09
ENSMUSG00000026787	Gad2	9.61945	6.4966	139.046	127.054	3.86698	1.07381e-09
ENSMUSG00000031129	Slc9a9	278.555	94.2715	508.22	140.971	0.874696	1.17297e-09
ENSMUSG00000004360	9330159F19Rik	16.4288	14.2081	132.027	117.205	3.01125	1.28629e-09
ENSMUSG00000029245	Epha5	13.1732	13.4391	32.0715	32.4338	1.29538	1.40268e-09
ENSMUSG00000085133	B930095G15Rik	31.5757	28.0385	79.9166	78.0065	1.34395	1.72317e-09
ENSMUSG00000040428	Plekha4	17.0232	28.4759	41.9955	38.3505	1.31126	1.97305e-09
ENSMUSG00000027993	Trim2	170.97	84.5346	274.131	220.24	0.687815	2.0398e-09
ENSMUSG00000048482	Bdnf	7.1934	12.8247	20.5719	30.8257	1.52063	2.19153e-09
ENSMUSG00000058756	Thra	199.901	274.339	416.569	440.196	1.06268	2.20732e-09
ENSMUSG00000018417	Myo1b	144.221	1155.29	221.812	949.575	0.626545	2.65265e-09
ENSMUSG00000093452	Zfhx2os	7.23169	4.14045	29.6707	24.2589	2.04338	2.7834e-09
ENSMUSG00000042256	Ptchd4	3.90394	6.32698	18.5865	28.6247	2.2598	2.79522e-09
ENSMUSG00000093460	Six3os1	27.3038	24.3663	63.9758	39.3042	1.23715	2.90206e-09
ENSMUSG00000021338	Carmil1	76.294	473.274	115.87	536.18	0.609883	2.99142e-09
ENSMUSG00000041930	Fam222a	9.26927	2.29316	32.0494	20.3145	1.79478	3.42764e-09
ENSMUSG00000053552	Ebf4	5.61686	9.89258	25.6993	35.4274	2.19651	4.17018e-09
ENSMUSG00000039385	Cdh6	14.9528	201.361	29.7504	266.138	1.00296	4.38484e-09
ENSMUSG00000024302	Dtna	57.1299	65.3306	94.5135	90.5323	0.728117	4.44363e-09
ENSMUSG00000021991	Cacna2d3	3.87655	2.066	21.2447	13.8919	2.45984	4.52418e-09
ENSMUSG00000050587	Lrrc4c	9.21263	6.62668	28.4752	22.7133	1.62917	4.66009e-09
ENSMUSG00000104346	Pcdhga3	11.8977	13.5296	36.986	33.2264	1.64399	5.06779e-09
ENSMUSG00000058153	Sez6l	4.79101	1.32043	50.1	28.6576	3.39879	5.49319e-09
ENSMUSG00000008305	Tle1	125.329	145.944	177.76	149.237	0.508669	6.00978e-09
ENSMUSG00000004031	Brinp2	20.7304	9.31553	121.37	100.817	2.55733	6.33639e-09
ENSMUSG00000039103	Nexn	24.8905	20.7238	45.4733	24.8781	0.871542	6.98482e-09
ENSMUSG00000039809	Gabbr2	21.2874	10.7982	104.103	110.29	2.29983	7.42841e-09
ENSMUSG00000022240	Ctnnd2	172.824	181.044	537.605	370.706	1.6411	7.76501e-09
ENSMUSG00000041734	Kirrel	146.065	172.729	258.479	251.36	0.828464	8.32547e-09
ENSMUSG00000045348	Nyap1	26.6126	26.9433	51.792	59.4886	0.961893	8.35974e-09
ENSMUSG00000022483	Col2a1	32.8568	39.2504	80.4648	33.3068	1.30073	9.22513e-09
ENSMUSG00000036545	Adamts2	14.8232	10.0377	52.9324	16.6792	1.84023	9.80328e-09
ENSMUSG00000034813	Grip1	14.9802	12.0952	55.9216	51.1304	1.90785	1.24679e-08
ENSMUSG00000036334	Igsf10	60.9992	22.9264	133.226	45.0568	1.13538	1.37939e-08
ENSMUSG00000058258	Idi1	500.21	203.254	949.934	222.269	0.931077	1.48187e-08
ENSMUSG00000063415	Cyp26b1	52.0253	27.933	169.846	36.6508	1.71331	1.49836e-08
ENSMUSG00000038602	Slc35f1	41.1832	34.6322	92.548	104.196	1.17492	1.68643e-08
ENSMUSG00000039217	Il18	111.255	185.954	309.504	276.891	1.48338	2.16363e-08
ENSMUSG00000040612	Ildr2	100.12	41.1713	156.881	69.4271	0.658276	2.34823e-08
ENSMUSG00000025658	Cnksr2	5.03982	26.7009	21.081	38.257	2.06706	2.41923e-08
ENSMUSG00000027223	Mapk8ip1	56.2694	33.0772	139.196	93.8801	1.31013	2.82179e-08
ENSMUSG00000032549	Rab6b	133.557	137.839	245.998	229.624	0.888453	3.41519e-08
ENSMUSG00000072844	G530011O06Rik	145.525	237.209	376.46	331.189	1.37826	3.85711e-08
ENSMUSG00000046607	Hrk	0.606297	7.49278	16.5563	39.649	4.78797	4.37173e-08
ENSMUSG00000008136	Fhl2	6.84594	4.70685	20.8033	26.9029	1.60448	4.84746e-08
ENSMUSG00000020723	Cacng4	31.4584	23.783	187.105	147.038	2.57956	5.66062e-08
ENSMUSG00000023886	Smoc2	14.3118	16.4958	37.6311	27.0716	1.40308	5.6908e-08
ENSMUSG00000006576	Slc4a3	32.2121	25.6463	61.9236	49.8365	0.943128	6.10345e-08
ENSMUSG00000046432	Bex3	278.066	179.875	489.347	333.545	0.820181	6.55793e-08
ENSMUSG00000028464	Tpm2	113.428	69.0702	262.854	124.004	1.21614	6.74544e-08
ENSMUSG00000028373	Astn2	18.8988	35.3529	40.0384	51.6363	1.09372	6.79399e-08
ENSMUSG00000025867	Cplx2	35.3094	69.0936	84.2851	130.731	1.26205	7.94102e-08
ENSMUSG00000021411	Pxdc1	35.0276	112.299	58.168	134.013	0.73794	8.00324e-08
ENSMUSG00000037370	Enpp1	327.567	114.882	533.64	138.186	0.710831	8.80389e-08
ENSMUSG00000041936	Agrn	798.378	2104.66	1689.45	2922.85	1.08725	9.03012e-08
ENSMUSG00000041556	Fbxo2	51.8286	8.28744	87.3574	22.7936	0.758652	9.07564e-08
ENSMUSG00000062591	Tubb4a	72.8996	79.1886	150.011	127.824	1.04966	9.31213e-08
ENSMUSG00000030790	Adm	42.5871	249.701	101.829	374.174	1.26211	9.64171e-08
ENSMUSG00000023960	Enpp5	26.6609	18.5342	90.0053	52.1395	1.76389	1.08479e-07
ENSMUSG00000060572	Mfap2	10.7087	2.83502	27.9344	24.4929	1.39104	1.09875e-07
ENSMUSG00000028664	Ephb2	81.4251	70.3181	183.919	203.091	1.1832	1.16377e-07
ENSMUSG00000028469	Npr2	36.9621	37.7039	92.8867	72.5879	1.33473	1.29676e-07
ENSMUSG00000055435	Maf	3214.96	3510.45	6091.04	5241.93	0.927572	1.44692e-07
ENSMUSG00000033350	Chst2	127.488	76.0713	190.106	130.845	0.583873	1.82127e-07
ENSMUSG00000106379	Lhfpl3	14.6045	12.4513	36.7961	37.814	1.3376	1.97964e-07
ENSMUSG00000042978	Sbk1	240.7	150.836	461.741	339.275	0.945395	1.99168e-07
ENSMUSG00000021130	Galnt16	44.2503	20.2875	79.6549	43.0715	0.857258	2.00675e-07
ENSMUSG00000024308	Tapbp	5524.07	13238.5	10315.9	13416.4	0.906679	2.11204e-07
ENSMUSG00000020900	Myh10	643.978	439.624	1053.63	771.782	0.717611	2.70486e-07
ENSMUSG00000020524	Gria1	31.0196	19.3777	115.332	65.6861	1.89802	2.71769e-07
ENSMUSG00000033453	Adamts15	13.732	6.15846	46.5596	10.8777	1.77329	2.92827e-07
ENSMUSG00000033880	Lgals3bp	9840.55	22111.8	21992.1	25855	1.16596	3.17152e-07
ENSMUSG00000036295	Lrrn3	88.0081	21.8149	168.199	80.1238	0.940942	3.45056e-07
ENSMUSG00000025352	Gdf11	29.0304	25.2185	95.0818	51.7848	1.71591	3.80601e-07
ENSMUSG00000052914	Cyp2j6	83.8248	63.5311	121.754	78.1348	0.546138	4.3758e-07
ENSMUSG00000022440	C1qtnf6	50.1324	57.008	107.125	72.7655	1.10245	4.45379e-07
ENSMUSG00000030409	Dmpk	60.1798	19.831	198.661	38.3453	1.72848	4.57251e-07
ENSMUSG00000023868	Pde10a	41.7504	342.906	127.35	472.768	1.61207	4.57924e-07
ENSMUSG00000078716	Tmem8b	34.1296	36.3205	68.0553	52.8414	1.00232	4.89163e-07
ENSMUSG00000038296	Galnt18	20.6857	54.0942	47.7065	42.6942	1.2118	4.89487e-07
ENSMUSG00000023224	Serping1	17.6067	6.75786	53.9566	33.0249	1.61644	5.34637e-07
ENSMUSG00000021379	Id4	49.1468	21.207	120.364	98.6635	1.29488	5.56237e-07
ENSMUSG00000031790	Mmp15	47.837	23.0969	104.701	51.8854	1.13439	5.87374e-07
ENSMUSG00000027408	Cpxm1	33.4046	16.2921	123.613	25.3376	1.89111	5.93794e-07
ENSMUSG00000030218	Mgp	71.628	6.60324	167.615	4.60025	1.23285	6.12424e-07
ENSMUSG00000037206	Islr	23.9231	7.26671	46.2992	13.6227	0.96175	6.27643e-07
ENSMUSG00000006575	Rundc3a	35.4558	31.3589	126.463	121.922	1.83949	6.51276e-07
ENSMUSG00000028369	Svep1	20.6491	10.2733	96.4757	35.5434	2.23425	6.52153e-07
ENSMUSG00000031523	Dlc1	88.9193	145.982	131.1	192.282	0.569631	6.59851e-07
ENSMUSG00000021182	Ccdc88c	381.093	108.655	548.409	180.149	0.531855	8.51277e-07
ENSMUSG00000035873	Pawr	14.0703	17.2637	34.1262	40.9489	1.28743	8.86879e-07
ENSMUSG00000075592	Nynrin	104.059	44.3347	157.454	81.8635	0.609527	9.26159e-07
ENSMUSG00000037887	Dusp8	61.1206	71.9521	129.38	150.838	1.08929	9.27839e-07
ENSMUSG00000048402	Gli2	18.8394	19.0535	35.4967	27.3906	0.917995	9.40817e-07
ENSMUSG00000046743	Fat4	67.1767	80.8283	153.248	145.546	1.19528	9.56877e-07
ENSMUSG00000020121	Srgap1	39.5114	60.53	154.397	165.918	1.97131	1.06651e-06
ENSMUSG00000053199	Arhgap20	9.5327	6.57869	40.557	25.5006	2.08944	1.1949e-06
ENSMUSG00000005124	Wisp1	28.0365	67.152	76.9661	114.321	1.46737	1.23048e-06
ENSMUSG00000038248	Sobp	21.4795	21.0715	71.7764	74.734	1.7446	1.30357e-06
ENSMUSG00000047496	Rnf152	3.30768	5.68805	12.894	6.98822	1.9781	1.30526e-06
ENSMUSG00000020181	Nav3	62.9874	82.7225	225.364	226.273	1.84405	1.31168e-06
ENSMUSG00000050132	Sarm1	14.1178	8.51351	46.9034	30.1337	1.74218	1.34391e-06
ENSMUSG00000014602	Kif1a	234.862	181.539	735.393	439.559	1.65212	1.4703e-06
ENSMUSG00000018899	Irf1	623.628	1292.1	1253.45	1291.86	1.01286	1.47566e-06
ENSMUSG00000030468	Siglecg	4.50292	1.39296	23.0035	1.04388	2.35596	1.75394e-06
ENSMUSG00000069045	Ddx3y	729.748	729.363	1110.02	1030.52	0.610777	2.00016e-06
ENSMUSG00000097789	Gm2115	68.2353	20.4304	174.026	21.5689	1.35962	2.00125e-06
ENSMUSG00000024501	Dpysl3	444.129	577.738	1450.63	1702.5	1.71342	2.00125e-06
ENSMUSG00000043531	Sorcs1	57.3377	101.159	86.2264	109.213	0.589214	2.17916e-06
ENSMUSG00000002900	Lamb1	147.136	231.947	500.896	783.981	1.77384	2.27996e-06
ENSMUSG00000042359	Osbpl6	39.3014	50.0912	65.3381	89.1385	0.742592	2.38312e-06
ENSMUSG00000055799	Tcf7l1	18.2404	18.4306	42.0238	27.3135	1.21236	2.39765e-06
ENSMUSG00000034912	Mdga2	18.5304	11.3911	59.4343	30.4706	1.68343	2.41812e-06
ENSMUSG00000056124	B4galt6	1258.37	762.932	1861.6	764.995	0.570283	2.55659e-06
ENSMUSG00000036036	Zfp57	21.8481	19.0311	126.871	113.828	2.54752	2.56076e-06
ENSMUSG00000063873	Slc24a3	47.3037	179.676	106.072	97.0093	1.17701	2.58947e-06
ENSMUSG00000023800	Tiam2	85.534	70.0023	160.193	218.868	0.911471	2.59131e-06
ENSMUSG00000027520	Zdbf2	6.61536	9.09792	36.5741	39.2168	2.48147	2.69834e-06
ENSMUSG00000074415	2610203C20Rik	123.253	166.328	335.513	434.079	1.45061	2.81621e-06
ENSMUSG00000021303	Gng4	10.2257	14.0074	75.5966	56.4063	2.90011	2.83579e-06
ENSMUSG00000022836	Mylk	11.6305	10.5561	45.263	23.1822	1.961	2.84061e-06
ENSMUSG00000020646	Mboat2	25.9341	30.2272	118.367	103.077	2.19407	2.88654e-06
ENSMUSG00000046807	Lrrc75b	12.5194	11.8424	28.0855	29.6921	1.17244	2.99053e-06
ENSMUSG00000022146	Osmr	194.195	304.047	475.489	583.705	1.29716	3.23807e-06
ENSMUSG00000057346	Apol9a	1.16327	94.0834	129.26	313.174	6.76231	3.48053e-06
ENSMUSG00000027238	Frmd5	32.6636	15.1007	68.3689	56.7163	1.07096	3.56262e-06
ENSMUSG00000025892	Gria4	12.1674	6.35043	50.6847	54.4087	2.05483	3.56649e-06
ENSMUSG00000024065	Ehd3	22.0467	27.5114	50.2965	73.7506	1.19772	3.77269e-06
ENSMUSG00000051236	Msrb3	22.7068	24.5454	61.2536	38.801	1.43986	4.22591e-06
ENSMUSG00000004110	Cacna1e	3.27298	1.69376	25.1382	14.1465	2.94075	4.29581e-06
ENSMUSG00000021614	Vcan	742.672	2106.87	1434.37	3511.51	0.956876	4.4501e-06
ENSMUSG00000037892	Pcdh18	15.5783	18.1075	32.415	34.0049	1.06175	4.47288e-06
ENSMUSG00000041741	Pde3a	28.6483	23.1631	67.6944	45.3857	1.25084	4.56716e-06
ENSMUSG00000026604	Ptpn14	123.292	376.762	198.229	220.318	0.69209	4.84765e-06
ENSMUSG00000020684	Rasl10b	14.4634	6.90184	40.6892	29.6832	1.50272	4.99486e-06
ENSMUSG00000045333	Zfp423	23.4218	16.7614	47.5765	33.7939	1.03093	5.23577e-06
ENSMUSG00000024883	Rin1	64.5082	118.634	122.895	197.962	0.933929	5.87438e-06
ENSMUSG00000001864	Aif1l	14.888	8.42598	30.8542	25.6707	1.05398	5.96965e-06
ENSMUSG00000027220	Syt13	3.2876	5.70304	12.2681	20.2812	1.89542	6.31506e-06
ENSMUSG00000040488	Ltbp4	34.6126	39.8648	71.4446	76.0123	1.0507	6.59403e-06
ENSMUSG00000031661	Nkd1	13.0591	15.2457	31.3781	46.3859	1.26261	6.63988e-06
ENSMUSG00000029108	Pcdh7	443.84	777.885	702.194	1517.5	0.667657	6.74496e-06
ENSMUSG00000027208	Fgf7	23.0049	33.1817	70.4673	111.851	1.62491	6.78009e-06
ENSMUSG00000040133	Gpr176	270.153	247.167	417.099	216.115	0.63305	6.82022e-06
ENSMUSG00000034573	Ptpn13	72.5375	71.6459	117.815	104.47	0.705538	6.9533e-06
ENSMUSG00000020303	Stc2	17.6989	271.446	42.5405	550.888	1.27327	7.51959e-06
ENSMUSG00000029334	Prkg2	14.0338	38.7459	52.9605	54.8709	1.92593	7.64048e-06
ENSMUSG00000042035	Igsf3	210.908	168.417	344.869	258.709	0.712303	7.83271e-06
ENSMUSG00000052698	Tln2	446.365	195.161	773.519	252.274	0.799483	7.9798e-06
ENSMUSG00000020627	Klhl29	22.1498	17.8397	94.7072	42.394	2.10346	8.00568e-06
ENSMUSG00000032035	Ets1	85.8654	371.102	122.181	404.628	0.513645	8.50187e-06
ENSMUSG00000054256	Msi1	61.2041	46.5065	124.572	113.894	1.02873	8.7207e-06
ENSMUSG00000029168	Dpysl5	36.6611	36.9423	308.298	296.619	3.07521	8.85536e-06
ENSMUSG00000026980	Ly75	335.003	504.517	500.165	369.201	0.58614	9.35535e-06
ENSMUSG00000043664	Tmem221	78.2349	96.2443	139.679	102.888	0.840908	9.35535e-06
ENSMUSG00000038555	Reep2	21.4559	14.4363	52.8232	52.3598	1.30221	9.854e-06
ENSMUSG00000028370	Pappa	22.6164	39.326	52.6991	130.977	1.23041	1.02513e-05
ENSMUSG00000032482	Cspg5	19.1147	122.226	56.6357	139.409	1.57169	1.06261e-05
ENSMUSG00000034156	Tspoap1	112.477	28.1514	243.574	76.6314	1.12236	1.07196e-05
ENSMUSG00000026536	Ifi211	1880.89	6474.76	7332.71	9401.37	1.96858	1.09321e-05
ENSMUSG00000020357	Flt4	8.96842	16.306	28.5445	36.9824	1.67286	1.18358e-05
ENSMUSG00000020256	Aldh1l2	150.944	2232.91	222.155	1606.53	0.564035	1.219e-05
ENSMUSG00000026494	Kif26b	62.7752	41.1403	101.357	99.0915	0.697657	1.24628e-05
ENSMUSG00000027350	Chgb	4.44083	3.58905	35.7744	21.0831	3.0082	1.29284e-05
ENSMUSG00000033597	Caskin1	22.0685	18.1727	60.0247	48.228	1.44982	1.37377e-05
ENSMUSG00000059430	Actg2	11.946	6.30353	36.57	12.7329	1.62252	1.40801e-05
ENSMUSG00000017897	Eya2	3.29764	1.39296	22.3111	9.44574	2.77287	1.41206e-05
ENSMUSG00000022883	Robo1	38.306	57.4751	124.061	110.638	1.70433	1.46238e-05
ENSMUSG00000021448	Shc3	14.9455	2.98964	33.1813	20.8233	1.15295	1.48267e-05
ENSMUSG00000006800	Sulf2	2229.44	429.168	3234.06	493.344	0.543221	1.65155e-05
ENSMUSG00000095139	Pou3f2	33.1987	24.1912	60.7841	57.9302	0.878603	1.66436e-05
ENSMUSG00000041889	Shisa4	123.289	95.7637	177.537	93.2967	0.52836	1.88331e-05
ENSMUSG00000030283	St8sia1	9.21722	7.096	45.4579	25.4019	2.30876	1.92674e-05
ENSMUSG00000046056	Sbsn	23.3158	36.5831	45.2325	43.2068	0.965234	2.01803e-05
ENSMUSG00000051726	Kcnf1	3.55375	21.3616	18.8009	32.571	2.40256	2.01873e-05
ENSMUSG00000026249	Serpine2	204.718	224.452	506.667	426.481	1.31217	2.05072e-05
ENSMUSG00000029603	Dtx1	16.6183	11.4636	79.302	55.0645	2.2537	2.07599e-05
ENSMUSG00000023236	Scg5	8.69495	5.72758	32.1014	22.3159	1.89375	2.12118e-05
ENSMUSG00000035109	Shc4	26.3017	22.1776	55.7619	38.3782	1.08205	2.19374e-05
ENSMUSG00000032714	Syde1	53.9834	78.8995	93.0435	115.092	0.79071	2.26299e-05
ENSMUSG00000023411	Nfatc4	12.7929	19.8877	47.5129	52.1146	1.89687	2.45014e-05
ENSMUSG00000054728	Phactr1	26.5971	16.5002	76.8459	65.3732	1.53769	2.68836e-05
ENSMUSG00000020641	Rsad2	958.068	19351.6	4530.24	17580	2.24696	2.70654e-05
ENSMUSG00000028176	Lrrc7	16.5311	9.25908	77.0753	68.4786	2.22875	2.72343e-05
ENSMUSG00000021708	Rasgrf2	18.7855	4.7303	39.0649	12.2659	1.06321	2.73691e-05
ENSMUSG00000042804	Gpr153	26.0245	37.7189	81.1246	56.2982	1.64614	2.75622e-05
ENSMUSG00000045934	Mtmr11	51.9801	28.321	90.9118	35.2794	0.813507	2.80384e-05
ENSMUSG00000045589	Frrs1l	5.65429	2.13854	23.16	19.8236	2.03495	2.80846e-05
ENSMUSG00000041986	Elmod1	0.581634	0	17.7345	9.41286	4.89827	2.81731e-05
ENSMUSG00000102748	Pcdhgb2	48.3054	85.7266	76.5521	96.9145	0.664855	2.8986e-05
ENSMUSG00000021363	Mak	93.408	16.5673	144.282	23.2573	0.633052	3.05624e-05
ENSMUSG00000029231	Pdgfra	68.1075	61.3704	304.217	233.693	2.16469	3.13164e-05
ENSMUSG00000038738	Shank1	8.64562	8.81431	121.444	85.365	3.81221	3.43113e-05
ENSMUSG00000022367	Has2	81.5188	136.901	214.344	297.67	1.40092	3.47832e-05
ENSMUSG00000020431	Adcy1	27.0194	20.9253	71.7878	54.977	1.41642	3.58604e-05
ENSMUSG00000029510	Gpc2	47.774	31.5945	160.724	101.298	1.75386	3.70573e-05
ENSMUSG00000046709	Mapk10	28.8912	26.8471	158.885	136.289	2.4681	3.78888e-05
ENSMUSG00000074923	Pak6	12.5395	3.50695	29.5772	9.49133	1.24215	3.98314e-05
ENSMUSG00000046442	Ppm1e	46.6746	30.561	149.45	86.6076	1.68761	4.0854e-05
ENSMUSG00000021822	Plau	15497.7	623.406	22301.8	612.162	0.530828	4.1216e-05
ENSMUSG00000040964	Arhgef10l	201.615	259.758	291.912	372.299	0.538631	4.25739e-05
ENSMUSG00000032060	Cryab	68.9507	41.1552	116.601	45.0709	0.763701	4.2846e-05
ENSMUSG00000033152	Podxl2	17.9523	15.3919	137.813	123.887	2.94605	4.37716e-05
ENSMUSG00000022340	Sybu	9.58203	4.45514	44.7296	24.647	2.22588	4.41735e-05
ENSMUSG00000034685	Fam171a2	30.748	18.3101	97.9996	74.1496	1.67632	4.48818e-05
ENSMUSG00000015599	Ttbk1	33.4247	30.8555	121.807	104.896	1.87067	4.72451e-05
ENSMUSG00000025006	Sorbs1	185.768	69.6803	366.495	133.848	0.989068	4.72871e-05
ENSMUSG00000023912	Slc25a27	9.57285	9.21954	31.1323	28.7802	1.70659	4.89671e-05
ENSMUSG00000030401	Rtn2	17.2839	54.7541	42.4829	76.1429	1.29984	5.03478e-05
ENSMUSG00000024810	Il33	68.1113	63.942	126.44	87.0186	0.900953	5.08472e-05
ENSMUSG00000029189	Sel1l3	26.5331	13.7461	57.8616	38.8593	1.13005	5.63372e-05
ENSMUSG00000021097	Clmn	306.549	82.1155	462.671	68.2404	0.601749	5.81579e-05
ENSMUSG00000036510	Cdh8	8.61092	2.51077	36.3899	15.6903	2.0789	5.9827e-05
ENSMUSG00000026344	Lypd1	7.8572	8.14973	45.2555	18.8807	2.53873	6.09153e-05
ENSMUSG00000041141	Pnmal1	2.4206	1.11781	13.8452	9.10139	2.53432	6.10372e-05
ENSMUSG00000027030	Stk39	88.8463	78.0293	160.13	91.7777	0.855618	6.22628e-05
ENSMUSG00000068154	Insm1	3.65055	2.71449	13.8637	13.8351	1.93933	6.24912e-05
ENSMUSG00000043099	Hic1	20.0118	14.1045	81.9691	26.7052	2.04195	6.78382e-05
ENSMUSG00000025020	Slit1	67.5589	39.1931	185.507	53.431	1.4604	6.78382e-05
ENSMUSG00000003934	Efnb3	11.2995	13.6501	39.6936	34.6936	1.81061	6.79443e-05
ENSMUSG00000002249	Tead3	24.8877	15.6927	51.4838	29.2069	1.05599	6.8003e-05
ENSMUSG00000000305	Cdh4	32.5129	13.9179	56.2922	28.0934	0.800725	7.8686e-05
ENSMUSG00000016918	Sulf1	184.263	273.996	356.62	316.844	0.959324	8.00822e-05
ENSMUSG00000020086	H2afy2	31.9432	39.9545	144.107	127.211	2.17845	8.037e-05
ENSMUSG00000069874	Irgm2	562.437	1546.64	1529.9	1823.37	1.44951	8.35838e-05
ENSMUSG00000038332	Sesn1	564.152	139.465	823.773	132.52	0.552231	8.43078e-05
ENSMUSG00000057897	Camk2b	35.5856	19.5143	93.2161	70.105	1.39422	9.15453e-05
ENSMUSG00000022475	Hdac7	118.825	111.106	244.658	198.2	1.04465	9.27367e-05
ENSMUSG00000029348	Asphd2	11.3269	5.77667	33.9605	18.767	1.58216	9.54423e-05
ENSMUSG00000033342	Plppr5	5.99902	6.5615	27.8827	26.5036	2.22242	9.67141e-05
ENSMUSG00000010307	Tmem86a	676.04	456.255	1043.33	431.437	0.632098	9.68857e-05
ENSMUSG00000021294	Kif26a	10.7572	7.03955	89.5321	67.9238	3.06102	9.84995e-05
ENSMUSG00000056258	Kcnq3	6.56058	6.07637	35.928	25.7679	2.44869	0.000101779
ENSMUSG00000035863	Palm	222.126	83.9276	383.024	179.153	0.794089	0.000103231
ENSMUSG00000040037	Negr1	15.1815	16.6163	49.0044	65.867	1.69555	0.000105814
ENSMUSG00000069806	Cacng7	75.0138	64.7942	193.931	145.697	1.37739	0.000109065
ENSMUSG00000032702	Kank1	34.5651	37.3467	56.8892	64.7977	0.726559	0.000120644
ENSMUSG00000040265	Dnm3	9.25737	6.05183	51.4958	35.1568	2.47746	0.000122931
ENSMUSG00000026278	Bok	6.5058	2.60785	24.7499	6.32347	1.92681	0.000124756
ENSMUSG00000051790	Nlgn2	255.825	386.251	562.155	458.959	1.14164	0.000126782
ENSMUSG00000109926	Gm45808	2.09695	1.09326	15.4839	17.7062	2.88607	0.000130568
ENSMUSG00000020889	Nr1d1	47.5197	91.1973	73.4748	128.952	0.636774	0.00013299
ENSMUSG00000039741	Bahcc1	156.896	151.354	283.123	217.831	0.854882	0.000136764
ENSMUSG00000051515	Fam181b	27.0184	14.4852	69.6452	34.8143	1.37572	0.000136795
ENSMUSG00000070802	Pnmal2	15.765	6.86038	86.0621	35.9714	2.44961	0.000150082
ENSMUSG00000031955	Bcar1	72.5036	91.6871	161.058	231.573	1.15686	0.000150224
ENSMUSG00000024426	Atat1	172.987	216.227	350.022	303.851	1.02334	0.000153169
ENSMUSG00000038729	Akap2	229.612	312.862	492.362	602.748	1.10785	0.00015392
ENSMUSG00000022332	Khdrbs3	29.5354	31.1879	88.1552	78.0103	1.58461	0.000165333
ENSMUSG00000024968	Rcor2	29.2172	17.621	59.2124	45.3181	1.02217	0.000170337
ENSMUSG00000004892	Bcan	23.9185	17.4813	58.7921	51.6819	1.30936	0.000173293
ENSMUSG00000038777	Sema6c	17.9669	20.4634	87.5293	68.0205	2.29155	0.000174129
ENSMUSG00000066258	Trim12a	474.396	961.541	735.769	975.04	0.640188	0.000191256
ENSMUSG00000024109	Nrxn1	78.9425	50.7612	121.43	114.802	0.626671	0.000197808
ENSMUSG00000027639	Samhd1	7263.29	9253.44	10463.6	11754.9	0.53244	0.000199426
ENSMUSG00000034275	Igsf9b	61.5051	38.747	101.099	77.0303	0.72794	0.000200568
ENSMUSG00000046160	Olig1	93.6783	39.3625	136.621	112.672	0.551273	0.000201519
ENSMUSG00000041688	Amot	40.5999	35.2657	92.2992	72.2088	1.19261	0.000205368
ENSMUSG00000022203	Efs	7.85534	6.52004	29.4724	14.046	1.92345	0.000207151
ENSMUSG00000037989	Wnk2	30.0517	101.234	138.595	126.537	2.21279	0.000207795
ENSMUSG00000033788	Dysf	62.5155	28.8735	120.093	42.7238	0.950078	0.000231505
ENSMUSG00000029377	Ereg	13.5307	1021.04	33.9807	1163.5	1.34058	0.000233903
ENSMUSG00000030376	Slc8a2	16.2275	6.66731	36.8707	20.0232	1.19457	0.000234575
ENSMUSG00000010154	Spire2	3.62316	2.31661	24.9575	9.07598	2.79728	0.000244401
ENSMUSG00000050910	Cdr2l	74.6181	300.941	150.399	268.194	1.01327	0.000244829
ENSMUSG00000066607	6030419C18Rik	18.328	18.195	54.6682	49.448	1.58777	0.00024576
ENSMUSG00000032046	Abhd12	2346.17	1797.73	3460.31	1845.11	0.566547	0.000247698
ENSMUSG00000041592	Sdk2	52.916	40.5005	229.067	181.75	2.12043	0.000252653
ENSMUSG00000015094	Npdc1	71.236	74.8425	167.907	160.063	1.24149	0.000267146
ENSMUSG00000024873	Cnih2	8.89901	6.47205	29.1075	20.4573	1.70865	0.00027175
ENSMUSG00000003352	Cacnb3	44.937	116.384	186.156	199.008	2.05854	0.000274985
ENSMUSG00000025743	Sdc3	17268	9206.43	29046	11465.8	0.756035	0.000283584
ENSMUSG00000021782	Dlg5	110.279	81.1321	267.659	164.922	1.28748	0.000292095
ENSMUSG00000037379	Spon2	2.72332	1.27244	12.7788	2.51249	2.2387	0.000292109
ENSMUSG00000061353	Cxcl12	19.3224	26.2956	94.2699	77.4977	2.29283	0.000294534
ENSMUSG00000031740	Mmp2	120.437	550.509	442.842	640.312	1.88533	0.00029723
ENSMUSG00000020297	Nsg2	60.0793	44.3518	483.012	417.455	3.0127	0.000298733
ENSMUSG00000047562	Mmp10	73.704	146.392	225.321	465.468	1.61979	0.000311377
ENSMUSG00000000901	Mmp11	37.3934	48.4231	89.2783	57.6958	1.25891	0.000313658
ENSMUSG00000045932	Ifit2	1227.55	6609.73	10057.4	8041.63	3.03985	0.000318469
ENSMUSG00000025272	Tro	30.6639	30.1034	127.383	140.658	2.05845	0.000324847
ENSMUSG00000006369	Fbln1	22.9721	6.42406	123.491	41.6067	2.43508	0.000326146
ENSMUSG00000041120	Nbl1	41.1796	49.6284	69.6619	57.255	0.766501	0.000334276
ENSMUSG00000031604	Msmo1	534.276	263.418	842.563	260.918	0.662541	0.000360605
ENSMUSG00000063063	Ctnna2	30.842	33.8694	114.919	108.545	1.9065	0.000365642
ENSMUSG00000032332	Col12a1	312.709	474.546	715.392	543.196	1.19832	0.000378641
ENSMUSG00000036422	Pcdh8	2.34389	0.996182	14.6118	5.88938	2.62797	0.000383434
ENSMUSG00000002578	Ikzf4	9.57744	18.6002	34.8223	36.8946	1.86672	0.000391888
ENSMUSG00000022686	B3gnt5	34.0383	28.4268	73.345	46.4738	1.10728	0.000394681
ENSMUSG00000021047	Nova1	25.5114	30.5962	57.4319	55.53	1.17529	0.000397698
ENSMUSG00000007989	Fzd3	190.272	136.743	337.16	279.968	0.831356	0.000409945
ENSMUSG00000020176	Grb10	180.44	244.444	579.988	582.993	1.69201	0.000414693
ENSMUSG00000068457	Uty	328.707	409.121	501.776	634.517	0.616871	0.000418981
ENSMUSG00000002341	Ncan	1092.85	773.375	2341.99	2129.22	1.1051	0.000438437
ENSMUSG00000075012	Fjx1	20.8989	60.8381	43.8012	104.754	1.06785	0.000441164
ENSMUSG00000027580	Helz2	3249.2	9877.45	6321.75	10699.3	0.965866	0.000445667
ENSMUSG00000049823	Zbtb12	91.8832	90.6833	131.417	134.096	0.523566	0.000452661
ENSMUSG00000003070	Efna2	5.68354	6.29398	21.0178	22.9458	1.8924	0.000464242
ENSMUSG00000030770	Parva	90.4806	83.4572	213.877	128.491	1.25028	0.000489979
ENSMUSG00000060519	Tor3a	2137.27	4614.39	3674.21	5426.06	0.787194	0.000495809
ENSMUSG00000030643	Rab30	19.143	24.7353	50.0317	63.5725	1.39334	0.000516744
ENSMUSG00000048644	Ctxn1	48.6382	45.0505	117.946	106.291	1.28726	0.000545278
ENSMUSG00000040563	Plppr2	49.6778	97.3806	110.571	109.568	1.16341	0.000574659
ENSMUSG00000008658	Rbfox1	97.7371	308.654	180.561	267.87	0.892792	0.000586128
ENSMUSG00000042082	Arsb	592.735	366.711	881.449	454.924	0.577192	0.000597551
ENSMUSG00000042807	Hecw2	13.2198	15.4399	40.8463	41.6268	1.63243	0.000640149
ENSMUSG00000025964	Adam23	19.9479	5.50887	43.9797	29.2726	1.14557	0.000642137
ENSMUSG00000028532	Cachd1	59.9674	49.0617	97.8708	89.456	0.714061	0.000663199
ENSMUSG00000026620	Mark1	39.7118	35.1931	126.232	104.644	1.67648	0.000711106
ENSMUSG00000021198	Unc79	16.1261	11.8689	98.6224	102.991	2.61965	0.000789704
ENSMUSG00000031428	Zcchc18	30.4544	16.0499	82.9502	61.9263	1.45188	0.000789798
ENSMUSG00000045136	Tubb2b	505.415	273.442	1079.58	616.697	1.10024	0.000808591
ENSMUSG00000039057	Myo16	19.6872	18.5362	38.706	40.2875	0.973718	0.000832535
ENSMUSG00000031778	Cx3cl1	105.68	123.765	177.58	139.272	0.75681	0.000839247
ENSMUSG00000041658	Rragb	5.42742	5.47697	19.6544	7.59052	1.87047	0.000844155
ENSMUSG00000026675	Hsd17b7	169.611	137.897	296.728	154.6	0.813175	0.000848049
ENSMUSG00000044022	Pcdhb21	3.53182	4.03492	15.4002	21.0779	2.12249	0.000851783
ENSMUSG00000043587	Pxylp1	20.0273	15.0922	68.735	31.1588	1.78687	0.000861729
ENSMUSG00000020953	Coch	15.5089	11.6237	126.193	49.0031	3.03142	0.000971879
ENSMUSG00000045813	Gm9801	2.09508	1.39296	13.5599	10.3228	2.70848	0.000973515
ENSMUSG00000061751	Kalrn	25.8848	38.0751	139.444	152.226	2.43058	0.000976285
ENSMUSG00000092035	Peg10	86.36	247.928	231.91	890.437	1.43083	0.000978724
ENSMUSG00000049100	Pcdh10	77.0824	54.1143	123.247	91.9553	0.683726	0.000981265
ENSMUSG00000053024	Cntn2	2.40784	0.696482	16.6139	9.356	2.7951	0.000991079
ENSMUSG00000078153	Psme2b	248.558	192.365	392.977	221.585	0.663799	0.00101545
ENSMUSG00000073489	Ifi204	3071.13	7012.03	10046.6	10043	1.71563	0.00103808
ENSMUSG00000018451	6330403K07Rik	6.61994	4.94247	71.5715	48.2726	3.44748	0.00107593
ENSMUSG00000023243	Kcnk5	4.77911	6.80476	15.6908	10.8815	1.72387	0.00110629
ENSMUSG00000040972	Igsf21	6.50666	5.47587	30.2482	31.1043	2.22185	0.0011232
ENSMUSG00000096847	Tmem151b	4.21669	3.85574	28.0691	26.5022	2.7429	0.00114301
ENSMUSG00000036356	Csgalnact1	7.82064	18.2749	20.5757	43.7048	1.4105	0.00114312
ENSMUSG00000063445	Nmral1	168.333	164.244	280.706	207.646	0.745074	0.00119213
ENSMUSG00000000632	Sez6	256.649	83.0084	494.622	341.931	0.950743	0.00120541
ENSMUSG00000010051	Hyal1	321.736	59.0912	610.124	93.5902	0.927294	0.00124424
ENSMUSG00000036902	Neto2	133.183	106.927	208.373	205.61	0.652869	0.00127102
ENSMUSG00000027358	Bmp2	106.561	75.3224	184.862	50.5629	0.804118	0.00127421
ENSMUSG00000031785	Adgrg1	101.608	55.3644	231.742	170.154	1.19508	0.00129574
ENSMUSG00000039278	Pcsk1n	16.7224	13.8528	54.1012	53.1083	1.69296	0.00133346
ENSMUSG00000068196	Col8a1	129.305	162.833	184.397	205.545	0.517834	0.00142249
ENSMUSG00000028005	Gucy1b3	6.28984	5.3308	71.4172	36.7828	3.51022	0.00142376
ENSMUSG00000068740	Celsr2	244.212	139.088	387.008	252.615	0.670353	0.00144173
ENSMUSG00000035413	Tmem98	21.1879	21.0246	43.01	28.1596	1.0307	0.00145176
ENSMUSG00000051910	Sox6	78.7662	61.1902	117.346	92.0948	0.578074	0.00148286
ENSMUSG00000030257	Srgap3	244.928	184.629	433.946	520.715	0.830142	0.00155171
ENSMUSG00000037625	Cldn11	3.55103	1.64467	12.6034	3.26697	1.8306	0.0015632
ENSMUSG00000094910	D430019H16Rik	32.008	23.5174	220.788	186.407	2.79486	0.00156463
ENSMUSG00000067629	Syngap1	88.3464	73.5979	227.323	142.498	1.36654	0.0015929
ENSMUSG00000025608	Podxl	41.1504	71.8316	72.3387	144.223	0.821018	0.00160958
ENSMUSG00000002997	Prkar2b	315.338	380.222	460.88	490.501	0.554905	0.00170242
ENSMUSG00000032507	Fbxl2	72.0089	38.5539	109.837	39.9309	0.612269	0.00172193
ENSMUSG00000003378	Grik5	81.3109	61.248	197	134.691	1.2828	0.00180433
ENSMUSG00000002108	Nr1h3	111.168	126.496	172.886	304.797	0.640505	0.00186331
ENSMUSG00000040183	Ankrd6	23.6158	21.1547	48.2978	44.9704	1.03648	0.00191019
ENSMUSG00000092090	Gm3294	0.588946	0	10.5953	4.71017	4.16611	0.00191019
ENSMUSG00000021913	Ogdhl	21.0057	17.8312	48.5759	41.7255	1.21541	0.00193403
ENSMUSG00000023232	Serinc2	9.55005	12.1356	22.5149	18.9573	1.24166	0.00198545
ENSMUSG00000074577	Ripor3	6.30446	16.5738	17.7736	14.7657	1.50614	0.00200585
ENSMUSG00000094152	Slc6a16	0	0	39.0655	17.7358	7.89072	0.00201073
ENSMUSG00000032537	Ephb1	9.23916	10.9038	41.1551	45.5539	2.15676	0.00205418
ENSMUSG00000042726	Trafd1	1569.14	3038.12	3230.43	3393.38	1.04816	0.0021476
ENSMUSG00000001300	Efnb2	100.497	433.467	252.646	599.311	1.33366	0.00214821
ENSMUSG00000037541	Shank2	12.6664	10.8781	46.0158	45.5196	1.87339	0.00223337
ENSMUSG00000022351	Sqle	516.743	338.949	848.812	291.948	0.72283	0.00230279
ENSMUSG00000034981	Parm1	10.4754	6.47205	25.408	18.9136	1.29503	0.00230574
ENSMUSG00000027525	Phactr3	4.48285	2.59286	28.1267	29.0696	2.6536	0.00234276
ENSMUSG00000029810	Tmem176b	211.389	151.011	368.519	292.062	0.808839	0.00242718
ENSMUSG00000030209	Grin2b	4.77639	8.8942	70.1733	75.7196	3.88166	0.00245574
ENSMUSG00000046718	Bst2	3226.31	10640.1	7579.33	12315.2	1.23788	0.00253701
ENSMUSG00000052516	Robo2	72.5517	64.1054	342.348	363.744	2.24644	0.00260834
ENSMUSG00000021464	Ror2	20.2268	11.2525	73.2543	34.0142	1.86251	0.00264312
ENSMUSG00000027797	Dclk1	252.335	153.894	530.294	382.787	1.07807	0.00264395
ENSMUSG00000028613	Lrp8	404.484	368.666	573.308	485.712	0.509508	0.00265177
ENSMUSG00000030806	Stx1b	26.2862	22.4871	124.906	97.8066	2.25544	0.00266146
ENSMUSG00000049036	Tmem121	2.65392	6.26943	12.8534	8.09976	2.27012	0.00267879
ENSMUSG00000019899	Lama2	38.2832	22.1168	123.305	64.935	1.69359	0.00271829
ENSMUSG00000037138	Aff3	19.1193	20.0358	64.1266	69.134	1.75273	0.00271943
ENSMUSG00000038552	Fndc4	24.3486	20.7131	54.2734	45.7141	1.1599	0.00272463
ENSMUSG00000019990	Pde7b	359.658	322.721	677.535	361.888	0.919705	0.00277653
ENSMUSG00000005514	Por	2357.37	3207.21	3492.63	3782.07	0.572232	0.00280102
ENSMUSG00000034245	Hdac11	9.60941	9.23453	25.4458	22.4352	1.41031	0.00281499
ENSMUSG00000019539	Rcn3	95.416	77.1943	276.749	156.163	1.54207	0.00283659
ENSMUSG00000032064	Dixdc1	18.4984	12.6551	59.8578	37.0247	1.69436	0.00287762
ENSMUSG00000028524	Sgip1	17.9998	14.7456	73.2159	54.94	2.03084	0.00295927
ENSMUSG00000040591	1110051M20Rik	121.899	122.245	183.934	125.889	0.602658	0.00297172
ENSMUSG00000039908	Slc26a11	83.3553	107.147	150.61	112.041	0.856851	0.00302181
ENSMUSG00000073591	Pcdhb22	23.3724	21.5918	54.2957	54.1507	1.22554	0.00318259
ENSMUSG00000093930	Hmgcs1	1219.61	634.531	2097.61	579.292	0.788378	0.00323786
ENSMUSG00000015653	Steap2	53.6155	80.5627	128.692	188.302	1.27427	0.00323836
ENSMUSG00000041144	Dnah7b	6.58797	6.90403	19.3453	11.9582	1.56663	0.00323851
ENSMUSG00000026946	Nmi	319.286	619.483	580.796	761.405	0.870468	0.00325334
ENSMUSG00000043670	Diras1	2.3978	1.62013	11.4495	5.31248	2.2582	0.00331348
ENSMUSG00000017943	Gdap1l1	10.4572	9.66432	66.8708	61.7506	2.6852	0.00335809
ENSMUSG00000023391	Dlx2	22.0877	24.9357	123.069	113.238	2.48059	0.00338401
ENSMUSG00000062515	Fabp4	912.659	101.813	1314.15	102.289	0.533457	0.00341438
ENSMUSG00000078302	Foxd1	8.63372	25.2365	40.8851	21.2024	2.24923	0.00348556
ENSMUSG00000030102	Itpr1	912.578	627.05	1318.76	774.38	0.537086	0.00360348
ENSMUSG00000024743	Syt7	11.379	1215.34	44.6588	1513.15	1.97751	0.00361931
ENSMUSG00000050822	Slc29a4	4.49561	5.64006	41.1291	38.7165	3.2052	0.00362142
ENSMUSG00000033436	Armcx2	115.522	140.39	239.328	202.768	1.05849	0.00362142
ENSMUSG00000021087	Rtn1	147.343	88.1673	377.883	286.551	1.36476	0.00370796
ENSMUSG00000022548	Apod	10.9987	12.0535	43.6614	18.3587	1.98791	0.0037083
ENSMUSG00000013419	Zfp651	30.2485	31.7726	65.3349	63.1187	1.11664	0.00387658
ENSMUSG00000031990	Jam3	29.3405	27.681	53.6928	48.049	0.883082	0.00397903
ENSMUSG00000053080	2700081O15Rik	107.404	146.45	246.959	218.896	1.20526	0.00403325
ENSMUSG00000032101	Ddx25	2.70138	3.54105	13.8918	19.0376	2.37385	0.00436573
ENSMUSG00000050064	Zfp697	51.3889	45.333	91.6437	99.4265	0.840932	0.00446046
ENSMUSG00000033781	Asb13	133.218	74.7615	246.936	107.365	0.893694	0.00446128
ENSMUSG00000041559	Fmod	18.2377	8.07719	50.7114	17.7452	1.48434	0.00453379
ENSMUSG00000038486	Sv2a	21.9129	12.5165	70.0652	45.716	1.68226	0.00453379
ENSMUSG00000032890	Rims3	49.8937	300.546	92.8225	405.471	0.899617	0.00454511
ENSMUSG00000075254	Heg1	215.356	516.042	340.359	419.769	0.666678	0.00499034
ENSMUSG00000028546	Elavl4	7.43762	16.8735	41.9086	61.4302	2.49473	0.00499995
ENSMUSG00000032470	Mras	142.875	445.552	202.477	391.983	0.507964	0.00506512
ENSMUSG00000025498	Irf7	2238.21	11239.5	11976.9	17062.7	2.42526	0.00509692
ENSMUSG00000021010	Npas3	40.2282	40.6944	67.1794	69.2754	0.745414	0.00536761
ENSMUSG00000043460	Elfn2	3.59577	7.6624	12.9409	24.9472	1.85161	0.00539212
ENSMUSG00000034520	Gjc1	17.1027	21.5013	40.3309	47.4557	1.24489	0.00573162
ENSMUSG00000039546	Ajap1	4.19748	2.90755	14.2388	5.93163	1.77486	0.00587732
ENSMUSG00000044365	Cxxc4	4.19475	7.25173	42.6227	62.3054	3.35122	0.00591521
ENSMUSG00000026825	Dnm1	24.5311	26.4162	79.3964	50.4093	1.69914	0.00603482
ENSMUSG00000002808	Epdr1	37.2136	26.3851	85.2993	50.0484	1.20279	0.00611637
ENSMUSG00000096056	Gm21986	19.5109	12.4843	40.398	11.7106	1.0562	0.00614579
ENSMUSG00000056592	Zfp658	185.055	483.273	265.235	604.126	0.525647	0.0061713
ENSMUSG00000066800	Rnasel	1599.59	674.393	2320.78	527.067	0.542212	0.00630343
ENSMUSG00000040867	Begain	5.32791	5.00655	39.9641	40.2165	2.90334	0.0064326
ENSMUSG00000020701	Tmem132e	5.37537	7.129	20.4491	28.1779	1.93142	0.00653928
ENSMUSG00000020598	Nrcam	389.56	331.766	780.593	615.621	1.00883	0.00663659
ENSMUSG00000037071	Scd1	886.793	154.903	1293.09	190.178	0.550811	0.00671703
ENSMUSG00000027849	Syt6	11.0489	3.19226	83.2587	52.607	2.92137	0.00675018
ENSMUSG00000032625	Thsd7a	24.9668	32.1353	66.4369	58.2309	1.4143	0.00683353
ENSMUSG00000007021	Syngr3	8.70313	6.95093	29.059	27.3042	1.75108	0.00692994
ENSMUSG00000086717	Gm15655	278.674	309.325	465.978	499.751	0.748426	0.00708
ENSMUSG00000060550	H2-Q7	215.713	4248.81	471.659	7497.72	1.13394	0.00718906
ENSMUSG00000061524	Zic2	30.0622	18.9299	94.2822	50.3237	1.65385	0.00742139
ENSMUSG00000054667	Irs4	5.34253	2.83502	19.0225	21.0248	1.83208	0.00767076
ENSMUSG00000047959	Kcna3	237.462	598.276	415.854	668.666	0.814823	0.00778574
ENSMUSG00000023832	Acat2	182.585	73.9091	326.06	80.7628	0.844274	0.00788629
ENSMUSG00000030584	Dpf1	11.3717	11.0584	59.0912	50.3726	2.38238	0.00794758
ENSMUSG00000026676	Ccdc3	9.88833	21.54	31.3596	26.6596	1.6697	0.00803372
ENSMUSG00000030350	Prmt8	0.879763	0.324245	17.4955	7.66756	4.30029	0.00841812
ENSMUSG00000023032	Slc4a8	27.5243	17.474	78.5986	64.4313	1.52049	0.00851514
ENSMUSG00000046844	Vat1l	39.605	12.2242	64.7862	29.0053	0.720648	0.00868793
ENSMUSG00000024598	Fbn2	53.8971	51.29	174.88	156.976	1.7068	0.00872526
ENSMUSG00000002265	Peg3	108.09	59.0293	483.159	352.615	2.16655	0.00926386
ENSMUSG00000043635	Adamts3	5.08183	2.94165	21.3194	17.1039	2.07884	0.00945189
ENSMUSG00000030302	Atp2b2	4.78097	3.81621	48.0645	34.9515	3.33669	0.0094693
ENSMUSG00000027603	Ggt7	15.8554	11.8765	49.4001	35.2484	1.64316	0.00948947
ENSMUSG00000050994	Adgb	113.083	1201.33	159.471	2488.56	0.504038	0.00955685
ENSMUSG00000074794	Arrdc3	469.954	203.651	730.183	272.782	0.642072	0.00956207
ENSMUSG00000022623	Shank3	13.4594	10.9379	59.3985	37.9953	2.14809	0.009605
ENSMUSG00000019851	Perp	130.02	17.9613	241.883	21.5468	0.903463	0.00996158
ENSMUSG00000062044	Lmtk3	19.6717	22.3908	110.774	98.9144	2.49902	0.0102681
ENSMUSG00000022816	Fstl1	423.809	1529.34	947.939	1186.89	1.16867	0.0107375
ENSMUSG00000054196	Cthrc1	43.3341	14.0469	153.44	30.923	1.82896	0.0108172
ENSMUSG00000022098	Bmp1	252.967	633.874	531.353	1032.85	1.07888	0.0108681
ENSMUSG00000035104	Eva1a	33.7301	10.0377	56.114	11.6561	0.736073	0.0109125
ENSMUSG00000026586	Prrx1	118.332	216.438	312.471	482.169	1.40869	0.0113853
ENSMUSG00000023206	Il15ra	99.6664	195.865	155.877	371.042	0.650435	0.0113951
ENSMUSG00000007888	Crlf1	75.1499	91.1696	126.4	139.493	0.758958	0.011568
ENSMUSG00000046192	Iqub	8.9958	2.74639	20.9598	20.9572	1.22814	0.0116063
ENSMUSG00000027656	Wisp2	1.81158	7.85003	13.7051	13.7143	2.94433	0.0117318
ENSMUSG00000025555	Farp1	171.86	162.466	325.093	329.882	0.925957	0.0117631
ENSMUSG00000039607	Rbms3	34.5871	49.8171	82.6608	117.086	1.26293	0.0118332
ENSMUSG00000063632	Sox11	103.249	145.791	793.369	941.805	2.94821	0.0119037
ENSMUSG00000059493	Nhs	14.4251	39.6641	34.6778	62.7978	1.27645	0.0122096
ENSMUSG00000032011	Thy1	108.642	38.7557	289.716	87.0732	1.4196	0.0124664
ENSMUSG00000038370	Pcp4l1	142.442	57.4296	268.079	70.2149	0.917237	0.0125674
ENSMUSG00000038807	Rap1gap2	149.233	151.807	220.364	225.534	0.571693	0.0128647
ENSMUSG00000026163	Sphkap	0.29813	0	12.2495	1.63348	5.25554	0.013117
ENSMUSG00000042810	Krba1	64.1055	51.3764	96.0906	74.7086	0.588389	0.0131276
ENSMUSG00000044734	Serpinb1a	114.369	27.6736	227.277	38.0136	0.998785	0.0133914
ENSMUSG00000029126	Nsg1	58.4124	45.0047	314.493	257.904	2.43394	0.0137177
ENSMUSG00000028444	Cntfr	14.0329	13.5435	93.3786	84.1445	2.73776	0.0137205
ENSMUSG00000057554	Lgals8	2332.49	2978.63	3297.41	3080.68	0.504955	0.0137607
ENSMUSG00000029366	Dck	1307.96	755.832	2274.69	1019.29	0.805024	0.014027
ENSMUSG00000074634	Tmem267	81.9675	58.9033	148.496	87.4904	0.861694	0.0141897
ENSMUSG00000028360	Slc44a5	5.69816	1.36952	22.9512	19.778	2.01239	0.0145285
ENSMUSG00000074578	Zfas1	295.083	436.95	446.722	419.854	0.605509	0.0147908
ENSMUSG00000020707	Rnf135	170.029	315.318	270.523	459.674	0.672545	0.0150844
ENSMUSG00000031169	Porcn	29.6367	38.8313	52.3005	44.2507	0.828225	0.0152443
ENSMUSG00000056553	Ptprn2	3.94136	3.71067	21.3827	21.193	2.46202	0.0162333
ENSMUSG00000044548	Dact1	6.48659	11.5522	29.7003	44.0148	2.18911	0.0163244
ENSMUSG00000029287	Tgfbr3	34.3994	28.5526	115.325	64.5379	1.75334	0.0163292
ENSMUSG00000014303	Glis2	50.8292	59.7618	82.5515	90.2904	0.703134	0.0164244
ENSMUSG00000041670	Rims1	3.58387	3.48351	18.6444	22.7922	2.38312	0.0165092
ENSMUSG00000035277	Arx	18.2358	18.0799	91.8934	76.7058	2.34018	0.0169362
ENSMUSG00000090061	Nwd2	3.92129	3.45896	15.2211	14.9231	1.96864	0.0180324
ENSMUSG00000057596	Trim30d	885.911	2842.3	2133.2	2924.07	1.27404	0.0181722
ENSMUSG00000022464	Slc38a4	24.1481	12.733	52.0896	25.9347	1.12065	0.0183471
ENSMUSG00000047878	A4galt	10.4572	72.6857	29.9239	86.5724	1.52718	0.0193387
ENSMUSG00000060882	Kcnd2	3.57842	3.63814	34.033	20.7815	3.25567	0.0195711
ENSMUSG00000032014	Oaf	122.762	107.145	184.722	223.867	0.599378	0.0196416
ENSMUSG00000031349	Nsdhl	285.196	179.598	403.418	178.898	0.50654	0.019711
ENSMUSG00000049734	Trex1	607.159	1263.38	1669.3	1726.92	1.46428	0.0200359
ENSMUSG00000010064	Slc38a3	61.4932	14.6218	89.2572	29.8368	0.545839	0.0202079
ENSMUSG00000043263	Ifi209	1777.83	4518.66	6476.05	6456.09	1.87053	0.0202809
ENSMUSG00000000915	Hip1r	57.4555	73.0399	94.2681	114.401	0.727723	0.0204537
ENSMUSG00000002020	Ltbp2	139.277	162.047	347.227	481.458	1.32696	0.02058
ENSMUSG00000048895	Cdk5r1	28.6328	68.089	222.84	240.875	2.96378	0.0209444
ENSMUSG00000042010	Acacb	16.7644	14.8746	37.3405	24.7663	1.16544	0.020959
ENSMUSG00000111063	AC125374.1	5.09918	4.77939	14.8612	14.4139	1.55237	0.0211128
ENSMUSG00000056673	Kdm5d	317.99	295.049	516.672	456.791	0.706327	0.0211297
ENSMUSG00000079334	Nat6	555.771	344.494	886.608	336.179	0.679225	0.021289
ENSMUSG00000044337	Ackr3	20.9125	77.9751	38.7557	107.899	0.899652	0.0215887
ENSMUSG00000023367	Tmem176a	96.7851	58.6728	184.744	108.622	0.94055	0.0220153
ENSMUSG00000020704	Asic2	4.78643	2.11399	18.8119	17.5803	1.98649	0.0224759
ENSMUSG00000026042	Col5a2	575.828	555.25	1484.48	1294.49	1.37262	0.0225928
ENSMUSG00000070000	Fcho1	93.1519	51.1899	188.122	110.519	1.02023	0.0226221
ENSMUSG00000074364	Ehd2	85.6202	68.7844	204.596	138.281	1.26235	0.0229302
ENSMUSG00000048251	Bcl11b	11.4465	14.7829	264.169	227.713	4.54313	0.0230387
ENSMUSG00000009216	Fam163b	2.71873	1.81429	47.7701	21.2151	4.15188	0.0237861
ENSMUSG00000050558	Prokr2	6.30719	3.66158	67.8408	52.1287	3.43774	0.0238559
ENSMUSG00000034173	Zbed5	26.9636	98.3579	58.4382	89.1812	1.12751	0.0240231
ENSMUSG00000061603	Akap6	84.6342	90.2879	175.249	177.817	1.05846	0.0242062
ENSMUSG00000045095	Magi1	163.584	187.064	246.206	213.566	0.594013	0.0243187
ENSMUSG00000052613	Pcdh15	3.24831	4.45514	13.1254	11.8337	2.01814	0.0248731
ENSMUSG00000026080	Chst10	12.9198	6.34307	33.3677	21.2903	1.37284	0.0250443
ENSMUSG00000033209	Ttc28	206.471	159.981	315.105	217.677	0.615921	0.0252511
ENSMUSG00000074637	Sox2	147.353	133.352	238.627	252.936	0.697914	0.0252937
ENSMUSG00000030882	Dnhd1	23.861	25.4925	58.946	53.2844	1.30605	0.0255639
ENSMUSG00000032186	Tmod2	167.447	99.4431	339.031	284.093	1.02403	0.0256184
ENSMUSG00000008999	Bmp7	6.92625	6.72376	34.2534	30.9249	2.3178	0.0256984
ENSMUSG00000026259	Ngef	9.20445	7.84267	29.4019	17.4041	1.68075	0.0260336
ENSMUSG00000022015	Tnfsf11	2.6813	7.32426	20.2756	18.976	2.91898	0.0262317
ENSMUSG00000013367	Iglon5	28.158	29.729	62.2138	66.878	1.14833	0.026246
ENSMUSG00000040613	Apobec1	3598.34	2501.35	5514.07	3006.18	0.621312	0.0266275
ENSMUSG00000021318	Gli3	58.963	58.8948	104.987	88.989	0.836101	0.0269834
ENSMUSG00000021699	Pde4d	118.081	143.941	169.296	141.707	0.530515	0.0272819
ENSMUSG00000069378	Prdm6	1.78419	3.33734	10.4854	12.1908	2.56073	0.0272819
ENSMUSG00000000957	Mmp14	421.448	3794.51	635.644	5262.6	0.598384	0.027323
ENSMUSG00000020023	Tmcc3	1022.42	915.04	1476.38	1184.72	0.534991	0.0276108
ENSMUSG00000038128	Camk4	12.2569	9.4958	73.7269	86.0969	2.59235	0.0279312
ENSMUSG00000047085	Lrrc4b	48.945	26.8471	135.881	111.323	1.48015	0.0283752
ENSMUSG00000051435	Fhad1	7.43948	7.33925	22.927	10.5004	1.62485	0.0288841
ENSMUSG00000039115	Itga9	48.5035	420.21	104.909	716.714	1.11955	0.0292877
ENSMUSG00000049804	Armcx4	44.8831	116.095	181.625	218.951	2.02121	0.0294613
ENSMUSG00000048899	Rimkla	3.01686	1.7663	21.2973	17.6573	2.83013	0.0308478
ENSMUSG00000039347	Atp6v0e2	66.8959	52.4877	117.547	102.645	0.821261	0.031531
ENSMUSG00000024529	Lox	193.543	11722.9	672.567	10626.2	1.80598	0.0316314
ENSMUSG00000031616	Ednra	23.0095	32.5907	99.9945	41.3849	2.12556	0.0333532
ENSMUSG00000041245	Wnk3	17.8821	19.4663	58.5742	49.8929	1.71666	0.0339147
ENSMUSG00000055373	Fut9	22.2695	24.1187	67.5861	62.7324	1.6072	0.0340759
ENSMUSG00000024268	Celf4	28.7597	31.7235	220.2	205.028	2.94452	0.0341373
ENSMUSG00000049184	Purg	39.7291	36.9338	67.3579	60.5855	0.769408	0.0341942
ENSMUSG00000064080	Fbln2	424.392	568.374	1626.86	1477.41	1.94371	0.0344686
ENSMUSG00000031398	Plxna3	127.137	106.553	207.349	177.225	0.713528	0.0350561
ENSMUSG00000036972	Zic4	9.24274	4.4328	28.291	11.4109	1.61111	0.0351319
ENSMUSG00000029581	Fscn1	252.466	299.625	594.021	751.66	1.23936	0.0358043
ENSMUSG00000034258	Mfsd7c	185.888	129.591	332.633	163.355	0.844559	0.0359748
ENSMUSG00000025738	Fbxl16	28.5511	17.9848	74.2376	59.9208	1.38499	0.0360678
ENSMUSG00000057143	Trim12c	430.071	793.738	627.363	732.184	0.549787	0.0374532
ENSMUSG00000001435	Col18a1	432.292	471.619	692.021	538.18	0.68491	0.0381223
ENSMUSG00000035929	H2-Q4	1047.06	5177.48	1720.69	6979.34	0.722228	0.0383346
ENSMUSG00000020866	Cacna1g	5.95973	9.33162	41.4943	48.2153	2.80771	0.0384565
ENSMUSG00000030306	Tmtc1	15.8399	10.9528	34.8516	15.5583	1.14464	0.0394406
ENSMUSG00000004655	Aqp1	36.5584	24.3374	120.968	25.0904	1.7318	0.0405736
ENSMUSG00000002771	Grin2d	11.615	15.9018	32.0192	38.2739	1.47192	0.0411231
ENSMUSG00000025104	Hdgfl3	159.185	110.188	282.147	241.084	0.830492	0.0414755
ENSMUSG00000054252	Fgfr3	66.9344	31.1252	103.052	60.7161	0.630552	0.0417083
ENSMUSG00000033676	Gabrb3	51.9916	27.6736	161.917	108.195	1.64493	0.0418606
ENSMUSG00000028358	Zfp618	34.1835	30.0448	90.6366	109.062	1.41813	0.0422044
ENSMUSG00000041073	Nacad	18.0062	16.1705	78.3039	55.5775	2.12859	0.0423074
ENSMUSG00000037003	Tns2	25.4292	22.6916	80.5239	49.0064	1.67279	0.04299
ENSMUSG00000033419	Snap91	14.0703	10.9016	92.7032	78.5248	2.72402	0.0451811
ENSMUSG00000042757	Tmem108	30.8475	13.231	72.3617	37.8197	1.2373	0.04524
ENSMUSG00000032324	Tspan3	678.43	2082.8	1341.58	2553.72	0.988587	0.0456024
ENSMUSG00000044288	Cnr1	3.28029	4.13936	19.5616	14.8607	2.57859	0.0459106
ENSMUSG00000023017	Asic1	27.1467	25.324	48.1584	46.8604	0.828432	0.0459234
ENSMUSG00000050295	Foxc1	25.1722	39.8359	91.1299	76.8715	1.86002	0.047346
ENSMUSG00000020717	Pecam1	8.70226	33.6104	29.1068	118.783	1.75415	0.0478819
ENSMUSG00000031290	Lrch2	24.1882	22.8708	87.0139	90.8385	1.85373	0.0480261
ENSMUSG00000064125	Prr36	13.38	17.6349	78.5111	49.2301	2.5551	0.0486489
ENSMUSG00000024548	Setbp1	47.4475	44.0233	160.208	129.225	1.75846	0.0493613
ENSMUSG00000045062	Pcdhb7	1.76956	2.21953	12.9576	11.5993	2.86973	0.049547
ENSMUSG00000063239	Grm4	2.06769	0.599401	24.0457	17.3458	3.5356	0.0498087
ENSMUSG00000050248	Evc2	41.7228	37.2569	69.9308	52.4294	0.748347	0.0499507
ENSMUSG00000079056	Kcnip3	14.4305	9.12246	35.4948	37.2864	1.31022	0.0501766
ENSMUSG00000043259	Fam13c	5.75753	7.85223	21.8121	27.0843	1.93444	0.0507049
ENSMUSG00000034353	Ramp1	158.618	10.1102	252.091	14.7986	0.67861	0.0511186
ENSMUSG00000097451	Rian	58.2558	43.0999	210.434	143.447	1.86259	0.0522409
ENSMUSG00000032066	Bco2	30.5046	42.8555	93.7743	81.5958	1.62744	0.053051
ENSMUSG00000034575	Papd7	811.552	1012.62	1145.37	1163.68	0.503403	0.053051
ENSMUSG00000038146	Notch3	56.1826	28.1951	99.1819	40.4913	0.825318	0.0537937
ENSMUSG00000040570	Rundc3b	3.28029	3.91329	14.7403	10.9125	2.16357	0.0544773
ENSMUSG00000033763	Mtss1l	241.981	224.656	374.266	426.482	0.636454	0.0548838
ENSMUSG00000009681	Bcr	166.476	308.656	286.646	381.568	0.787585	0.0550177
ENSMUSG00000040605	Bace2	8.55701	3.03873	26.8384	4.83279	1.64863	0.0552018
ENSMUSG00000025318	Jph3	15.0076	8.3289	48.1731	40.061	1.68454	0.0554109
ENSMUSG00000024304	Cdh2	353.846	525.387	530.442	813.806	0.590672	0.056181
ENSMUSG00000047910	Pcdhb16	2.9922	3.11127	30.0882	29.9247	3.33458	0.0564795
ENSMUSG00000056870	Gulp1	8.63558	8.00466	25.4156	14.8681	1.56634	0.0569658
ENSMUSG00000038665	Dgki	47.1128	26.0846	75.0905	52.2701	0.671655	0.0570765
ENSMUSG00000067889	Sptbn2	37.8824	30.5577	119.096	98.9092	1.66207	0.057164
ENSMUSG00000050737	Ptges	150.165	5530.41	261.602	10387.2	0.806898	0.059862
ENSMUSG00000027950	Chrnb2	69.7685	89.5925	111.791	114.256	0.685087	0.0604829
ENSMUSG00000048852	Gm12185	32.297	22.1413	62.7472	32.1571	0.962311	0.0607365
ENSMUSG00000024180	Tmem8	135.737	130.553	357.791	168.344	1.40235	0.0613476
ENSMUSG00000034987	Hrh2	19.4338	14.6229	36.7271	26.9307	0.922683	0.0616283
ENSMUSG00000015377	Dennd6b	36.9776	50.9147	102.625	116.181	1.47618	0.0635136
ENSMUSG00000097023	Mir9-3hg	35.2317	22.9261	74.1255	58.5846	1.079	0.0662561
ENSMUSG00000060534	Dcc	3.91125	6.90184	40.665	42.5622	3.39205	0.0692374
ENSMUSG00000050199	Lgr4	87.4346	96.3343	124.906	87.7417	0.52215	0.0693509
ENSMUSG00000029780	Nt5c3	169.17	329.067	265.324	434.791	0.654918	0.0701016
ENSMUSG00000031024	St5	88.0527	155.693	125.623	188.504	0.515645	0.0716195
ENSMUSG00000051243	Islr2	7.72384	8.93593	138.426	102.189	4.16309	0.0728491
ENSMUSG00000016346	Kcnq2	6.06111	5.90675	74.1	70.0116	3.62775	0.0734445
ENSMUSG00000079157	Fam155a	4.21755	1.99346	18.8944	18.4922	2.16995	0.0744235
ENSMUSG00000016179	Camk1g	2.70138	2.39024	16.8992	16.4227	2.64812	0.0749684
ENSMUSG00000032262	Elovl4	11.3982	15.4399	32.5866	48.5249	1.52544	0.0749684
ENSMUSG00000026390	Marco	3411.17	49203.7	5492.97	26487.9	0.693851	0.0752008
ENSMUSG00000021066	Atl1	23.6478	27.2204	55.7107	43.4722	1.24728	0.0752681
ENSMUSG00000040690	Col16a1	85.1984	65.2677	229.5	110.784	1.437	0.0756049
ENSMUSG00000030854	Ptpn5	9.26655	8.5626	29.8571	29.5037	1.68711	0.075618
ENSMUSG00000031434	Morc4	39.247	33.8973	63.3026	40.1249	0.698016	0.0757852
ENSMUSG00000040537	Adam22	59.6118	37.7424	132.934	93.5451	1.16163	0.0779582
ENSMUSG00000027230	Creb3l1	213.146	250.23	335.726	282.104	0.661221	0.078066
ENSMUSG00000033981	Gria2	64.9022	53.8199	360.791	337.057	2.48096	0.0783605
ENSMUSG00000020108	Ddit4	85.8357	327.799	163.179	448.133	0.935847	0.0784884
ENSMUSG00000058589	Anks1b	13.1814	16.0788	67.5162	56.9065	2.36468	0.0785614
ENSMUSG00000036256	Igfbp7	73.7109	401.147	164.819	1135.01	1.16406	0.0788437
ENSMUSG00000020135	Apc2	90.0543	45.8046	375.16	247.327	2.06445	0.0791609
ENSMUSG00000039860	Srrm3	1.79423	1.22335	24.2975	20.0138	3.75977	0.0805894
ENSMUSG00000046449	C77370	9.84359	16.4522	46.2135	44.7016	2.23536	0.0805894
ENSMUSG00000051527	Usp29	3.59577	1.96892	34.3875	29.5808	3.26539	0.0808794
ENSMUSG00000038235	F11r	248.53	672.36	406.996	654.77	0.717133	0.0810057
ENSMUSG00000036412	Arsi	9.82352	4.05946	32.1017	4.48843	1.70993	0.0814454
ENSMUSG00000024176	Sox8	17.9304	27.2193	39.1395	58.5438	1.1358	0.0819336
ENSMUSG00000032531	Amotl2	81.6077	123.495	209.214	336.452	1.35963	0.0823013
ENSMUSG00000051375	Pcdh1	75.3795	77.5622	117.9	128.776	0.654596	0.0835069
ENSMUSG00000051367	Six1	15.229	89.3481	40.6631	126.303	1.42815	0.0840338
ENSMUSG00000053550	Shisa7	2.66668	0.2997	40.4858	19.8108	3.92244	0.0841566
ENSMUSG00000013523	Bcas1	11.9661	6.14045	44.1991	31.2486	1.89714	0.0856121
ENSMUSG00000039601	Rcan2	36.7242	12.1942	82.2583	33.5928	1.165	0.0875478
ENSMUSG00000045094	Arhgef37	43.6367	13.6662	77.3342	11.6796	0.832626	0.0876003
ENSMUSG00000021986	Amer2	26.5879	28.0619	129.495	114.909	2.29108	0.0884874
ENSMUSG00000024253	Dync2li1	30.7708	31.1656	51.8141	41.2163	0.756847	0.0908773
ENSMUSG00000028341	Nr4a3	19.1348	88.6699	53.99	59.7802	1.50142	0.0911162
ENSMUSG00000023473	Celsr3	203.304	226.714	386.013	367.74	0.932243	0.0912565
ENSMUSG00000078350	Smim1	48.0373	12.2242	84.2025	12.7677	0.812388	0.091395
ENSMUSG00000004730	Adgre1	4189.47	47889.9	6258.78	42250	0.585134	0.0917411
ENSMUSG00000039252	Lgi2	19.9734	7.25173	83.0559	28.4618	2.06145	0.093376
ENSMUSG00000031963	Bmper	14.824	18.7699	41.3859	58.7035	1.48569	0.0943097
ENSMUSG00000054203	Ifi205	238.253	2488.42	1462.16	6858.51	2.62381	0.0955687
ENSMUSG00000071862	Lrrtm2	8.08134	10.9272	27.9347	29.8133	1.79639	0.0960233
ENSMUSG00000033569	Adgrb3	16.1261	11.213	39.5633	27.3464	1.29949	0.0962
ENSMUSG00000060206	Zfp462	112.111	131.467	325.697	392.692	1.54442	0.0978645
ENSMUSG00000038527	C1rl	118.614	98.6039	169.592	142.014	0.522721	0.0985012
ENSMUSG00000020122	Egfr	95.7757	193.581	170.123	266.463	0.83304	0.0998413
ENSMUSG00000070425	Xntrpc	5.04168	21.3221	20.7101	25.8389	2.03796	0.0998766
ENSMUSG00000106734	Gm20559	904.566	2276.25	1647.68	2021.84	0.871048	0.101235
ENSMUSG00000033948	Zswim5	21.302	29.3652	39.4065	48.3365	0.895773	0.101597
ENSMUSG00000031375	Bgn	596.385	472.364	2269.03	1513.95	1.9334	0.109548
ENSMUSG00000061859	Patj	6.22961	6.25444	18.0865	8.9111	1.54587	0.109805
ENSMUSG00000046387	Pcdhb17	6.00633	10.363	37.7636	40.2165	2.6661	0.11006
ENSMUSG00000027322	Siglec1	9625.92	19214.7	26754.3	25979.3	1.48056	0.110124
ENSMUSG00000031561	Tenm3	180.211	120.834	275.213	174.225	0.614785	0.110862
ENSMUSG00000027273	Snap25	5.65343	6.54569	60.0823	45.685	3.4133	0.111524
ENSMUSG00000030411	Nova2	35.0295	39.9895	199.416	157.023	2.51508	0.111643
ENSMUSG00000044912	Syt16	2.09508	2.34115	10.7297	10.0006	2.362	0.111684
ENSMUSG00000000753	Serpinf1	263.352	205.546	1067.48	666.4	2.02468	0.112468
ENSMUSG00000025017	Pik3ap1	3909.55	6701.06	5841.15	8009.53	0.585024	0.11313
ENSMUSG00000047844	Bex4	3.85188	3.33734	14.1008	11.4565	1.86913	0.113634
ENSMUSG00000042401	Crtac1	14.8286	4.87647	67.4195	26.2951	2.18277	0.115006
ENSMUSG00000055717	Slain1	29.859	22.6256	98.4795	52.4148	1.72586	0.115074
ENSMUSG00000097855	A930007I19Rik	308.827	448.862	459.232	621.772	0.577081	0.115744
ENSMUSG00000049532	Sall2	88.4733	79.5783	146.446	119.807	0.734124	0.116801
ENSMUSG00000036381	P2ry14	601.769	597.51	1088.58	791.662	0.860949	0.117002
ENSMUSG00000032368	Zic1	45.0761	50.4296	187.852	131.126	2.0667	0.117785
ENSMUSG00000032503	Arpp21	6.24968	6.32808	43.9705	50.6183	2.81325	0.118491
ENSMUSG00000000693	Loxl3	90.9414	49.1119	210.826	72.3549	1.21629	0.119308
ENSMUSG00000059674	Cdh24	16.1782	40.4481	36.9359	54.6177	1.19748	0.12079
ENSMUSG00000079055	Slc8a3	5.0672	4.68231	15.471	11.4785	1.60933	0.123053
ENSMUSG00000034780	B3galt1	9.89292	10.1347	38.2636	34.3492	1.95953	0.123195
ENSMUSG00000028519	Dab1	14.0055	12.9141	71.3738	60.9261	2.35415	0.1265
ENSMUSG00000048040	Arxes2	12.214	7.07255	34.2958	30.4137	1.49195	0.126904
ENSMUSG00000041609	Bicdl1	24.5421	30.3966	48.3013	34.7354	0.987738	0.127725
ENSMUSG00000029641	Rasl11a	45.0794	24.093	90.8824	35.8925	1.02266	0.128958
ENSMUSG00000031327	Chic1	12.7829	15.4175	28.5036	33.9941	1.15693	0.130151
ENSMUSG00000027339	Rassf2	620.943	481.008	984.687	899.953	0.670448	0.130184
ENSMUSG00000053046	Brsk2	8.08134	2.44669	34.1322	27.7599	2.08424	0.13139
ENSMUSG00000017386	Traf4	57.6697	65.9523	123.45	120.307	1.10169	0.133665
ENSMUSG00000022261	Sdc2	97.8653	93.2952	195.765	180.737	1.00474	0.134222
ENSMUSG00000033295	Ptprf	227.481	249.378	452.139	405.372	0.996505	0.135479
ENSMUSG00000037568	Vash2	48.7569	40.3789	88.9014	73.6942	0.86998	0.137704
ENSMUSG00000014592	Camta1	123.359	129.889	248.968	204.439	1.0169	0.139989
ENSMUSG00000031728	Zfp821	94.5453	157.564	154.007	220.014	0.709712	0.140849
ENSMUSG00000027434	Nkx2-2	6.87606	4.68341	18.2512	14.4158	1.40328	0.143473
ENSMUSG00000026303	Mlph	30.4452	3.74367	53.2305	4.28877	0.812225	0.14427
ENSMUSG00000066877	Nck2	253.452	206.467	381.607	208.161	0.593531	0.144577
ENSMUSG00000031503	Col4a2	359.268	332.485	1408.96	1027.81	1.97681	0.14484
ENSMUSG00000034730	Adgrb1	42.9921	30.2815	182.656	141.963	2.09221	0.146557
ENSMUSG00000031906	Smpd3	8.0713	7.6954	45.4699	32.5818	2.49998	0.147278
ENSMUSG00000003273	Car11	10.7033	6.69922	25.1382	16.8018	1.23191	0.147767
ENSMUSG00000027859	Ngf	8.36484	30.6442	33.3784	107.972	2.00349	0.147856
ENSMUSG00000041923	Nol4	11.347	13.6812	91.9296	88.6643	3.02113	0.152974
ENSMUSG00000022584	Ly6c2	5.66346	27.6513	20.1469	111.647	1.83812	0.154246
ENSMUSG00000054976	Nyap2	8.01466	6.90947	26.9948	18.5692	1.75476	0.156648
ENSMUSG00000092564	BC051226	65.7766	106.319	118.667	87.2211	0.858613	0.159155
ENSMUSG00000036699	Zcchc12	2.41056	6.17235	15.7207	19.8034	2.71547	0.159155
ENSMUSG00000018381	Abi3	206.799	59.5752	306.963	84.0979	0.573294	0.160456
ENSMUSG00000039232	Stx11	89.0804	634.837	139.953	673.139	0.65835	0.161954
ENSMUSG00000027500	Stmn2	77.3422	58.4692	246.003	159.803	1.67415	0.162783
ENSMUSG00000022865	Cxadr	33.0155	77.0386	128.183	217.829	1.96228	0.162891
ENSMUSG00000036585	Fgf1	9.21722	4.11591	29.0089	13.9229	1.6519	0.163882
ENSMUSG00000032131	Abcg4	14.3739	10.6051	32.1593	15.2581	1.16971	0.165371
ENSMUSG00000030849	Fgfr2	59.7877	36.7066	164.692	115.282	1.46728	0.167431
ENSMUSG00000046169	Adamts6	49.5882	159.894	94.1849	259.788	0.932585	0.172282
ENSMUSG00000031673	Cdh11	175.74	326.398	605.453	830.515	1.78951	0.174556
ENSMUSG00000022935	Grik1	3.26294	2.59176	13.4796	11.9235	2.05177	0.175749
ENSMUSG00000028347	Tmeff1	124.146	751.142	184.618	556.907	0.579429	0.176892
ENSMUSG00000048347	Pcdhb18	3.29033	6.80585	20.1693	21.3438	2.62857	0.177392
ENSMUSG00000031517	Gpm6a	31.9313	21.88	190.19	189.433	2.57676	0.177593
ENSMUSG00000028268	Gbp3	307.376	3469.93	1268.72	4743.68	2.05114	0.178531
ENSMUSG00000008575	Nfib	278.987	407.874	810.122	1002.67	1.54334	0.178555
ENSMUSG00000029755	Dlx5	2.10512	5.3308	44.4441	49.0431	4.41328	0.181639
ENSMUSG00000030310	Slc6a1	38.8522	20.6395	185.473	167.166	2.25973	0.181887
ENSMUSG00000020623	Map2k6	60.0847	65.2592	114.285	172.039	0.93547	0.182035
ENSMUSG00000019889	Ptprk	54.0227	97.8382	111.233	174.329	1.05007	0.182337
ENSMUSG00000042589	Cux2	13.2006	11.8113	68.9837	64.1311	2.39443	0.183444
ENSMUSG00000017314	Mpp2	24.8411	19.5964	48.4436	40.6891	0.965007	0.18534
ENSMUSG00000096606	Tpbgl	136.322	25.9161	198.127	11.4363	0.544958	0.186046
ENSMUSG00000027296	Itpka	9.22998	4.87647	23.6464	1.90081	1.36222	0.190071
ENSMUSG00000030731	Syt3	2.09695	0.2997	16.9735	7.70044	3.02502	0.190568
ENSMUSG00000036062	Phf24	2.70138	2.73794	12.928	7.81226	2.26991	0.195587
ENSMUSG00000039997	Ifi203	2764.9	2891.74	8177.5	3929.21	1.57003	0.198185
ENSMUSG00000021242	Npc2	14738.8	17903.8	21511.7	19231.2	0.551264	0.198901
ENSMUSG00000048376	F2r	117.472	115.304	189.606	183.172	0.699296	0.200321
ENSMUSG00000042734	Ttc9	33.7876	47.2723	64.5803	82.6322	0.93808	0.200857
ENSMUSG00000056144	Trim34a	374.159	915.347	756.236	938.341	1.02002	0.201838
ENSMUSG00000021760	Gpx8	45.5561	33.7489	72.9877	69.2862	0.690142	0.202275
ENSMUSG00000111410	AL670603.1	1.19252	12.4565	15.9578	15.959	3.74201	0.202768
ENSMUSG00000032850	Rnft2	35.3102	14.2645	70.99	31.311	1.01551	0.204828
ENSMUSG00000004105	Angptl2	125.124	159.712	226.967	213.297	0.869483	0.205087
ENSMUSG00000036242	3632451O06Rik	3.58846	1.29588	16.7594	6.35636	2.22405	0.2055
ENSMUSG00000042750	Bex2	11.3945	8.5626	85.23	71.9889	2.91421	0.207265
ENSMUSG00000022044	Stmn4	20.5569	19.1986	140.602	147.279	2.77668	0.21136
ENSMUSG00000050075	Gpr171	18.5668	21	45.07	20.2999	1.29058	0.21298
ENSMUSG00000062488	Ifit3b	53.5105	863.429	657.702	1687.26	3.6243	0.21298
ENSMUSG00000025529	Zfp711	1.18062	7.0971	30.0246	27.004	4.65837	0.213225
ENSMUSG00000034755	Pcdh11x	2.66395	6.38453	16.9272	14.7784	2.66194	0.213648
ENSMUSG00000025491	Ifitm1	24.4654	20.0017	77.609	33.5271	1.66626	0.213705
ENSMUSG00000031951	Tmem231	15.5765	37.8801	40.8215	43.172	1.40089	0.215418
ENSMUSG00000035551	Igfbpl1	16.6521	16.243	112.307	127.929	2.75552	0.215985
ENSMUSG00000068245	Phf11d	809.159	3344.96	2584.3	4214.28	1.68119	0.218264
ENSMUSG00000039485	Tspyl4	55.5983	43.7887	182.129	180.142	1.71551	0.21915
ENSMUSG00000044667	Plppr4	5.74836	70.3884	39.3766	70.401	2.79385	0.219896
ENSMUSG00000004562	Arhgef40	261.556	164.709	428.543	245.176	0.716063	0.224781
ENSMUSG00000027168	Pax6	23.9367	20.0892	50.9076	34.5945	1.09868	0.22753
ENSMUSG00000000223	Drp2	19.5059	6.57023	43.0871	28.4378	1.14741	0.230437
ENSMUSG00000020681	Ace	114.273	9.81895	260.877	16.324	1.19762	0.230543
ENSMUSG00000011589	Fsd1	13.1586	8.36953	31.4339	23.0483	1.26504	0.23148
ENSMUSG00000041571	Selenow	487.97	2096.66	916.315	2295.74	0.914671	0.231554
ENSMUSG00000032796	Lama1	2.69593	6.01229	12.0071	20.6932	2.15212	0.233642
ENSMUSG00000037855	Zfp365	37.3039	30.5757	90.1108	81.1969	1.28053	0.234402
ENSMUSG00000069171	Nr2f1	66.4558	48.2461	135.087	90.8598	1.03245	0.234402
ENSMUSG00000022594	Lynx1	24.244	10.378	46.2469	14.9137	0.942055	0.236044
ENSMUSG00000025656	Arhgef9	49.0222	31.2638	134.581	98.4127	1.46536	0.239592
ENSMUSG00000044676	Zfp612	5.97163	7.62396	18.0292	26.2584	1.59684	0.239721
ENSMUSG00000025790	Slco3a1	43.2619	4410.23	69.6169	4518.99	0.693475	0.242054
ENSMUSG00000024620	Pdgfrb	81.1841	87.2521	349.724	209.498	2.11362	0.243037
ENSMUSG00000025427	Rnf165	11.9332	12.7426	98.0592	103.926	3.04529	0.243456
ENSMUSG00000036986	Pml	1361.34	2202.25	2447.37	2679.17	0.851364	0.24467
ENSMUSG00000026832	Cytip	488.454	129.136	894.218	96.2023	0.878573	0.244742
ENSMUSG00000052485	Tmem171	37.0771	41.4446	112.77	140.11	1.60794	0.246136
ENSMUSG00000055421	Pcdh9	19.3708	18.0423	52.9217	90.5272	1.45379	0.247143
ENSMUSG00000028654	Mycl	2.9575	2.90755	23.8032	17.9556	3.00419	0.253201
ENSMUSG00000096727	Psmb9	309.834	926.178	636.828	1152.77	1.04435	0.254641
ENSMUSG00000022211	Carmil3	4.51568	8.5945	49.1854	35.9902	3.45751	0.258506
ENSMUSG00000074896	Ifit3	408.901	6217.94	4375	8294.45	3.42502	0.258766
ENSMUSG00000003992	Ssbp2	62.766	59.0015	92.5166	118.294	0.569167	0.261828
ENSMUSG00000073144	4930599N23Rik	11.6497	30.291	32.3271	36.4586	1.47983	0.262406
ENSMUSG00000040009	Gnaz	8.05209	2.04145	22.0675	16.7783	1.46042	0.262761
ENSMUSG00000092021	Gbp11	39.1512	117.228	353.657	211.797	3.18119	0.263314
ENSMUSG00000038042	Ptpdc1	51.5646	47.9515	81.2198	62.4026	0.663762	0.263521
ENSMUSG00000051331	Cacna1c	72.4626	65.3764	313.671	227.302	2.11959	0.26456
ENSMUSG00000018604	Tbx3	22.2439	32.324	53.1994	86.2694	1.26826	0.267525
ENSMUSG00000017830	Dhx58	720.712	2466.16	1793.93	2719.06	1.32147	0.267999
ENSMUSG00000031066	Usp11	128.585	147.428	210.169	243.563	0.714314	0.267999
ENSMUSG00000004885	Crabp2	8.92913	12.2007	30.8357	19.2157	1.79282	0.268413
ENSMUSG00000031897	Psmb10	852.59	1354.94	1272.55	1368.32	0.58395	0.272089
ENSMUSG00000027669	Gnb4	118.792	118.177	168.121	159.545	0.505825	0.27601
ENSMUSG00000032118	Fez1	74.7952	51.1149	213.225	164.619	1.51873	0.279728
ENSMUSG00000055980	Irs1	64.735	80.4291	110.903	181.126	0.781959	0.281672
ENSMUSG00000037606	Osbpl5	55.0267	33.5932	86.8577	60.6592	0.663856	0.283163
ENSMUSG00000021477	Ctsl	30659.8	22889.1	44926.9	26681.5	0.557102	0.285745
ENSMUSG00000094365	Gm21982	32.3876	7.78189	72.4816	11.0826	1.16458	0.287444
ENSMUSG00000042686	Jph1	2.37586	10.507	10.0157	19.3693	2.07784	0.289655
ENSMUSG00000030653	Gm45837	222.497	22.0617	329.681	59.6121	0.573522	0.290402
ENSMUSG00000036745	Ttll7	12.3382	9.77749	30.1292	30.837	1.29398	0.292608
ENSMUSG00000038267	Slc22a23	126.78	125.083	200.908	160.456	0.672902	0.294249
ENSMUSG00000027605	Acss2	63.1573	52.2788	128.173	58.7289	1.02801	0.295824
ENSMUSG00000052372	Il1rapl1	1.80427	1.92093	12.2268	8.1768	2.77107	0.29635
ENSMUSG00000074657	Kif5a	104.821	50.0369	240.672	219.835	1.2063	0.296971
ENSMUSG00000033854	Kcnk10	11.6633	21.3862	37.7378	37.5847	1.69705	0.298216
ENSMUSG00000028497	Hacd4	1380.76	647.659	2338.78	1010.46	0.766553	0.298583
ENSMUSG00000004098	Col5a3	80.038	266.325	250.882	620.111	1.65457	0.301521
ENSMUSG00000027951	Adar	2512.03	4142.5	3796.79	4320.48	0.601337	0.304461
ENSMUSG00000028776	Tinagl1	8.6657	12.4513	51.0515	34.5268	2.56744	0.306139
ENSMUSG00000054951	9130008F23Rik	15.1989	15.2864	34.4394	22.1913	1.18682	0.308108
ENSMUSG00000020467	Efemp1	12.2048	3.80775	46.2488	8.55737	1.92538	0.313427
ENSMUSG00000070047	Fat1	827.054	762.969	1472.67	1241.73	0.838879	0.313593
ENSMUSG00000028445	Enho	3.3104	2.82003	19.521	6.93326	2.5661	0.314631
ENSMUSG00000038305	Spats2l	21.528	13.3911	43.4224	28.9907	1.01856	0.315542
ENSMUSG00000039578	Ccser1	2.05766	5.53995	26.3667	24.46	3.67112	0.319359
ENSMUSG00000022619	Mapk8ip2	6.53778	4.75594	61.4982	69.0541	3.23341	0.319748
ENSMUSG00000020811	Wscd1	24.553	16.0968	58.9813	35.2734	1.26792	0.320162
ENSMUSG00000068748	Ptprz1	169.582	112.995	413.115	355.425	1.2896	0.323574
ENSMUSG00000020044	Timp3	316.647	584.884	648.289	1525.96	1.03774	0.327304
ENSMUSG00000021187	Tc2n	9.21994	0.2997	31.6615	2.01073	1.7804	0.3288
ENSMUSG00000031189	Aff2	16.3941	11.228	34.7581	42.24	1.09395	0.331568
ENSMUSG00000073409	H2-Q6	138.582	3407.21	351.703	6923.09	1.34739	0.332991
ENSMUSG00000006586	Runx1t1	9.54732	9.77749	95.2293	72.7998	3.3227	0.333295
ENSMUSG00000038143	Stox2	134.085	107.195	425.506	363.035	1.67109	0.33523
ENSMUSG00000020173	Cobl	4.9978	5.54841	18.7543	14.6116	1.90526	0.335917
ENSMUSG00000071658	Gng3	14.6501	17.8547	41.1184	45.0123	1.49394	0.336966
ENSMUSG00000039419	Cntnap2	1.48606	1.02073	12.1859	7.76811	3.03542	0.339103
ENSMUSG00000029122	Evc	32.5614	19.4748	58.1844	39.2878	0.846298	0.34327
ENSMUSG00000047787	Flrt1	9.94311	5.67959	26.8909	19.4717	1.44044	0.343627
ENSMUSG00000030607	Acan	5.3781	0.648491	25.1382	4.92253	2.22826	0.347548
ENSMUSG00000001986	Gria3	53.9368	40.7735	114.084	93.468	1.08507	0.351958
ENSMUSG00000030157	Clec2d	241.754	376.96	402.553	458.843	0.742821	0.352535
ENSMUSG00000031558	Slit2	91.7279	225.2	213.414	546.292	1.22594	0.354273
ENSMUSG00000025085	Ablim1	35.8187	10.9528	63.2405	23.3156	0.826615	0.357918
ENSMUSG00000053693	Mast1	17.152	8.74913	91.469	57.0531	2.42547	0.357955
ENSMUSG00000072964	Bhlhb9	47.2472	44.5556	111.206	91.6462	1.24583	0.360766
ENSMUSG00000055320	Tead1	336.262	365.711	633.676	652.613	0.921511	0.362489
ENSMUSG00000035864	Syt1	3.59577	1.71721	36.6673	19.6131	3.36154	0.362489
ENSMUSG00000047786	Lix1	17.9222	47.2627	49.9048	61.7338	1.4829	0.365385
ENSMUSG00000028488	Sh3gl2	3.28301	2.24407	23.3108	25.7129	2.83124	0.365638
ENSMUSG00000024397	Aif1	67.1429	80.872	199.13	160.482	1.57286	0.365751
ENSMUSG00000041939	Mvk	155.043	109.028	247.144	123.944	0.67847	0.365766
ENSMUSG00000006930	Hap1	15.8445	65.4981	76.4561	135.849	2.27916	0.36655
ENSMUSG00000073491	Ifi213	271.176	726.001	1472.75	1094.86	2.44749	0.367463
ENSMUSG00000051177	Plcb1	186.103	49.6743	357.94	112.236	0.949549	0.371716
ENSMUSG00000037979	Ccdc92	12.5596	10.6286	27.3028	22.9511	1.12303	0.372232
ENSMUSG00000020886	Dlg4	208.255	258.945	305.795	329.437	0.557399	0.375779
ENSMUSG00000037126	Psd	50.7826	288.929	103.116	231.69	1.02823	0.377455
ENSMUSG00000027004	Frzb	2.41515	34.7922	15.3533	43.8024	2.68802	0.379608
ENSMUSG00000019989	Enpp3	2.35851	1.02073	12.1969	3.53429	2.37218	0.379975
ENSMUSG00000021301	Hecw1	2.07773	2.68994	15.1748	18.9409	2.86363	0.382082
ENSMUSG00000022577	Ly6h	0.879763	1.02073	22.7831	22.2811	4.67613	0.384364
ENSMUSG00000006651	Aplp1	63.3058	93.2142	196.445	204.849	1.64018	0.386339
ENSMUSG00000057722	Lepr	13.6681	24.9602	50.9492	36.8123	1.89928	0.386379
ENSMUSG00000089715	Cbx6	191.646	186.076	299.088	264.114	0.648069	0.388315
ENSMUSG00000029636	Wasf3	25.4274	17.1593	53.9264	45.6845	1.09052	0.391228
ENSMUSG00000052364	B630019K06Rik	2.66668	2.34115	11.2108	10.702	2.0723	0.392203
ENSMUSG00000045180	Shroom2	27.2874	25.6483	51.8493	47.6422	0.932472	0.393695
ENSMUSG00000087006	Gm13889	8.35208	53.7689	40.011	58.3699	2.2606	0.395123
ENSMUSG00000073293	Nudt10	2.10698	2.88411	16.1275	15.5052	2.93915	0.396042
ENSMUSG00000000031	H19	237.3	34.3685	1148.27	77.6156	2.28147	0.402517
ENSMUSG00000018593	Sparc	952.363	859.926	2071.27	1354.46	1.12805	0.409794
ENSMUSG00000032725	Folr2	710.461	313.487	1710.88	641.077	1.27275	0.414645
ENSMUSG00000037995	Igsf9	78.9496	78.3538	143.201	171.993	0.868354	0.420171
ENSMUSG00000044258	Ctla2a	33.626	31.0036	90.9649	95.0992	1.44021	0.422924
ENSMUSG00000029563	Foxp2	9.48065	7.12054	122.004	89.1421	3.68242	0.424486
ENSMUSG00000020950	Foxg1	43.4244	47.0183	205.975	182.409	2.25267	0.424548
ENSMUSG00000026447	Pik3c2b	30.2073	27.7036	58.7505	47.4533	0.959425	0.427704
ENSMUSG00000027805	Pfn2	122.366	144.398	235.967	238.363	0.956354	0.431429
ENSMUSG00000055653	Gpc3	4.41889	3.50805	15.8885	19.6131	1.84332	0.432378
ENSMUSG00000028137	Celf3	56.8117	44.4266	220.778	150.423	1.96352	0.432447
ENSMUSG00000029121	Crmp1	37.015	37.0001	373.25	345.28	3.33826	0.433947
ENSMUSG00000040296	Ddx58	2502.03	7160.56	5917.21	7941.68	1.24746	0.43413
ENSMUSG00000027514	Zbp1	782.801	4230.11	3370.9	4368.43	2.11206	0.435421
ENSMUSG00000037736	Limch1	125.747	65.368	187.756	137.794	0.579895	0.437014
ENSMUSG00000092074	Dynlt1a	153.155	114.173	229.427	146.506	0.589052	0.437031
ENSMUSG00000005672	Kit	14.4305	47.2777	30.455	91.1125	1.08366	0.438464
ENSMUSG00000030351	Tspan11	3.57842	0.696482	15.8252	5.18985	2.14366	0.439825
ENSMUSG00000040852	Plekhh2	98.0945	73.9665	171.369	164.962	0.811144	0.445382
ENSMUSG00000039501	Znfx1	5091.81	9359.05	10716	10260.1	1.07913	0.445915
ENSMUSG00000019467	Arhgef25	42.2259	37.8563	110.664	70.8172	1.39522	0.450806
ENSMUSG00000035459	Stab2	45.0725	1.51459	92.6153	2.67737	1.04154	0.451406
ENSMUSG00000040229	Gpr34	25.336	4.30162	54.3851	7.1677	1.10534	0.455716
ENSMUSG00000042751	Nmnat2	35.5764	51.7915	163.206	175.594	2.20608	0.457184
ENSMUSG00000070034	Sp110	1315.72	2111.34	2409.82	2287.21	0.878452	0.457345
ENSMUSG00000050556	Kcnb1	23.1044	21.2337	54.3146	43.8001	1.23979	0.461667
ENSMUSG00000052551	Adarb2	10.4618	3.01419	97.8913	49.7938	3.23402	0.461908
ENSMUSG00000052727	Map1b	634.309	989.464	2581.31	3327.89	2.03116	0.462614
ENSMUSG00000058571	Gpc6	63.9448	46.0372	145.92	82.5358	1.19401	0.463692
ENSMUSG00000069892	9930111J21Rik2	2842.11	1985.06	4605.94	2481.02	0.701669	0.463978
ENSMUSG00000038037	Socs1	47.763	610.217	109.651	683.256	1.20237	0.468726
ENSMUSG00000006418	Rnf114	1699.14	3332.75	2440.15	3393.97	0.528463	0.472943
ENSMUSG00000045573	Penk	30.6474	652.209	61.4044	323.913	1.01004	0.473999
ENSMUSG00000024799	Tm7sf2	54.617	29.3333	86.7214	28.0788	0.675727	0.474016
ENSMUSG00000085828	Gm15612	2.66123	1.24789	12.2567	4.03415	2.19528	0.474983
ENSMUSG00000034910	Pygo1	18.2038	14.7914	84.3571	66.7737	2.21736	0.476916
ENSMUSG00000034799	Unc13a	202.186	90.2377	361.674	165.308	0.846489	0.478007
ENSMUSG00000046668	Cxxc5	109.483	80.4079	228.158	150.485	1.06757	0.479382
ENSMUSG00000047907	Tshz2	8.46436	5.5165	25.954	31.2763	1.63717	0.479679
ENSMUSG00000024672	Ms4a7	275.42	1905.94	1048.11	2324.87	1.93368	0.480313
ENSMUSG00000035352	Ccl12	805.391	594.402	1957.43	1789.12	1.2877	0.487591
ENSMUSG00000031486	Adgra2	160.014	250.092	564.06	871.159	1.82401	0.487857
ENSMUSG00000039257	Vstm2b	5.04254	12.2092	21.5753	28.9048	2.09391	0.494797
ENSMUSG00000015312	Gadd45b	117.857	1253.85	181.09	1279.12	0.623809	0.494875
ENSMUSG00000021838	Samd4	127.423	158.845	204.111	244.078	0.687325	0.500085
ENSMUSG00000031302	Nlgn3	20.4277	8.73112	57.7153	40.272	1.50576	0.503565
ENSMUSG00000055737	Ghr	32.3235	36.1092	53.5835	95.2805	0.735147	0.504557
ENSMUSG00000063268	Parp10	535.933	1789.95	1026.7	2019.51	0.944335	0.509118
ENSMUSG00000026915	Strbp	165.289	233.39	254.101	304.938	0.62677	0.51587
ENSMUSG00000028019	Pdgfc	594.58	142.474	969.832	198.491	0.711186	0.516806
ENSMUSG00000070436	Serpinh1	517.699	584.542	1731.72	1266.45	1.7486	0.521825
ENSMUSG00000032776	Mctp2	14.2963	12.2956	47.6719	20.9426	1.73586	0.522306
ENSMUSG00000062380	Tubb3	79.451	45.6412	473.773	244.992	2.58191	0.524003
ENSMUSG00000042821	Snai1	20.9318	10.8386	91.939	31.5238	2.14478	0.530109
ENSMUSG00000035640	Cbarp	66.4394	80.0637	111.861	94.7238	0.75829	0.532856
ENSMUSG00000006411	Nectin4	66.4554	33.7873	142.918	31.7691	1.10895	0.533629
ENSMUSG00000022840	Adcy5	32.1728	39.9245	68.2712	66.7994	1.08945	0.538884
ENSMUSG00000014329	Bicc1	66.3978	44.0075	250.302	71.1395	1.92061	0.544288
ENSMUSG00000025887	Casp12	26.0163	13.967	60.1793	25.7002	1.22118	0.545658
ENSMUSG00000020473	Aebp1	334.781	464.978	1266.01	956.061	1.92446	0.551504
ENSMUSG00000055994	Nod2	146.431	368.598	228.685	417.143	0.648519	0.5606
ENSMUSG00000010358	Ifi35	479.234	1278.02	915.579	1404.51	0.939769	0.561062
ENSMUSG00000028541	B4galt2	25.9862	24.8397	65.6517	41.1063	1.34554	0.562013
ENSMUSG00000094626	Cecr6	0.897114	1.57214	11.0373	7.59052	3.62587	0.563519
ENSMUSG00000022012	Enox1	10.7781	12.6859	61.4585	50.7498	2.51917	0.563741
ENSMUSG00000028402	Mpdz	59.9221	54.8528	134.586	123.646	1.17024	0.564902
ENSMUSG00000033910	Gucy1a3	6.58065	3.78211	104.259	64.2467	3.99173	0.571005
ENSMUSG00000086496	Gm14204	3.25563	4.80393	43.2826	39.4527	3.72933	0.571033
ENSMUSG00000056486	Chn1	21.7996	20.7952	83.6923	67.328	1.9476	0.573762
ENSMUSG00000026188	Tmem169	2.4206	1.36952	11.6472	12.1908	2.27289	0.573971
ENSMUSG00000048388	Fam171b	73.0484	94.2074	236.313	213.806	1.70131	0.582748
ENSMUSG00000024066	Xdh	1357.44	1303.04	2234.32	1807.42	0.725247	0.585757
ENSMUSG00000038811	Gngt2	215.464	86.0607	312.285	87.6063	0.541106	0.588689
ENSMUSG00000003617	Cp	731.635	5719.45	1156.41	6306.6	0.668013	0.5891
ENSMUSG00000028226	Mmp16	17.8902	11.7644	64.2072	45.0916	1.84866	0.592464
ENSMUSG00000039899	Fgl2	237.126	109.494	501.37	164.113	1.08534	0.593887
ENSMUSG00000038188	Scarf1	61.1576	59.4378	95.7809	64.8456	0.653349	0.597134
ENSMUSG00000016496	Cd274	3129.06	15570.4	5517.47	16966.3	0.82381	0.600475
ENSMUSG00000022113	Trim52	6.2451	8.09218	19.2483	7.05588	1.62539	0.601118
ENSMUSG00000049670	Morn4	35.8544	63.0268	65.2755	70.7678	0.870242	0.601984
ENSMUSG00000031840	Rab3a	59.7619	58.8722	115.786	83.1762	0.957578	0.603106
ENSMUSG00000022676	Snai2	13.1358	15.474	43.2376	55.8612	1.72383	0.606864
ENSMUSG00000001120	Pcbp3	32.34	39.5725	92.3106	93.1058	1.52252	0.607979
ENSMUSG00000043498	9330132A10Rik	5.96891	6.67577	18.0645	17.0766	1.59998	0.608992
ENSMUSG00000046191	Pcdhb20	5.3781	3.78321	23.2991	18.9318	2.12401	0.610294
ENSMUSG00000025813	Homer2	5.94883	5.67849	29.0883	23.6566	2.29789	0.614654
ENSMUSG00000029861	Fam131b	6.62267	11.2686	40.6146	45.2363	2.6273	0.615792
ENSMUSG00000025478	Dpysl4	11.3297	11.0606	28.1097	31.5821	1.31472	0.618033
ENSMUSG00000039004	Bmp6	6.55785	14	20.6295	30.238	1.65918	0.625536
ENSMUSG00000040118	Cacna2d1	46.2331	36.3578	108.276	77.1534	1.23281	0.626146
ENSMUSG00000072214	Sept5	102.288	51.6622	288.731	192.547	1.5039	0.626792
ENSMUSG00000031174	Rpgr	70.2803	98.0651	104.299	144.901	0.577922	0.629791
ENSMUSG00000060240	Cend1	25.358	5.42678	47.1083	17.0015	0.896619	0.630401
ENSMUSG00000026443	Lrrn2	25.9998	10.588	62.4494	19.7043	1.269	0.630671
ENSMUSG00000026959	Grin1	3.86924	1.74175	16.7002	12.0353	2.10756	0.632147
ENSMUSG00000055172	C1ra	410.225	526.67	659.621	595.074	0.691006	0.634578
ENSMUSG00000058743	Kcnj14	0.616335	3.01419	17.2534	9.55376	4.84475	0.637048
ENSMUSG00000066705	Fxyd6	22.5301	15.1904	98.815	78.4937	2.13797	0.638998
ENSMUSG00000026088	Mitd1	298.99	529.004	555.928	598.519	0.900087	0.6438
ENSMUSG00000030107	Usp18	479.576	3713.89	1784.08	5064.79	1.90117	0.647708
ENSMUSG00000026890	Lhx6	11.5638	3.98583	45.1393	16.4044	1.96875	0.648491
ENSMUSG00000042388	Dlgap3	2.37586	6.09982	28.1787	24.4182	3.56891	0.648648
ENSMUSG00000036564	Ndrg4	83.7297	75.9797	191.057	130.388	1.19581	0.659229
ENSMUSG00000056004	9330182L06Rik	8.6548	6.18191	22.3581	15.0349	1.37565	0.66035
ENSMUSG00000024238	Zeb1	169.633	521.266	336.287	630.978	0.994546	0.660428
ENSMUSG00000037035	Inhbb	42.641	30.2016	137.087	68.7074	1.68948	0.665362
ENSMUSG00000026809	Spaca9	61.6557	62.6159	92.7681	76.8325	0.597882	0.668815
ENSMUSG00000028909	Ptpru	7.19699	21.4993	26.2156	67.3333	1.87834	0.674009
ENSMUSG00000044433	Camsap3	5.10463	4.61823	32.6539	25.4564	2.68159	0.675664
ENSMUSG00000032452	Clstn2	10.6494	7.15355	41.3991	32.8492	1.9585	0.677724
ENSMUSG00000104713	Gbp6	985.219	6736.8	3560.35	6706.41	1.85922	0.678369
ENSMUSG00000021217	Tshz3	97.0138	85.4133	139.306	159.152	0.530385	0.678757
ENSMUSG00000045174	Amer3	0.889801	1.96892	23.3801	19.102	4.70968	0.689761
ENSMUSG00000030226	Lmo3	1.19524	0.623946	17.1527	15.5897	3.85084	0.693192
ENSMUSG00000078794	Dact3	35.6805	20.5596	69.1755	34.774	0.96327	0.69406
ENSMUSG00000048915	Efna5	19.6224	18.6962	41.0783	29.2787	1.07215	0.696462
ENSMUSG00000055629	B4galnt4	13.1924	6.05073	51.9132	42.3828	1.98116	0.696794
ENSMUSG00000040483	Xaf1	494.796	2135.58	1563.09	2416.17	1.66532	0.698848
ENSMUSG00000074480	Mex3a	109.823	150.938	264.232	305.626	1.273	0.699092
ENSMUSG00000044528	Tram1l1	5.69085	7.3158	18.8752	20.9718	1.74591	0.699365
ENSMUSG00000038058	Nod1	445.83	590.488	717.768	902.544	0.694848	0.70133
ENSMUSG00000053137	Mapk11	14.5652	19.8236	32.4915	43.5901	1.15535	0.70133
ENSMUSG00000072596	Ear2	1202.46	43.7811	2362.83	81.8955	0.980823	0.701688
ENSMUSG00000040412	5330417C22Rik	0	1.32043	10.9851	3.96649	6.06301	0.703784
ENSMUSG00000035934	Pknox2	40.2012	10.3619	103.309	66.257	1.36418	0.707106
ENSMUSG00000048616	Nog	25.8122	21.5792	61.7718	43.879	1.26693	0.707718
ENSMUSG00000027002	Nckap1	223.174	304.714	427.362	533.45	0.944624	0.70817
ENSMUSG00000040125	Gpr26	8.0713	7.096	113.691	72.3427	3.82109	0.708525
ENSMUSG00000022791	Tnk2	127.287	242.394	226.375	396.148	0.831868	0.711877
ENSMUSG00000104058	Etv3l	0	2.59396	16.5844	3.22281	6.65421	0.712621
ENSMUSG00000057137	Tmem140	423.473	952.253	814.967	1104.73	0.95198	0.713935
ENSMUSG00000034205	Loxl2	126.937	212.356	467.232	493.704	1.88667	0.715324
ENSMUSG00000062444	Ap3b2	17.2821	10.685	75.2574	59.7982	2.12607	0.717545
ENSMUSG00000019856	Fam184a	11.0114	3.5645	25.0056	13.9891	1.18262	0.722531
ENSMUSG00000022894	Adamts5	37.4547	67.6279	60.2114	80.2615	0.690138	0.726928
ENSMUSG00000006403	Adamts4	48.2219	272.324	109.616	396.45	1.19609	0.728011
ENSMUSG00000025777	Gdap1	7.17233	3.5656	45.2737	40.3152	2.66447	0.728836
ENSMUSG00000045193	Cirbp	163.545	176.094	234.867	203.032	0.528645	0.732289
ENSMUSG00000022587	Ly6e	11365.9	11441.5	25813.2	15629.4	1.18909	0.734159
ENSMUSG00000032419	Tbx18	15.5691	12.9537	101.49	77.5066	2.71363	0.734555
ENSMUSG00000078853	Igtp	333.101	1392.27	1025.5	2042.22	1.62687	0.735528
ENSMUSG00000035835	Plppr3	121.531	72.767	252.882	182.217	1.06398	0.740738
ENSMUSG00000105852	Gm42890	15.8627	17.1326	35.8194	16.9038	1.1735	0.741181
ENSMUSG00000034947	Tmem106a	2636.32	3267.72	4068.12	3979.25	0.631449	0.74247
ENSMUSG00000029053	Prkcz	45.0671	42.1782	71.6294	55.8885	0.674055	0.742978
ENSMUSG00000079560	Hoxa3	3.56838	2.81157	14.6301	18.4828	2.03255	0.746242
ENSMUSG00000034220	Gpc1	335.858	856.226	487.708	576.83	0.543034	0.753764
ENSMUSG00000020844	Nxn	110.913	98.7076	184.855	106.475	0.742104	0.754151
ENSMUSG00000062170	Fmr1nb	11.9278	10.7426	36.1733	26.6342	1.60943	0.757456
ENSMUSG00000049336	Tenm2	1.50614	6.90184	51.2102	47.5054	5.1029	0.7583
ENSMUSG00000025551	Fgf14	2.07501	2.26862	12.1504	12.048	2.55554	0.760571
ENSMUSG00000021591	Glrx	1605.96	4319.86	2472.2	8544.58	0.627643	0.761204
ENSMUSG00000053414	Hunk	32.8403	32.2749	85.7258	96.6786	1.38983	0.761204
ENSMUSG00000069227	Gprin1	9.84359	9.23344	69.7394	50.6639	2.82598	0.762312
ENSMUSG00000001123	Lgals9	3316.24	3547.92	5645.59	3990.43	0.773544	0.763257
ENSMUSG00000073295	Nudt11	5.01788	1.4985	20.7621	16.2141	2.04991	0.763273
ENSMUSG00000024421	Lama3	34.9646	1.74175	79.393	1.81107	1.18947	0.766639
ENSMUSG00000025058	5430427O19Rik	159.126	287.173	275.144	365.573	0.795995	0.767052
ENSMUSG00000097567	Gm26637	39.4137	55.2461	64.9599	59.4284	0.723063	0.76876
ENSMUSG00000022887	Masp1	40.9472	26.2946	107.659	41.5296	1.40027	0.769156
ENSMUSG00000037032	Apbb1	36.8762	28.6616	101.101	78.856	1.45911	0.771299
ENSMUSG00000026837	Col5a1	445.483	1081.31	1420.18	1344.07	1.67758	0.773563
ENSMUSG00000036815	Dpp10	6.27707	5.0641	22.4459	12.9105	1.84053	0.776163
ENSMUSG00000026840	Lamc3	1.48606	3.11127	14.6115	13.3023	3.29737	0.778113
ENSMUSG00000090523	Gypc	101.366	243.054	151.574	355.542	0.582553	0.779296
ENSMUSG00000052957	Gas1	61.9511	35.8225	201.484	89.2577	1.70973	0.780644
ENSMUSG00000047146	Tet1	17.5948	34.39	73.3186	74.632	2.06312	0.782267
ENSMUSG00000072115	Ang	129.728	73.9979	184.621	85.0352	0.516653	0.785441
ENSMUSG00000037784	Dzip1l	33.6626	30.849	77.1204	81.1091	1.19782	0.786373
ENSMUSG00000032281	Acsbg1	43.8827	224.837	70.5876	318.555	0.686379	0.787147
ENSMUSG00000028597	Gpx7	19.1055	12.573	39.2796	24.0921	1.04469	0.788222
ENSMUSG00000023961	Enpp4	88.8087	469.149	241.067	760.561	1.446	0.789458
ENSMUSG00000001506	Col1a1	1480.02	497.974	6060.13	1393.92	2.03984	0.789999
ENSMUSG00000073599	Ecscr	4.7837	6.61713	23.0551	10.3778	2.2766	0.791209
ENSMUSG00000036887	C1qa	11708.7	5048.89	22353.9	7840.73	0.938726	0.793668
ENSMUSG00000070390	Nlrp1b	230.393	28.2569	332.764	28.2508	0.535947	0.793802
ENSMUSG00000041482	Piezo2	14.3685	27.3014	40.3646	82.5062	1.49767	0.805836
ENSMUSG00000032018	Sc5d	390.087	249.458	689.166	268.265	0.828246	0.81701
ENSMUSG00000028763	Hspg2	766.272	769.178	1539.88	1085.64	1.01358	0.820355
ENSMUSG00000058966	Fam57b	5.69358	3.51651	49.9691	35.8253	3.13825	0.828483
ENSMUSG00000016756	Cmah	32.5175	18.4306	80.1769	19.926	1.31003	0.829636
ENSMUSG00000040987	Mill2	24.8102	20.8647	58.2522	41.4548	1.24006	0.830238
ENSMUSG00000016624	Phf21b	16.7589	17.1102	42.1142	58.1299	1.3264	0.831278
ENSMUSG00000054072	Iigp1	55.9037	435.5	819.091	991.242	3.8799	0.836335
ENSMUSG00000009292	Trpm2	35.0167	52.362	61.6302	110.571	0.825789	0.83779
ENSMUSG00000055675	Kbtbd11	46.4728	23.6804	76.6311	45.9377	0.728696	0.838576
ENSMUSG00000043843	Tmem145	1.77688	0.923646	10.3699	8.57944	2.54302	0.842864
ENSMUSG00000022206	Npr3	14.279	53.4596	43.969	135.57	1.62214	0.846159
ENSMUSG00000033510	Otud7a	1.47875	3.03873	14.8911	12.3904	3.32422	0.84914
ENSMUSG00000103730	Gm38316	130.954	180.206	312.654	241.824	1.25836	0.849737
ENSMUSG00000036782	Klhl13	54.4678	21.3562	96.9524	47.7704	0.842821	0.855368
ENSMUSG00000027546	Atp9a	79.8248	48.3494	182.015	146.302	1.19286	0.856088
ENSMUSG00000048534	Jaml	4.78097	1.54759	16.3643	1.3112	1.77529	0.862889
ENSMUSG00000027777	Schip1	52.0736	84.2764	110.416	126.711	1.09192	0.86622
ENSMUSG00000014837	4931428F04Rik	74.5928	51.6112	110.489	84.6818	0.575831	0.866738
ENSMUSG00000000244	Tspan32	178.54	109.029	274.361	115.691	0.628316	0.872288
ENSMUSG00000079164	Tlr5	2.40784	0.623946	10.9608	0.844222	2.20399	0.872479
ENSMUSG00000056895	Hist3h2ba	3.89117	2.39024	14.3559	12.1889	1.89431	0.873637
ENSMUSG00000034675	Dbn1	155.954	152.271	638.688	465.953	2.04033	0.888663
ENSMUSG00000037552	Plekhg2	221.438	297.857	362.262	337.247	0.714312	0.892447
ENSMUSG00000045103	Dmd	67.3803	26.9602	163.12	44.5931	1.2818	0.894142
ENSMUSG00000072235	Tuba1a	3249.79	2564.78	4785.47	3205.7	0.564212	0.897866
ENSMUSG00000030737	Slco2b1	353.601	1.7663	738.61	1.8881	1.06904	0.898001
ENSMUSG00000029661	Col1a2	1159.78	434.64	4585.74	977.294	1.9894	0.898187
ENSMUSG00000090223	Pcp4	2.39321	1.96892	27.1516	16.6557	3.51011	0.89927
ENSMUSG00000001761	Smo	135.273	176.751	209.655	185.276	0.636959	0.900864
ENSMUSG00000032661	Oas3	1418.85	5042.94	5876.32	6180.4	2.05587	0.902558
ENSMUSG00000026556	Vangl2	92.5447	105.745	162.429	141.572	0.81741	0.907712
ENSMUSG00000033278	Ptprm	91.9074	233.415	182.238	328.297	0.991015	0.908275
ENSMUSG00000074743	Thbd	204.609	210.503	465.204	698.713	1.18894	0.916846
ENSMUSG00000042763	Maneal	4.79101	0.721027	23.3146	17.7231	2.29402	0.917351
ENSMUSG00000021139	Gm20498	88.3888	141.572	143.025	111.537	0.693342	0.922771
ENSMUSG00000026674	Ddr2	113.81	168.766	305.239	436.545	1.42974	0.924015
ENSMUSG00000055567	Unc80	1.19524	2.04145	12.5046	7.12354	3.39799	0.925396
ENSMUSG00000055447	Cd47	3306.97	7469.62	4971.17	7004.52	0.593995	0.927608
ENSMUSG00000047935	Gm5607	13.6443	7.58986	84.4693	73.185	2.63313	0.928472
ENSMUSG00000051242	Pcdhb9	1.4961	2.34115	17.6099	14.6008	3.56543	0.931648
ENSMUSG00000025092	Hspa12a	383.064	23.3017	655.15	23.396	0.780847	0.933116
ENSMUSG00000034459	Ifit1	342.579	6727.99	2084.13	8200.76	2.61145	0.934071
ENSMUSG00000055430	Nap1l5	11.978	17.0941	34.4693	35.2189	1.53115	0.934685
ENSMUSG00000024935	Slc1a1	7.5965	20.9019	48.4764	45.5182	2.6927	0.935417
ENSMUSG00000022106	Rcbtb2	1017.89	327.816	1566.82	326.326	0.629122	0.935755
ENSMUSG00000050730	Arhgap42	33.6561	37.6878	76.4377	56.4489	1.1839	0.935888
ENSMUSG00000045838	A430105I19Rik	29.8134	35.6101	54.751	70.8868	0.877372	0.93735
ENSMUSG00000062760	1810041L15Rik	8.71689	4.75484	39.063	29.9923	2.17743	0.93892
ENSMUSG00000039579	Grin3a	22.7287	12.0952	62.2497	47.3621	1.45434	0.939665
ENSMUSG00000040856	Dlk1	16.4288	21.3052	87.2065	99.4467	2.41201	0.940624
ENSMUSG00000048450	Msx1	8.91636	2.31661	53.9135	5.53421	2.59824	0.941072
ENSMUSG00000027848	Olfml3	53.7401	59.2583	130.029	126.2	1.28094	0.944452
ENSMUSG00000028782	Adgrb2	59.0868	63.545	163.892	167.098	1.478	0.947154
ENSMUSG00000027239	Mdk	50.7498	31.0524	132.505	63.1069	1.3853	0.949522
ENSMUSG00000032690	Oas2	1144.55	2136.81	3066.77	2173.66	1.42784	0.951043
ENSMUSG00000036446	Lum	24.9137	29.8302	94.6338	99.2953	1.92739	0.954168
ENSMUSG00000039911	Spsb1	66.9526	230.11	140.445	359.759	1.07448	0.954349
ENSMUSG00000033618	Map3k13	28.116	23.5193	48.5164	69.6084	0.793336	0.955494
ENSMUSG00000043969	Emx2	5.34798	12.462	16.1086	19.2373	1.59308	0.959368
ENSMUSG00000031502	Col4a1	471.59	355.041	1711.17	978.671	1.8662	0.964278
ENSMUSG00000039304	Tnfsf10	36.2	51.8373	172.298	124.128	2.25408	0.967159
ENSMUSG00000034336	Ina	3.03421	8.1808	102.653	84.9933	5.10421	0.96728
ENSMUSG00000034422	Parp14	4356.03	13482.3	8297.62	12661	0.935398	0.969869
ENSMUSG00000026235	Epha4	36.5266	209.164	112.262	248.516	1.62636	0.971185
ENSMUSG00000030691	Fchsd2	497.029	875.595	710.277	1030.61	0.519617	0.974872
ENSMUSG00000051323	Pcdh19	27.5398	28.8405	83.7155	79.5436	1.61496	0.9879
ENSMUSG00000048600	Gm5763	31.9633	41.9589	68.44	48.5594	1.09907	0.989095
ENSMUSG00000062961	Ccdc177	3.29491	0.623946	15.4877	11.0351	2.24019	0.989321
ENSMUSG00000019866	Crybg1	805.555	703.775	1262.21	785.095	0.654226	0.990784
ENSMUSG00000054934	Kcnmb4	1.4961	1.62013	17.7402	10.1909	3.56929	0.992721
ENSMUSG00000031144	Syp	12.4948	11.4233	63.0832	47.7394	2.33607	0.996322
ENSMUSG00000060371	Caln1	0.606297	0.2997	10.0213	7.92218	4.06833	0.998976
ENSMUSG00000027210	Meis2	109.584	103.066	680.65	566.128	2.63884	0.999099
ENSMUSG00000039270	Megf9	385.617	182.507	570.467	222.842	0.572982	0.999099
ENSMUSG00000000560	Gabra2	0.897114	1.32043	13.213	13.4564	3.89087	0.999429
ENSMUSG00000051951	Xkr4	3.00682	3.85684	19.9325	15.2454	2.74162	1
ENSMUSG00000025938	Slco5a1	21.7676	24.9261	151.487	105.118	2.80258	1
ENSMUSG00000025932	Eya1	16.3795	6.42516	36.7196	15.4906	1.1723	1
ENSMUSG00000092083	Kcnb2	4.76635	2.94055	19.1028	14.1465	2.00718	1
ENSMUSG00000026126	Ptpn18	211.231	45.1092	324.756	30.5255	0.62976	1
ENSMUSG00000100280	Gm28417	6.8861	2.24407	18.2508	4.03415	1.40795	1
ENSMUSG00000048814	Lonrf2	13.1285	10.0131	80.6168	83.2551	2.62675	1
ENSMUSG00000060424	Pantr1	10.7654	8.47507	33.4943	33.3603	1.6435	1
ENSMUSG00000045515	Pou3f3	111.361	124.907	279.552	353.783	1.33393	1
ENSMUSG00000026043	Col3a1	1011.18	323.821	4011.8	962.429	1.99425	1
ENSMUSG00000026109	Tmeff2	19.0773	16.9098	38.4037	32.7575	1.00999	1
ENSMUSG00000026107	Nabp1	2226.48	1369.02	3220.96	930.996	0.538507	1
ENSMUSG00000026104	Stat1	2845.02	9445.63	7009.6	10879.7	1.30665	1
ENSMUSG00000026023	Cdk15	28.1233	2.34115	58.0393	2.60033	1.05362	1
ENSMUSG00000015222	Map2	150.146	127.12	815.702	794.312	2.44768	1
ENSMUSG00000026204	Ptprn	76.9368	187.436	244.902	366.568	1.67721	1
ENSMUSG00000026211	Obsl1	40.1132	30.5973	113.536	52.8212	1.51026	1
ENSMUSG00000050711	Scg2	40.9948	40.2711	137.005	198.994	1.74665	1
ENSMUSG00000052477	C130026I21Rik	56.746	128.872	125.449	171.146	1.15256	1
ENSMUSG00000091199	Gm2619	2.99678	17.621	17.8094	43.896	2.57106	1
ENSMUSG00000079457	Gm7609	23.0488	130.599	119.16	180.511	2.37876	1
ENSMUSG00000090186	Gm7592	9.58934	47.0898	34.379	54.1088	1.83838	1
ENSMUSG00000070031	Sp140	880.453	1620.52	1264.94	1600.31	0.528678	1
ENSMUSG00000026222	Sp100	2333.42	3908.25	5171.96	4637.85	1.15373	1
ENSMUSG00000026228	Htr2b	66.7795	156.876	111.068	218.947	0.736327	1
ENSMUSG00000048126	Col6a3	148.967	41.8978	500.555	90.1531	1.75212	1
ENSMUSG00000026399	Cd55	14.9008	69.7209	50.8991	216.958	1.77072	1
ENSMUSG00000016524	Il19	7.42299	8.39298	19.5185	102.747	1.40854	1
ENSMUSG00000079330	Lemd1	1.18521	0.696482	10.5153	8.67666	3.14322	1
ENSMUSG00000042066	Tmcc2	21.5033	39.5651	62.4409	79.4624	1.5497	1
ENSMUSG00000026357	Rgs18	40.192	3.63814	64.4927	6.4442	0.6844	1
ENSMUSG00000042641	Rgsl1	5.33063	5.18573	16.5375	7.72252	1.63666	1
ENSMUSG00000040836	Gpr161	23.5601	29.7066	87.9505	78.0272	1.90201	1
ENSMUSG00000052534	Pbx1	459.858	405.14	901.575	918.193	0.97654	1
ENSMUSG00000102418	Sh2d1b1	515.44	116.13	783.427	121.417	0.611346	1
ENSMUSG00000059089	Fcgr4	673.255	697.117	1717.45	1411	1.35757	1
ENSMUSG00000038179	Slamf7	443.008	6038.15	788.911	6372.53	0.838567	1
ENSMUSG00000026548	Slamf9	191.032	292.566	273.372	574.13	0.520973	1
ENSMUSG00000037849	Ifi206	497.762	3631.93	3174.87	5016	2.67869	1
ENSMUSG00000070501	Ifi214	12.8249	89.5913	93.3679	166.251	2.86527	1
ENSMUSG00000066677	Ifi208	179.771	727.314	1549.74	1531.19	3.11223	1
ENSMUSG00000073490	Ifi207	4601.86	3229.69	7766.5	3416.13	0.760642	1
ENSMUSG00000090222	Ifi203-ps	60.0318	73.5188	364.186	153.928	2.60861	1
ENSMUSG00000090272	Mndal	1731.9	2467.23	5365.61	3569.55	1.63705	1
ENSMUSG00000016262	Sertad4	10.2184	7.74559	53.841	51.2831	2.40326	1
ENSMUSG00000016200	Syt14	9.49986	6.35998	37.8965	18.6899	1.99915	1
ENSMUSG00000057914	Cacnb2	15.9266	11.2749	32.0718	24.6582	1.01963	1
ENSMUSG00000004113	Cacna1b	55.9146	20.8934	91.5868	50.6366	0.714846	1
ENSMUSG00000039476	Prrx2	17.3807	10.2403	49.8809	17.8603	1.52809	1
ENSMUSG00000026817	Ak1	128.022	76.2652	246.231	133.403	0.949055	1
ENSMUSG00000026866	Kynu	112.946	54.3961	260.049	44.6414	1.20807	1
ENSMUSG00000049744	Arhgap15	161.353	18.1244	229.899	18.8454	0.518063	1
ENSMUSG00000026950	Neb	13.6233	14.801	37.5965	30.2253	1.46395	1
ENSMUSG00000026824	Kcnj3	1.21259	0	18.7486	11.0665	3.97301	1
ENSMUSG00000026826	Nr4a2	44.5475	131.372	73.6948	181.529	0.734672	1
ENSMUSG00000054580	Pla2r1	27.8279	15.9425	118.837	41.1251	2.09952	1
ENSMUSG00000026904	Slc4a10	3.00955	9.04037	13.8509	23.6472	2.21565	1
ENSMUSG00000026896	Ifih1	1341.3	4458.57	2712.97	4544.19	1.02168	1
ENSMUSG00000057182	Scn3a	5.09918	3.63704	40.1036	37.0064	2.98488	1
ENSMUSG00000044647	Csrnp3	6.5633	4.09137	96.9877	63.2962	3.88902	1
ENSMUSG00000064329	Scn1a	2.09508	0.623946	11.9825	11.8666	2.52762	1
ENSMUSG00000070880	Gad1	14.4652	14.7211	154.935	155.396	3.43587	1
ENSMUSG00000041911	Dlx1	40.5761	39.6311	312.248	264.724	2.94853	1
ENSMUSG00000068859	Sp9	11.9159	13.1669	139.977	136.844	3.55547	1
ENSMUSG00000027016	Zfp385b	1.19524	3.04609	12.8292	9.49133	3.433	1
ENSMUSG00000027078	Ube2l6	534.396	1593.65	1310.41	1789.55	1.30029	1
ENSMUSG00000068735	Trp53i11	27.4951	91.6988	116.219	202.126	2.08426	1
ENSMUSG00000040310	Alx4	11.3397	5.47587	73.6952	33.0013	2.70532	1
ENSMUSG00000075020	Mir670hg	1.75221	2.04145	17.3633	10.29	3.29123	1
ENSMUSG00000068373	D430041D05Rik	5.12657	4.33462	61.7088	71.0845	3.60226	1
ENSMUSG00000016386	Mpped2	17.6789	15.4794	178.953	152.021	3.34804	1
ENSMUSG00000086308	G630016G05Rik	1.18793	1.78974	11.6003	8.98957	3.28763	1
ENSMUSG00000040035	Disp2	14.0155	19.7576	32.204	44.5001	1.21064	1
ENSMUSG00000098488	Pla2g4b	24.2083	25.4541	44.8245	23.1911	0.899554	1
ENSMUSG00000060227	Casc4	91.0359	74.4627	216.346	189.451	1.25349	1
ENSMUSG00000060802	B2m	42885.7	67543.4	61848.9	76873.4	0.534116	1
ENSMUSG00000027200	Sema6d	112.903	147.433	179.992	225.824	0.680638	1
ENSMUSG00000027204	Fbn1	261.161	178.482	1041.49	494.94	2.00053	1
ENSMUSG00000027316	Gfra4	24.926	21.3627	48.3671	33.1681	0.962116	1
ENSMUSG00000039943	Plcb4	35.6011	173.981	106.952	220.059	1.59478	1
ENSMUSG00000039913	Pak7	1.48606	0.948191	25.5147	24.2462	4.10117	1
ENSMUSG00000027463	Slc52a3	181.749	43.7004	317.238	55.8941	0.810805	1
ENSMUSG00000060257	Scrt2	5.05444	4.58523	71.0388	50.5413	3.81126	1
ENSMUSG00000051817	Sox12	32.2879	62.921	102.739	102.873	1.67585	1
ENSMUSG00000027612	Mmp24	4.45546	5.3627	50.5676	49.1018	3.49952	1
ENSMUSG00000037771	Slc32a1	3.30309	3.13472	32.1713	28.4011	3.29039	1
ENSMUSG00000053166	Cdh22	52.742	31.3052	81.4713	53.2553	0.635787	1
ENSMUSG00000017667	Zfp334	83.8073	128.449	141.061	168.934	0.7558	1
ENSMUSG00000049401	Ogfr	1390.09	2301.37	2266.92	2341.98	0.710593	1
ENSMUSG00000038932	Tcfl5	2.6466	3.24026	12.128	11.2019	2.19194	1
ENSMUSG00000027581	Stmn3	12.256	9.17155	87.0485	67.6527	2.83276	1
ENSMUSG00000027584	Oprl1	2.1024	1.58713	13.5206	9.63603	2.69927	1
ENSMUSG00000025255	Zfhx4	33.7109	23.7273	140.646	98.3704	2.06808	1
ENSMUSG00000027499	Pkia	36.8603	27.0669	102.854	93.452	1.48921	1
ENSMUSG00000027533	Fabp5	13805.6	4790.78	20855.2	4783.88	0.601093	1
ENSMUSG00000095788	Sirpb1a	216.303	259.38	320.59	431.827	0.575885	1
ENSMUSG00000078780	Gm5150	102.793	65.1269	195.957	247.297	0.937003	1
ENSMUSG00000037661	Gpr160	194.802	32.3805	274.368	38.6728	0.501034	1
ENSMUSG00000105265	Sox2ot	33.0667	27.5136	133.462	111.948	2.01957	1
ENSMUSG00000048332	Lhfp	93.7519	53.4252	211.796	104.265	1.18276	1
ENSMUSG00000027799	Nbea	160.17	266.659	365.063	469.33	1.19533	1
ENSMUSG00000056476	Med12l	66.5915	48.6865	108.193	60.9994	0.705299	1
ENSMUSG00000036362	P2ry13	431.814	87.5093	691.236	136.979	0.686252	1
ENSMUSG00000036353	P2ry12	260.509	44.1621	390.868	76.1095	0.588709	1
ENSMUSG00000048304	Slitrk3	2.96481	3.11127	41.9193	42.0826	3.8213	1
ENSMUSG00000033900	Map9	17.6333	17.0538	92.2159	57.1959	2.39515	1
ENSMUSG00000102692	Dchs2	8.43152	10.6041	106.865	112.524	3.67704	1
ENSMUSG00000027996	Sfrp2	0.914465	1.94437	28.5855	18.7247	4.99424	1
ENSMUSG00000015852	Fcrls	164.764	138.801	387.228	187.144	1.23703	1
ENSMUSG00000059994	Fcrl1	9.54001	2.43824	24.959	1.95577	1.38803	1
ENSMUSG00000028073	Pear1	26.3226	19.5891	113.168	57.445	2.11362	1
ENSMUSG00000032657	Fam189b	41.1769	24.0131	66.1998	32.9483	0.689191	1
ENSMUSG00000028039	Efna3	2.09236	4.75484	11.4718	5.04515	2.46205	1
ENSMUSG00000000794	Kcnn3	309.468	841.809	529.856	856.514	0.783908	1
ENSMUSG00000085006	BC021767	115.342	1.62013	231.108	2.99965	1.00972	1
ENSMUSG00000068876	Cgn	36.5981	6.62558	63.262	6.891	0.793125	1
ENSMUSG00000015947	Fcgr1	3217.76	6160.43	10017.6	11585.7	1.64413	1
ENSMUSG00000027868	Tbx15	13.7055	11.6248	66.6749	40.9254	2.28747	1
ENSMUSG00000053957	Gm12474	7.49512	16.2921	21.7784	10.5681	1.54379	1
ENSMUSG00000002227	Mov10	990.373	2025.35	1897.92	2255.51	0.944457	1
ENSMUSG00000040809	Chil3	682.632	201.904	1055.38	186.41	0.634612	1
ENSMUSG00000056145	AI504432	689.035	1610.3	1029.8	1767.75	0.587153	1
ENSMUSG00000027894	Slc6a17	14.3958	15.7311	65.1429	54.4984	2.18603	1
ENSMUSG00000004035	Gstm7	4.18744	7.02456	15.9799	15.9595	1.94619	1
ENSMUSG00000027966	Col11a1	114.503	51.7132	297.534	174.704	1.38239	1
ENSMUSG00000068696	Gpr88	0.606297	1.83883	20.6113	15.7325	5.11127	1
ENSMUSG00000053931	Cnn3	621.836	385.259	1148.72	755.156	0.890741	1
ENSMUSG00000032854	Ugt8a	1.4614	0.996182	10.2653	7.57782	2.80302	1
ENSMUSG00000059921	Unc5c	27.4202	17.1421	64.9876	69.0903	1.24912	1
ENSMUSG00000105504	Gbp5	107.947	1485.46	497.205	2498.88	2.20919	1
ENSMUSG00000040253	Gbp7	1487.8	4026.08	3282.94	4684.92	1.14763	1
ENSMUSG00000028037	Ifi44	59.1256	530.975	540.962	1003.26	3.19829	1
ENSMUSG00000049119	Fam110b	40.6591	17.6616	84.5241	35.9991	1.0603	1
ENSMUSG00000085295	4930430E12Rik	281.845	204.006	483.357	238.675	0.784386	1
ENSMUSG00000041261	Car8	5.91685	1.66922	18.8664	7.07796	1.66441	1
ENSMUSG00000041058	Wwp1	1535	918.433	2170.02	846.706	0.505756	1
ENSMUSG00000028246	Faxc	24.4782	19.0396	83.9303	91.073	1.78606	1
ENSMUSG00000028289	Epha7	18.4765	22.5198	57.9464	29.8293	1.6534	1
ENSMUSG00000040270	Bach2	77.7052	111.423	109.824	165.519	0.505616	1
ENSMUSG00000091542	Gm17167	6.898	7.096	28.9602	24.1692	2.08097	1
ENSMUSG00000028476	Reck	24.9896	31.5711	44.7681	34.2482	0.849154	1
ENSMUSG00000039853	Trim14	551.645	784.778	890.719	862.374	0.698242	1
ENSMUSG00000063446	Plppr1	2.11975	0	12.3424	7.84704	2.561	1
ENSMUSG00000039137	Whrn	28.2027	77.4045	52.0575	78.3119	0.886649	1
ENSMUSG00000028351	Brinp1	11.0909	20.999	53.9282	81.1246	2.28691	1
ENSMUSG00000028399	Ptprd	33.957	24.7672	84.7561	75.3075	1.3256	1
ENSMUSG00000028487	Bnc2	15.2117	28.4288	33.5988	63.906	1.1467	1
ENSMUSG00000008489	Elavl2	7.7759	6.41561	49.5865	60.6869	2.67582	1
ENSMUSG00000028572	Hook1	85.6926	72.2966	131.119	100.773	0.614595	1
ENSMUSG00000028518	Prkaa2	19.9817	18.3262	46.0514	35.5815	1.20788	1
ENSMUSG00000028698	Pik3r3	119.05	209.968	203.752	253.252	0.78151	1
ENSMUSG00000028643	Svbp	175.079	267.425	280.198	324.047	0.683226	1
ENSMUSG00000052135	Foxo6	5.37265	6.35043	29.8272	23.4805	2.47436	1
ENSMUSG00000090125	Pou3f1	25.1083	17.0377	68.7344	21.5374	1.4566	1
ENSMUSG00000001985	Grik3	34.651	37.321	263.967	297.729	2.93413	1
ENSMUSG00000028859	Csf3r	119.007	815.137	208.262	1267.59	0.809411	1
ENSMUSG00000028794	A3galt2	0.616335	5.62094	10.0736	11.222	4.06897	1
ENSMUSG00000028789	Azin2	26.6326	40.9346	48.5759	60.7838	0.871506	1
ENSMUSG00000028773	Fabp3	290.085	223.758	589.87	184.32	1.02898	1
ENSMUSG00000037731	Themis2	3026.39	2123.82	5115.35	2662.66	0.762576	1
ENSMUSG00000007872	Id3	137.311	196.67	263.257	255.87	0.944343	1
ENSMUSG00000036905	C1qb	9250.26	2926.14	14598.7	4167.41	0.664178	1
ENSMUSG00000036896	C1qc	10611.2	4182.46	17715.9	5223.29	0.745262	1
ENSMUSG00000040616	Tmem51	75.5926	21.8811	107.503	18.3602	0.51421	1
ENSMUSG00000078502	Gm13212	306.879	274.278	443.06	336.26	0.537912	1
ENSMUSG00000029009	Mthfr	2156.62	3301.22	4144.65	3328.93	0.947503	1
ENSMUSG00000028965	Tnfrsf9	31.7226	419.491	89.6425	487.7	1.50707	1
ENSMUSG00000029070	Mxra8	152.863	199.236	220.295	221.511	0.535355	1
ENSMUSG00000035692	Isg15	308.014	4721.2	1839.6	5493.61	2.58385	1
ENSMUSG00000078349	AW011738	12.2341	153.992	56.2427	133.762	2.20075	1
ENSMUSG00000040584	Abcb1a	16.737	429.091	44.679	367.543	1.4278	1
ENSMUSG00000040254	Sema3d	9.25923	7.37115	58.7662	54.2366	2.67143	1
ENSMUSG00000063531	Sema3e	188.493	122.123	378.991	230.739	1.01537	1
ENSMUSG00000061601	Pclo	21.8289	13.8593	85.7069	63.1479	1.98181	1
ENSMUSG00000029163	Emilin1	550.881	230.83	790.249	257.094	0.526	1
ENSMUSG00000029120	Ppp2r2c	2.97943	3.66158	15.3089	16.3367	2.35743	1
ENSMUSG00000029086	Prom1	36.2809	120.224	83.3655	169.234	1.20767	1
ENSMUSG00000044827	Tlr1	528.025	2623.22	746.219	2713.26	0.506262	1
ENSMUSG00000072874	Gm6116	20.8185	2.13854	48.5759	1.57853	1.22448	1
ENSMUSG00000036377	C530008M17Rik	55.0248	42.3008	226.619	186.87	2.04741	1
ENSMUSG00000037605	Adgrl3	138.006	68.1228	208.157	117.004	0.600421	1
ENSMUSG00000029372	Ppbp	17.8217	227.88	55.5016	712.423	1.6465	1
ENSMUSG00000029373	Pf4	3106.69	5996.11	7126.79	7782.56	1.20375	1
ENSMUSG00000034855	Cxcl10	55.1097	3022.93	194.818	4202.09	1.82895	1
ENSMUSG00000060183	Cxcl11	0.598984	36.1841	10.9608	196.47	4.20829	1
ENSMUSG00000105283	Gm33370	36.2092	15.6213	69.0883	24.7936	0.937677	1
ENSMUSG00000035273	Hpse	244.084	88.1779	375.118	94.4743	0.623634	1
ENSMUSG00000029299	Abcg3	160.009	11.5201	261.703	16.954	0.716461	1
ENSMUSG00000034438	Gbp8	460.548	350.145	984.242	349.124	1.10164	1
ENSMUSG00000029298	Gbp9	976.611	2253.35	2869.17	3275.25	1.56024	1
ENSMUSG00000079363	Gbp4	74.1322	684.487	536.629	1372.24	2.85989	1
ENSMUSG00000105096	Gbp10	13.2162	86.9887	102.138	156.871	2.95386	1
ENSMUSG00000033615	Cplx1	1.4961	2.68994	28.7454	25.1214	4.27707	1
ENSMUSG00000070576	Mn1	59.357	45.5073	190.839	162.527	1.68738	1
ENSMUSG00000042216	Sgsm1	16.1435	16.5822	37.0927	34.8472	1.20389	1
ENSMUSG00000042078	Svop	5.96891	2.64085	34.2591	23.6031	2.52542	1
ENSMUSG00000029561	Oasl2	2633.37	6956.2	7026.73	6589.73	1.42153	1
ENSMUSG00000041827	Oasl1	284.745	1766.9	1453.07	2376.64	2.35679	1
ENSMUSG00000063919	Srrm4	10.7708	6.08483	82.2027	72.8078	2.93852	1
ENSMUSG00000001166	Oas1c	99.9592	200.111	192.341	252.386	0.950643	1
ENSMUSG00000029605	Oas1b	73.0128	365.067	259.083	485.323	1.83168	1
ENSMUSG00000066861	Oas1g	1378.44	4966.46	3275.05	5581.94	1.25425	1
ENSMUSG00000052776	Oas1a	1527.5	4459.5	3210.08	4989.78	1.07723	1
ENSMUSG00000029608	Rph3a	7.87269	26.9793	34.3601	40.1141	2.13327	1
ENSMUSG00000029469	Ift81	62.8793	119.941	101.872	113.515	0.706582	1
ENSMUSG00000034118	Tpst1	237.259	351.974	372.765	445.818	0.655946	1
ENSMUSG00000029673	Auts2	34.6492	59.2052	156.215	169.006	2.17539	1
ENSMUSG00000043614	Vps37d	5.64884	4.64931	17.6523	12.8118	1.64651	1
ENSMUSG00000029712	Actl6b	2.40325	1.71721	31.399	32.6025	3.71815	1
ENSMUSG00000029718	Pcolce	58.5942	25.8424	208.295	51.5245	1.83701	1
ENSMUSG00000048988	Elfn1	48.0894	31.4088	96.658	69.4275	1.01032	1
ENSMUSG00000036526	Card11	751.838	53.8806	2082.94	66.4379	1.47716	1
ENSMUSG00000010825	Grid2ip	1.17058	10.6147	34.1173	60.664	4.84046	1
ENSMUSG00000043388	Tmem130	0.29813	1.49004	13.0266	8.2022	5.35297	1
ENSMUSG00000029659	Medag	11.9807	9.48624	27.4536	7.48998	1.20248	1
ENSMUSG00000047735	Samd9l	1817.53	3409.81	4293.82	3906.58	1.24611	1
ENSMUSG00000004631	Sgce	44.8275	51.1833	71.2818	79.2666	0.677622	1
ENSMUSG00000029757	Dync1i1	4.81109	5.43634	35.1702	35.4133	2.88431	1
ENSMUSG00000090063	Dlx6os1_1	31.7072	33.7895	308.754	295.939	3.28922	1
ENSMUSG00000029754	Dlx6	2.07773	3.79166	24.273	19.7592	3.54567	1
ENSMUSG00000000416	Cttnbp2	17.0853	9.95556	63.3848	32.3507	1.89872	1
ENSMUSG00000086763	Plxna4os1	40.104	19.7511	81.7049	41.7823	1.03078	1
ENSMUSG00000029838	Ptn	202.509	80.7034	419.231	232.492	1.0562	1
ENSMUSG00000063455	D630045J12Rik	51.3757	85.5649	202.223	192.648	1.98683	1
ENSMUSG00000038507	Parp12	1547.23	4066.96	3442.59	4423.77	1.15936	1
ENSMUSG00000029923	Rab19	162.044	71.3677	235.022	57.0546	0.539244	1
ENSMUSG00000029862	Clcn1	1.78878	2.91711	10.5153	8.6344	2.55545	1
ENSMUSG00000036667	Tcaf1	1825.53	553.346	2692.63	703.375	0.567173	1
ENSMUSG00000108112	Gm45193	136.066	748.965	307.62	952.556	1.18651	1
ENSMUSG00000029798	Herc6	424.855	2945.74	1181.59	3472.51	1.47981	1
ENSMUSG00000045441	Gprin3	6.61263	0.623946	26.3387	16.4265	2.00463	1
ENSMUSG00000052852	Reep1	30.5027	22.1882	92.5798	76.6037	1.60683	1
ENSMUSG00000108371	Gm38832	4.17468	3.78321	15.4934	5.40032	1.89575	1
ENSMUSG00000047013	Fbxo41	2.39049	2.71339	19.7927	16.9921	3.0582	1
ENSMUSG00000030000	Add2	17.9897	16.21	163.047	159.159	3.1899	1
ENSMUSG00000029999	Tgfa	38.864	23.8083	116.586	41.2237	1.59076	1
ENSMUSG00000030091	Nup210	685.603	416.471	998.08	518.366	0.54799	1
ENSMUSG00000030098	Grip2	5.04254	1.78974	15.4021	13.6025	1.6043	1
ENSMUSG00000072875	Gpr27	4.18472	6.82084	27.5635	19.9791	2.72673	1
ENSMUSG00000042873	Lhfpl4	16.8503	14.7691	66.981	57.1137	2.0022	1
ENSMUSG00000000440	Pparg	498.584	41.7923	856.207	58.9192	0.786568	1
ENSMUSG00000030110	Ret	7.09288	18.8989	40.7846	83.1781	2.51664	1
ENSMUSG00000040797	Iqsec3	3.88659	5.58251	39.0936	34.1496	3.33484	1
ENSMUSG00000040669	Phc1	188.162	260.452	266.345	386.8	0.508131	1
ENSMUSG00000040649	Rimklb	21.6148	24.0527	93.7044	85.1783	2.12365	1
ENSMUSG00000049037	Clec4a1	50.898	1276.06	113.076	2475.36	1.15252	1
ENSMUSG00000008153	Clstn3	10.1563	9.60787	31.1156	20.992	1.61635	1
ENSMUSG00000023191	P3h3	80.4585	94.2371	122.368	78.3251	0.612067	1
ENSMUSG00000038390	Gpr162	24.1518	18.6685	45.6742	35.7699	0.926104	1
ENSMUSG00000023274	Cd4	30.1964	20.7472	56.6987	14.9156	0.918068	1
ENSMUSG00000037997	Parp11	350.527	738.499	933.032	955.936	1.41871	1
ENSMUSG00000097354	2310001H17Rik	56.5548	41.999	104.508	60.0147	0.894631	1
ENSMUSG00000030156	Cd69	23.8445	565.512	58.332	686.937	1.29258	1
ENSMUSG00000030275	Etnk1	1955.06	3453.54	2913.99	3421.2	0.582396	1
ENSMUSG00000030268	Bcat1	60.0226	507.091	209.183	570.752	1.80957	1
ENSMUSG00000030313	Dennd5b	26.6289	27.6172	145.907	133.137	2.46125	1
ENSMUSG00000003452	Bicd1	26.0629	20.8528	56.0724	52.3819	1.11321	1
ENSMUSG00000004961	Syt5	6.04103	3.2659	20.7066	22.6931	1.77782	1
ENSMUSG00000035390	Brsk1	31.1684	31.3194	124.786	106.62	2.00835	1
ENSMUSG00000074361	C5ar2	295.682	37.9523	457.174	54.3578	0.633227	1
ENSMUSG00000108348	Gm42372	6.29715	8.27026	39.483	28.0051	2.65526	1
ENSMUSG00000041117	Ccdc8	23.5993	13.1094	44.5678	24.973	0.915286	1
ENSMUSG00000030410	Dmwd	98.6712	196.117	184.209	281.537	0.905644	1
ENSMUSG00000030406	Gipr	2.09967	32.1383	11.6472	45.2396	2.47106	1
ENSMUSG00000064264	Zfp428	32.8851	52.9679	59.5937	77.2333	0.869326	1
ENSMUSG00000007944	Ttc9b	2.37586	0.396781	18.6683	7.3232	2.97349	1
ENSMUSG00000036882	Arhgap33	70.4364	36.8593	201.382	101.734	1.52288	1
ENSMUSG00000051314	Ffar2	49.6763	4.28553	139.3	4.40059	1.49151	1
ENSMUSG00000030499	Kctd15	21.4458	33.0513	54.3036	68.6839	1.34117	1
ENSMUSG00000001802	Lrp3	19.8333	26.2433	88.0702	67.5809	2.15859	1
ENSMUSG00000043671	Dpy19l3	80.2285	83.4231	154.645	182.425	0.950971	1
ENSMUSG00000044452	Zfp507	28.1114	45.8449	91.2407	101.099	1.70341	1
ENSMUSG00000054676	1600014C10Rik	859.781	1019.1	1937.74	1428.94	1.17787	1
ENSMUSG00000002204	Napsa	283.473	137.379	510.984	243.297	0.854457	1
ENSMUSG00000007783	Cpt1c	82.356	63.993	259.695	283.07	1.66363	1
ENSMUSG00000030796	Tead2	50.6722	55.9576	90.652	96.704	0.8435	1
ENSMUSG00000003863	Ppfia3	19.7311	595.419	41.1312	573.009	1.06214	1
ENSMUSG00000100826	Snhg14	43.7618	38.3521	132.542	97.0708	1.6069	1
ENSMUSG00000102252	Snrpn	50.7488	39.5512	146.768	106.941	1.53358	1
ENSMUSG00000102627	Snurf	8.10414	10.0355	26.5478	17.8805	1.71885	1
ENSMUSG00000033585	Ndn	42.3799	50.8506	112.983	71.855	1.42114	1
ENSMUSG00000030551	Nr2f2	75.3987	66.5616	182.63	129.83	1.28499	1
ENSMUSG00000025789	St8sia2	19.6744	21.6954	131.83	142.685	2.74694	1
ENSMUSG00000059146	Ntrk3	15.5564	18.3485	81.7109	100.304	2.39649	1
ENSMUSG00000039236	Isg20	51.877	337.384	174.92	738.747	1.76085	1
ENSMUSG00000108616	Gm35040	25.7163	18.0189	57.737	49.9296	1.17688	1
ENSMUSG00000057706	Mex3b	63.9932	140.732	141.54	288.277	1.15264	1
ENSMUSG00000052353	Cemip	175.612	109.413	594.383	201.015	1.76478	1
ENSMUSG00000070427	Il18bp	90.1086	156.683	319.977	364.858	1.83178	1
ENSMUSG00000030966	Trim21	298.943	575.16	530.568	788.803	0.83393	1
ENSMUSG00000111737	AC123830.1	47.6351	140.221	133.943	123.761	1.50044	1
ENSMUSG00000052749	Trim30b	54.5738	85.3593	167.957	291.256	1.63298	1
ENSMUSG00000078616	Trim30c	130.9	220.863	417.997	343.991	1.68183	1
ENSMUSG00000030921	Trim30a	3073.41	6406.41	6106.57	6932.11	0.996249	1
ENSMUSG00000036862	Dchs1	154.834	66.3129	385.26	267.958	1.31924	1
ENSMUSG00000078606	Gm4070	5091.45	6947.19	9829.9	7242.99	0.954698	1
ENSMUSG00000045868	Gvin1	13078.8	16334.9	21105.8	14260.3	0.696176	1
ENSMUSG00000031028	Tub	6.90617	8.16582	59.0877	45.2396	3.10219	1
ENSMUSG00000005611	Mrvi1	6.8742	2.26862	18.4187	3.06731	1.42543	1
ENSMUSG00000030772	Dkk3	44.2996	24.3063	91.7407	44.7158	1.05916	1
ENSMUSG00000030757	Zkscan2	9.57013	8.27135	33.2726	27.5569	1.80507	1
ENSMUSG00000060538	Tmem219	371.881	542.303	528.197	539.094	0.511247	1
ENSMUSG00000030683	Sez6l2	4.8065	26.6625	40.7622	98.7105	3.08897	1
ENSMUSG00000030782	Tgfb1i1	72.2977	55.263	159.038	117.137	1.1446	1
ENSMUSG00000006205	Htra1	37.0497	26.3854	150.63	67.2627	2.02887	1
ENSMUSG00000030930	Chst15	42.2201	33.7822	73.7226	36.7447	0.815116	1
ENSMUSG00000025473	Adam8	16347.5	10396.3	23236	12985	0.513028	1
ENSMUSG00000013974	Mcemp1	623.892	807.507	1053.97	919.098	0.7631	1
ENSMUSG00000096014	Sox1	36.1973	30.7947	115.039	103.41	1.67224	1
ENSMUSG00000031443	F7	1309.97	298.07	1962.45	420.533	0.589263	1
ENSMUSG00000031538	Plat	137.733	165.035	270.403	207.271	0.979791	1
ENSMUSG00000097654	Gm26714	44.2964	2.01801	92.4022	1.86792	1.06721	1
ENSMUSG00000063626	Unc5d	3.26294	2.11399	14.0948	11.3794	2.11594	1
ENSMUSG00000031639	Tlr3	418.663	843.572	847.882	1132.25	1.02488	1
ENSMUSG00000031626	Sorbs2	189.268	156.629	288.39	255.096	0.613364	1
ENSMUSG00000038173	Enpp6	4.4883	0.324245	18.35	1.11154	2.02777	1
ENSMUSG00000086866	4930512H18Rik	10.544	56.2283	37.1805	71.5309	1.82388	1
ENSMUSG00000037921	Ddx60	350.489	2382.62	1375.69	2416.15	1.97798	1
ENSMUSG00000036306	Lzts1	5.12657	3.66158	28.7398	21.4678	2.50596	1
ENSMUSG00000031805	Jak3	497.355	451.533	732.025	650.712	0.564494	1
ENSMUSG00000071064	Zfp827	77.3174	272.992	125.267	211.132	0.704139	1
ENSMUSG00000031712	Il15	119.675	115.733	234.218	164.461	0.974048	1
ENSMUSG00000047747	Rnf150	463.102	172.607	822.729	222.003	0.833634	1
ENSMUSG00000013033	Adgrl1	142.505	95.9437	508.933	390.665	1.84111	1
ENSMUSG00000031748	Gnao1	147.06	146.609	486.073	502.444	1.73137	1
ENSMUSG00000097194	9330175E14Rik	73.7967	131.211	119.676	114.967	0.704048	1
ENSMUSG00000074151	Nlrc5	1219.98	2889.95	2006.46	2818.68	0.723361	1
ENSMUSG00000031871	Cdh5	54.7303	91.2821	181.891	270.824	1.7386	1
ENSMUSG00000012519	Mlkl	647.28	1341.57	1271.69	1619.1	0.980177	1
ENSMUSG00000097919	Gm27021	2.07501	7.26452	23.3819	6.52267	3.48454	1
ENSMUSG00000046714	Foxc2	8.34749	16.3551	27.8771	51.2643	1.74126	1
ENSMUSG00000006362	Cbfa2t3	60.9388	6.2299	95.8681	11.9216	0.661635	1
ENSMUSG00000025812	Pard3	45.6213	62.5491	101.56	137.898	1.16134	1
ENSMUSG00000025888	Casp1	748.069	1276.49	1066.57	1594.53	0.517729	1
ENSMUSG00000033538	Casp4	273.82	993.551	417.439	1137.1	0.615585	1
ENSMUSG00000050578	Mmp13	16763.5	18931.7	40355.4	66369	1.27324	1
ENSMUSG00000043613	Mmp3	196.217	485.643	536.062	1262.16	1.45702	1
ENSMUSG00000070323	Mmp27	223.186	346.04	561.765	783.842	1.33693	1
ENSMUSG00000053110	Yap1	94.6206	103.077	208.743	166.835	1.14471	1
ENSMUSG00000032172	Olfm2	44.9132	46.0445	107.903	122.831	1.27145	1
ENSMUSG00000038884	A230050P20Rik	378.843	464.56	564.597	537.99	0.580344	1
ENSMUSG00000003410	Elavl3	31.8985	34.2397	292.108	281.196	3.19805	1
ENSMUSG00000041444	Arhgap32	83.5846	115.697	196.443	173.704	1.23782	1
ENSMUSG00000032024	Clmp	239.754	2208.46	342.337	1126.09	0.520189	1
ENSMUSG00000032012	Nectin1	61.889	44.5408	136.583	108.916	1.14476	1
ENSMUSG00000109675	Nxpe1-ps	21.4969	0.721027	59.168	1.25624	1.46098	1
ENSMUSG00000039542	Ncam1	192.184	231.877	700.558	787.478	1.8709	1
ENSMUSG00000032311	Nrg4	68.6929	57.6969	104.663	142.938	0.608842	1
ENSMUSG00000032333	Stoml1	311.242	414.637	448.644	497.785	0.533191	1
ENSMUSG00000032334	Loxl1	110.374	87.7035	345.742	197.951	1.65383	1
ENSMUSG00000032338	Hcn4	1.80427	0.923646	18.9706	19.7263	3.40142	1
ENSMUSG00000041729	Coro2b	74.1167	30.705	143.612	75.9103	0.961954	1
ENSMUSG00000032243	Itga11	3.56107	3.43442	21.0121	9.12346	2.56023	1
ENSMUSG00000032387	Rbpms2	16.7042	33.6786	33.1517	41.3614	0.989717	1
ENSMUSG00000013584	Aldh1a2	70.93	14.6379	227.652	49.4077	1.68546	1
ENSMUSG00000032216	Nedd4	1000.29	917.184	2424.79	1915.17	1.28385	1
ENSMUSG00000032348	Gsta4	23.3478	17.2956	63.9871	14.2912	1.46191	1
ENSMUSG00000032265	Fam46a	1072	2509.58	1686.1	2710.21	0.660413	1
ENSMUSG00000035274	Tpbg	38.1216	157.414	93.5353	186.677	1.30182	1
ENSMUSG00000032363	Adamts7	20.0493	94.7692	81.5765	136.653	2.02948	1
ENSMUSG00000032374	Plod2	128.429	194.114	283.771	327.47	1.15191	1
ENSMUSG00000045414	1190002N15Rik	297.624	254.804	435.499	311.372	0.5541	1
ENSMUSG00000045322	Tlr9	202.339	196.919	393.812	265.672	0.964979	1
ENSMUSG00000039716	Dock3	23.9212	25.1288	78.9355	63.9864	1.73039	1
ENSMUSG00000032596	Uba7	802.323	1981.71	1906.32	2510.67	1.2549	1
ENSMUSG00000062296	Trank1	5.03982	20.3259	28.7703	32.0143	2.51029	1
ENSMUSG00000010651	Acaa1b	8.747	1.36952	30.0784	5.83632	1.78911	1
ENSMUSG00000097572	Gm26797	14.6666	34.9319	43.9942	39.1506	1.59943	1
ENSMUSG00000035448	Ccr3	3.60853	2.26862	21.6928	8.36708	2.5911	1
ENSMUSG00000097597	Gm26674	7.16229	7.88956	18.5175	17.3384	1.37093	1
ENSMUSG00000060487	Samd5	34.6063	30.4372	76.8121	42.2108	1.15565	1
ENSMUSG00000039531	Zufsp	499.397	1036.56	778.233	1012.58	0.645922	1
ENSMUSG00000046031	Fam26f	9.55736	32.1151	25.067	23.2333	1.40212	1
ENSMUSG00000019846	Lama4	102.276	102.496	243.374	264.456	1.25781	1
ENSMUSG00000087177	E130307A14Rik	54.3158	85.1978	83.8751	94.3888	0.631655	1
ENSMUSG00000019831	Wasf1	15.0588	11.8754	59.0075	49.8854	1.98064	1
ENSMUSG00000045886	Gm9803	55.3393	106.825	93.6232	77.0162	0.761409	1
ENSMUSG00000097134	1110002J07Rik	9.56281	7.89802	23.2069	21.2682	1.27489	1
ENSMUSG00000001665	Gstt3	39.2041	106.776	70.0165	128.634	0.844123	1
ENSMUSG00000001663	Gstt1	9.30125	69.807	26.3799	121.9	1.5086	1
ENSMUSG00000020241	Col6a2	141.725	68.6903	492.912	129.532	1.80375	1
ENSMUSG00000001119	Col6a1	279.094	153.191	745.782	231.621	1.42388	1
ENSMUSG00000020312	Shc2	23.2528	16.4072	44.2766	39.8909	0.929627	1
ENSMUSG00000020331	Hcn2	13.4996	32.4211	30.4236	51.8581	1.18306	1
ENSMUSG00000035852	Misp	2.09508	5.12708	19.1904	18.7012	3.20305	1
ENSMUSG00000034958	Atcay	10.6941	8.95938	90.1117	64.1898	3.07518	1
ENSMUSG00000034818	Celf5	16.7845	7.92256	117.625	105.239	2.82114	1
ENSMUSG00000059602	Syn3	7.71108	5.70304	26.4432	24.8171	1.77856	1
ENSMUSG00000020052	Ascl1	17.9496	3.60403	35.6667	14.1151	0.987973	1
ENSMUSG00000053825	Ppfia2	3.61585	3.97737	32.8926	41.0476	3.19207	1
ENSMUSG00000040033	Stat2	3149.18	8878.84	8954.03	9373.93	1.51319	1
ENSMUSG00000034570	Inpp5j	17.368	5.65504	50.8148	25.526	1.55733	1
ENSMUSG00000048834	Vstm2a	94.3608	6.5307	173.192	27.9031	0.882047	1
ENSMUSG00000020160	Meis1	138.83	72.7433	204.057	128.094	0.561065	1
ENSMUSG00000000861	Bcl11a	21.1806	23.2441	235.524	223.889	3.47715	1
ENSMUSG00000020436	Gabrg2	1.18793	0.899101	12.2328	9.91083	3.35567	1
ENSMUSG00000020415	Pttg1	254.188	488.655	442.151	606.156	0.80557	1
ENSMUSG00000057098	Ebf1	3.01959	12.4609	18.5097	18.8586	2.63813	1
ENSMUSG00000046879	Irgm1	1200.27	2932.49	3052.49	3112.57	1.35226	1
ENSMUSG00000058163	Gm5431	614.068	732.129	1412.91	978.305	1.20793	1
ENSMUSG00000040328	Olfr56	37.4007	273.287	181.639	432.994	2.28605	1
ENSMUSG00000078921	Tgtp2	11.1827	107.757	205.324	318.323	4.20554	1
ENSMUSG00000078920	Ifi47	139.054	380.269	447.721	480.678	1.69524	1
ENSMUSG00000020363	Gfpt2	34.4541	37.2507	90.7928	71.6393	1.4106	1
ENSMUSG00000020377	Ltc4s	121.067	6.00383	205.123	3.37879	0.7696	1
ENSMUSG00000044807	Zfp354c	37.0917	30.2419	120.765	78.9297	1.70604	1
ENSMUSG00000048728	Zfp454	2.71142	2.29206	13.2652	6.35636	2.30559	1
ENSMUSG00000042377	Fam83g	10.5385	32.5907	27.679	69.9871	1.40522	1
ENSMUSG00000040829	Zmynd15	34.0849	685.835	57.5308	995.559	0.756747	1
ENSMUSG00000092528	Nlrp1c-ps	57.6522	9.25908	96.2307	9.15634	0.740817	1
ENSMUSG00000035373	Ccl7	2749.27	11298.5	5261.82	10462	0.942041	1
ENSMUSG00000009185	Ccl8	13.0892	11.8359	106.023	72.5438	3.02174	1
ENSMUSG00000054404	Slfn5	4992.66	8197.44	11744.4	8163.76	1.23969	1
ENSMUSG00000035208	Slfn8	1124.75	4240.61	2983.42	4568.05	1.41291	1
ENSMUSG00000072621	Slfn10-ps	578.538	968.801	833.3	1088.44	0.531908	1
ENSMUSG00000072620	Slfn2	6207.74	10495.6	9406.66	11040.3	0.605273	1
ENSMUSG00000078763	Slfn1	268.372	2142.02	1125.89	3462.98	2.0734	1
ENSMUSG00000000204	Slfn4	235.462	5939.66	2736	12454.6	3.54393	1
ENSMUSG00000018986	Slfn3	311.315	290.064	643.195	253.031	1.05204	1
ENSMUSG00000035042	Ccl5	35.5747	2520.57	107.495	7097.85	1.60332	1
ENSMUSG00000020868	Xylt2	727.141	1436.94	1172.14	2143.17	0.6933	1
ENSMUSG00000047181	Samd14	39.0735	33.0194	112.071	87.022	1.52436	1
ENSMUSG00000062312	Erbb2	33.2499	25.1288	61.4806	54.6472	0.89697	1
ENSMUSG00000019312	Grb7	23.2309	1.96892	80.9436	5.56709	1.80564	1
ENSMUSG00000006931	P3h4	39.7091	33.6349	83.8333	56.3644	1.08525	1
ENSMUSG00000001555	Fkbp10	97.8183	68.539	247.761	150.421	1.3451	1
ENSMUSG00000085604	Dhx58os	2.94746	15.9103	11.8207	16.4795	1.99393	1
ENSMUSG00000052373	Mpp3	2.38317	4.75484	17.0318	9.95831	2.8348	1
ENSMUSG00000050288	Fzd2	21.197	15.6052	59.8792	41.3027	1.50518	1
ENSMUSG00000020695	Mrc2	78.6096	39.8381	352.402	171.9	2.17198	1
ENSMUSG00000040528	Milr1	819.499	1947.49	1204.02	2360	0.561034	1
ENSMUSG00000043857	Mgat5b	6.32726	4.65776	60.3231	44.4302	3.26465	1
ENSMUSG00000025576	Rbfox3	3.9514	0.948191	19.5206	6.7336	2.32109	1
ENSMUSG00000005043	Sgsh	140.85	144.261	303.495	196.292	1.11325	1
ENSMUSG00000070327	Rnf213	16663.2	45241.8	38647.8	40149.1	1.21934	1
ENSMUSG00000109408	A930037H05Rik	44.4434	97.7319	105.457	106.481	1.24904	1
ENSMUSG00000042988	Notum	7.45038	6.32588	20.7117	8.51178	1.47582	1
ENSMUSG00000020654	Adcy3	392.071	148.031	656.151	151.101	0.746947	1
ENSMUSG00000112276	AC117236.1	22.9702	22.7407	41.0025	21.1916	0.841202	1
ENSMUSG00000020638	Cmpk2	484.264	5477.24	1988.31	5840.64	2.04387	1
ENSMUSG00000061911	Myt1l	8.68305	9.13745	121.419	133.829	3.81265	1
ENSMUSG00000035799	Twist1	16.3722	10.5539	55.1376	28.1066	1.76001	1
ENSMUSG00000021071	Trim9	40.5997	14.2891	101.654	77.2868	1.32907	1
ENSMUSG00000021253	Tgfb3	44.1033	55.0007	71.4201	75.6867	0.703451	1
ENSMUSG00000021194	Chga	2.39049	3.5315	23.5831	18.0708	3.30602	1
ENSMUSG00000079017	Ifi27l2a	1083.01	546.369	2767.84	753.223	1.3595	1
ENSMUSG00000021260	Hhipl1	12.3117	50.3036	28.4173	56.5753	1.21446	1
ENSMUSG00000058070	Eml1	64.8439	53.0233	132.311	76.5647	1.03431	1
ENSMUSG00000021268	Meg3	92.5986	100.744	596.968	487.069	2.6938	1
ENSMUSG00000097391	Mirg	0.581634	2.78703	12.0461	10.5775	4.34839	1
ENSMUSG00000002799	Jag2	3.00955	4.68231	22.2205	12.9251	2.88936	1
ENSMUSG00000093765	Gm20658	71.1436	21.9215	103.341	21.4496	0.546873	1
ENSMUSG00000048562	Sp8	8.38219	4.31853	64.166	56.3061	2.9459	1
ENSMUSG00000021214	Akr1c18	4.14815	4.22798	20.8947	43.2147	2.33662	1
ENSMUSG00000079092	Prl2c2	3.86737	0	32.9365	0.466981	3.09456	1
ENSMUSG00000005397	Nid1	340.291	317.208	981.72	640.083	1.53497	1
ENSMUSG00000079049	Serpinb1c	18.5084	1.11781	45.3949	1.28913	1.30075	1
ENSMUSG00000112963	AL513022.1	46.8438	53.9799	77.8577	42.4763	0.73921	1
ENSMUSG00000039114	Nrn1	31.1118	26.3843	52.979	77.3615	0.778123	1
ENSMUSG00000021423	Ly86	1217.39	754.976	2026.98	736.2	0.741946	1
ENSMUSG00000021364	Elovl2	5.08455	8.39298	23.0088	32.0232	2.18215	1
ENSMUSG00000037816	Fbxw17	516.391	622.512	882.136	700.458	0.778433	1
ENSMUSG00000021481	Zfp346	254.077	386.312	365.256	399.506	0.528065	1
ENSMUSG00000114635	CT010498.2	8.6429	13.7483	24.4814	23.0322	1.5122	1
ENSMUSG00000021536	Adcy2	7.52523	12.9057	28.4104	30.8553	1.92519	1
ENSMUSG00000052981	Ube2ql1	8.57622	11.0595	33.2222	33.428	1.95036	1
ENSMUSG00000021589	Rhobtb3	66.9616	67.9578	172.487	142.563	1.37032	1
ENSMUSG00000050334	C130071C03Rik	25.999	33.4822	105.054	126.519	2.02091	1
ENSMUSG00000114055	AC148334.2	154.539	289.179	248.344	519.228	0.688479	1
ENSMUSG00000021624	Cd180	2393.9	1540.62	4272.25	1453.66	0.840896	1
ENSMUSG00000021700	Rab3c	7.76127	7.33925	115.663	86.6451	3.90217	1
ENSMUSG00000114608	AC238811.2	230.256	1041.27	334.917	1028.96	0.547298	1
ENSMUSG00000094796	BC147527	11.0553	11.5672	54.5568	23.5923	2.31008	1
ENSMUSG00000021745	Ptprg	98.9579	94.1935	170.838	162.461	0.796268	1
ENSMUSG00000054423	Cadps	28.9556	25.2452	199.229	189.425	2.78665	1
ENSMUSG00000114230	AC156025.1	1.75221	0.899101	12.7599	14.0714	2.8577	1
ENSMUSG00000056296	Synpr	7.73847	6.67577	54.5646	33.9151	2.81764	1
ENSMUSG00000063142	Kcnma1	4.7837	30.7753	16.2761	24.9913	1.78111	1
ENSMUSG00000040640	Erc2	51.5049	13.4721	99.5376	48.1354	0.95598	1
ENSMUSG00000021994	Wnt5a	59.1091	60.7858	162.501	139.967	1.46486	1
ENSMUSG00000021803	Cdhr1	1.78419	1.59668	12.5515	2.33301	2.81307	1
ENSMUSG00000072601	Ear1	4.21483	1.4985	20.6859	0.844222	2.30898	1
ENSMUSG00000037712	Fermt2	194.56	370.372	329.379	493.629	0.766007	1
ENSMUSG00000051969	Tlr11	10.9795	0.2997	32.0604	0.789263	1.54974	1
ENSMUSG00000021871	Pnp	2029.18	2988.89	3776.9	4075.14	0.902485	1
ENSMUSG00000021876	Rnase4	1091.21	340.357	1609.42	434.295	0.567062	1
ENSMUSG00000094562	Trav13-4-dv7	1.77688	0	13.0322	0	2.87887	1
ENSMUSG00000022176	Rem2	0.879763	1.19034	17.738	25.0482	4.32369	1
ENSMUSG00000022208	Jph4	5.95701	6.05183	43.7883	36.2815	2.87865	1
ENSMUSG00000022216	Psme1	1478.38	1946.58	2150.7	1974.97	0.546084	1
ENSMUSG00000044703	Phf11a	80.2285	330.135	248.298	651.888	1.63915	1
ENSMUSG00000091649	Phf11b	617.944	2467.91	1915.07	4295.3	1.63777	1
ENSMUSG00000071350	Setdb2	312.452	626.274	457.641	677.749	0.554238	1
ENSMUSG00000021273	Fdft1	265.69	191.337	459.641	172.288	0.796623	1
ENSMUSG00000097545	Mir124a-1hg	15.5911	11.837	159.43	143.2	3.36471	1
ENSMUSG00000034463	Scara3	93.1813	40.9603	138.168	30.7393	0.576273	1
ENSMUSG00000046204	Pnma2	4.50751	1.54759	15.704	17.4778	1.80218	1
ENSMUSG00000022014	Epsti1	922.415	1517.77	2059.3	2038.83	1.16458	1
ENSMUSG00000035566	Pcdh17	26.0583	52.828	78.8725	93.0475	1.60446	1
ENSMUSG00000033214	Slitrk5	12.3482	14.3221	31.4229	25.8173	1.35663	1
ENSMUSG00000042156	Dzip1	44.2632	30.6431	122.486	89.666	1.47348	1
ENSMUSG00000041703	Zic5	14.9428	24.3022	47.5233	34.9482	1.682	1
ENSMUSG00000000197	Nalcn	8.69222	8.77367	25.1678	24.9345	1.53861	1
ENSMUSG00000032925	Itgbl1	1.20528	2.71449	11.0074	10.7349	3.21058	1
ENSMUSG00000022148	Fyb	1327.59	9140.6	2367.06	10691.5	0.839676	1
ENSMUSG00000047497	Adamts12	14.6035	6.69076	41.9606	21.7502	1.52792	1
ENSMUSG00000022231	Sema5a	20.0593	18.933	98.9986	150.466	2.30939	1
ENSMUSG00000038984	Tspyl5	2.40053	2.98964	12.4712	11.3137	2.3797	1
ENSMUSG00000063727	Tnfrsf11b	15.5491	12.9463	33.9618	23.7464	1.1425	1
ENSMUSG00000022586	Ly6i	9.52539	54.5709	23.7267	170.31	1.32355	1
ENSMUSG00000075602	Ly6a	10.4444	3.85574	221.87	39.6927	4.4146	1
ENSMUSG00000048385	Scrt1	6.9436	7.87457	84.8646	74.7978	3.62498	1
ENSMUSG00000033565	Rbfox2	312.303	684.994	770.131	1074.26	1.30716	1
ENSMUSG00000068246	Apol9b	13.7987	182.412	224.746	588.471	4.03377	1
ENSMUSG00000019146	Cacng2	1.46871	0.923646	10.6312	7.902	2.83931	1
ENSMUSG00000042428	Mgat3	20.6738	14.2741	83.1138	52.761	2.01581	1
ENSMUSG00000042351	Grap2	5.64611	0.623946	21.814	0	1.94487	1
ENSMUSG00000042109	Csdc2	68.9281	37.1632	112.281	78.9865	0.70815	1
ENSMUSG00000022456	Sept3	24.7937	23.7838	255.731	211.858	3.37238	1
ENSMUSG00000016763	Scube1	4.76907	1.52305	26.8462	10.9125	2.48801	1
ENSMUSG00000018865	Sult4a1	5.06993	3.2648	27.946	20.4132	2.46688	1
ENSMUSG00000055745	Ldoc1l	60.6235	72.9516	92.6387	89.1642	0.623388	1
ENSMUSG00000036218	Pdzrn4	2.06497	3.43442	13.2599	9.41286	2.6742	1
ENSMUSG00000022994	Adcy6	90.6177	74.9802	215.733	160.883	1.26031	1
ENSMUSG00000023034	Nr4a1	30.0156	383.733	73.9353	238.753	1.30285	1
ENSMUSG00000023046	Igfbp6	4.44814	5.55796	26.594	8.82136	2.58078	1
ENSMUSG00000037972	Snn	328.433	143.021	473.48	268.403	0.533532	1
ENSMUSG00000044117	2900011O08Rik	18.2377	23.4181	50.4886	63.199	1.4781	1
ENSMUSG00000012017	Scarf2	78.0115	54.0418	129.13	84.6556	0.734071	1
ENSMUSG00000050761	Gp1bb	3.01686	1.96892	14.7626	10.211	2.30019	1
ENSMUSG00000033355	Rtp4	973.043	2217.17	2544.62	2439.92	1.39254	1
ENSMUSG00000049502	Dtx3l	1523.75	3939.15	3254.56	4461.17	1.10056	1
ENSMUSG00000022906	Parp9	1088.65	2392.86	2055.89	2432.76	0.922393	1
ENSMUSG00000047261	Gap43	52.1121	39.4541	140.151	133.338	1.43283	1
ENSMUSG00000033149	Phldb2	112.659	100.158	406.699	313.001	1.85697	1
ENSMUSG00000022754	Tmem45a	6.89341	7.94601	24.7893	16.7454	1.85564	1
ENSMUSG00000052504	Epha3	3.27025	1.96892	16.2242	10.8025	2.31534	1
ENSMUSG00000002489	Tiam1	90.2548	29.2938	184.481	87.4556	1.03283	1
ENSMUSG00000062609	Kcnj15	4.16464	1.41751	19.3638	1.11154	2.2204	1
ENSMUSG00000050272	Dscam	13.4868	10.5964	78.3323	68.6524	2.54532	1
ENSMUSG00000000386	Mx1	306.432	1601.9	2024.58	2845.14	2.72927	1
ENSMUSG00000023341	Mx2	112.169	977.587	457.448	1218.2	2.03167	1
ENSMUSG00000038347	Tcte2	7.18695	7.42134	22.6717	19.2265	1.66148	1
ENSMUSG00000068036	Afdn	277.72	359.556	435.006	426.607	0.655001	1
ENSMUSG00000052270	Fpr2	290.901	1676.72	410.079	1870.37	0.502829	1
ENSMUSG00000062012	Zfp13	15.9166	14.7434	35.1126	20.5452	1.15103	1
ENSMUSG00000084862	Gm16278	26.1259	21.1132	50.72	20.4808	0.967692	1
ENSMUSG00000040276	Pacsin1	3.01686	2.56832	18.1278	12.6578	2.60232	1
ENSMUSG00000064147	Rab44	51.5865	16.2111	88.4201	29.4836	0.786803	1
ENSMUSG00000024013	Fgd2	144.067	9.31663	254.264	21.0483	0.828158	1
ENSMUSG00000024019	Cmtr1	1281.21	2565.26	1980.23	2860.36	0.635153	1
ENSMUSG00000092412	Gm20507	48.6396	13.8465	90.6018	11.565	0.899062	1
ENSMUSG00000002289	Angptl4	166.242	54.3192	298.804	72.8224	0.854677	1
ENSMUSG00000002307	Daxx	947.468	1846.81	1724.8	1955.33	0.870077	1
ENSMUSG00000061232	H2-K1	10612.6	26754.5	16921.2	33748.3	0.678752	1
[truncated: 81 more rows]
