# Supplementary material for: Transcriptomic Analysis of the Effects of Chemokine Receptor CXCR3 Deficiency on Immune Responses in the Mouse Brain during Toxoplasma gondii Infection
Source: Microorganisms. 2021 Nov 12;9(11):2340. doi: 10.3390/microorganisms9112340 (PMC8620038; doi:10.3390/microorganisms9112340)
Supplement: Supplementary file 1 [file microorganisms-09-02340-s001.zip › TableS2_Primers.xlsx]

## Sheet: Sheet1
Table S5. Primer sequences used in RT-qPCR.
Gene	Primer sequences (5’ to 3’)
Cd83	Forward	CCAAGGAAGCTACAGAGTCAAC
	Reverse	AGAGCAACACAGCTTCTGCC
Cxcl1	Forward	CAATGAGCTGCGCTGTCAGT
	Reverse	TTGAGGTGAATCCCAGCCAT
Cxcl9	Forward	ACCTCAAACAGTTTGCCCCA
	Reverse	TTCACATTTGCCGAGTCCG
Cxcl10	Forward	TGCCGTCATTTTCTGCCTCA
	Reverse	TCACTGGCCCGTCATCGATAT
Cxcl11	Forward	TAACGGCTGCGACAAAGTTGA
	Reverse	CCTGCATTATGAGGCGAGCTT
Cyb5r1	Forward	CAGGAATCACCCCAATGCTG
	Reverse	CAGGGACTTTCAAGATGGCC
Dusp15	Forward	TCGCCTATGTGATGACGGTG
	Reverse	CTTCCAGCACTTCCTGCCA
Gadd45b	Forward	TGAATGTGGACCCCGACAG
	Reverse	CTTCGTCTATGGCCAGGAGG
Gapdh	Forward	TGTGTCCGTCGTGGATCTGA
	Reverse	CCTGCTTCACCACCTTCTTGAT
Gbp5	Forward	TTCACATGCCAGAACCCTTG
	Reverse	CTAGGTGTCCCTCGGTGCTC
Il6	Forward	TTCCATCCAGTTGCCTTCTTG
	Reverse	GAAGGCCGTGGTTGTCACC
Il12b	Forward	CGCAGCAAAGCAAGATGTGT
	Reverse	TGGCAAACCAGGAGATGGTT
Nos2	Forward	CATTGGAAGTGAAGCGTTTCG
	Reverse	CAGCTGGGCTGTACAAACCTT
Ppfibp2	Forward	GGGACACCCTGGCTATGCTT
	Reverse	TGAGGAGCGTCTTCTGTGGG
Ptgs2	Forward	CCAGCACTTCACCCATCAGTT
	Reverse	CCCAGGTCCTCGCTTATGATC
Spib	Forward	TGCAAGCCCTTCAGTTACCC
	Reverse	CCATGTAGAGTCAAGGCCCC
Tlr2	Forward	CAGCTGGAGAACTCTGACCC
	Reverse	CAAAGAGCCTGAAGTGGGAG
Tnfsf15	Forward	ATCACATTCCGAGGGACCAC
	Reverse	TCTCCCCCGACTGATGTCAC
Ube2ql1	Forward	TCTTCGACTGGAACGTGAAGC
	Reverse	ACAGCACCGAGTCCTTGTCC
Vnn3	Forward	GCAGAGGTTAACTGGAGCGC
	Reverse	CGATGAGAACGGCTTCACAG
