# Supplementary material for: Transcriptomic Analysis of the Effects of Chemokine Receptor CXCR3 Deficiency on Immune Responses in the Mouse Brain during Toxoplasma gondii Infection
Source: Microorganisms. 2021 Nov 12;9(11):2340. doi: 10.3390/microorganisms9112340 (PMC8620038; doi:10.3390/microorganisms9112340)
Supplement: Supplementary file 1 [file microorganisms-09-02340-s001.zip › TableS3_DEG.xlsx]

## Sheet: Astrocyte
DEGs whose upregulation during T. gondii infection was impaired by CXCR3-deficiency in astrocytes.
id	Symbol	uninfected WT vs infected WT		uninfected KO vs infected KO		uninfected WT vs uninfected KO		infected WT vs infected KO		Fold change between "uninfected WT vs infected WT" vs "uninfected KO vs infected KO"	mean iDEGES-normalized count
		log2FoldChange	FDR	log2FoldChange	FDR	log2FoldChange	FDR	log2FoldChange	FDR		uninfected WT	infected WT	uninfected KO	infected KO
ENSMUSG00000020826	Nos2	8.81509	0	8.30821	3.38181e-194	-1.07016	0.519967	-1.57634	2.90507e-50	0.703745	8.75251	4037.6	4.12183	1332.65
ENSMUSG00000052981	Ube2ql1	1.98508	4.61049e-182	0.579816	0.0920189	-0.0689932	1	-1.45504	1.29767e-31	0.377549	199.791	802.699	190.763	289.809
ENSMUSG00000027995	Tlr2	6.16022	0	4.84565	1.30004e-162	0.387232	0.548083	-0.909101	4.48245e-22	0.402046	29.0137	2127.83	38.4327	1115.19
ENSMUSG00000097033	Gm26819	1.29256	1.5111e-24	-0.342604	1	-0.321955	0.408043	-1.92149	2.21342e-20	0.321933	75.817	188.544	60.6574	47.5933
ENSMUSG00000105096	Gbp10	7.8529	0	6.73881	7.3158e-130	0.0220158	1	-1.09207	1.36529e-18	0.461983	4.62731	1084.1	4.73031	499.852
ENSMUSG00000104713	Gbp6	6.54647	0	6.01231	3.08685e-208	-0.354482	0.678369	-0.86411	2.7869e-18	0.690563	62.6754	5926.25	49.6404	3202.37
ENSMUSG00000008193	Spib	7.62729	0	7.19786	8.92803e-76	-0.830025	1	-1.2244	8.5891e-18	0.742556	2.5523	532.961	1.12266	225.779
ENSMUSG00000042662	Dusp15	3.08547	1.30912e-155	2.37496	1.58505e-16	-0.716289	0.0750273	-1.40814	1.23763e-17	0.611105	40.4274	347.081	24.2463	130.273
ENSMUSG00000015312	Gadd45b	2.83583	0	2.278	2.15865e-36	-0.263357	0.494875	-0.798326	4.44079e-15	0.679321	195.954	1418.73	162.851	804.089
ENSMUSG00000105504	Gbp5	7.76186	0	6.97452	3.53734e-270	-0.0104112	1	-0.773451	2.88391e-14	0.579413	24.9383	5533.16	25.0164	3183.91
ENSMUSG00000022951	Rcan1	1.33499	9.0245e-224	0.970384	1.20206e-12	-0.332492	0.00729331	-0.67264	1.4529e-13	0.776678	878.401	2248.06	696.5	1387.2
ENSMUSG00000067212	H2-T23	3.40572	0	2.64615	1.30737e-29	-0.234604	1	-0.961506	1.5778e-13	0.590674	77.3679	831.456	67.0128	419.444
ENSMUSG00000021281	Tnfaip2	5.30071	0	4.46181	3.23116e-196	0.171555	0.62432	-0.643399	6.00714e-11	0.559071	285.806	11429.1	321.717	7200.81
ENSMUSG00000050737	Ptges	1.81359	1.62413e-140	0.741569	2.88883e-05	0.338173	0.059862	-0.712331	9.79456e-10	0.475651	191.139	682.959	240.729	410.137
ENSMUSG00000032690	Oas2	5.62491	2.31805e-139	5.44499	5.4201e-42	-0.917284	0.951043	-1.06929	9.8347e-10	0.88275	3.62907	189.135	2.01933	88.3389
ENSMUSG00000024339	Tap2	1.86607	0	1.54506	1.85247e-28	-0.286032	0.0492533	-0.584651	3.76584e-09	0.800512	406.678	1505.39	332.313	987.196
ENSMUSG00000018459	Slc13a3	1.21692	1.31484e-149	0.92228	9.30381e-06	-0.360544	0.101597	-0.63377	1.12187e-08	0.815276	569.735	1343.76	443.313	853.97
ENSMUSG00000026483	Fam129a	1.07952	1.40346e-76	0.412922	0.113386	-0.0710698	1	-0.713486	2.44588e-08	0.629989	383.871	823.789	364.489	492.829
ENSMUSG00000020866	Cacna1g	1.07597	1.83731e-36	0.65429	0.00850987	-0.393091	0.0384565	-0.791965	4.38771e-08	0.746554	159.682	342.094	121.903	195.133
ENSMUSG00000024778	Fas	1.04413	1.255e-115	0.8738	5.11894e-08	-0.406223	0.00243306	-0.549113	1.15929e-07	0.888639	612.391	1281.55	463.665	861.152
ENSMUSG00000032174	Icam5	2.14317	1.17576e-58	1.46664	1.06747e-07	-0.275327	1	-0.91615	4.79539e-07	0.625667	42.4042	190.488	35.9222	99.206
ENSMUSG00000096727	Psmb9	3.37933	5.56924e-197	3.2041	6.13978e-31	-0.565964	0.254641	-0.722252	5.86337e-07	0.885626	36.3465	383.832	23.6378	230.221
ENSMUSG00000054136	Adm2	2.3017	3.82564e-35	1.43116	0.000105321	-0.29726	1	-1.14662	1.10253e-06	0.546942	21.4782	107.411	17.317	48.3737
ENSMUSG00000055172	C1ra	2.38968	3.50802e-129	1.97755	9.34126e-20	-0.293216	0.634578	-0.688462	1.70253e-06	0.751516	72.8519	388.761	59.081	238.564
ENSMUSG00000032911	Cspg4	1.40759	0	1.04492	4.25948e-12	-0.187595	0.326213	-0.527772	2.4054e-06	0.777725	1884.36	5072.69	1651.76	3463.79
ENSMUSG00000037225	Fgf2	1.38434	0	0.972929	5.50649e-10	-0.128438	0.989641	-0.514316	2.42665e-06	0.751887	1058.47	2803.18	967.143	1929.35
ENSMUSG00000052852	Reep1	1.12317	3.00286e-199	0.559683	0.000277838	0.0945161	1	-0.444655	3.55846e-06	0.676666	858.842	1898.4	916.418	1372.43
ENSMUSG00000036661	Dennd3	1.85495	1.25903e-84	1.33353	2.81313e-11	-0.168876	1	-0.671643	3.92445e-06	0.696685	91.6572	337.51	81.3191	209.217
ENSMUSG00000097660	Gm26762	1.08006	6.81734e-15	0.370916	0.697591	-0.0992301	1	-0.789059	4.12888e-06	0.611684	162.474	347.995	150.516	199.35
ENSMUSG00000030921	Trim30a	5.58401	0	5.1938	3.16204e-158	-0.109371	1	-0.47639	6.49944e-06	0.763017	38.9715	1906.17	35.6203	1346.59
ENSMUSG00000044786	Zfp36	2.32666	0	1.92056	2.20236e-16	-0.350904	0.140001	-0.73767	2.34625e-05	0.754665	227.974	1159.86	177.911	686.188
ENSMUSG00000029298	Gbp9	4.72582	0	4.25922	4.30687e-138	-0.0210284	1	-0.467077	2.51823e-05	0.723667	95.7351	2581.16	93.2351	1835.99
ENSMUSG00000041515	Irf8	1.5444	5.59369e-24	0.745953	0.100845	-0.212411	1	-0.982306	2.56469e-05	0.574967	44.7643	132.981	39.1221	66.4724
ENSMUSG00000026822	Lcn2	9.89946	0	9.11773	0	0.243027	1	-0.519126	2.57481e-05	0.581667	8.9943	8834.7	10.83	6066.35
ENSMUSG00000025938	Slco5a1	1.82883	1.46109e-106	1.22613	8.2682e-12	0.0303918	1	-0.54678	4.43142e-05	0.658521	120.596	435.67	122.922	292.176
ENSMUSG00000037321	Tap1	2.81741	0	2.42209	7.55059e-55	-0.10297	1	-0.47536	4.76074e-05	0.760317	402.886	2878.53	373.782	2039.24
ENSMUSG00000031880	Rrad	2.17874	2.68358e-84	1.93663	1.52777e-15	-0.495265	0.0944012	-0.704284	6.39531e-05	0.845507	58.6518	270.266	42.4506	163.358
ENSMUSG00000028525	Pde4b	1.55187	0	1.01012	3.938e-13	0.125276	0.915043	-0.39164	8.28465e-05	0.686936	1249.45	3717.34	1361.75	2787.05
ENSMUSG00000073411	H2-D1	2.33383	1.60512e-299	2.00372	2.73928e-40	-0.141849	1	-0.449429	9.50203e-05	0.795473	337.939	1732.42	307.076	1249.65
ENSMUSG00000031103	Elf4	1.512	7.61658e-136	1.05397	1.17376e-10	-0.0436331	1	-0.481031	0.000214486	0.727976	292.662	847.172	283.278	599.052
ENSMUSG00000037921	Ddx60	5.58442	0	4.92956	4.13704e-115	0.128087	1	-0.494353	0.00037267	0.635138	28.4125	1386.68	31.9364	966.788
ENSMUSG00000056116	H2-T22	2.45458	0	1.98618	1.15594e-44	0.048891	1	-0.398193	0.000450432	0.722765	310.496	1727.88	319.876	1290.57
ENSMUSG00000063564	Col23a1	1.24056	4.03866e-31	0.984926	1.3141e-05	-0.389233	0.089891	-0.622707	0.000494588	0.837622	115.824	278.013	88.2905	178.318
ENSMUSG00000003617	Cp	1.90428	0	1.63607	1.68733e-30	-0.152171	0.5891	-0.396512	0.000762203	0.830349	3660.62	13908.6	3290.22	10400.1
ENSMUSG00000060441	Trim5	2.1135	1.29287e-28	1.42803	0.00662129	-0.495032	0.365555	-1.16449	0.000924428	0.621803	26.8459	117.449	18.2207	50.3026
ENSMUSG00000061232	H2-K1	2.29547	9.1577e-302	1.95297	7.18024e-50	-0.0184148	1	-0.33707	0.00141588	0.788671	798.558	3975.83	788.251	3098.65
ENSMUSG00000002983	Relb	2.32831	0	2.16382	4.86521e-33	-0.285823	0.294556	-0.42635	0.00163363	0.892241	205.651	1049.56	169.745	770.562
ENSMUSG00000072244	Trim6	1.49039	4.44751e-20	0.812932	0.14501	-0.123573	1	-0.752026	0.0018188	0.625267	38.2684	109.142	36.111	62.9951
ENSMUSG00000055447	Cd47	1.51129	0	1.27808	4.19333e-25	-0.105638	0.927608	-0.314979	0.00186636	0.850742	1654.18	4785.52	1535.72	3785.16
ENSMUSG00000038387	Rras	1.24106	2.80735e-179	1.05929	5.70344e-14	-0.1912	0.2741	-0.350706	0.00200794	0.88162	638.172	1531.16	557.617	1181.97
ENSMUSG00000039616	Mocos	1.65018	1.8655e-38	1.35415	1.23851e-07	-0.342893	0.452893	-0.606747	0.0024974	0.814486	56.9076	180.984	45.3368	116.776
ENSMUSG00000109408	A930037H05Rik	1.05324	1.07288e-11	0.472518	0.713368	-0.144964	1	-0.709242	0.0026731	0.668628	53.8856	113.717	48.5622	69.1392
ENSMUSG00000023067	Cdkn1a	1.02884	0	0.671862	0.00591734	-0.158989	0.861414	-0.493941	0.00291366	0.780798	4576.4	9477.31	4093.52	6619.92
ENSMUSG00000090942	F830016B08Rik	6.55444	7.66794e-186	5.68179	1.85186e-76	0.363928	1	-0.488213	0.00316823	0.546143	2.575	253.282	3.23426	177.204
ENSMUSG00000022587	Ly6e	2.33533	0	1.93713	6.51899e-14	-0.232219	0.734159	-0.609714	0.00338136	0.758802	303.083	1550.91	257.129	1001.55
ENSMUSG00000034855	Cxcl10	8.5763	0	8.10767	6.74421e-272	0.136281	1	-0.320696	0.00402755	0.722649	46.3322	17893.3	51.3329	14097.5
ENSMUSG00000026104	Stat1	4.15991	0	3.94883	2.95868e-151	-0.0882562	1	-0.276155	0.00473286	0.863893	508.083	9225.26	477.72	7496.84
ENSMUSG00000040253	Gbp7	3.77562	0	3.52548	1.03433e-140	-0.103216	1	-0.32912	0.00535418	0.840812	401.72	5589.56	374.148	4377.64
ENSMUSG00000005125	Ndrg1	1.11249	8.54255e-274	0.744589	7.54203e-09	0.0799063	1	-0.265123	0.00799678	0.77491	2946.54	6467.87	3109.71	5296.3
ENSMUSG00000035929	H2-Q4	3.77836	0	2.97094	4.279e-76	0.438996	0.0383346	-0.347667	0.0101696	0.571406	121.356	1694.48	164.814	1312.15
ENSMUSG00000073555	Gm4951	7.30252	9.12431e-217	7.25352	9.74518e-84	-0.401013	1	-0.463587	0.0127221	0.966607	2.01077	335.39	1.71041	237.835
ENSMUSG00000028341	Nr4a3	1.49587	3.3785e-38	0.605326	0.0274296	0.385623	0.0911162	-0.479456	0.0158332	0.539409	77.7027	223.147	101.495	156.395
ENSMUSG00000026942	Traf2	1.2305	1.07191e-98	0.774192	2.42315e-05	0.0983614	1	-0.338793	0.01633	0.728849	332.1	791.111	353.875	617.014
ENSMUSG00000074170	Plekhf1	1.33085	3.33396e-132	1.09392	3.72253e-09	-0.184353	0.482764	-0.402693	0.0165353	0.848554	357.136	912.697	313.42	681.466
ENSMUSG00000029561	Oasl2	7.19745	0	6.91579	1.20965e-284	-0.026584	1	-0.277743	0.016542	0.822645	40.7072	6083.04	38.2072	4938.65
ENSMUSG00000044350	Lacc1	1.14174	1.8505e-59	0.841661	5.07709e-06	-0.0994592	1	-0.373899	0.0182759	0.81221	242.742	542.636	225.41	410.708
ENSMUSG00000040483	Xaf1	5.54118	0	5.52741	4.36742e-153	-0.334604	0.698848	-0.328849	0.0193359	0.990501	29.262	1386.21	22.2525	1085.87
ENSMUSG00000038213	Tapbpl	1.45156	1.06136e-66	1.28093	1.10554e-08	-0.349087	0.0762295	-0.491891	0.0197884	0.88845	157.892	437.967	124.793	308.357
ENSMUSG00000020400	Tnip1	1.85957	5.52162e-222	1.60776	5.82058e-33	-0.0620358	1	-0.288979	0.0209385	0.83984	449.7	1657.83	431.626	1334.97
ENSMUSG00000020806	Rhbdf2	2.35366	2.04371e-207	2.19664	9.189e-25	-0.269671	0.610501	-0.410538	0.024257	0.896878	128.17	665.963	105.474	495.158
ENSMUSG00000032596	Uba7	4.24947	0	3.77322	3.42563e-70	0.0862165	1	-0.359581	0.0260029	0.71884	39.2997	761.091	42.8564	585.627
ENSMUSG00000019866	Crybg1	1.71322	3.88904e-49	1.49154	9.9117e-18	-0.194577	0.990784	-0.390533	0.0273203	0.857565	110.557	367.515	96.5683	275.447
ENSMUSG00000038521	C1s1	1.3637	2.22454e-33	1.29097	0.00482965	-0.644958	0.051221	-0.692382	0.0274473	0.950839	102.178	267.372	64.7699	161.376
ENSMUSG00000027962	Vcam1	2.27669	0	2.09819	8.48865e-68	-0.0757634	1	-0.23089	0.0279165	0.883624	4322.17	21255.2	4095.62	17823.7
ENSMUSG00000041801	Phlda3	1.09835	6.08475e-226	0.550123	0.0271626	0.179952	0.714065	-0.346059	0.028864	0.683861	1434.89	3118.37	1624.07	2415.69
ENSMUSG00000048779	P2ry6	3.23994	1.07308e-248	2.83755	1.60221e-57	0.0582949	1	-0.318231	0.0312798	0.7566	55.4215	531.258	58.1308	419.959
ENSMUSG00000057367	Birc2	1.354	1.16033e-245	1.15888	1.08259e-12	-0.144497	0.814185	-0.317483	0.0328109	0.873495	749.652	1947.26	676.336	1536.07
ENSMUSG00000038507	Parp12	2.4144	0	2.19838	5.03949e-59	-0.0559567	1	-0.251274	0.0343298	0.86094	412.644	2233.06	394.612	1846.62
ENSMUSG00000032841	Prr5l	1.63016	3.18068e-124	1.17853	1.95358e-11	0.13234	1	-0.298658	0.0437282	0.731215	197.926	623.153	217.252	499.715

## Sheet: Microglia
DEGs whose upregulation during T. gondii infection was impaired by CXCR3-deficiency in microglia.
id	Symbol	uninfected WT vs infected WT		uninfected KO vs infected KO		uninfected WT vs uninfected KO		infected WT vs infected KO		Fold change between "uninfected WT vs infected WT" vs "uninfected KO vs infected KO"	mean iDEGES-normalized count
		log2FoldChange	FDR	log2FoldChange	FDR	log2FoldChange	FDR	log2FoldChange	FDR		uninfected WT	infected WT	uninfected KO	infected KO
ENSMUSG00000004296	Il12b	13.0355	0	11.682	0	0.028588	1	-1.31148	7.60155e-205	0.391358	1.20528	10649.2	1.28836	4185.39
ENSMUSG00000025746	Il6	9.14398	0	8.85453	0	-0.69206	0.243277	-0.980106	5.20437e-78	0.818214	15.8572	8701.3	9.61487	4300.12
ENSMUSG00000032487	Ptgs2	7.74433	0	6.75677	0	0.396529	0.000595295	-0.588048	1.39404e-53	0.504327	262.772	54206.2	343.684	35155.7
ENSMUSG00000029380	Cxcl1	7.27636	0	6.4169	0	0.205175	1	-0.646663	4.35123e-47	0.551159	26.1177	3900.62	28.9709	2426.43
ENSMUSG00000020010	Vnn3	9.04217	0	7.95411	0	0.356908	1	-0.731103	4.61949e-47	0.470392	9.29938	4766.29	11.7681	2804.41
ENSMUSG00000036528	Ppfibp2	3.09384	0	2.53576	0	-0.0501761	1	-0.609474	2.50455e-40	0.679206	349.064	2873.03	335.255	1833.16
ENSMUSG00000050395	Tnfsf15	6.18546	0	5.76885	0	-0.362478	0.848389	-0.778749	1.01566e-37	0.749181	21.1897	1498.04	16.4628	846.244
ENSMUSG00000026456	Cyb5r1	1.45657	2.521e-293	1.27569	2.0278e-143	-0.343947	1.53113e-11	-0.525614	7.5403e-32	0.882168	1512.71	4003.04	1187.87	2708.85
ENSMUSG00000030162	Olr1	3.56601	0	2.93592	0	0.0771136	1	-0.554385	6.77158e-31	0.646137	313.771	3578.56	328.418	2379.58
ENSMUSG00000015396	Cd83	2.07251	0	0.995635	5.42582e-34	0.303306	0.000358615	-0.773735	1.62246e-29	0.474054	331.108	1339.76	408.196	768.643
ENSMUSG00000027074	Slc43a3	1.7066	0	1.34634	7.40164e-85	-0.294744	1.49687e-05	-0.656689	5.87282e-29	0.779024	542.817	1707.99	440.553	1056.32
ENSMUSG00000005686	Ampd3	1.08948	1.79878e-135	0.910002	1.66581e-73	-0.348322	1.31181e-15	-0.529641	1.84128e-22	0.883021	1233.39	2530.78	965.418	1705.29
ENSMUSG00000023927	Satb1	1.91613	1.06742e-97	1.43089	1.45824e-34	-0.402871	0.00909501	-0.889045	1.35906e-21	0.714375	116.114	423.966	88.4092	222.45
ENSMUSG00000042129	Rassf4	1.73052	5.98234e-233	1.53624	0	-0.1693	0.0124786	-0.364009	1.47162e-21	0.874008	5464.18	17474.7	4843.37	13238.7
ENSMUSG00000058755	Osm	2.13536	4.54374e-195	1.48473	3.48631e-98	0.029537	1	-0.623342	1.9094e-20	0.637001	264.9	1123.35	268.234	707.52
ENSMUSG00000029254	Stap1	1.31505	9.44403e-149	0.723451	1.18632e-18	-0.110241	0.389846	-0.702622	3.57137e-20	0.663609	777.915	1864.13	717.857	1118.05
ENSMUSG00000073530	Pappa2	4.35532	1.78321e-124	4.14526	3.66767e-48	-1.04416	0.134652	-1.25012	1.62791e-19	0.864503	9.5902	191.416	4.74698	78.1037
ENSMUSG00000052631	Sh2d6	2.48091	1.895e-71	1.77551	1.34819e-19	-0.470559	0.191417	-1.17693	4.7582e-19	0.613272	35.6395	193.186	25.7011	81.7128
ENSMUSG00000020275	Rel	2.19129	0	1.77645	6.26627e-186	-0.0397109	1	-0.456057	1.21357e-18	0.7501	893.213	3933.42	864.976	2794.85
ENSMUSG00000075122	Cd80	3.00079	0	2.80433	0	-0.305947	0.00272006	-0.503076	2.68178e-18	0.87269	244.373	1884.41	196.961	1295.8
ENSMUSG00000020340	Cyfip2	1.09475	3.18814e-73	0.682357	1.36099e-27	-0.167482	0.0271477	-0.580399	8.26514e-18	0.751377	577.467	1190.14	512.82	775.721
ENSMUSG00000039195	1110008P14Rik	1.29777	1.71988e-71	0.8091	8.79104e-19	-0.190585	0.188963	-0.680354	1.51376e-17	0.712683	212.731	503.953	186.157	307.112
ENSMUSG00000015335	Zdhhc12	1.115	2.17028e-64	0.697681	8.81271e-17	-0.202754	0.0574711	-0.621547	3.97029e-17	0.748816	285.456	595.572	246.88	377.024
ENSMUSG00000045502	Hcar2	1.93649	0	1.80726	6.1731e-279	-0.301557	2.41142e-09	-0.43293	1.65319e-16	0.914321	896.947	3311.53	724.393	2386.2
ENSMUSG00000021266	Wars	1.13496	1.40199e-219	1.03762	8.47661e-107	-0.283705	6.96664e-13	-0.381535	5.19694e-16	0.934758	2062.95	4366.54	1690.19	3266.28
ENSMUSG00000018906	P4ha2	1.97929	1.06496e-298	1.89629	1.52589e-148	-0.372087	3.93814e-05	-0.456027	1.78458e-15	0.944091	320.407	1217.72	246.757	864.892
ENSMUSG00000000982	Ccl3	2.1366	9.03832e-244	1.81803	6.63578e-112	-0.387413	1.001e-13	-0.70607	2.53334e-15	0.801862	11931.6	50586.5	9096.56	30231.5
ENSMUSG00000097418	Mir155hg	8.39239	0	7.86411	0	0.0307726	1	-0.495205	9.54899e-14	0.693384	4.72433	1589.88	5.00799	1097.87
ENSMUSG00000029131	Dnajb6	1.38925	0	1.06646	2.77814e-112	-0.0324679	1	-0.355287	2.69182e-13	0.799525	2263.9	5714.9	2208.43	4352.43
ENSMUSG00000025383	Il23a	6.41297	2.8507e-203	6.01992	1.36453e-102	-0.46375	1	-0.846851	2.74706e-13	0.761514	3.01686	254.157	2.17026	139.267
ENSMUSG00000018916	Csf2	13.4881	0	12.4681	2.50424e-226	0	1	-0.850677	8.04508e-13	0.493131	0	1336.56	0	721.335
ENSMUSG00000028163	Nfkb1	1.41516	0	1.29912	7.34202e-212	-0.183826	2.41942e-06	-0.300712	1.72372e-12	0.922711	2303.82	5921.16	2021.54	4687.25
ENSMUSG00000046080	Clec9a	1.20522	1.79909e-15	0.202961	1	-0.251919	0.745817	-1.25375	2.1412e-12	0.499217	45.504	100.869	37.8458	39.3718
ENSMUSG00000054708	Ankrd24	2.32977	2.47473e-250	1.52603	6.32587e-86	0.342526	0.000769811	-0.462001	5.08386e-12	0.572862	179.582	871.118	227.89	614.918
ENSMUSG00000020427	Igfbp3	1.94119	0	1.80556	1.71358e-227	-0.199292	0.0158318	-0.335466	1.52664e-11	0.91027	571.379	2115.6	496.989	1630.76
ENSMUSG00000058056	Palld	1.70961	0	1.57276	3.14427e-207	-0.149431	0.0519244	-0.286795	1.84669e-11	0.909501	1578.72	4979.89	1416.75	3975.95
ENSMUSG00000019852	Arfgef3	1.24017	7.7865e-21	0.299583	0.433188	-0.0899274	1	-1.03391	2.29754e-11	0.521021	60.7322	139.523	56.124	64.4054
ENSMUSG00000107546	Gm20560	3.29004	5.15874e-98	3.11566	2.58839e-45	-0.670862	0.184266	-0.846038	5.20958e-10	0.886146	18.5258	175.507	11.606	97.1183
ENSMUSG00000029223	Uchl1	1.29395	1.94577e-69	1.08356	9.03372e-35	-0.264307	0.0237539	-0.475731	1.46102e-09	0.864309	231.733	547.16	192.569	381.393
ENSMUSG00000037418	Best1	3.52826	5.89833e-72	2.75449	2.8072e-24	-0.224788	1	-1.00275	2.06534e-09	0.584887	10.7892	120.279	9.62807	60.1411
ENSMUSG00000035356	Nfkbiz	5.30657	0	5.13675	0	-0.0675733	1	-0.238039	2.40297e-09	0.888954	235.737	8995.92	224.898	7436.82
ENSMUSG00000030469	Zfp719	1.49918	1.58867e-71	0.971571	2.00217e-11	-0.0988048	1	-0.635374	3.87675e-09	0.693702	147.343	401.048	136.552	255.191
ENSMUSG00000038059	Smim3	2.07502	7.14879e-238	1.92799	5.94123e-118	-0.220124	0.160904	-0.368962	3.93492e-09	0.903106	239.502	974.906	206.444	734.913
ENSMUSG00000030287	Itpr2	1.25486	3.08632e-187	0.981244	5.96068e-76	-0.0343338	1	-0.30982	5.62796e-09	0.827243	949.472	2185.6	922.619	1717.2
ENSMUSG00000046447	Camk2n1	2.45286	6.77478e-154	2.34963	2.64771e-94	-0.38773	0.0518213	-0.492353	1.93079e-08	0.930949	79.5396	421.211	60.855	291.073
ENSMUSG00000049191	Rgag4	1.63926	7.40743e-112	1.16635	3.53517e-49	0.0411114	1	-0.433472	3.64321e-08	0.720513	219.695	660.145	224.743	476.48
ENSMUSG00000021322	Aoah	2.30016	0	2.20867	0	-0.107187	0.140772	-0.199262	9.74786e-08	0.938549	1448.57	6874.46	1339.5	5838.98
ENSMUSG00000023106	Denr	1.51423	0	1.32893	3.74513e-182	-0.0740993	0.389243	-0.260512	1.67341e-07	0.879467	1207.22	3326.17	1143.63	2702.08
ENSMUSG00000043421	Hilpda	1.67452	2.58595e-127	1.06455	1.01332e-58	0.273785	0.00493483	-0.338165	2.17054e-07	0.655214	295.238	908.534	356.849	699.975
ENSMUSG00000043953	Ccrl2	3.63022	0	3.51008	0	-0.178962	0.18412	-0.300869	3.30907e-07	0.920095	229.574	2743.17	200.956	2167.39
ENSMUSG00000031155	Pim2	3.37944	2.01234e-292	2.87326	2.14074e-152	0.10151	1	-0.405	1.67832e-06	0.704085	59.4738	596.355	64.181	441.745
ENSMUSG00000024597	Slc12a2	1.45329	3.72239e-98	1.09409	4.22446e-30	-0.105728	0.793247	-0.468146	1.78823e-06	0.779595	322.35	849.418	296.826	602.921
ENSMUSG00000024661	Fth1	1.61556	0	1.58254	3.34536e-179	-0.244914	5.36685e-13	-0.278368	4.01772e-06	0.977372	147472	435428	124069	350152
ENSMUSG00000018796	Acsl1	2.5698	0	2.12527	0	0.192255	5.88296e-06	-0.253427	6.62465e-06	0.734824	1619.84	9265.23	1844.35	7575.88
ENSMUSG00000000732	Icosl	2.57682	1.44119e-289	2.20566	6.95692e-172	0.0276141	1	-0.34325	6.69673e-06	0.773159	174.351	1001.42	177.202	774.217
ENSMUSG00000031779	Ccl22	4.97923	0	4.43334	1.95543e-306	0.163679	1	-0.38272	1.60337e-05	0.684966	61.589	1876.62	68.95	1400.53
ENSMUSG00000063568	Jazf1	2.09152	8.12045e-122	2.00181	2.46347e-79	-0.289675	0.199279	-0.381525	2.01796e-05	0.939711	110.504	455.262	90.5821	340.098
ENSMUSG00000024424	Ttc39c	2.36311	2.7442e-195	2.0446	9.23746e-89	-0.0484491	1	-0.366992	2.76507e-05	0.801899	117.226	582.225	113.51	438.9
ENSMUSG00000041028	Ghitm	1.37797	2.20718e-173	1.32346	1.80549e-155	-0.186054	0.00279192	-0.240806	3.00701e-05	0.962927	4003.29	10022.6	3506.68	8272.83
ENSMUSG00000004707	Ly9	1.59873	0	1.27386	1.98384e-185	0.120144	0.021407	-0.20551	5.80545e-05	0.798373	1536.07	4482.1	1664	3789.07
ENSMUSG00000039158	Akna	1.15247	1.7451e-119	1.09811	2.23019e-89	-0.19778	0.000296413	-0.253106	6.55108e-05	0.963018	1489.4	3192.48	1294.84	2605.73
ENSMUSG00000029821	Dfna5	1.66841	6.75478e-85	1.34204	1.01472e-42	-0.0361003	1	-0.364233	0.000122103	0.79754	128.107	393.591	123.941	298.312
ENSMUSG00000052062	Pard3b	1.0352	1.60306e-15	0.744613	0.000135477	-0.333432	0.154725	-0.628851	0.000140493	0.817572	70.1018	139.427	54.8644	85.5398
ENSMUSG00000004267	Eno2	1.301	7.78102e-36	1.03302	2.1666e-14	-0.188632	0.644822	-0.458432	0.000155984	0.830482	92.6434	220.973	79.9128	155.259
ENSMUSG00000030745	Il21r	1.33208	1.74649e-123	0.684939	9.38315e-27	0.396162	3.02563e-10	-0.252954	0.000530193	0.638543	664.746	1614.49	869.817	1316.98
ENSMUSG00000027995	Tlr2	2.25395	0	2.08164	0	-0.00463833	1	-0.177786	0.000575566	0.887422	1962.17	9017.95	1947.7	7776.34
ENSMUSG00000020648	Dus4l	1.2067	8.57561e-15	0.853858	4.0971e-07	-0.214795	0.7644	-0.572034	0.000659814	0.78304	63.3567	141.245	54.0234	91.3342
ENSMUSG00000099974	Bcl2a1d	1.48998	2.03119e-100	1.10577	3.16419e-36	0.126217	0.761353	-0.256559	0.000688179	0.766199	1206.57	3262.83	1314.87	2661.33
ENSMUSG00000046516	Cox17	1.33519	5.89093e-97	1.17543	3.1004e-71	-0.07299	1	-0.234451	0.000764879	0.895173	398.923	970.115	379.277	801.626
ENSMUSG00000022237	Ankrd33b	2.76746	0	2.49404	2.92411e-272	0.0555566	1	-0.218767	0.00109657	0.827358	214.561	1407.03	222.131	1176.5
ENSMUSG00000091971	Hspa1a	1.152	5.89439e-09	0.892608	4.1313e-07	-0.273984	0.936716	-0.547415	0.00144065	0.835437	64.3511	136.682	53.2766	91.0467
ENSMUSG00000032849	Abcc4	1.09138	9.3213e-94	0.90855	1.07865e-43	-0.032835	1	-0.215845	0.00164381	0.880972	468.667	961.47	457.484	805.817
ENSMUSG00000052144	Ppp4r2	1.11574	3.83646e-142	1.01859	6.02892e-86	-0.101138	0.147429	-0.198054	0.0024454	0.934876	1472.94	3074.33	1370.44	2615.62
ENSMUSG00000079499	6530402F18Rik	5.59938	0	5.54811	0	-0.187849	1	-0.239339	0.00287487	0.965088	23.325	1096.34	20.6412	900.246
ENSMUSG00000030516	Tjp1	1.48118	0	1.34866	2.73759e-179	-0.0263781	1	-0.15956	0.00315557	0.912239	984.819	2650.89	965.057	2309.75
ENSMUSG00000031530	Dusp4	2.54278	3.1067e-286	2.08214	4.93539e-202	0.266804	0.0410839	-0.195615	0.00391156	0.726665	192.699	1080.93	231.612	919.318
ENSMUSG00000059588	Calcrl	1.15387	4.40535e-117	0.893194	1.75527e-31	0.0251303	1	-0.238146	0.00480575	0.834694	595.744	1278	602.777	1058.18
ENSMUSG00000024737	Slc15a3	1.43353	5.66278e-299	1.30373	6.65317e-183	-0.0177544	1	-0.147431	0.00539828	0.913955	11994.3	31227	11813.6	27473.2
ENSMUSG00000028599	Tnfrsf1b	2.90199	0	2.85278	0	-0.0803895	0.00880491	-0.129714	0.00779517	0.966464	5994.67	43186.7	5653.79	38469
ENSMUSG00000095609	Gm21188	2.06875	0	1.5396	1.31341e-168	0.35397	1.60761e-07	-0.17594	0.00813034	0.692962	509.92	2061	649.416	1782.86
ENSMUSG00000035513	Ntng2	7.50246	0	6.71225	0	0.518378	1	-0.272176	0.00923053	0.578259	6.57793	1172.01	9.66178	944.015
ENSMUSG00000042507	Elmsan1	1.09675	3.01395e-65	1.04267	6.31107e-83	-0.136248	0.0854034	-0.19149	0.0194387	0.963204	870.805	1797.33	789.783	1531.26
ENSMUSG00000005413	Hmox1	1.33787	0	1.29621	1.94836e-138	-0.113451	3.78109e-05	-0.155934	0.0275133	0.971533	7344.51	17888.9	6766.83	15654.6
ENSMUSG00000061132	Blnk	1.38337	4.4832e-193	1.14667	5.94263e-96	0.0760408	0.398255	-0.160729	0.0333285	0.848686	1060.16	2669.11	1116.34	2322.85
ENSMUSG00000027333	Smox	1.71944	4.79952e-307	1.53584	6.84147e-144	0.0166879	1	-0.169393	0.0337192	0.880506	920.808	2926.23	927.411	2532.59
ENSMUSG00000018476	Kdm6b	2.08284	5.20168e-219	1.50989	1.62913e-74	0.356696	2.976e-06	-0.215084	0.0453852	0.67224	344.277	1408.29	441.311	1177.8
