# Supplementary material for: Transcriptomic Analysis of the Effects of Chemokine Receptor CXCR3 Deficiency on Immune Responses in the Mouse Brain during Toxoplasma gondii Infection
Source: Microorganisms. 2021 Nov 12;9(11):2340. doi: 10.3390/microorganisms9112340 (PMC8620038; doi:10.3390/microorganisms9112340)
Supplement: Supplementary file 1 [file microorganisms-09-02340-s001.zip › TableS4_GO.xlsx]

## Sheet: Sheet1
Table S2. Detailed data for top 10 GO terms overrepresented in the DEGs in which upregulation during infection was impaired by CXCR3-deficiency in astrocytes and microglia.
Cell type	Accession no.	# DEGs	# reference genes	GO term	FDR	DEGs in category
Astrocyte	GO:0019882	10	96	antigen processing and presentation	0	H2-T23, Tap2, Psmb9, Tap1, H2-D1, H2-T22, H2-K1, Relb, H2-Q4, Tapbpl
	GO:0002376	42	2306	immune system process	1.84322e-17	Nos2, Tlr2, Gbp10, Gbp6, Spib, Gbp5, H2-T23, Oas2, Tap2, Fas, Psmb9, C1ra, Trim30a, Zfp36, Gbp9, Irf8, Lcn2, Tap1, Pde4b, H2-D1, Elf4, Ddx60, H2-T22, H2-K1, Relb, Trim6, Cd47, Rras, Cdkn1a, Cxcl10, Stat1, Gbp7, Ndrg1, H2-Q4, Nr4a3, Traf2, Oasl2, Tapbpl, Tnip1, C1s1, Vcam1, Birc2
	GO:0006952	32	1432	defense response	6.98992e-15	Nos2, Tlr2, Gbp10, Gbp6, Gbp5, H2-T23, Oas2, Tap2, Fas, C1ra, Cspg4, Trim30a, Zfp36, Gbp9, Irf8, Lcn2, Tap1, Elf4, Ddx60, H2-K1, Relb, Trim6, Cd47, F830016B08Rik, Cxcl10, Stat1, Gbp7, Gm4951, Oasl2, Tnip1, C1s1, Birc2
	GO:0006955	31	1316	immune response	8.45971e-15	Nos2, Tlr2, Gbp10, Gbp6, Gbp5, H2-T23, Oas2, Tap2, Fas, C1ra, Trim30a, Gbp9, Irf8, Lcn2, Tap1, Pde4b, H2-D1, Elf4, Ddx60, H2-K1, Relb, Trim6, Cxcl10, Stat1, Gbp7, Nr4a3, Traf2, Oasl2, Tnip1, C1s1, Birc2
	GO:0045087	24	714	innate immune response	4.1259e-14	Nos2, Tlr2, Gbp10, Gbp6, Gbp5, H2-T23, Oas2, Tap2, C1ra, Trim30a, Gbp9, Irf8, Lcn2, Tap1, Elf4, Ddx60, Relb, Trim6, Stat1, Gbp7, Oasl2, Tnip1, C1s1, Birc2
	GO:0006950	43	3396	response to stress	3.17075e-12	Nos2, Tlr2, Gbp10, Gbp6, Dusp15, Gadd45b, Gbp5, Rcan1, H2-T23, Oas2, Tap2, Fam129a, Fas, C1ra, Cspg4, Fgf2, Trim30a, Zfp36, Gbp9, Irf8, Lcn2, Tap1, Elf4, Ddx60, H2-K1, Relb, Trim6, Cd47, Cdkn1a, F830016B08Rik, Cxcl10, Stat1, Gbp7, Gm4951, Nr4a3, Traf2, Oasl2, Tnip1, Uba7, C1s1, Phlda3, Birc2, Prr5l
	GO:0051707	23	889	response to other organism	3.25163e-12	Nos2, Tlr2, Gbp10, Gbp6, H2-T23, Oas2, Tap2, Fas, Trim30a, Zfp36, Gbp9, Irf8, Lcn2, Pde4b, Ddx60, H2-K1, Trim6, Cd47, Cxcl10, Stat1, Gbp7, Oasl2, Tnip1
	GO:0043207	23	891	response to external biotic stimulus	3.25163e-12	Nos2, Tlr2, Gbp10, Gbp6, H2-T23, Oas2, Tap2, Fas, Trim30a, Zfp36, Gbp9, Irf8, Lcn2, Pde4b, Ddx60, H2-K1, Trim6, Cd47, Cxcl10, Stat1, Gbp7, Oasl2, Tnip1
	GO:0009607	23	934	response to biotic stimulus	9.47006e-12	Nos2, Tlr2, Gbp10, Gbp6, H2-T23, Oas2, Tap2, Fas, Trim30a, Zfp36, Gbp9, Irf8, Lcn2, Pde4b, Ddx60, H2-K1, Trim6, Cd47, Cxcl10, Stat1, Gbp7, Oasl2, Tnip1
	GO:0002252	20	670	immune effector process	2.69679e-10	Tlr2, H2-T23, Oas2, Tap2, Fas, C1ra, Trim30a, Tap1, H2-D1, Ddx60, H2-K1, Relb, Trim6, Cd47, Cxcl10, Stat1, Nr4a3, Traf2, Oasl2, C1s1
Microglia	GO:0006954	18	647	inflammatory response	3.60822e-07	Il12b, Il6, Ptgs2, Cxcl1, Olr1, Rel, Ccl3, Il23a, Nfkb1, Nfkbiz, Aoah, Ccrl2, Ccl22, Tlr2, Calcrl, Tnfrsf1b, Hmox1, Kdm6b
	GO:0001819	14	402	positive regulation of cytokine production	3.45965e-06	Il12b, Il6, Ptgs2, Tnfsf15, Cd83, Rel, Ccl3, Il23a, Csf2, Clec9a, Hilpda, Icosl, Ly9, Tlr2
	GO:0006955	22	1316	immune response	9.98732e-06	Il12b, Il6, Cxcl1, Tnfsf15, Cd83, Osm, Stap1, Sh2d6, Rel, Cd80, Ccl3, Il23a, Csf2, Nfkb1, Icosl, Ccl22, Ly9, Tlr2, Bcl2a1d, Tnfrsf1b, Hmox1, Blnk
	GO:0001817	16	635	regulation of cytokine production	1.03735e-05	Il12b, Il6, Ptgs2, Tnfsf15, Cd83, Rel, Ccl3, Il23a, Csf2, Nfkb1, Clec9a, Hilpda, Icosl, Ly9, Tlr2, Hmox1
	GO:0001816	16	707	cytokine production	4.08491e-05	Il12b, Il6, Ptgs2, Tnfsf15, Cd83, Rel, Ccl3, Il23a, Csf2, Nfkb1, Clec9a, Hilpda, Icosl, Ly9, Tlr2, Hmox1
	GO:0002376	27	2306	immune system process	0.00014436	Il12b, Il6, Cxcl1, Tnfsf15, Olr1, Cd83, Ampd3, Satb1, Osm, Stap1, Sh2d6, Rel, Cd80, Hcar2, Ccl3, Il23a, Csf2, Nfkb1, Icosl, Ccl22, Ly9, Tlr2, Bcl2a1d, Ppp4r2, Tnfrsf1b, Hmox1, Blnk
	GO:0006952	20	1432	defense response	0.00041979	Il12b, Il6, Ptgs2, Cxcl1, Olr1, Cd83, Rel, Ccl3, Il23a, Nfkb1, Nfkbiz, Aoah, Ccrl2, Ccl22, Ly9, Tlr2, Calcrl, Tnfrsf1b, Hmox1, Kdm6b
	GO:0001932	20	1372	regulation of protein phosphorylation	0.000689384	Il12b, Il6, Ptgs2, Tnfsf15, Osm, Stap1, Cd80, Wars, Ccl3, Il23a, Csf2, Igfbp3, Uchl1, Camk2n1, Acsl1, Ccl22, Gsdme, Tlr2, Dusp4, Tnfrsf1b
	GO:0042127	21	1634	regulation of cell proliferation	0.00136749	Il12b, Il6, Ptgs2, Cxcl1, Osm, Cd80, Il23a, Csf2, Igfbp3, Camk2n1, Hilpda, Pim2, Fth1, Icosl, Gsdme, Tlr2, Cox17, Abcc4, Calcrl, Tnfrsf1b, Hmox1
	GO:0042325	20	1479	regulation of phosphorylation	0.00146904	Il12b, Il6, Ptgs2, Tnfsf15, Osm, Stap1, Cd80, Wars, Ccl3, Il23a, Csf2, Igfbp3, Uchl1, Camk2n1, Acsl1, Ccl22, Gsdme, Tlr2, Dusp4, Tnfrsf1b
