# Supplementary material for: Transcriptomic Analysis of the Effects of Chemokine Receptor CXCR3 Deficiency on Immune Responses in the Mouse Brain during Toxoplasma gondii Infection
Source: Microorganisms. 2021 Nov 12;9(11):2340. doi: 10.3390/microorganisms9112340 (PMC8620038; doi:10.3390/microorganisms9112340)
Supplement: Supplementary file 1 [file microorganisms-09-02340-s001.zip › TableS5_KEGG.xlsx]

## Sheet: Sheet1
Table S5. Top20 KEGG pathways enriched in the DEGs in which upregulation during infection was impaired by CXCR3-deficiency in astrocytes and microglial cells.
Cell type	KEGG ID	FDR	Gene Ratio	Bg Ratio	Description	DEGs in pathway	Link to pathwaymap
Astrocyte	mmu05169	1.73386e-14	17/42	230/8656	Epstein-Barr virus infection	Tlr2, Gadd45b, H2-T23, Oas2, Tap2, Fas, Tap1, H2-D1, H2-T22, H2-T9, H2-K1, Relb, Cdkn1a, Cxcl10, Stat1, H2-Q4, Traf2	http://www.kegg.jp/kegg-bin/show_pathway?mmu05169/24088/17873/15040/246728/21355/14102/21354/14964/15039/15051/14972/19698/12575/15945/20846/15015/22030
	mmu05167	9.2305e-10	13/42	216/8656	Kaposi sarcoma-associated herpesvirus infection	Rcan1, H2-T23, Fas, Fgf2, Zfp36, H2-D1, H2-T22, H2-T9, H2-K1, Cdkn1a, Stat1, H2-Q4, Traf2	http://www.kegg.jp/kegg-bin/show_pathway?mmu05167/54720/15040/14102/14173/22695/14964/15039/15051/14972/12575/20846/15015/22030
	mmu05168	2.44777e-07	14/42	439/8656	Herpes simplex virus 1 infection	Tlr2, H2-T23, Oas2, Tap2, Fas, Tap1, H2-D1, H2-T22, H2-T9, H2-K1, Stat1, H2-Q4, Traf2, Birc2	http://www.kegg.jp/kegg-bin/show_pathway?mmu05168/24088/15040/246728/21355/14102/21354/14964/15039/15051/14972/20846/15015/22030/11797
	mmu04612	2.44777e-07	8/42	91/8656	Antigen processing and presentation	H2-T23, Tap2, Tap1, H2-D1, H2-T22, H2-T9, H2-K1, H2-Q4	http://www.kegg.jp/kegg-bin/show_pathway?mmu04612/15040/21355/21354/14964/15039/15051/14972/15015
	mmu04145	2.44777e-07	10/42	181/8656	Phagosome	Tlr2, H2-T23, Tap2, C1ra, Tap1, H2-D1, H2-T22, H2-T9, H2-K1, H2-Q4	http://www.kegg.jp/kegg-bin/show_pathway?mmu04145/24088/15040/21355/50909/21354/14964/15039/15051/14972/15015
	mmu05170	2.44777e-07	11/42	238/8656	Human immunodeficiency virus 1 infection	Tlr2, H2-T23, Tap2, Fas, Tap1, H2-D1, H2-T22, H2-T9, H2-K1, H2-Q4, Traf2	http://www.kegg.jp/kegg-bin/show_pathway?mmu05170/24088/15040/21355/14102/21354/14964/15039/15051/14972/15015/22030
	mmu05330	3.34485e-07	7/42	64/8656	Allograft rejection	H2-T23, Fas, H2-D1, H2-T22, H2-T9, H2-K1, H2-Q4	http://www.kegg.jp/kegg-bin/show_pathway?mmu05330/15040/14102/14964/15039/15051/14972/15015
	mmu05332	3.34485e-07	7/42	65/8656	Graft-versus-host disease	H2-T23, Fas, H2-D1, H2-T22, H2-T9, H2-K1, H2-Q4	http://www.kegg.jp/kegg-bin/show_pathway?mmu05332/15040/14102/14964/15039/15051/14972/15015
	mmu05163	3.34485e-07	11/42	255/8656	Human cytomegalovirus infection	H2-T23, Tap2, Fas, Tap1, H2-D1, H2-T22, H2-T9, H2-K1, Cdkn1a, H2-Q4, Traf2	http://www.kegg.jp/kegg-bin/show_pathway?mmu05163/15040/21355/14102/21354/14964/15039/15051/14972/12575/15015/22030
	mmu04940	4.84352e-07	7/42	70/8656	Type I diabetes mellitus	H2-T23, Fas, H2-D1, H2-T22, H2-T9, H2-K1, H2-Q4	http://www.kegg.jp/kegg-bin/show_pathway?mmu04940/15040/14102/14964/15039/15051/14972/15015
	mmu05320	1.03118e-06	7/42	79/8656	Autoimmune thyroid disease	H2-T23, Fas, H2-D1, H2-T22, H2-T9, H2-K1, H2-Q4	http://www.kegg.jp/kegg-bin/show_pathway?mmu05320/15040/14102/14964/15039/15051/14972/15015
	mmu04218	2.0915e-06	9/42	185/8656	Cellular senescence	Gadd45b, H2-T23, H2-D1, H2-T22, H2-T9, H2-K1, Rras, Cdkn1a, H2-Q4	http://www.kegg.jp/kegg-bin/show_pathway?mmu04218/17873/15040/14964/15039/15051/14972/20130/12575/15015
	mmu05166	2.13141e-05	9/42	246/8656	Human T-cell leukemia virus 1 infection	H2-T23, Zfp36, H2-D1, H2-T22, H2-T9, H2-K1, Relb, Cdkn1a, H2-Q4	http://www.kegg.jp/kegg-bin/show_pathway?mmu05166/15040/22695/14964/15039/15051/14972/19698/12575/15015
	mmu05416	3.74546e-05	6/42	89/8656	Viral myocarditis	H2-T23, H2-D1, H2-T22, H2-T9, H2-K1, H2-Q4	http://www.kegg.jp/kegg-bin/show_pathway?mmu05416/15040/14964/15039/15051/14972/15015
	mmu05165	5.63438e-05	10/42	361/8656	Human papillomavirus infection	H2-T23, Fas, H2-D1, H2-T22, H2-T9, H2-K1, Cdkn1a, Stat1, H2-Q4, Oasl2	http://www.kegg.jp/kegg-bin/show_pathway?mmu05165/15040/14102/14964/15039/15051/14972/12575/20846/15015/23962
	mmu05203	0.000103637	8/42	231/8656	Viral carcinogenesis	H2-T23, H2-D1, H2-T22, H2-T9, H2-K1, Cdkn1a, H2-Q4, Traf2	http://www.kegg.jp/kegg-bin/show_pathway?mmu05203/15040/14964/15039/15051/14972/12575/15015/22030
	mmu04514	0.000124204	7/42	171/8656	Cell adhesion molecules (CAMs)	H2-T23, H2-D1, H2-T22, H2-T9, H2-K1, H2-Q4, Vcam1	http://www.kegg.jp/kegg-bin/show_pathway?mmu04514/15040/14964/15039/15051/14972/15015/22329
	mmu05222	0.000568606	5/42	92/8656	Small cell lung cancer	Nos2, Gadd45b, Cdkn1a, Traf2, Birc2	http://www.kegg.jp/kegg-bin/show_pathway?mmu05222/18126/17873/12575/22030/11797
	mmu05160	0.00078044	6/42	160/8656	Hepatitis C	Oas2, Fas, Cdkn1a, Cxcl10, Stat1, Traf2	http://www.kegg.jp/kegg-bin/show_pathway?mmu05160/246728/14102/12575/15945/20846/22030
	mmu04064	0.00124629	5/42	111/8656	NF-kappa B signaling pathway	Gadd45b, Relb, Traf2, Vcam1, Birc2	http://www.kegg.jp/kegg-bin/show_pathway?mmu04064/17873/19698/22030/22329/11797
Microglia	mmu04060	2.98481e-05	11/47	296/8656	Cytokine-cytokine receptor interaction	Il12b, Il6, Cxcl1, Tnfsf15, Osm, Ccl3, Il23a, Csf2, Ccl22, Il21r, Tnfrsf1b	http://www.kegg.jp/kegg-bin/show_pathway?mmu04060/16160/16193/14825/326623/18413/20302/83430/12981/20299/60504/21938
	mmu05323	2.98481e-05	7/47	87/8656	Rheumatoid arthritis	Il6, Cxcl1, Cd80, Ccl3, Il23a, Csf2, Tlr2	http://www.kegg.jp/kegg-bin/show_pathway?mmu05323/16193/14825/12519/20302/83430/12981/24088
	mmu05134	2.9961e-05	6/47	59/8656	Legionellosis	Il12b, Il6, Cxcl1, Nfkb1, Tlr2, Hspa1a	http://www.kegg.jp/kegg-bin/show_pathway?mmu05134/16160/16193/14825/18033/24088/193740
	mmu05321	2.9961e-05	6/47	60/8656	Inflammatory bowel disease (IBD)	Il12b, Il6, Il23a, Nfkb1, Il21r, Tlr2	http://www.kegg.jp/kegg-bin/show_pathway?mmu05321/16160/16193/83430/18033/60504/24088
	mmu04625	6.68633e-05	7/47	112/8656	C-type lectin receptor signaling pathway	Il12b, Il6, Ptgs2, Il23a, Nfkb1, Itpr2, Ccl22	http://www.kegg.jp/kegg-bin/show_pathway?mmu04625/16160/16193/19225/83430/18033/16439/20299
	mmu05132	7.55738e-05	6/47	75/8656	Salmonella infection	Il6, Cxcl1, Ccl3, Csf2, Nfkb1, Tjp1	http://www.kegg.jp/kegg-bin/show_pathway?mmu05132/16193/14825/20302/12981/18033/21872
	mmu04620	0.000326889	6/47	99/8656	Toll-like receptor signaling pathway	Il12b, Il6, Cd80, Ccl3, Nfkb1, Tlr2	http://www.kegg.jp/kegg-bin/show_pathway?mmu04620/16160/16193/12519/20302/18033/24088
	mmu05146	0.000470865	6/47	108/8656	Amoebiasis	Il12b, Il6, Cxcl1, Csf2, Nfkb1, Tlr2	http://www.kegg.jp/kegg-bin/show_pathway?mmu05146/16160/16193/14825/12981/18033/24088
	mmu04668	0.00054148	6/47	113/8656	TNF signaling pathway	Il6, Ptgs2, Cxcl1, Csf2, Nfkb1, Tnfrsf1b	http://www.kegg.jp/kegg-bin/show_pathway?mmu04668/16193/19225/14825/12981/18033/21938
	mmu05202	0.000868667	7/47	184/8656	Transcriptional misregulation in cancer	Il6, Rel, Csf2, Nfkb1, Igfbp3, Nfkbiz, Bcl2a1d	http://www.kegg.jp/kegg-bin/show_pathway?mmu05202/16193/19696/12981/18033/16009/80859/12047
	mmu04657	0.00183334	5/47	91/8656	IL-17 signaling pathway	Il6, Ptgs2, Cxcl1, Csf2, Nfkb1	http://www.kegg.jp/kegg-bin/show_pathway?mmu04657/16193/19225/14825/12981/18033
	mmu05142	0.00278182	5/47	102/8656	Chagas disease (American trypanosomiasis)	Il12b, Il6, Ccl3, Nfkb1, Tlr2	http://www.kegg.jp/kegg-bin/show_pathway?mmu05142/16160/16193/20302/18033/24088
	mmu04061	0.00278182	5/47	103/8656	Viral protein interaction with cytokine and cytokine receptor	Il6, Cxcl1, Ccl3, Ccl22, Tnfrsf1b	http://www.kegg.jp/kegg-bin/show_pathway?mmu04061/16193/14825/20302/20299/21938
	mmu04630	0.0028494	6/47	165/8656	JAK-STAT signaling pathway	Il12b, Il6, Osm, Il23a, Csf2, Il21r	http://www.kegg.jp/kegg-bin/show_pathway?mmu04630/16160/16193/18413/83430/12981/60504
	mmu04064	0.00341732	5/47	111/8656	NF-kappa B signaling pathway	Ptgs2, Cxcl1, Nfkb1, Bcl2a1d, Blnk	http://www.kegg.jp/kegg-bin/show_pathway?mmu04064/19225/14825/18033/12047/17060
	mmu05140	0.00494683	4/47	69/8656	Leishmaniasis	Il12b, Ptgs2, Nfkb1, Tlr2	http://www.kegg.jp/kegg-bin/show_pathway?mmu05140/16160/19225/18033/24088
	mmu05221	0.00494683	4/47	70/8656	Acute myeloid leukemia	Csf2, Nfkb1, Pim2, Bcl2a1d	http://www.kegg.jp/kegg-bin/show_pathway?mmu05221/12981/18033/18715/12047
	mmu01523	0.00494683	3/47	30/8656	Antifolate resistance	Il6, Nfkb1, Abcc4	http://www.kegg.jp/kegg-bin/show_pathway?mmu01523/16193/18033/239273
	mmu05133	0.00627035	4/47	76/8656	Pertussis	Il12b, Il6, Il23a, Nfkb1	http://www.kegg.jp/kegg-bin/show_pathway?mmu05133/16160/16193/83430/18033
	mmu05167	0.00801723	6/47	216/8656	Kaposi sarcoma-associated herpesvirus infection	Il6, Ptgs2, Cxcl1, Csf2, Nfkb1, Itpr2	http://www.kegg.jp/kegg-bin/show_pathway?mmu05167/16193/19225/14825/12981/18033/16439
